# Supplementary material
Source: publisher site journal article supplement (https://www.spandidos-publications.com/1265/downloadSupplementary)
Supplement: Supplementary file 1 [file downloadSupplementary]

## Sheet: Table SI
Table SI. The SK‑BR‑3 partial proteome was used to identify abundant proteins. n=2 replicates.
UNIPROT ID	Official gene symbol	Description	MASCOT_SCORE McCoy	MASCOT_SCORE RPMI	EMPAI McCoy	EMPAI RPMI	EMPAI_CALC McCoy	EMPAI_CALC RPMI	UNIQPEPS McCoy	UNIQPEPS RPMI	UNIQPEPSEQS McCoy	UNIQPEPSEQS RPMI	COVERAGE McCoy	COVERAGE RPMI	PEPTIDES McCoy	PEPTIDES RPMI
P05787-2	KRT8	keratin, type II cytoskeletal 8 isoform 1	1310.7	1331.8	95.273	178.59	4.0224	4.1325	86	97	56	57	68.2	67.5	RQLETLGQEK,FASFIDK,WSLLQQQK,LQAEIEGLKGQR,KLLEGEESRLESGMQNMSIHTK,NKYEDEINKR,RTEMENEFVLIKK,TEMENEFVLIKK,TQEKEQIKTLNNK,AEAESMYQIKYEELQSLAGK,QLYEEEIRELQSQISDTSVVLSMDNSR,AEAESMYQIK,TEISEMNR,LLEGEESR,GELAIKDANAK,LESGMQNMSIHTK,KLLEGEESR,TKTEISEMNR,QLYEEEIR,SRAEAESMYQIKYEELQSLAGK,HGDDLRR,SRAEAESMYQIK,LALDIEIATYR,ASLEAAIADAEQR,SLDMDSIIAEVK,YEELQSLAGK,VGSSNFR,TKTEISEMNRNISR,LQAEIEGLK,YEDEINKR,FASFIDKVR,QLE…	FASFIDK,RQLETLGQEK,WSLLQQQK,KLLEGEESRLESGMQNMSIHTK,LQAEIEGLKGQR,QLETLGQEKLK,MLETKWSLLQQQK,NKYEDEINKR,TEMENEFVLIKK,AEAESMYQIKYEELQSLAGK,QLYEEEIRELQSQISDTSVVLSMDNSR,AEAESMYQIK,TEISEMNR,GELAIKDANAK,LLEGEESR,LESGMQNMSIHTK,TKTEISEMNR,KLLEGEESR,QLYEEEIR,SRAEAESMYQIKYEELQSLAGK,HGDDLRR,SRAEAESMYQIK,ASLEAAIADAEQR,LALDIEIATYR,SLDMDSIIAEVK,YEELQSLAGK,VGSSNFR,LQAEIEGLK,YEDEINKR,LEAELGNMQGLVEDFK,FASFIDKVR,QLE…
P62937	PPIA	peptidyl-prolyl cis-trans isomerase A isoform 1	500	777	24.3	137.54	4.3367	5.5793	19	27	12	17	64.2	72.1	KITIADCGQLE,GSCFHR,EGMNIVEAMER,VKEGMNIVEAMER,IIPGFMCQGGDFTR,ITIADCGQLE,TSKKITIADCGQLE,VSFELFADKVPK,HNGTGGKSIYGEKFEDENFILK,TEWLDGKHVVFGK,ALSTGEKGFGYK,SIYGEKFEDENFILK	KITIADCGQLE,EGMNIVEAMER,FGSRNGKTSK,IIPGFMCQGGDFTR,FGSRNGK,ITIADCGQLE,FEDENFILK,VSFELFADK,ALSTGEKGFGYK,GSCFHR,VKEGMNIVEAMER,TSKKITIADCGQLE,VSFELFADKVPK,HNGTGGKSIYGEKFEDENFILK,TEWLDGKHVVFGK,TAENFRALSTGEK,SIYGEKFEDENFILK
P08727	KRT19	Keratin, type I cytoskeletal 19	1138.3	1445	28.893	70.977	3.6051	4.8228	57	62	40	41	80.5	81.5	LAADDFRTKFETEQALR,IVLQIDNAR,VLDELTLAR,TEELNR,QNQEYQR,SRLEQEIATYR,LASYLDK,DYSHYYTTIQDLR,LAADDFR,DYSHYYTTIQDLRDK,SEVTDLR,IRDWYQK,SLLEGQEDHYNNLSASKVL,FGPGVAFR,LASYLDKVR,NHEEEISTLR,ADSERQNQEYQR,TEELNREVAGHTEQLQMSR,GQVGGQVSVEVDSAPGTDLAK,TDLEMQIEGLKEELAYLKK,SEVTDLRR,DAEAWFTSR,QSSATSSFGGLGGGSVR,LEQEIATYR,MSVEADINGLR,ALEAANGELEVK,KDAEAWFTSR,SQYEVMAEQNRK,LTMQNLNDR,SLLEGQEDHYNNLSASK,TKFETEQALR,APSIHGGSGGR,…	IVLQIDNAR,TEELNR,VLDELTLAR,QNQEYQR,RVLDELTLAR,SRLEQEIATYR,LASYLDK,DYSHYYTTIQDLR,LAADDFR,SEVTDLR,DYSHYYTTIQDLRDK,IRDWYQK,FGPGVAFR,LASYLDKVR,NHEEEISTLR,ADSERQNQEYQR,TEELNREVAGHTEQLQMSR,GQVGGQVSVEVDSAPGTDLAK,TDLEMQIEGLKEELAYLKK,SEVTDLRR,DAEAWFTSR,QSSATSSFGGLGGGSVR,LEQEIATYR,ALEAANGELEVK,MSVEADINGLR,KNHEEEISTLR,KDAEAWFTSR,SLLEGQEDHYNNLSASK,SQYEVMAEQNRK,LTMQNLNDR,TKFETEQALR,APSIHGGSGGR,GVSVSSAR,ILGATI…
Q99879	HIST1H2BM	Histone H2B type 1-M	358	529	10.02	62.14	4.6234	4.6234	10	14	9	12	68.2	70.6	STITSREIQTAVR,AMGIMNSFVNDIFER,AVTKYTSSK,HAVSEGTKAVTK,QVHPDTGISSK,ESYSVYVYK,KESYSVYVYK,LLLPGELAK,PEPVKSAPVPK	AMGIMNSFVNDIFER,STITSREIQTAVR,AVTKYTSSK,HAVSEGTKAVTK,QVHPDTGISSK,HAVSEGTK,ESYSVYVYK,KESYSVYVYK,LLLPGELAK,PEPVKSAPVPK,VLKQVHPDTGISSK,EIQTAVR
P62807	HIST1H2BC,HIST1H2BD,HIST1H2BE,HIST1H2BF,HIST1H2BG,HIST1H2BI	Histone H2B type 1-C/E/F/G/I	369	555	10.22	51.28	4.6234	4.6234	10	14	9	12	68.2	70.6	STITSREIQTAVR,AMGIMNSFVNDIFER,AVTKYTSSK,HAVSEGTKAVTK,QVHPDTGISSK,ESYSVYVYK,LLLPGELAK,KESYSVYVYK,PEPAKSAPAPK	AMGIMNSFVNDIFER,STITSREIQTAVR,AVTKYTSSK,HAVSEGTKAVTK,HAVSEGTK,QVHPDTGISSK,ESYSVYVYK,VLKQVHPDTGISSK,LLLPGELAK,KESYSVYVYK,PEPAKSAPAPK,EIQTAVR
P58876	HIST1H2BD	Histone H2B type 1-D	357	525	10.22	51.28	3.6416	3.6416	10	14	9	12	68.2	70.6	PEPTKSAPAPK,AMGIMNSFVNDIFER,STITSREIQTAVR,AVTKYTSSK,HAVSEGTKAVTK,QVHPDTGISSK,ESYSVYVYK,KESYSVYVYK,LLLPGELAK	PEPTKSAPAPK,AMGIMNSFVNDIFER,STITSREIQTAVR,AVTKYTSSK,HAVSEGTKAVTK,QVHPDTGISSK,HAVSEGTK,ESYSVYVYK,KESYSVYVYK,VLKQVHPDTGISSK,LLLPGELAK,EIQTAVR
P57053	LOC102724334,H2BFS	Histone H2B type F-S	378	560	10.02	49.76	4.6234	4.6234	10	14	9	12	68.2	70.6	AMGIMNSFVNDIFER,STITSREIQTAVR,HAVSEGTKAVTK,QVHPDTGISSK,ESYSVYVYK,LLLPGELAK,KESYSVYVYK,AVTKYTSAK,PEPAKSAPAPK	STITSREIQTAVR,AMGIMNSFVNDIFER,HAVSEGTKAVTK,QVHPDTGISSK,HAVSEGTK,ESYSVYVYK,KESYSVYVYK,VLKQVHPDTGISSK,LLLPGELAK,AVTKYTSAK,EIQTAVR,PEPAKSAPAPK
Q99877	HIST1H2BN	Histone H2B type 1-N	353	523	8.01	40.96	4.6234	4.6234	10	14	9	12	68.2	70.6	STITSREIQTAVR,PEPSKSAPAPK,AMGIMNSFVNDIFER,AVTKYTSSK,HAVSEGTKAVTK,QVHPDTGISSK,ESYSVYVYK,KESYSVYVYK,LLLPGELAK	STITSREIQTAVR,PEPSKSAPAPK,AMGIMNSFVNDIFER,AVTKYTSSK,HAVSEGTKAVTK,QVHPDTGISSK,HAVSEGTK,ESYSVYVYK,VLKQVHPDTGISSK,KESYSVYVYK,LLLPGELAK,EIQTAVR
Q5QNW6-2	HIST2H2BF	histone H2B type 2-F isoform b	198	530	4.43	39.7	1.9666	3.6416	10	14	9	12	64.1	66.4	AMGIMNSFVNDIFER,STITSREIQTAVR,AVTKYTSSK,HAVSEGTKAVTK,QVHPDTGISSK,PDPAKSAPAPK,ESYSVYVYK,KESYSVYVYK,LLLPGELAK	STITSREIQTAVR,AMGIMNSFVNDIFER,AVTKYTSSK,HAVSEGTKAVTK,HAVSEGTK,QVHPDTGISSK,PDPAKSAPAPK,ESYSVYVYK,KESYSVYVYK,VLKQVHPDTGISSK,LLLPGELAK,EIQTAVR
P04406	GAPDH	glyceraldehyde-3-phosphate dehydrogenase isoform 1	557.67	752.67	11.33	38.823	3.097	3.885	35	56	21	28	61.4	69.5	TVDGPSGK,GKVKVGVNGFGR,IISNASCTTNCLAPLAK,WGDAGAEYVVESTGVFTTMEK,AENGKLVINGNPITIFQERDPSK,VGVNGFGR,AGAHLQGGAK,VPTANVSVVDLTCR,AVGKVIPELNGK,IKWGDAGAEYVVESTGVFTTMEK,VVDLMAHMASKE,LISWYDNEFGYSNR,LTGMAFR,TVDGPSGKLWR,AGAHLQGGAKR,DGRGALQNIIPASTGAAK,AENGKLVINGNPITIFQER,GALQNIIPASTGAAK,VIISAPSADAPMFVMGVNHEK,VVKQASEGPLK,VIPELNGK	IISNASCTTNCLAPLAK,VGVNGFGR,LEKPAKYDDIK,LVINGNPITIFQER,LEKPAKYDDIKK,IKWGDAGAEYVVESTGVFTTMEK,VVDLMAHMASK,RVIISAPSADAPMFVMGVNHEK,DGRGALQNIIPASTGAAK,AENGKLVINGNPITIFQER,GALQNIIPASTGAAK,VIISAPSADAPMFVMGVNHEKYDNSLK,WGDAGAEYVVESTGVFTTMEK,AENGKLVINGNPITIFQERDPSK,AGAHLQGGAK,VIPELNGKLTGMAFR,VPTANVSVVDLTCR,AVGKVIPELNGK,VVDLMAHMASKE,LISWYDNEFGYSNR,VIHDNFGIVEGLMTTVHAITATQK,LVINGNPITIFQERDPSK,LTGMAFR,AGAHLQGGA…
P40926	MDH2	malate dehydrogenase, mitochondrial isoform 1 precursor	1105	930	9.81	22.065	4.6234	3.5374	28	37	25	29	65.6	70.1	IQEAGTEVVK,AKAGAGSATLSMAYAGAR,IFGVTTLDIVR,MISDAIPELK,ANTFVAELK,MISDAIPELKASIK,SQETECTYFSTPLLLGK,AAVKGYLGPEQLPDCLK,VDFPQDQLTALTGR,NSPLVSR,GCDVVVIPAGVPR,ANTFVAELKGLDPAR,TIIPLISQCTPK,FVFSLVDAMNGK,SQETECTYFSTPLLLGKK,KGEDFVK,VSSFEEKMISDAIPELK,KGEDFVKTLK,AGAGSATLSMAYAGAR,GYLGPEQLPDCLK,GIEKNLGIGK,NLGIGKVSSFEEK,VNVPVIGGHAGK,LTLYDIAHTPGVAADLSHIETK,IQEAGTEVVKAK	AKAGAGSATLSMAYAGAR,IQEAGTEVVK,IFGVTTLDIVR,EGVVECSFVK,MISDAIPELK,ANTFVAELK,SQETECTYFSTPLLLGK,AAVKGYLGPEQLPDCLK,VDFPQDQLTALTGR,GLDPARVNVPVIGGHAGK,NSPLVSR,GCDVVVIPAGVPR,ANTFVAELKGLDPAR,HGVYNPNK,TIIPLISQCTPK,GYLGPEQLPDCLKGCDVVVIPAGVPR,FVFSLVDAMNGK,SQETECTYFSTPLLLGKK,KGEDFVK,VSSFEEKMISDAIPELK,VSSFEEK,GYLGPEQLPDCLK,AGAGSATLSMAYAGAR,GIEKNLGIGK,VNVPVIGGHAGK,LTLYDIAHTPGVAADLSHIETK,IQEAGTEVVKAK,FVFSLVDAMNG…
P04075	ALDOA	fructose-bisphosphate aldolase A isoform 1	1113	1614	10.765	19.475	4.9134	5.8687	39	42	31	32	73	80.2	RLQSIGTENTEENRR,CQYVTEK,ALANSLACQGK,IVAPGKGILAADESTGSIAK,GGVVGIKVDK,YASICQQNGIVPIVEPEILPDGDHDLKR,AAQEEYVK,GILAADESTGSIAKR,GILAADESTGSIAK,LQSIGTENTEENR,YASICQQNGIVPIVEPEILPDGDHDLK,QLLLTADDR,LQSIGTENTEENRR,ELSDIAHR,FSHEEIAMATVTALR,IGEHTPSALAIMENANVLAR,PYQYPALTPEQK,YTPSGQAGAAASESLFVSNHAY,AAQEEYVKR,IVAPGKGILAADESTGSIAKR,VDKGVVPLAGTNGETTTQGLDGLSER,ADDGRPFPQVIK,GVVPLAGTNGETTTQGLDGLSER,ALQASALK,SKGGVVGI…	RLQSIGTENTEENRR,CQYVTEK,ALANSLACQGK,IVAPGKGILAADESTGSIAK,GGVVGIKVDK,YASICQQNGIVPIVEPEILPDGDHDLKR,AAQEEYVK,GILAADESTGSIAKR,GILAADESTGSIAK,LQSIGTENTEENR,YASICQQNGIVPIVEPEILPDGDHDLK,QLLLTADDR,LQSIGTENTEENRR,FSHEEIAMATVTALR,ELSDIAHR,IGEHTPSALAIMENANVLAR,PYQYPALTPEQK,YTPSGQAGAAASESLFVSNHAY,AAQEEYVKR,VDKGVVPLAGTNGETTTQGLDGLSER,FSHEEIAMATVTALRR,ADDGRPFPQVIK,GVVPLAGTNGETTTQGLDGLSER,ALQASALK,SKGGVVGIKVDK,…
P00558	PGK1	phosphoglycerate kinase 1	1126	1390	5.31	17.28	5.5285	6.7426	28	40	24	30	64	76.7	ITLPVDFVTADKFDENAK,YAEAVTR,ACANPAAGSVILLENLR,GCITIIGGGDTATCCAK,ALMDEVVK,SLLGKDVLFLKDCVGPEVEK,ALESPERPFLAILGGAK,VKAEPAKIEAFR,FCLDNGAK,KYAEAVTR,VSHVSTGGGASLELLEGK,YSLEPVAVELK,ELNYFAK,WNTEDKVSHVSTGGGASLELLEGK,VLPGVDALSNI,AHSSMVGVNLPQK,VDFNVPMKNNQITNNQR,LGDVYVNDAFGTAHR,FHVEEEGKGK,DCVGPEVEK,AGGFLMKK,IVKDLMSK,DVLFLKDCVGPEVEK,VLNNMEIGTSLFDEEGAK	ITLPVDFVTADKFDENAK,ACANPAAGSVILLENLR,ALMDEVVK,FCLDNGAK,KYAEAVTR,ELNYFAK,WNTEDKVSHVSTGGGASLELLEGK,SVVLMSHLGRPDGVPMPDKYSLEPVAVELK,VDFNVPMKNNQITNNQR,LGDVYVNDAFGTAHR,AGGFLMKK,LTLDKLDVK,YAEAVTR,GCITIIGGGDTATCCAK,SLLGKDVLFLKDCVGPEVEK,ALESPERPFLAILGGAK,VKAEPAKIEAFR,SLLGKDVLFLK,VSHVSTGGGASLELLEGK,NNQITNNQR,YSLEPVAVELK,TGQATVASGIPAGWMGLDCGPESSKK,VDFNVPMK,VLPGVDALSNI,AHSSMVGVNLPQK,FHVEEEGKGK,IVKDLMSK,DCVGP…
P06753-2	TPM3	tropomyosin alpha-3 chain isoform Tpm3.1cy	428	860	1.94	15.57	1.6827	4.1795	12	23	11	20	42.3	66.9	LATALQKLEEAEKAADESER,IQLVEEELDRAQER,KIQVLQQQADDAEERAER,TIDDLEDKLK,IQVLQQQADDAEERAER,MLDQTLLDLNEM,ALKDEEKMELQEIQLK,EQAEAEVASLNRR,AREQAEAEVASLNRR,EQAEAEVASLNR,RIQLVEEELDRAQER	LMDQNLK,LATALQKLEEAEK,LATALQKLEEAEKAADESER,KIQVLQQQADDAEERAER,ALKDEEKMELQEIQLK,KLVIIEGDLERTEER,EQAEAEVASLNRR,HIAEEADRKYEEVAR,LEEAEKAADESERGMK,EQAEAEVASLNR,RIQLVEEELDRAQER,IQLVEEELDR,LQREVEGERR,IQLVEEELDRAQER,TIDDLEDKLK,IQVLQQQADDAEERAER,LEEAEKAADESER,MLDQTLLDLNEM,EAETRAEFAER,AREQAEAEVASLNRR
P63104	YWHAZ	14-3-3 protein zeta/delta	312	890	1.21	14.05	1.3714	3.8697	10	23	8	18	32.2	60	YLAEVAAGDDKK,VVSSIEQKTEGAEK,VVSSIEQKTEGAEKK,SVTEQGAELSNEER,MKGDYYR,NVVGARR,LAEQAERYDDMAACMK,NLLSVAYK	AKLAEQAER,VVSSIEQKTEGAEKK,SVTEQGAELSNEER,YDDMAACMK,FLIPNASQAESK,GIVDQSQQAYQEAFEISKK,MKGDYYR,LAEQAERYDDMAACMK,DNLTLWTSDTQGDEAEAGEGGEN,YLAEVAAGDDKK,DSTLIMQLLR,EMQPTHPIR,VVSSIEQKTEGAEK,SVTEQGAELSNEERNLLSVAYK,YLAEVAAGDDKKGIVDQSQQAYQEAFEISK,LAEQAER,GIVDQSQQAYQEAFEISK,NLLSVAYK
P06733	ENO1	Alpha-enolase isoform 1	1190	875.75	11.165	12.845	3.6648	2.6845	45	55	33	41	66.3	73.9	LNVTEQEKIDK,YGKDATNVGDEGGFAPNILENKEGLELLK,AAVPSGASTGIYEALELR,EIFDSR,EGLELLK,YISPDQLADLYK,VVIGMDVAASEFFR,SGKYDLDFKSPDDPSR,LMIEMDGTENK,YNQLLR,YNQLLRIEEELGSK,LNVTEQEK,IEEELGSK,EIFDSRGNPTVEVDLFTSK,NFRNPLAK,IGAEVYHNLK,TIAPALVSK,IEEELGSKAK,AGYTDKVVIGMDVAASEFFR,LAMQEFMILPVGAANFR,HIADLAGNSEVILPVPAFNVINGGSHAGNK,IDKLMIEMDGTENK,VNQIGSVTESLQACK,GNPTVEVDLFTSK,LAQANGWGVMVSHR,AAVPSGASTGIYEALELRDNDK,KLNVTEQEKIDK…	LNVTEQEKIDK,YGKDATNVGDEGGFAPNILENKEGLELLK,YDLDFK,AAVPSGASTGIYEALELR,EIFDSR,SFIKDYPVVSIEDPFDQDDWGAWQK,YISPDQLADLYK,EGLELLK,VVIGMDVAASEFFR,SGKYDLDFKSPDDPSR,LMIEMDGTENK,YNQLLRIEEELGSK,YNQLLR,FTASAGIQVVGDDLTVTNPKR,LNVTEQEK,AAVPSGASTGIYEALELRDNDKTR,IEEELGSK,EIFDSRGNPTVEVDLFTSK,NFRNPLAK,YDLDFKSPDDPSR,IGAEVYHNLK,TIAPALVSK,SPDDPSR,AGYTDKVVIGMDVAASEFFR,LAMQEFMILPVGAANFR,IDKLMIEMDGTENK,HIADLAGNSEVILPVPAFNV…
P05783	KRT18	Keratin, type I cytoskeletal 18	1056.5	698.5	10.775	12.323	3.6474	2.5335	43	53	32	36	68.1	74.1	AQYDELARK,IVLQIDNAR,DWSHYFK,AQIFANTVDNAR,LASYLDR,RLLEDGEDFNLGDALDSSNSMQTIQK,VKLEAEIATYR,RIVDGKVVSETNDTK,STFSTNYR,NHEEEVKGLQAQIASSGLTVEVDAPK,LAADDFR,LLEDGEDFNLGDALDSSNSMQTIQK,YETELAMR,KVIDDTNITR,QAQEYEALLNIK,GGMGSGGLATGIAGGLAGMGGIQNEK,VVSETNDTK,TVQSLEIDLDSMR,GGMGSGGLATGIAGGLAGMGGIQNEKETMQSLNDR,ASLENSLR,QSVENDIHGLRK,RTVQSLEIDLDSMR,IMADIRAQYDELAR,ASLENSLREVEAR,QSVENDIHGLR,VIDDTNITR,NREELDKYWSQQIEEST…	AQYDELARK,IVLQIDNAR,DWSHYFK,AQIFANTVDNAR,LASYLDR,IREHLEK,RLLEDGEDFNLGDALDSSNSMQTIQK,VKLEAEIATYR,RIVDGKVVSETNDTK,STFSTNYR,NHEEEVKGLQAQIASSGLTVEVDAPK,LAADDFR,LLEDGEDFNLGDALDSSNSMQTIQK,YETELAMR,KVIDDTNITR,GGMGSGGLATGIAGGLAGMGGIQNEK,QAQEYEALLNIK,VVSETNDTK,TVQSLEIDLDSMR,GGMGSGGLATGIAGGLAGMGGIQNEKETMQSLNDR,ASLENSLR,QSVENDIHGLRK,LQLETEIEALKEELLFMKK,RTVQSLEIDLDSMR,IVDGKVVSETNDTK,YWSQQIEESTTVVTTQSAEVGAAET…
P31946-2	YWHAB	Isoform Short of 14-3-3 protein beta/alpha	41	790	0.25	12.31	0.35936	2.9811	2	23	1	16	6.5	45.4	LAEQAERYDDMAAAMK	AVTEQGHELSNEERNLLSVAYK,QTTVSNSQQAYQEAFEISKK,AKLAEQAER,VISSIEQKTERNEK,LAEQAERYDDMAAAMK,YDDMAAAMK,YLSEVASGDNKQTTVSNSQQAYQEAFEISK,MKGDYFR,DSTLIMQLLR,EMQPTHPIR,VISSIEQK,LAEQAER,YLSEVASGDNK,VISSIEQKTER,NLLSVAYK,AVTEQGHELSNEER
Q06830	PRDX1	peroxiredoxin-1	184	609	1.905	11.42	2.4175	5.8129	10	15	9	13	47.2	52.2	QGGLGPMNIPLVSDPKR,SVDETLR,TIAQDYGVLK,ATAVMPDGQFKDISLSDYK,GLFIIDDKGILR,TIAQDYGVLKADEGISFR,ATAVMPDGQFK,LVQAFQFTDK,QITVNDLPVGR	TIAQDYGVLK,IGHPAPNFK,ADEGISFR,KQGGLGPMNIPLVSDPKR,GLFIIDDKGILR,ATAVMPDGQFK,QITVNDLPVGR,QGGLGPMNIPLVSDPKR,SVDETLR,ATAVMPDGQFKDISLSDYK,QGGLGPMNIPLVSDPK,TIAQDYGVLKADEGISFR,LVQAFQFTDK
P08729	KRT7	Keratin, type II cytoskeletal 7	821.33	1101.3	7.8333	9.73	2.4302	3.5831	48	48	38	38	66.9	65.2	VELEAKVDALNDEINFLR,FASFIDK,EYQELMSVK,VRQEESEQIKTLNNK,FASFIDKVR,NEISEMNR,LPDIFEAQIAGLR,AEAEAWYQTK,AKQEELEAALQR,NTRNEISEMNR,AKLEAAIAEAEER,AQYEEMAK,VDALNDEINFLR,EVTINQSLLAPLR,LLEGEESR,KLLEGEESR,SMQDVVEDFK,FLEQQNK,LDADPSLQR,VRQEESEQIK,QLREYQELMSVK,DVDAAYMSK,LALDIEIATYR,WTLLQEQK,LEAAIAEAEERGELALK,TAAENEFVVLKK,FLEQQNKLLETK,GQLEALQVDGGR,EVTINQSLLAPLRLDADPSLQR,AKLEAAIAEAEERGELALK,SLDLDGIIAEVK,TAAENEFVVLK…	VELEAKVDALNDEINFLR,FASFIDK,AEAEAWYQTKFETLQAQAGK,EYQELMSVK,VRQEESEQIKTLNNK,FASFIDKVR,NEISEMNR,LPDIFEAQIAGLR,AEAEAWYQTK,AKQEELEAALQR,NTRNEISEMNR,AKLEAAIAEAEER,AQYEEMAK,VDALNDEINFLR,EVTINQSLLAPLR,LLEGEESR,KLLEGEESR,FLEQQNK,SMQDVVEDFK,VRQEESEQIK,LDADPSLQR,KDVDAAYMSK,DVDAAYMSK,LALDIEIATYR,WTLLQEQK,LEAAIAEAEERGELALK,TAAENEFVVLKK,GQLEALQVDGGR,EVTINQSLLAPLRLDADPSLQR,AKLEAAIAEAEERGELALK,SLDLDGIIAEVK,TAAEN…
P60174-1	TPI1	Triosephosphate isomerase isoform 1	433.5	781	1.7	9.48	2.9811	6.3208	10	20	10	16	46.9	79.1	VIADNVKDWSK,TATPQQAQEVHEKLR,TATPQQAQEVHEK,FFVGGNWK,VPADTEVVCAPPTAYIDFAR,VVLAYEPVWAIGTGK,SNVSDAVAQSTR,IIYGGSVTGATCK,HVFGESDELIGQK,IAVAAQNCYK	DCGATWVVLGHSER,VIADNVKDWSK,TATPQQAQEVHEKLR,VVLAYEPVWAIGTGK,IIYGGSVTGATCK,HVFGESDELIGQK,TATPQQAQEVHEK,QSLGELIGTLNAAK,FFVGGNWK,VPADTEVVCAPPTAYIDFAR,SNVSDAVAQSTR,VAHALAEGLGVIACIGEK,LDEREAGITEK,VVFEQTK,VTNGAFTGEISPGMIK,IAVAAQNCYK
Q71U36-2	TUBA1A	tubulin alpha-1A chain isoform 2	548.5	1082	2.81	9.17	2.7549	5.4495	23	28	17	20	53.8	56	NLDIERPTYTNLNR,QLFHPEQLITGKEDAANNYAR,AFVHWYVGEGMEEGEFSEAR,TIQFVDWCPTGFK,AVFVDLEPTVIDEVR,IHFPLATYAPVISAEK,AVCMLSNTTAIAEAWAR,LSVDYGK,LDHKFDLMYAK,YMACCLLYR,AYHEQLSVAEITNACFEPANQMVK,EIIDLVLDR,VGINYQPPTVVPGGDLAK,EDAANNYAR,DVNAAIATIK,TIGGGDDSFNTFFSETGAGK,QLFHPEQLITGK	EDMAALEK,FDLMYAK,QLFHPEQLITGKEDAANNYAR,NLDIERPTYTNLNR,AFVHWYVGEGMEEGEFSEAR,TIQFVDWCPTGFK,AVFVDLEPTVIDEVR,IHFPLATYAPVISAEK,LSVDYGK,AVCMLSNTTAIAEAWAR,LDHKFDLMYAK,YMACCLLYR,LSVDYGKK,AYHEQLSVAEITNACFEPANQMVK,EIIDLVLDR,VGINYQPPTVVPGGDLAK,EDAANNYAR,DVNAAIATIK,TIGGGDDSFNTFFSETGAGK,QLFHPEQLITGK
P07437	TUBB	tubulin beta chain isoform b	639	1105	4.8	8.59	2.3951	5.2303	32	44	19	26	48.4	75.2	MSMKEVDEQMLNVQNK,NSSYFVEWIPNNVK,ISVYYNEATGGKYVPR,TAVCDIPPR,FPGQLNADLR,AILVDLEPGTMDSVR,LHFFMPGFAPLTSR,EVDEQMLNVQNK,ISVYYNEATGGK,GHYTEGAELVDSVLDVVRK,ISEQFTAMFR,EIVHIQAGQCGNQIGAK,ALTVPELTQQVFDAK,GHYTEGAELVDSVLDVVR,FWEVISDEHGIDPTGTYHGDSDLQLDR,NMMAACDPR,MREIVHIQAGQCGNQIGAK,IMNTFSVVPSPK,LAVNMVPFPR	ISVYYNEATGGKYVPR,TAVCDIPPR,LHFFMPGFAPLTSR,AILVDLEPGTMDSVR,FPGQLNADLR,EVDEQMLNVQNK,ISVYYNEATGGK,LTTPTYGDLNHLVSATMSGVTTCLR,GHYTEGAELVDSVLDVVRK,ALTVPELTQQVFDAK,MREIVHIQAGQCGNQIGAK,YLTVAAVFR,MSMKEVDEQMLNVQNK,NSSYFVEWIPNNVK,KLAVNMVPFPR,SGPFGQIFRPDNFVFGQSGAGNNWAK,ISEQFTAMFR,EIVHIQAGQCGNQIGAK,EAESCDCLQGFQLTHSLGGGTGSGMGTLLISK,MAVTFIGNSTAIQELFKR,GHYTEGAELVDSVLDVVR,NMMAACDPR,FWEVISDEHGIDPTGTYHGDSDLQLDR,IRE…
P68371	TUBB4B	Tubulin beta-4B chain	589.5	1058.5	3.545	7.01	2.2984	5.2303	32	44	18	25	42.2	73.9	MSMKEVDEQMLNVQNK,EIVHLQAGQCGNQIGAK,NSSYFVEWIPNNVK,TAVCDIPPR,FPGQLNADLR,LHFFMPGFAPLTSR,EVDEQMLNVQNK,MREIVHLQAGQCGNQIGAK,ISEQFTAMFR,GHYTEGAELVDSVLDVVRK,INVYYNEATGGK,GHYTEGAELVDSVLDVVR,AVLVDLEPGTMDSVR,INVYYNEATGGKYVPR,NMMAACDPR,ALTVPELTQQMFDAK,LAVNMVPFPR,IMNTFSVVPSPK	YLTVAAVFR,EIVHLQAGQCGNQIGAK,MSMKEVDEQMLNVQNK,FWEVISDEHGIDPTGTYHGDSDLQLER,NSSYFVEWIPNNVK,TAVCDIPPR,LHFFMPGFAPLTSR,FPGQLNADLR,KLAVNMVPFPR,EVDEQMLNVQNK,SGPFGQIFRPDNFVFGQSGAGNNWAK,MREIVHLQAGQCGNQIGAK,LTTPTYGDLNHLVSATMSGVTTCLR,GHYTEGAELVDSVLDVVRK,ISEQFTAMFR,INVYYNEATGGK,EAESCDCLQGFQLTHSLGGGTGSGMGTLLISK,AVLVDLEPGTMDSVR,MSATFIGNSTAIQELFK,GHYTEGAELVDSVLDVVR,NMMAACDPR,IREEYPDR,IMNTFSVVPSPK,LAVNMVPFPR,ALTV…
P11142	HSPA8	heat shock cognate 71 kDa protein isoform 1	1254.5	1150.7	5.225	6.8867	2.4425	2.2952	51	55	35	37	50.4	50.6	ITITNDKGR,MVNHFIAEFK,LSKEDIER,LIGDAAKNQVAMNPTNTVFDAK,EIAEAYLGK,QATKDAGTIAGLNVLR,TVTNAVVTVPAYFNDSQR,LYQSAGGMPGGMPGGFPGGGAPPSGGASSGPTIEEVD,DAGTIAGLNVLR,VCNPIITK,STAGDTHLGGEDFDNR,ARFEELNADLFR,MKEIAEAYLGK,SFYPEEVSSMVLTK,VQVEYK,DAKLDKSQIHDIVLVGGSTR,LLQDFFNGKELNK,IINEPTAAAIAYGLDK,FEELNADLFR,ELEKVCNPIITK,GTLDPVEK,QTQTFTTYSDNQPGVLIQVYEGER,ARFEELNADLFRGTLDPVEK,NQVAMNPTNTVFDAK,FEELNADLFRGTLDPVEK,TTPSYVAFTD…	NQVAMNPTNTVFDAKR,ITITNDKGR,LSKEDIER,MVNHFIAEFK,QATKDAGTIAGLNVLR,EIAEAYLGK,TVTNAVVTVPAYFNDSQR,LYQSAGGMPGGMPGGFPGGGAPPSGGASSGPTIEEVD,FDDAVVQSDMK,VCNPIITK,STAGDTHLGGEDFDNR,DAGTIAGLNVLR,RFDDAVVQSDMK,ARFEELNADLFR,MKEIAEAYLGK,SFYPEEVSSMVLTK,VQVEYK,MVNHFIAEFKR,DAKLDKSQIHDIVLVGGSTR,LLQDFFNGKELNK,IINEPTAAAIAYGLDK,FEELNADLFR,ELEKVCNPIITK,GTLDPVEK,QTQTFTTYSDNQPGVLIQVYEGER,NQVAMNPTNTVFDAK,ARFEELNADLFRGTLDPVE…
P08238	HSP90AB1	heat shock protein HSP 90-beta isoform a	1419	1206.3	5.02	6.6833	3.0306	2.5755	60	72	48	56	57.7	61.4	HFSVEGQLEFR,LGIHEDSTNR,FENLCK,ADHGEPIGR,GVVDSEDLPLNISR,HSQFIGYPITLYLEKER,TKPIWTRNPDDITQEEYGEFYK,HLEINPDHPIVETLR,EQVANSAFVER,YIDQEELNK,SIYYITGESKEQVANSAFVER,ELISNASDALDK,AQALRDNSTMGYMMAK,RAPFDLFENK,GFEVVYMTEPIDEYCVQQLK,VILHLKEDQTEYLEER,TLTLVDTGIGMTK,EDQTEYLEERR,EMLQQSK,HNDDEQYAWESSAGGSFTVR,CLELFSELAEDKENYKK,AKFENLCK,GVVDSEDLPLNISREMLQQSK,IMKAQALR,YHTSQSGDEMTSLSEYVSR,EDQTEYLEER,NPDDITQEEYGEFYK,SIYY…	TKPIWTR,LGIHEDSTNR,FENLCK,ADHGEPIGR,HSQFIGYPITLYLEKER,TKPIWTRNPDDITQEEYGEFYK,HLEINPDHPIVETLR,EQVANSAFVER,SIYYITGESKEQVANSAFVER,YESLTDPSKLDSGKELK,RLSELLR,AQALRDNSTMGYMMAK,ELISNASDALDK,RAPFDLFENK,TLTLVDTGIGMTK,ELKIDIIPNPQER,RGFEVVYMTEPIDEYCVQQLK,EMLQQSK,AKFENLCK,CLELFSELAEDKENYKK,GVVDSEDLPLNISREMLQQSK,IMKAQALR,YHTSQSGDEMTSLSEYVSR,EDQTEYLEER,APFDLFENKK,KHLEINPDHPIVETLR,ALLFIPR,HSQFIGYPITLYLEK,ADLINN…
P37802-2	TAGLN2	transgelin-2 isoform a	290	562	1.77	6.65	1.1544	2.4145	9	17	7	11	26.8	46.3	NFSDNQLQEGKNVIGLQMGTNR,DDGLFSGDPNWFPK,NFSDNQLQEGK,NVIGLQMGTNR,GASQAGMTGYGMPR,DDGLFSGDPNWFPKK,GPAYGLSR	TLMNLGGLAVAR,NFSDNQLQEGKNVIGLQMGTNR,EVQQKIEK,DDGLFSGDPNWFPK,NFSDNQLQEGK,NVIGLQMGTNR,GASQAGMTGYGMPR,QMEQISQFLQAAER,DDGLFSGDPNWFPKK,IQASTMAFK,GPAYGLSR
P07237	P4HB	protein disulfide-isomerase precursor	943	1302	2.6	6.42	2.7276	4.1795	24	33	21	29	45	54.5	EADDIVNWLK,YKPESEELTAER,YQLDKDGVVLFKK,TVIDYNGER,MDSTANEVEAVK,LAKVDATEESDLAQQYGVR,NFEDVAFDEK,LKAEGSEIR,YQLDKDGVVLFK,ILFIFIDSDHTDNQR,IKPHLMSQELPEDWDKQPVK,LITLEEEMTK,VDATEESDLAQQYGVR,TLDGFKK,SNFAEALAAHK,LGETYKDHENIVIAK,ILEFFGLK,HNQLPLVIEFTEQTAPK,NNFEGEVTKENLLDFIK,ITEFCHR,MDSTANEVEAVKVHSFPTLK	FFRNGDTASPK,YQLDKDGVVLFKK,SVSDYDGK,TVIDYNGER,NFEDVAFDEK,LKAEGSEIR,NFEDVAFDEKK,FDEGRNNFEGEVTKENLLDFIK,IKPHLMSQELPEDWDKQPVK,LITLEEEMTK,ALAPEYAK,ENLLDFIK,VDATEESDLAQQYGVR,SNFAEALAAHK,TLDGFKK,LGETYKDHENIVIAK,ILEFFGLK,IFGGEIK,ITEFCHR,MDSTANEVEAVKVHSFPTLK,EADDIVNWLK,YKPESEELTAER,MDSTANEVEAVK,LAKVDATEESDLAQQYGVR,YQLDKDGVVLFK,ILFIFIDSDHTDNQR,NNFEGEVTKENLLDFIK,HNQLPLVIEFTEQTAPK,FFPASADR
P68366-2	TUBA4A	tubulin alpha-4A chain isoform 2	749	870	3.78	6.07	3.1596	3.6416	19	25	14	17	42.7	43.6	SIQFVDWCPTGFK,NLDIERPTYTNLNR,QLFHPEQLITGKEDAANNYAR,AFVHWYVGEGMEEGEFSEAR,IHFPLATYAPVISAEK,AVCMLSNTTAIAEAWAR,LSVDYGK,LDHKFDLMYAK,YMACCLLYR,AYHEQLSVAEITNACFEPANQMVK,VGINYQPPTVVPGGDLAK,AVFVDLEPTVIDEIR,EDAANNYAR,QLFHPEQLITGK	EDMAALEK,FDLMYAK,SIQFVDWCPTGFK,NLDIERPTYTNLNR,QLFHPEQLITGKEDAANNYAR,AFVHWYVGEGMEEGEFSEAR,IHFPLATYAPVISAEK,LSVDYGK,AVCMLSNTTAIAEAWAR,LDHKFDLMYAK,YMACCLLYR,DVNAAIAAIK,LSVDYGKK,AYHEQLSVAEITNACFEPANQMVK,VGINYQPPTVVPGGDLAK,EDAANNYAR,QLFHPEQLITGK
P14618	PKM	pyruvate kinase PKM isoform a	1006.5	924.33	4.08	5.9767	1.9864	2.0296	36	48	31	37	63	71.1	KGVNLPGAAVDLPAVSEK,ITLDNAYMEK,GDLGIEIPAEK,TATESFASDPILYRPVAVALDTK,GVNLPGAAVDLPAVSEK,CDENILWLDYKNICK,QKGADFLVTEVENGGSLGSK,GADFLVTEVENGGSLGSKK,KGVNLPGAAVDLPAVSEKDIQDLK,GIFPVLCKDPVQEAWAEDVDLR,MQHLIAR,RFDEILEASDGIMVAR,LAPITSDPTEATAVGAVEASFK,CCSGAIIVLTK,IYVDDGLISLQVK,AEGSDVANAVLDGADCIMLSGETAKGDYPLEAVR,GSGTAEVELK,EAEAAIYHLQLFEELR,CDENILWLDYK,AGKPVICATQMLESMIK,GDYPLEAVR,AEGSDVANAVLDGADCIMLSGETAK,LNFSHGT…	KGVNLPGAAVDLPAVSEK,ITLDNAYMEK,TATESFASDPILYRPVAVALDTKGPEIR,VNFAMNVGK,GIFPVLCK,TATESFASDPILYRPVAVALDTK,GDLGIEIPAEK,FGVEQDVDMVFASFIR,GVNLPGAAVDLPAVSEK,QKGADFLVTEVENGGSLGSK,GADFLVTEVENGGSLGSKK,KGVNLPGAAVDLPAVSEKDIQDLK,GVNLPGAAVDLPAVSEKDIQDLK,GIFPVLCKDPVQEAWAEDVDLR,MQHLIAR,RFDEILEASDGIMVAR,LAPITSDPTEATAVGAVEASFK,CCSGAIIVLTK,AEGSDVANAVLDGADCIMLSGETAKGDYPLEAVR,IYVDDGLISLQVK,EAEAAIYHLQLFEELR,GSGTAEVELK,…
P60709	ACTB	Actin, cytoplasmic 1	724.75	617.67	12.933	5.62	2.6147	2.2064	50	38	30	25	71.4	59.2	AGFAGDDAPR,LCYVALDFEQEMATAASSSSLEK,CPEALFQPSFLGMESCGIHETTFNSIMK,YPIEHGIVTNWDDMEK,SYELPDGQVITIGNERFR,QEYDESGPSIVHR,IIAPPER,SYELPDGQVITIGNER,HQGVMVGMGQKDSYVGDEAQSK,CDVDIR,TTGIVMDSGDGVTHTVPIYEGYALPHAILR,KDLYANTVLSGGTTMYPGIADR,IKIIAPPERK,QEYDESGPSIVHRK,MQKEITALAPSTMK,HQGVMVGMGQKDSYVGDEAQSKR,GYSFTTTAER,LDLAGRDLTDYLMK,DSYVGDEAQSK,DLYANTVLSGGTTMYPGIADR,RGILTLK,HQGVMVGMGQK,CDVDIRK,EITALAPSTMK,IIAPPERK,DS…	AGFAGDDAPR,LCYVALDFEQEMATAASSSSLEK,QEYDESGPSIVHR,IIAPPER,SYELPDGQVITIGNER,HQGVMVGMGQKDSYVGDEAQSK,TTGIVMDSGDGVTHTVPIYEGYALPHAILR,KDLYANTVLSGGTTMYPGIADR,IKIIAPPERK,QEYDESGPSIVHRK,HQGVMVGMGQKDSYVGDEAQSKR,MQKEITALAPSTMK,GYSFTTTAER,LDLAGRDLTDYLMK,DSYVGDEAQSK,DLYANTVLSGGTTMYPGIADR,RGILTLK,CDVDIRK,HQGVMVGMGQK,EITALAPSTMK,DSYVGDEAQSKR,VAPEEHPVLLTEAPLNPK,DLTDYLMK,EKLCYVALDFEQEMATAASSSSLEK,GYSFTTTAEREIVR
P12004	PCNA	proliferating cell nuclear antigen	296	670	1.14	5.31	1.5809	6.627	7	20	6	15	26	64.7	DLSHIGDAVVISCAKDGVK,FSASGELGNGNIK,YLNFFTK,SEGFDTYR,MPSGEFAR,YYLAPKIEDEEGS	LVQGSILKK,SEGFDTYR,MPSGEFAR,YYLAPKIEDEEGS,LSQTSNVDKEEEAVTIEMNEPVQLTFALR,VSDYEMKLMDLDVEQLGIPEQEYSCVVK,NLAMGVNLTSMSK,AEDNADTLALVFEAPNQEK,FSASGELGNGNIK,VSDYEMK,CAGNEDIITLR,LMDLDVEQLGIPEQEYSCVVK,YLNFFTK,IADMGHLK,SEGFDTYRCDR
Q02790	FKBP4	Peptidyl-prolyl cis-trans isomerase FKBP4	736	1161	1.67	5.3	2.535	4.1248	17	27	16	24	48.3	65.7	VLQLYPNNK,AKESWEMNSEEKLEQSTIVK,EGTGTEMPMIGDR,GEAHLAVNDFELAR,TQLAVCQQR,FEIGEGENLDLPYGLER,LQAFSAAIESCNK,ALELDSNNEK,GEHSIVYLKPSYAFGSVGK,SNTAGSQSQVETEA,QDEGVLK,AWDIAIATMK,TAEEMKATESGAQSAPLPMEGVDISPK,ELRFEIGEGENLDLPYGLER,IVSWLEYESSFSNEEAQK,AEASSGDHPTDTEMKEEQK	VLQLYPNNK,AKESWEMNSEEKLEQSTIVK,QALLQYK,EGTGTEMPMIGDR,TQLAVCQQR,VGEVCHITCKPEYAYGSAGSPPK,YKQALLQYK,VFVHYTGWLLDGTK,FEIGEGENLDLPYGLER,GEGYAKPNEGAIVEVALEGYYK,LQAFSAAIESCNK,RGEAHLAVNDFELAR,ALELDSNNEK,AKAEASSGDHPTDTEMKEEQK,GEHSIVYLKPSYAFGSVGK,SNTAGSQSQVETEA,QDEGVLK,AWDIAIATMK,GEGYAKPNEGAIVEVALEGYYKDK,FDSSLDR,ELRFEIGEGENLDLPYGLER,TAEEMKATESGAQSAPLPMEGVDISPK,IVSWLEYESSFSNEEAQK,AEASSGDHPTDTEMKEEQK
P10809	HSPD1	60 kDa heat shock protein, mitochondrial	606.33	935.33	1.8433	5.09	1.4591	2.1635	32	51	28	37	54.7	69.8	TVIIEQSWGSPK,VGGTSDVEVNEKKDR,IGIEIIKR,IQEIIEQLDVTTSEYEKEK,LSDGVAVLK,VGGTSDVEVNEK,VGGTSDVEVNEKK,GYISPYFINTSK,TLNDELEIIEGMKFDR,GQKCEFQDAYVLLSEK,CIPALDSLTPANEDQK,AAVEEGIVLGGGCALLR,QSKPVTTPEEIAQVATISANGDKEIGNIISDAMKK,VTDALNATR,TLKIPAMTIAK,TLNDELEIIEGMK,NAGVEGSLIVEK,IQEIIEQLDVTTSEYEKEKLNER,VGEVIVTK,VTKDGVTVAK,VGEVIVTKDDAMLLK,CEFQDAYVLLSEKK,GANPVEIR,ISSIQSIVPALEIANAHR,APGFGDNR,VGLQVVAVK,SIDLKDKYK,LVQDV…	TVIIEQSWGSPK,VGGTSDVEVNEKKDR,IGIEIIKR,APGFGDNRK,IQEIIEQLDVTTSEYEKEK,LSDGVAVLK,IMQSSSEVGYDAMAGDFVNMVEK,CEFQDAYVLLSEK,VGGTSDVEVNEK,VGGTSDVEVNEKK,GYISPYFINTSK,TLNDELEIIEGMKFDR,GQKCEFQDAYVLLSEK,CIPALDSLTPANEDQK,AAVEEGIVLGGGCALLR,IGIEIIK,QSKPVTTPEEIAQVATISANGDKEIGNIISDAMKK,VTDALNATR,GVMLAVDAVIAELKK,TLKIPAMTIAK,TLNDELEIIEGMK,DMAIATGGAVFGEEGLTLNLEDVQPHDLGK,NAGVEGSLIVEK,IQEIIEQLDVTTSEYEKEKLNER,VGEVIVTK,V…
P62736	ACTA2	Actin, aortic smooth muscle	786	651	6.04	5.06	1.7826	1.7826	27	26	17	15	29.4	28.9	AGFAGDDAPR,RGILTLK,SYELPDGQVITIGNERFR,YPIEHGIITNWDDMEK,IIAPPER,SYELPDGQVITIGNER,HQGVMVGMGQK,HQGVMVGMGQKDSYVGDEAQSK,EITALAPSTMK,IIAPPERK,DSYVGDEAQSKR,IKIIAPPERK,DLTDYLMK,HQGVMVGMGQKDSYVGDEAQSKR,MQKEITALAPSTMK,LDLAGRDLTDYLMK,DSYVGDEAQSK	AGFAGDDAPR,RGILTLK,YPIEHGIITNWDDMEK,SYELPDGQVITIGNER,IIAPPER,HQGVMVGMGQK,HQGVMVGMGQKDSYVGDEAQSK,EITALAPSTMK,DSYVGDEAQSKR,IKIIAPPERK,DLTDYLMK,HQGVMVGMGQKDSYVGDEAQSKR,MQKEITALAPSTMK,LDLAGRDLTDYLMK,DSYVGDEAQSK
P07355-2	ANXA2	Annexin A2 isoform 1	738	1115	2.78	5.05	2.8312	4.109	16	24	15	23	52.1	58.8	LSLEGDHSTPPSAYGSVK,GTDVPKWISIMTER,TDLEKDIISDTSGDFRK,SNAQRQDIAFAYQR,LMVALAK,TDLEKDIISDTSGDFR,ALLYLCGGDD,RAEDGSVIDYELIDQDARDLYDAGVK,GLGTDEDSLIEIICSR,RAEDGSVIDYELIDQDAR,TPAQYDASELKASMK,QDIAFAYQR,GVDEVTIVNILTNR,SLYYYIQQDTKGDYQK,AYTNFDAERDALNIETAIK	LSLEGDHSTPPSAYGSVK,DALNIETAIK,SLYYYIQQDTK,SNAQRQDIAFAYQR,TDLEKDIISDTSGDFRK,LMVALAK,TNQELQEINR,ALLYLCGGDD,TDLEKDIISDTSGDFR,SEVDMLK,RAEDGSVIDYELIDQDARDLYDAGVK,AEDGSVIDYELIDQDAR,GLGTDEDSLIEIICSR,RAEDGSVIDYELIDQDAR,TPAQYDASELKASMK,WISIMTER,TPAQYDASELK,QDIAFAYQR,DLYDAGVK,GVDEVTIVNILTNR,SYSPYDMLESIRK,AYTNFDAERDALNIETAIK,SLYYYIQQDTKGDYQK
P23396	RPS3	40S ribosomal protein S3 isoform 1	332	463.5	1.27	4.905	1.6367	3.1952	8	21	8	18	37	74.8	FIMESGAKGCEVVVSGK,ELAEDGYSGVEVR,IMLPWDPTGK,GGKPEPPAMPQPVPTA,LLGGLAVR,GLCAIAQAESLR,GCEVVVSGK,FGFPEGSVELYAEK	DEILPTTPISEQK,FIMESGAKGCEVVVSGK,ELAEDGYSGVEVR,IRELTAVVQK,IMLPWDPTGK,GGKPEPPAMPQPVPTA,LLGGLAVR,TEIIILATR,FIMESGAK,AELNEFLTR,FVADGIFK,KPLPDHVSIVEPKDEILPTTPISEQK,FVDGLMIHSGDPVNYYVDTAVR,ACYGVLR,GLCAIAQAESLR,GCEVVVSGK,RACYGVLR,FGFPEGSVELYAEK
P67936	TPM4	tropomyosin alpha-4 chain isoform Tpm4.2cy	117	539	0.39	4.81	0.77828	2.9811	4	14	4	14	22.1	51.6	LATALQKLEEAEKAADESER,IQLVEEELDRAQER,IQALQQQADEAEDRAQGLQR,RIQLVEEELDRAQER	LATALQKLEEAEK,LATALQKLEEAEKAADESER,KIQALQQQADEAEDRAQGLQR,HIAEEADRKYEEVAR,LEEAEKAADESERGMK,KLVILEGELERAEER,RIQLVEEELDRAQER,IQLVEEELDR,CGDLEEELKNVTNNLK,IQLVEEELDRAQER,EKAEGDVAALNRR,LEEAEKAADESER,EAETRAEFAER,IQALQQQADEAEDRAQGLQR
P68363	TUBA1B	Tubulin alpha-1B chain	929	842.5	4.45	4.595	4.7797	3.895	22	30	17	21	49.6	52.7	SIQFVDWCPTGFK,QLFHPEQLITGKEDAANNYAR,NLDIERPTYTNLNR,AFVHWYVGEGMEEGEFSEAR,AVFVDLEPTVIDEVR,IHFPLATYAPVISAEK,AVCMLSNTTAIAEAWAR,LSVDYGK,LDHKFDLMYAK,YMACCLLYR,AYHEQLSVAEITNACFEPANQMVK,EIIDLVLDR,VGINYQPPTVVPGGDLAK,EDAANNYAR,DVNAAIATIK,TIGGGDDSFNTFFSETGAGK,QLFHPEQLITGK	EDMAALEK,FDLMYAK,SIQFVDWCPTGFK,NLDIERPTYTNLNR,QLFHPEQLITGKEDAANNYAR,AVFVDLEPTVIDEVRTGTYR,AFVHWYVGEGMEEGEFSEAR,AVFVDLEPTVIDEVR,IHFPLATYAPVISAEK,LSVDYGK,AVCMLSNTTAIAEAWAR,LDHKFDLMYAK,YMACCLLYR,LSVDYGKK,AYHEQLSVAEITNACFEPANQMVK,EIIDLVLDR,VGINYQPPTVVPGGDLAK,EDAANNYAR,DVNAAIATIK,TIGGGDDSFNTFFSETGAGK,QLFHPEQLITGK
P62258	YWHAE	14-3-3 protein epsilon	195	580	0.71	4.59	0.89574	3.0842	5	16	4	12	19.2	49.4	EAAENSLVAYK,VAGMDVELTVEER,LAEQAERYDEMVESMKK,NLLSVAYK	DNLTLWTSDMQGDGEEQNKEALQDVEDENQ,DSTLIMQLLR,EAAENSLVAYK,VAGMDVELTVEER,QMVETELK,LAEQAERYDEMVESMK,LAEQAERYDEMVESMKK,LAEQAER,YLAEFATGNDRK,AASDIAMTELPPTHPIR,NLLSVAYK,KEAAENSLVAYK
P07900-2	HSP90AA1	heat shock protein HSP 90-alpha isoform 1	1140.5	1139.3	2.45	4.2533	1.8488	1.6712	54	72	44	56	48.4	51.9	HFSVEGQLEFR,FENLCK,GVVDSEDLPLNISR,HGLEVIYMIEPIDEYCVQQLK,ALLFVPR,RAPFDLFENR,ELISNSSDALDKIR,YYTSASGDEMVSLKDYCTR,LGIHEDSQNR,FYEQFSK,YIDQEELNK,LGLGIDEDDPTADDTSAAVTEEMPPLEGDDDTSRMEEVD,VTVITKHNDDEQYAWESSAGGSFTVR,DNSTMGYMAAK,AQALRDNSTMGYMAAK,VILHLKEDQTEYLEER,EDQTEYLEERR,EMLQQSK,ELISNSSDALDK,LVTSPCCIVTSTYGWTANMER,HNDDEQYAWESSAGGSFTVR,IMKAQALR,GVVDSEDLPLNISREMLQQSK,HIYYITGETKDQVANSAFVER,EDQTEYLEER,HGLEVIY…	TKPIWTR,FENLCK,HGLEVIYMIEPIDEYCVQQLK,ALLFVPR,HSQFIGYPITLFVEK,RAPFDLFENR,ELISNSSDALDKIR,LGIHEDSQNR,LGLGIDEDDPTADDTSAAVTEEMPPLEGDDDTSRMEEVD,DNSTMGYMAAK,RAPFDLFENRK,EMLQQSK,ELISNSSDALDK,KTKFENLCK,IMKAQALR,GVVDSEDLPLNISREMLQQSK,EDQTEYLEER,YYTSASGDEMVSLK,LDSGKELHINLIPNKQDR,HGLEVIYMIEPIDEYCVQQLKEFEGK,ADLINNLGTIAK,DQVANSAFVER,KVEKVVVSNR,LGIHEDSQNRK,APFDLFENR,TKPIWTRNPDDITNEEYGEFYK,KHLEINPDHSIIETLR,EKYID…
P23528	CFL1	Cofilin-1	149	437	0.39	4.22	0.51991	4.3367	2	12	2	11	15	63.8	LGGSAVISLEGKPL,YALYDATYETK	LGGSAVISLEGKPL,KAVLFCLSEDKK,AVLFCLSEDKK,KSSTPEEVKK,YALYDATYETK,NIILEEGKEILVGDVGQTVDDPYATFVK,YALYDATYETKESK,MIYASSKDAIK,VFNDMKVR,MLPDKDCR,SSTPEEVKKR
P14625	HSP90B1	endoplasmin precursor	1335	964	1.83	3.77	2.3322	1.4762	29	40	27	38	40.4	46.8	KGYEVIYLTEPVDEYCIQALPEFDGKR,IADDKYNDTFWKEFGTNIK,EAESSPFVER,LIINSLYK,GYEVIYLTEPVDEYCIQALPEFDGKR,AYGDRIER,VFITDDFHDMMPK,ELISNASDALDK,NLLHVTDTGVGMTREELVK,FAFQAEVNR,GVVDSDDLPLNVSR,AQAYQTGKDISTNYYASQK,GLFDEYGSK,LTESPCALVASQYGWSGNMER,SGTSEFLNK,SGYLLPDTK,LGVIEDHSNR,SILFVPTSAPR,LISLTDENALSGNEELTVK,EAVEKEFEPLLNWMKDK,FQSSHHPTDITSLDQYVER,EGSRTDDEVVQREEEAIQLDGLNASQIR,IYFMAGSSR,DISTNYYASQK,KEAESSPFVER,ELISNAS…	KGYEVIYLTEPVDEYCIQALPEFDGKR,IADDKYNDTFWKEFGTNIK,EAESSPFVER,LIINSLYK,GYEVIYLTEPVDEYCIQALPEFDGKR,AYGDRIER,VFITDDFHDMMPK,ELISNASDALDK,NLLHVTDTGVGMTREELVK,FAFQAEVNR,GVVDSDDLPLNVSR,AQAYQTGKDISTNYYASQK,TDDEVVQREEEAIQLDGLNASQIR,EVEEDEYKAFYK,EAVEKEFEPLLNWMK,GLFDEYGSK,QDKIYFMAGSSR,LTESPCALVASQYGWSGNMER,SGTSEFLNK,SGYLLPDTK,LGVIEDHSNR,SILFVPTSAPR,RVFITDDFHDMMPK,LISLTDENALSGNEELTVK,EAVEKEFEPLLNWMKDK,MKEKQDK,…
P06744-2	GPI	glucose-6-phosphate isomerase isoform 1	738	1077	1.98	3.66	2.535	3.1011	27	31	19	22	42	44.8	MIPCDFLIPVQTQHPIR,LQQWYR,TFTTQETITNAETAK,VDHQTGPIVWGEPGTNGQHAFYQLIHQGTK,INYTEGR,VWYVSNIDGTHIAK,NLVTEDVMR,SNTPILVDGKDVMPEVNK,TLAQLNPESSLFIIASK,DPQFQK,FAAYFQQGDMESNGK,FAAYFQQGDMESNGKYITK,KIEPELDGSAQVTSHDASTNGLINFIK,MLVDLAK,STEEARKELQAAGK,VFEGNRPTNSIVFTK,SPEDLER,HFVALSTNTTK,DVMPEVNK	MIPCDFLIPVQTQHPIR,LQQWYR,TFTTQETITNAETAK,VDHQTGPIVWGEPGTNGQHAFYQLIHQGTK,INYTEGR,NLVTEDVMR,VWYVSNIDGTHIAK,TFTTQETITNAETAKEWFLQAAK,SNTPILVDGKDVMPEVNK,AVLHVALR,TLAQLNPESSLFIIASK,EWFLQAAK,FAAYFQQGDMESNGK,DPQFQK,KIEPELDGSAQVTSHDASTNGLINFIK,FAAYFQQGDMESNGKYITK,MLVDLAK,VFEGNRPTNSIVFTK,STEEARKELQAAGK,SPEDLER,HFVALSTNTTK,DVMPEVNK
P62820	RAB1A	ras-related protein Rab-1A isoform 1	215	372	0.73	3.5	1.9286	2.4145	8	13	7	9	35.1	44.3	MGPGATAGGAEKSNVK,NATNVEQSFMTMAAEIK,SCLLLR,TIELDGK,LQIWDTAGQER,IQSTPVK,TITSSYYR	MGPGATAGGAEKSNVK,NATNVEQSFMTMAAEIK,SCLLLR,FADDTYTESYISTIGVDFK,TIELDGK,MGPGATAGGAEK,LQIWDTAGQER,IQSTPVK,TITSSYYR
P61981	YWHAG	14-3-3 protein gamma	397	398	1.71	3.37	2.1623	1.8784	13	21	11	16	35.6	44.1	NVTELNEPLSNEER,VISSIEQK,LAEQAERYDDMAAAMKNVTELNEPLSNEER,RATVVESSEK,LAEQAERYDDMAAAMK,YLAEVATGEK,NVVGARR,MKGDYYR,VISSIEQKTSADGNEK,NLLSVAYK,YLAEVATGEKR	KIEMVR,NCSETQYESK,RATVVESSEK,LAEQAERYDDMAAAMK,YDDMAAAMK,MKGDYYR,YLAEVATGEKR,NVTELNEPLSNEER,DSTLIMQLLR,VISSIEQK,YLAEVATGEK,ATVVESSEK,AYSEAHEISK,LAEQAER,NLLSVAYK,YDDMAAAMKNVTELNEPLSNEER
O43707	ACTN4	Alpha-actinin-4	1295	1970	1.43	3.35	1.8072	2.7065	32	48	29	40	38.7	48.1	FAIQDISVEETSAK,CQLEINFNTLQTK,MLDAEDIVNTARPDEK,MAPYQGPDAVPGALDYK,GISQEQMQEFR,IAESNHIK,QFASQANVVGPWIQTK,SFSTALYGESDL,TINEVENQILTR,ACLISLGYDVENDRQGEAEFNR,VQQLVPK,LVSIGAEEIVDGNAK,VLAGDKNFITAEELR,ISIEMNGTLEDQLSHLK,EGLLLWCQR,RDHALLEEQSK,VLAGDKNFITAEELRR,QLEAIDQLHLEYAKR,ICDQWDALGSLTHSR,DYETATLSDIK,HRDYETATLSDIK,ETTDTDTADQVIASFK,LSGSNPYTTVTPQIINSK,STLPDADRER,LSNRPAFMPSEGK,DAKGISQEQMQEFR,ELPPDQAEYCIAR,ISI…	GYEEWLLNEIR,FAIQDISVEETSAK,CQLEINFNTLQTK,LDHLAEK,MLDAEDIVNTARPDEK,MAPYQGPDAVPGALDYK,FAIQDISVEETSAKEGLLLWCQR,IAESNHIK,GISQEQMQEFR,QFASQANVVGPWIQTK,SFSTALYGESDL,TINEVENQILTR,VQQLVPK,ACLISLGYDVENDRQGEAEFNR,LVSIGAEEIVDGNAK,VLAGDKNFITAEELR,ISIEMNGTLEDQLSHLK,EGLLLWCQR,GYEEWLLNEIRR,RDHALLEEQSK,VLAGDKNFITAEELRR,AGTQIENIDEDFRDGLK,QLEAIDQLHLEYAKR,ICDQWDALGSLTHSR,DYETATLSDIK,ASIHEAWTDGKEAMLK,HRDYETATLSDIK,E…
Q9BQE3	TUBA1C	tubulin alpha-1C chain isoform c	317.33	541.5	1.4567	3.345	1.7136	2.7827	22	27	17	20	49.8	51.8	AYHEQLTVAEITNACFEPANQMVK,NLDIERPTYTNLNR,QLFHPEQLITGKEDAANNYAR,AFVHWYVGEGMEEGEFSEAR,AVCMLSNTTAVAEAWAR,TIQFVDWCPTGFK,IHFPLATYAPVISAEK,AVFVDLEPTVIDEVR,LSVDYGK,LDHKFDLMYAK,YMACCLLYR,EIIDLVLDR,VGINYQPPTVVPGGDLAK,EDAANNYAR,DVNAAIATIK,TIGGGDDSFNTFFSETGAGK,QLFHPEQLITGK	EDMAALEK,AYHEQLTVAEITNACFEPANQMVK,FDLMYAK,NLDIERPTYTNLNR,QLFHPEQLITGKEDAANNYAR,AFVHWYVGEGMEEGEFSEAR,AVCMLSNTTAVAEAWAR,TIQFVDWCPTGFK,AVFVDLEPTVIDEVR,IHFPLATYAPVISAEK,LSVDYGK,LDHKFDLMYAK,YMACCLLYR,LSVDYGKK,EIIDLVLDR,VGINYQPPTVVPGGDLAK,EDAANNYAR,DVNAAIATIK,TIGGGDDSFNTFFSETGAGK,QLFHPEQLITGK
P46777	RPL5	60S ribosomal protein L5	75	400	0.2	3.34	1.0309	3.1246	3	17	3	11	16.1	31.6	YLMEEDEDAYKKQFSQYIK,IEGDMIVCAAYAHELPK,HIMGQNVADYMR	YLMEEDEDAYKKQFSQYIK,NSVTPDMMEEMYK,IEGDMIVCAAYAHELPK,DIICQIAYAR,HIMGQNVADYMR,VTNRDIICQIAYAR,ENPVYEK,LVIQDKNK,NSVTPDMMEEMYKK,YLMEEDEDAYKK,ENPVYEKKPK
Q04917	YWHAH	14-3-3 protein eta	153	433	0.56	3.22	0.77828	2.6517	7	18	5	11	18.6	37.8	VISSIEQK,LAEQAERYDDMASAMK,MKGDYYR,NVVGARR,NLLSVAYK	AVTELNEPLSNEDRNLLSVAYK,YLAEVASGEK,DSTLIMQLLR,VISSIEQK,NSVVEASEAAYKEAFEISK,YLAEVASGEKK,LAEQAERYDDMASAMK,YDDMASAMK,MKGDYYR,LAEQAER,NLLSVAYK
P27348	YWHAQ	14-3-3 protein theta	250	377	1.19	3.065	1.5119	1.783	8	19	6	15	26.5	42.8	QTIDNSQGAYQEAFDISKK,AVTEQGAELSNEERNLLSVAYK,LAEQAERYDDMATCMK,VISSIEQK,AVTEQGAELSNEER,NLLSVAYK	AVTEQGAELSNEERNLLSVAYK,LAEQAERYDDMATCMK,AKLAEQAER,YLAEVACGDDRK,MKGDYFR,YDDMATCMK,QTIDNSQGAYQEAFDISKK,DSTLIMQLLR,EMQPTHPIR,YLAEVACGDDR,VISSIEQK,KQTIDNSQGAYQEAFDISKK,LAEQAER,AVTEQGAELSNEER,NLLSVAYK
Q9H0U4	RAB1B	ras-related protein Rab-1B	181	306	0.75	3.05	1.1544	1.9286	5	10	5	8	24.3	47.2	NATNVEQAFMTMAAEIK,SCLLLR,TIELDGK,LQIWDTAGQER,TITSSYYR	NATNVEQAFMTMAAEIK,SCLLLR,FADDTYTESYISTIGVDFK,MGPGAASGGERPNLK,TIELDGK,LQIWDTAGQER,LLVGNKSDLTTK,TITSSYYR
P11021	HSPA5	78 kDa glucose-regulated protein precursor	1003	931.5	2.17	2.995	1.8651	2.1988	22	39	18	34	34.4	54.5	VTHAVVTVPAYFNDAQR,KKELEEIVQPIISK,IDTRNELESYAYSLK,IEIESFYEGEDFSETLTR,VYEGERPLTK,QATKDAGTIAGLNVMR,VLEDSDLKKSDIDEIVLVGGSTR,DAGTIAGLNVMR,TWNDPSVQQDIK,VEIIANDQGNR,TFAPEEISAMVLTK,SQIFSTASDNQPTVTIK,ITPSYVAFTPEGER,IINEPTAAAIAYGLDKR,AKFEELNMDLFR,NQLTSNPENTVFDAK,ELEEIVQPIISK,IINEPTAAAIAYGLDK	TKPYIQVDIGGGQTK,VTHAVVTVPAYFNDAQR,MKETAEAYLGKK,VLEDSDLK,MVNDAEKFAEEDKK,IEIESFYEGEDFSETLTR,AVEEKIEWLESHQDADIEDFKAK,KSDIDEIVLVGGSTR,TFAPEEISAMVLTK,NKITITNDQNR,SQIFSTASDNQPTVTIK,NQLTSNPENTVFDAK,ITPSYVAFTPEGERLIGDAAK,ELEEIVQPIISK,IINEPTAAAIAYGLDK,DNHLLGTFDLTGIPPAPR,RALSSQHQAR,SDIDEIVLVGGSTR,KKELEEIVQPIISK,ITITNDQNR,NELESYAYSLK,KSQIFSTASDNQPTVTIK,IDTRNELESYAYSLK,LYGSAGPPPTGEEDTAEKDEL,VYEGERPLTK,QATKDA…
P50395	GDI2	rab GDP dissociation inhibitor beta isoform 1	643	927	1.4	2.96	2.0303	3.6416	19	24	16	20	35.7	53.7	VTEGSFVYK,TFEGIDPK,FLMANGQLVK,MTGSEFDFEEMKR,FKIPGSPPESMGR,DWNVDLIPK,IKLYSESLAR,GRDWNVDLIPK,MLLYTEVTR,LYSESLAR,DLGTESQIFISR,FLVYVANFDEKDPR,TDDYLDQPCYETINR,YLDFKVTEGSFVYK,VICILSHPIK,NPYYGGESASITPLEDLYKR	QLICDPSYVKDR,EPEKEIRPALELLEPIEQK,VTEGSFVYK,TFEGIDPK,LSAIYGGTYMLNKPIEEIIVQNGK,NTNDANSCQIIIPQNQVNR,FLMANGQLVK,MTGSEFDFEEMKR,FKIPGSPPESMGR,QLICDPSYVK,IKLYSESLAR,GRDWNVDLIPK,MLLYTEVTR,LYSESLAR,FLVYVANFDEKDPR,DLGTESQIFISR,TDDYLDQPCYETINR,VICILSHPIK,FVSISDLLVPK,NPYYGGESASITPLEDLYKR
P61247	RPS3A	40S ribosomal protein S3a isoform 1	236	588	0.69	2.89	1.1544	2.5938	7	14	7	14	27.6	45	ATGDETGAKVER,ADGYEPPVQESV,ACQSIYPLHDVFVR,LFCVGFTK,ATGDETGAKVERADGYEPPVQESV,VFEVSLADLQNDEVAFRK,IASDGLKGR	VFEVSLADLQNDEVAFR,ATGDETGAKVER,ADGYEPPVQESV,LMELHGEGSSSGK,ACQSIYPLHDVFVR,LFCVGFTK,VERADGYEPPVQESV,NCLTNFHGMDLTR,FKLITEDVQGK,ATGDETGAKVERADGYEPPVQESV,LITEDVQGK,TSYAQHQQVR,APAMFNIR,VFEVSLADLQNDEVAFRK
P52565	ARHGDIA	Rho GDP-dissociation inhibitor 1 isoform a	89	349	0.32	2.885	0.99526	4.1453	4	12	4	10	18.1	43.1	SIQEIQELDKDDESLRK,SIQEIQELDKDDESLR,AEEYEFLTPVEEAPK,AEEYEFLTPVEEAPKGMLAR	QSFVLKEGVEYR,SIQEIQELDKDDESLRK,YIQHTYR,SIQEIQELDKDDESLR,YKEALLGR,AEEYEFLTPVEEAPK,AEEYEFLTPVEEAPKGMLAR,IDKTDYMVGSYGPR,TDYMVGSYGPR,VNREIVSGMK
P0DMV9	HSPA1A,HSPA1B	Heat shock 70 kDa protein 1A/1B	820	1145	1.61	2.82	1.8289	3.3299	21	37	17	29	31	52.7	ITITNDKGR,QTQIFTTYSDNQPGVLIQVYEGER,TTPSYVAFTDTER,DAGVIAGLNVLR,AFYPEEISSMVLTK,QATKDAGVIAGLNVLR,ATAGDTHLGGEDFDNR,NQVALNPQNTVFDAKR,ARFEELCSDLFR,LLQDFFNGRDLNK,NQVALNPQNTVFDAK,IINEPTAAAIAYGLDR,VEIIANDQGNR,GGSGSGPTIEEVD,LRTACER,NALESYAFNMK,STLEPVEK	LLQDFFNGR,ITITNDKGR,LSKEEIER,FGDPVVQSDMK,LVNHFVEEFKR,AFYPEEISSMVLTK,QATKDAGVIAGLNVLR,ATAGDTHLGGEDFDNR,LLQDFFNGRDLNK,IINEPTAAAIAYGLDR,ELEQVCNPIISGLYQGAGGPGPGGFGAQGPK,NALESYAFNMK,YKAEDEVQRER,GKISEADKK,QTQIFTTYSDNQPGVLIQVYEGER,AQIHDLVLVGGSTR,TTPSYVAFTDTER,DAGVIAGLNVLR,SAVEDEGLKGK,MVQEAEKYKAEDEVQR,ARFEELCSDLFR,VQVSYKGETK,VLDKCQEVISWLDANTLAEKDEFEHK,NQVALNPQNTVFDAK,CQEVISWLDANTLAEKDEFEHK,VEIIANDQGNR,GG…
Q13185	C15orf57,CBX3	chromobox protein homolog 3	132	318	0.56	2.81	1.3714	3.217	3	7	3	6	21.3	40.4	LTWHSCPEDEAQ,KVEEAEPEEFVVEK,WKDSDEADLVLAK	EANMKCPQIVIAFYEER,LTWHSCPEDEAQ,KVEEAEPEEFVVEK,SKKVEEAEPEEFVVEK,WKDSDEADLVLAK,IIGATDSSGELMFLMK
Q99623	PHB2	Prohibitin-2 isoform 1	283	600	0.77	2.78	0.64965	2.3246	6	14	6	13	18.3	44.1	QKIVQAEGEAEAAK,LGLDYEER,IVQAEGEAEAAK,AIFFNR,IGGVQQDTILAEGLHFR,FNASQLITQR	MLGEALSKNPGYIK,AQVSLLIR,VLSRPNAQELPSMYQR,QKIVQAEGEAEAAK,LGLDYEER,IVQAEGEAEAAK,EYTAAVEAK,AIFFNR,QVAQQEAQR,DLQMVNISLR,IGGVQQDTILAEGLHFR,ESVFTVEGGHR,FNASQLITQR
P60866-2	RPS20	40S ribosomal protein S20 isoform 1	53	202		2.78	1.5119	2.9811	2	5	2	5	13.3	26.7	VCADLIR,LIDLHSPSEIVK	SLEKVCADLIR,LIDLHSPSEIVK,VCADLIR,TPVEPEVAIHR,DTGKTPVEPEVAIHR
P78371	CCT2	T-complex protein 1 subunit beta isoform 1	590	1013	1.17	2.77	1.3101	2.5112	14	23	13	21	33.2	48	LGGSLADSYLDEGFLLDKK,DASLMVTNDGATILK,EAVAMESYAK,AGADEERAETAR,TPGKEAVAMESYAK,LAVEAVLR,VAEIEHAEKEK,LALVTGGEIASTFDHPELVK,MLPTIIADNAGYDSADLVAQLR,EALLSSAVDHGSDEVK,VLVDMSR,EGTIGDMAILGITESFQVK,AAHSEGNTTAGLDMR	LGGSLADSYLDEGFLLDKK,DASLMVTNDGATILK,ILIANTGMDTDKIK,TPGKEAVAMESYAK,LALVTGGEIASTFDHPELVK,MLPTIIADNAGYDSADLVAQLR,AAHSEGNTTAGLDMR,GATQQILDEAER,SLHDALCVLAQTVK,AGADEERAETAR,EAVAMESYAK,LKGSGNLEAIHIIK,LAVEAVLR,EAESLIAK,VAEIEHAEKEK,EALLSSAVDHGSDEVK,EALLSSAVDHGSDEVKFR,VLVDMSR,QDLMNIAGTTLSSK,EGTIGDMAILGITESFQVK,KLGGSLADSYLDEGFLLDKK
P09525	ANXA4	annexin A4	379	633	1.21	2.74	1.3101	3.3288	9	15	8	13	28.2	49.5	SLEDDIRSDTSFMFQR,ISQTYQQQYGR,SAYFAEK,VLLVLCGGDD,AASGFNAMEDAQTLRK,AMKGAGTDEGCLIEILASR,GLGTDDNTLIR,AASGFNAMEDAQTLR	SLEDDIRSDTSFMFQR,GLGTDEDAIISVLAYR,ISQTYQQQYGR,SAYFAEK,VLLVLCGGDD,QDAQDLYEAGEKK,VLVSLSAGGRDEGNYLDDALVR,AEIDMLDIR,FLTVLCSR,AASGFNAMEDAQTLRK,AMKGAGTDEGCLIEILASR,GLGTDDNTLIR,AASGFNAMEDAQTLR
P17987	TCP1	T-complex protein 1 subunit alpha isoform a	835	1166	1.72	2.73	2.5112	3.6416	20	27	20	25	41.7	49.4	WIGLDLSNGKPR,YPVNSVNILK,AFHNEAQVNPERK,YFVEAGAMAVR,SQNVMAAASIANIVK,DDKHGSYEDAVHSGALND,GANDFMCDEMER,LGVQVVITDPEKLDQIR,ICDDELILIK,DNKQAGVFEPTIVK,NADELVK,AFHNEAQVNPER,QAGVFEPTIVK,EQLAIAEFAR,SSLGPVGLDK,SLHDALCVVK,LLEVEHPAAK,MLVDDIGDVTITNDGATILK,IACLDFSLQK,SLLVIPNTLAVNAAQDSTDLVAK	WIGLDLSNGKPR,YPVNSVNILK,DCLINAAK,AFHNEAQVNPERK,YFVEAGAMAVR,DDKHGSYEDAVHSGALND,SQNVMAAASIANIVK,GANDFMCDEMER,LGVQVVITDPEKLDQIR,ICDDELILIK,DNKQAGVFEPTIVK,NADELVK,AFHNEAQVNPER,EQLAIAEFAR,SSLGPVGLDK,QAGVFEPTIVK,LLEVEHPAAK,SLHDALCVVKR,YINENLIVNTDELGR,SLHDALCVVK,FATEAAITILR,MLVDDIGDVTITNDGATILK,SLLVIPNTLAVNAAQDSTDLVAK,IACLDFSLQK,TSASIILR
P49368	CCT3	T-complex protein 1 subunit gamma isoform a	797	1198	1.31	2.71	2.5112	3.977	18	26	17	24	40.3	51.3	KVQSGNINAAK,TAVETAVLLLR,NVLLDPQLVPGGGASEMAVAHALTEK,ELGIWEPLAVK,NLQDAMQVCR,AVAQALEVIPR,VEKIPGGIIEDSCVLR,WSSLACNIALDAVK,IVLLDSSLEYK,ALDDMISTLK,TLIQNCGASTIR,SMIEISR,IVSRPEELREDDVGTGAGLLEIK,KGESQTDIEITREEDFTR,EILSEVER,MLLDPMGGIVMTNDGNAILR,IVSRPEELREDDVGTGAGLLEIKK	ISIPVDISDSDMMLNIINSSITTK,GISDLAQHYLMR,TAVETAVLLLR,ELGIWEPLAVK,NVLLDPQLVPGGGASEMAVAHALTEK,NLQDAMQVCR,AVAQALEVIPR,AMTGVEQWPYR,VEKIPGGIIEDSCVLR,WSSLACNIALDAVK,EIQVQHPAAK,ALDDMISTLK,IVLLDSSLEYK,IPGGIIEDSCVLR,TLIQNCGASTIR,SMIEISR,ALDDMISTLKK,IVSRPEELREDDVGTGAGLLEIK,KGESQTDIEITREEDFTR,IVSRPEELREDDVGTGAGLLEIKK,KIGDEYFTFITDCKDPK,ACTILLR,EILSEVER,QGGAPDAGQE
P62263	RPS14	40S ribosomal protein S14	121	304	0.75	2.71	2.1623	4.6234	3	9	3	8	18.5	40.3	IGRIEDVTPIPSDSTR,TPGPGAQSALR,IEDVTPIPSDSTRR	IEDVTPIPSDSTR,TKTPGPGAQSALR,LRATGGNR,VKADRDESSPYAAMLAAQDVAQR,ADRDESSPYAAMLAAQDVAQR,TPGPGAQSALR,IEDVTPIPSDSTRR,IGRIEDVTPIPSDSTRR
P04792	HSPB1	Heat shock protein beta-1	294	416	1.7	2.67	2.5884	3.8327	8	11	7	9	37.5	43.4	QLSSGVSEIR,AQLGGPEAAKSDETAAK,VPFSLLR,LFDQAFGLPR,AQLGGPEAAK,VSLDVNHFAPDELTVK,LATQSNEITIPVTFESR	QLSSGVSEIR,AQLGGPEAAKSDETAAK,VPFSLLR,LFDQAFGLPR,RVPFSLLR,AQLGGPEAAK,TKDGVVEITGK,VSLDVNHFAPDELTVK,LATQSNEITIPVTFESR
Q7KZF4	SND1	staphylococcal nuclease domain-containing protein 1	1163	1748	1.19	2.63	1.848	2.5112	29	44	27	37	36.2	42.4	LSECEEQAK,LMENMRNDIASHPPVEGSYAPR,VEKVESPAK,RGEFCIAK,QFLPFLQR,SLLSAEEAAK,YGDFRADDADEFGYSR,NLPGLVQEGEPFSEEATLFTK,VITEYLNAQESAK,AGRSEAVVEYVFSGSR,FFTESR,LGTLSPAFSTR,LRPLYDIPYMFEAR,EVCFTIENK,VADISGDTQK,DTNGENIAESLVAEGLATRR,ANNPEQNRLSECEEQAK,FVDGEWYR,AAATQPDAKDTPDEPWAFPAR,VWAHYEEQPVEEVMPVLEEKER,RAAATQPDAKDTPDEPWAFPAR,VNVTVDYIRPASPATETVPAFSER,NDIASHPPVEGSYAPR,VADISGDTQKAK,EADGSETPEPFAAEAK,SSHYDELLAAEAR,…	LSECEEQAK,LMENMRNDIASHPPVEGSYAPR,VEKVESPAK,QFLPFLQR,SLLSAEEAAK,DTNGENIAESLVAEGLATR,DYVAPTANLDQK,YGDFRADDADEFGYSR,NLPGLVQEGEPFSEEATLFTK,VITEYLNAQESAK,DLKYTIENPR,AGRSEAVVEYVFSGSR,FFTESR,IHVFYIDYGNR,LGTLSPAFSTR,SEAVVEYVFSGSR,LRPLYDIPYMFEAR,EVCFTIENK,VADISGDTQK,ANNPEQNRLSECEEQAK,DTNGENIAESLVAEGLATRR,LNSGDYK,EKVWAHYEEQPVEEVMPVLEEKER,VWAHYEEQPVEEVMPVLEEK,FVDGEWYR,AAATQPDAKDTPDEPWAFPAR,ARVEKVESPAK,VWAHY…
P15311	EZR	Ezrin	582.5	880	1.21	2.625	1.3568	2.3793	27	37	25	33	39.5	49.4	QRIDEFEAL,IALLEEAR,IAQDLEMYGINYFEIK,VSAQEVR,RITEAEKNER,ENPLQFK,KAERELSEQIQR,APDFVFYAPR,LQDYEEKTK,RKPDTIEVQQMK,ELSEQIQR,VTTMDAELEFAIQPNTTGK,AKEAQDDLVK,SQEQLAAELAEYTAK,QAVDQIKSQEQLAAELAEYTAK,IGFPWSEIR,RKEDEVEEWQHR,KAPDFVFYAPR,EAQDDLVK,QLLTLSSELSQARDENKR,AQEEAERLEADR,GMLKDNAMLEYLK,SGYLSSER,QLFDQVVK,QLLTLSSELSQAR	QRIDEFEAL,IAQDLEMYGINYFEIK,RITEAEKNER,VSAQEVR,ENPLQFK,APDFVFYAPR,RKPDTIEVQQMK,ELSEQIQR,VTTMDAELEFAIQPNTTGK,AKEAQDDLVK,SQEQLAAELAEYTAK,RKEDEVEEWQHR,QAVDQIK,KAPDFVFYAPR,EAQDDLVK,AQEEAERLEADR,LQDYEEK,QLFDQVVK,ALQLEEERKR,IALLEEAR,DQWEDRIQVWHAEHR,LQDYEEKTK,ALQLEEER,FGDYNKEVHK,QAVDQIKSQEQLAAELAEYTAK,LFFLQVK,IGFPWSEIR,THNDIIHNENMR,QLLTLSSELSQARDENKR,GMLKDNAMLEYLK,SGYLSSER,EKEELMLR,QLLTLSSELSQAR
P50990	CCT8	T-complex protein 1 subunit theta isoform 1	775	1219	1.22	2.59	1.7826	3.0842	16	27	16	23	35.2	47	NLRDIDEVSSLLR,AIADTGANVVVTGGK,APGFAQMLK,LVPGGGATEIELAK,EDGAISTIVLR,FAEAFEAIPR,QITSYGETCPGLEQYAIKK,LFVTNDAATILR,QYGNEVFLAK,IAVYSCPFDGMITETK,DIDEVSSLLR,LATNAAVTVLR,TAEELMNFSKGEENLMDAQVK,GSTDNLMDDIER,AVDDGVNTFK,ETEGDVTSVK	KAHEILPNLVCCSAK,ETEGDVTSVKDAK,NLRDIDEVSSLLR,VADMALHYANK,AIADTGANVVVTGGK,TAYGPNGMNK,YNIMLVR,APGFAQMLK,MVINHLEK,LVPGGGATEIELAK,HFSGLEEAVYR,FAEAFEAIPR,EDGAISTIVLR,QITSYGETCPGLEQYAIKK,LFVTNDAATILR,QYGNEVFLAK,DIDEVSSLLR,IAVYSCPFDGMITETK,TAEELMNFSKGEENLMDAQVK,LATNAAVTVLR,GSTDNLMDDIER,AVDDGVNTFK,ETEGDVTSVK
P40925-2	MDH1	malate dehydrogenase, cytoplasmic isoform 3	288	480	0.78	2.57	2.4551	3.9239	8	13	7	10	31.8	43.2	ENFSCLTR,VIVVGNPANTNCLTASK,LGVTANDVK,MDLTAKELTEEKESAFEFLSSA,ELTEEKESAFEFLSSA,FVEGLPINDFSR,KLSSAMSAAK	VIVVGNPANTNCLTASK,SQGAALDKYAK,LGVTANDVK,AICDHVR,MDLTAKELTEEKESAFEFLSSA,GEFVTTVQQR,ELTEEKESAFEFLSSA,FVEGLPINDFSR,DLLKANVK,KLSSAMSAAK
P22626	HNRNPA2B1	Heterogeneous nuclear ribonucleoproteins A2/B1 isoform B1	371	621	1.54	2.56	1.1544	3.0842	10	16	8	12	24.3	45.8	QEMQEVQSSR,GGGGNFGPGPGSNFRGGSDGYGSGR,TLETVPLER,NMGGPYGGGNYGPGGSGGSGGYGGR,GGNFGFGDSR,ALSRQEMQEVQSSR,GGGGNFGPGPGSNFR,SGRGGNFGFGDSR	QEMQEVQSSR,LFIGGLSFETTEESLR,TLETVPLER,GFGDGYNGYGGGPGGGNFGGSPGYGGGR,LTDCVVMRDPASKR,GGNFGFGDSR,NMGGPYGGGNYGPGGSGGSGGYGGR,EESGKPGAHVTVK,IDTIEIITDR,DYFEEYGKIDTIEIITDR,ALSRQEMQEVQSSR,GGGGNFGPGPGSNFR
Q96KP4	CNDP2	Cytosolic non-specific dipeptidase isoform 1	630	846	1.06	2.53	2.1623	2.4551	13	19	13	15	40.8	44	MLAAYLYEVSQLKD,FCLEGMEESGSEGLDELIFAR,GSTDDKGPVAGWINALEAYQK,QKLPDGSEIPLPPILLGR,NVMLLPVGSADDGAHSQNEK,TVFGVEPDLTR,LVPNMTPEVVGEQVTSYLTK,YIDENQDR,WVAIQSVSAWPEK,QLGGSVELVDIGK,MMEVAAADVK,EGGSIPVTLTFQEATGK,YNYIEGTK	QKLPDGSEIPLPPILLGR,LYDDIDFDIEEFAK,NVMLLPVGSADDGAHSQNEK,TVFGVEPDLTR,WVAIQSVSAWPEK,RMMEVAAADVK,MMEVAAADVK,MLAAYLYEVSQLKD,FCLEGMEESGSEGLDELIFAR,GSTDDKGPVAGWINALEAYQK,YIDENQDR,LVPNMTPEVVGEQVTSYLTK,QLGGSVELVDIGK,EGGSIPVTLTFQEATGK,YNYIEGTK
P16152	CBR1,SETD4	carbonyl reductase [NADPH] 1 isoform 1	335	440.5	1.06	2.495	1.2539	1.8739	7	17	7	15	25.9	61	SCSPELQQK,GQAAVQQLQAEGLSPR,VVNVSSIMSVR,FHQLDIDDLQSIR,GIGLAIVR,LFSGDVVLTAR,DVTRGQAAVQQLQAEGLSPR	SETITEEELVGLMNK,ATKSPEEGAETPVYLALLPPDAEGPHGQFVSEK,SCSPELQQK,LFSGDVVLTAR,DVCTELLPLIKPQGR,DVTRGQAAVQQLQAEGLSPR,ILLNACCPGWVR,GQAAVQQLQAEGLSPR,IGVTVLSR,FRSETITEEELVGLMNK,VVNVSSIMSVR,FHQLDIDDLQSIR,GIGLAIVR,SPEEGAETPVYLALLPPDAEGPHGQFVSEK,EGWPSSAYGVTK
P06576	ATP5B	ATP synthase subunit beta, mitochondrial precursor	547.5	776	1.465	2.465	1.6661	2.5714	25	30	18	21	44.8	53.6	VVDLLAPYAK,IMDPNIVGSEHYDVAR,FTQAGSEVSALLGR,AIAELGIYPAVDPLDSTSR,IGLFGGAGVGK,LVLEVAQHLGESTVR,QFAPIHAEAPEFMEMSVEQEILVTGIK,IMNVIGEPIDER,TIAMDGTEGLVR,IPSAVGYQPTLATDMGTMQER,TREGNDLYHEMIESGVINLK,VALVYGQMNEPPGAR,IMNVIGEPIDERGPIKTK,EGNDLYHEMIESGVINLK,AHGGYSVFAGVGER,IMNVIGEPIDERGPIK,ILQDYK,VLDSGAPIKIPVGPETLGR	VVDLLAPYAK,IMDPNIVGSEHYDVAR,AIAELGIYPAVDPLDSTSR,IGLFGGAGVGK,FTQAGSEVSALLGR,LVLEVAQHLGESTVR,DATSKVALVYGQMNEPPGAR,QFAPIHAEAPEFMEMSVEQEILVTGIK,IMNVIGEPIDER,TIAMDGTEGLVR,IPSAVGYQPTLATDMGTMQER,TREGNDLYHEMIESGVINLK,TVLIMELINNVAK,VALVYGQMNEPPGAR,EGNDLYHEMIESGVINLK,IMNVIGEPIDERGPIK,AHGGYSVFAGVGER,ILQDYK,VLDSGAPIKIPVGPETLGR,VALTGLTVAEYFR,FLSQPFQVAEVFTGHMGK
P37837	TALDO1	Transaldolase	425	550.5	1.385	2.45	1.9309	2.0572	17	19	14	16	39.4	43.3	VSTEVDAR,LSDGIRK,TIVMGASFR,LSFDKDAMVAR,LIELYKEAGISKDR,LLGELLQDNAK,AAQASDLEKIHLDEK,ALAGCDFLTISPK,FAADAVKLER,WLHNEDQMAVEK,ILDWHVANTDKK,SYEPLEDPGVK,AAQASDLEK,KFAADAVKLER	VSTEVDAR,LSDGIRK,TIVMGASFR,LSFDKDAMVAR,LLGELLQDNAK,LIELYKEAGISKDR,AAQASDLEKIHLDEK,ALAGCDFLTISPK,FAADAVKLER,LSSTWEGIQAGK,WLHNEDQMAVEK,ILDWHVANTDKK,AAQASDLEK,RLIELYK,SYEPLEDPGVK,KFAADAVKLER
Q99832-3	CCT7	T-complex protein 1 subunit eta isoform d	592	972	1.12	2.37	1.4384	3.4173	13	24	12	21	27.4	44.2	VQGGALEDSQLVAGVAFKK,TFSYAGFEMQPK,QLCDNAGFDATNILNK,GGAEQFMEETER,TCTFILR,AIKNDSVVAGGGAIEMELSK,EIAVTVK,ALEIIPR,ATISNDGATILK,YNFFTGCPK,TATQLAVNK,TLVDIAK	CQVFEETQIGGER,LPIGDVATQYFADR,QLCDNAGFDATNILNK,TFSYAGFEMQPK,SLHDAIMIVR,AIKNDSVVAGGGAIEMELSK,QQLLIGAYAK,EIAVTVK,LLDVVHPAAK,VPEEDLK,STVDAPTAAGR,VQGGALEDSQLVAGVAFKK,GGAEQFMEETER,TCTFILR,GKATISNDGATILK,ALEIIPR,ATISNDGATILK,YNFFTGCPK,TATQLAVNK,TLVDIAK,LPIGDVATQYFADRDMFCAGR
P11413-2	G6PD	Isoform Long of Glucose-6-phosphate 1-dehydrogenase	751	1065	1.45	2.31	2.0599	3.8497	20	28	18	25	35.4	50.2	NVKLPDAYER,LTVADIR,RNELVIR,QSEPFFK,IIVEKPFGR,SDELREAWR,GGYFDEFGIIR,GPTEADELMK,NIHESCMSQIGWNR,GYLDDPTVPR,DGLLPENTFIVGYAR,LQFHDVAGDIFHQQCK,WDGVPFILR,KPGMFFNPEESELDLTYGNR,NSYVAGQYDDAASYQR,VGFQYEGTYK,LKLEDFFAR,VQPNEAVYTK	NVKLPDAYER,LTVADIR,LNSHMNALHLGSQANR,RNELVIR,EDQIYR,QSEPFFK,IIVEKPFGR,GGYFDEFGIIR,NIHESCMSQIGWNR,GPTEADELMK,GYLDDPTVPR,DGLLPENTFIVGYAR,GPTEADELMKR,WDGVPFILR,LQFHDVAGDIFHQQCK,KPGMFFNPEESELDLTYGNR,CISEVQANNVVLGQYVGNPDGEGEATK,DNIACVILTFKEPFGTEGR,NSYVAGQYDDAASYQR,LILDVFCGSQMHFVR,LPDAYER,VGFQYEGTYK,LKLEDFFAR,VQPNEAVYTK,IFGPIWNR
P61978-2	HNRNPK	Heterogeneous nuclear ribonucleoprotein K isoform a	440	740	0.86	2.27	1.0893	2.6308	11	18	9	17	20.2	43.5	IILDLISESPIK,DYDDMSPR,SRNTDEMVELR,TDYNASVSVPDSSGPER,GSYGDLGGPIITTQVTIPK,GSDFDCELR,DLAGSIIGK,GGDLMAYDR,NTDEMVELR	NLPLPPPPPPR,IILDLISESPIK,LFQECCPHSTDR,SRNTDEMVELR,DYDDMSPR,HESGASIKIDEPLEGSEDR,GGDLMAYDRR,GSYGDLGGPIITTQVTIPK,IIPTLEEGLQLPSPTATSQLPLESDAVECLNYQHYK,LLIHQSLAGGIIGVK,NTDEMVELR,GGDLMAYDR,RPAEDMEEEQAFKR,IDEPLEGSEDR,TDYNASVSVPDSSGPER,GSDFDCELR,DLAGSIIGK
P06748-2	NPM1	nucleophosmin isoform 2	276	414	1.11	2.22	0.87382	1.3101	8	12	7	10	22.2	24.5	GPSSVEDIKAK,SAPGGGSKVPQK,MTDQEAIQDLWQWRK,TPKGPSSVEDIKAK,MQASIEKGGSLPK,SAPGGGSKVPQKK,MQASIEKGGSLPKVEAK	GPSSVEDIKAK,FINYVK,MQASIEK,SAPGGGSKVPQK,MTDQEAIQDLWQWRK,TPKGPSSVEDIKAK,MTDQEAIQDLWQWR,GGSLPKVEAK,GPSSVEDIK,SAPGGGSKVPQKK
Q16698-2	DECR1	unnamed protein product	290	555	0.57	2.22	1.0691	1.9764	7	14	7	12	19.3	35.8	AMLPPNSFQGK,AGVEAMSK,FFSPLQK,VTKEQWDTIEELIR,VAFITGGGTGLGK,EQWDTIEELIR,FNVIQPGPIK	AMLPPNSFQGK,KVTKEQWDTIEELIR,FDGGEEVLISGEFNDLRK,ATAEQISSQTGNK,AGVEAMSK,VTKEQWDTIEELIRK,FFSPLQK,VAGHPNIVINNAAGNFISPTER,VTKEQWDTIEELIR,VAFITGGGTGLGK,FNVIQPGPIK,EQWDTIEELIR
P19367-2	HK1	hexokinase-1 isoform HKI-R	1064	1628	1.05	2.17	1.8118	2.9069	26	40	23	34	28.1	36.5	TVCGVVSR,ASGVEGADVVK,LGVEPSDDDCVSVQHVCTIVSFR,FKASGVEGADVVK,LSDETLIDIMTR,GQISETLK,IDEAILITWTKR,IDEAILITWTK,MLPTFVR,DMLLEVK,LVDEYSLNAGK,RTPDGTENGDFLALDLGGTNFR,FLLSESGSGK,ITPELLTR,MVSGMYLGELVR,MISGMYLGEIVR,AILQQLGLNSTCDDSILVK,SIPDGSEKGDFIALDLGGSSFR,EGLLFEGR,HIDLVEGDEGR,DFNPTATVK,GAAMVTAVAYR,GKFNTSDVSAIEK	LGVEPSDDDCVSVQHVCTIVSFR,LSDETLIDIMTR,NILIDFTK,GQISETLK,IDEAILITWTK,LALLQVR,DMLLEVK,MLPTFVR,FLLSESGSGK,ITPELLTR,AAQLCGAGMAAVVDKIR,EGLLFEGR,AEMELGLR,TPDGTENGDFLALDLGGTNFR,DFNPTATVK,TVCGVVSR,ASGVEGADVVK,FKASGVEGADVVK,GDFIALDLGGSSFR,IDEAILITWTKR,RLVPDSDVR,RTPDGTENGDFLALDLGGTNFR,LVDEYSLNAGK,MVSGMYLGELVR,MRAEMELGLRK,MISGMYLGEIVR,AILQQLGLNSTCDDSILVK,ATDCVGHDVVTLLR,SIPDGSEKGDFIALDLGGSSFR,MRAEMELGLR,TTVGV…
P31947-2	SFN	SFN protein	185	415	0.67	2.17	1.8943	3.1246	6	11	6	10	31	42.5	SNEEGSEEKGPEVR,GAVEKGEELSCEER,MKGDYYR,NLLSVAYK,LAEQAERYEDMAAFMK,VLSSIEQK	SNEEGSEEKGPEVR,DSTLIMQLLR,AKLAEQAER,GAVEKGEELSCEER,MKGDYYR,YLAEVATGDDKKR,LAEQAER,NLLSVAYK,VLSSIEQK,LAEQAERYEDMAAFMK
P08758	ANXA5	annexin A5	347	644	0.85	2.15	0.87382	2.1623	8	13	8	13	29.6	44.6	LYDAYELK,GTVTDFPGFDERADAETLRK,GTVTDFPGFDERADAETLR,AIKQVYEEEYGSSLEDDVVGDTSGYYQR,ALLLLCGEDD,SNAQRQEISAAFK,GAGTNEKVLTEIIASR,VLTEIIASR	GTVTDFPGFDERADAETLRK,LYDAYELK,SEIDLFNIR,GTVTDFPGFDERADAETLR,AIKQVYEEEYGSSLEDDVVGDTSGYYQR,QVYEEEYGSSLEDDVVGDTSGYYQR,GAGTDDHTLIR,SEIDLFNIRK,WGTDEEKFITIFGTR,AMKGLGTDEESILTLLTSR,ALLLLCGEDD,SNAQRQEISAAFK,VLTEIIASR
P18206-2	VCL	Vinculin isoform VCL	1131	1960	0.83	2.09	1.4004	2.7798	28	46	28	44	32.7	48.6	STVEGIQASVK,MTGLVDEAIDTK,ELTPQVVSAAR,NFTVEKMSAEINEIIR,DYLIDGSR,GILSGTSDLLLTFDEAEVRK,LLAVAATAPPDAPNREEVFDER,VGKETVQTTEDQILKR,GWLRDPSASPGDAGEQAIR,EAVKAASDELSK,QVATALQNLQTK,GVGQAAIR,CDRVDQLTAQLADLAAR,AVAGNISDPGLQK,AQQVSQGLDVLTAK,LANVMMGPYRQDLLAK,ALASQLQDSLK,AGEVINQPMMMAAR,ALASQLQDSLKDLK,MLGQMTDQVADLR,EVENSEDPKFR,MALLMAEMSR,ALASIDSKLNQAK,WIDNPTVDDR,VMLVNSMNTVK,ALASIDSK,VAMANIQPQMLVAGATSIAR,AQQVSQGLDV…	MTGLVDEAIDTK,STVEGIQASVK,TDAGFTLR,ELTPQVVSAAR,NQGIEEALKNR,VLQLTSWDEDAWASK,NFTVEKMSAEINEIIR,DYLIDGSR,MQEAMTQEVSDVFSDTTTPIK,GILSGTSDLLLTFDEAEVRK,LLAVAATAPPDAPNREEVFDER,VGKETVQTTEDQILKR,GWLRDPSASPGDAGEQAIR,REILGTCK,QVATALQNLQTK,KLEAMTNSK,EAVKAASDELSK,GVGQAAIR,SLLDASEEAIKK,TNISDEESEQATEMLVHNAQNLMQSVK,AQQVSQGLDVLTAK,TISPMVMDAK,SLGEISALTSK,AVAGNISDPGLQK,SFLDSGYR,LVQAAQMLQSDPYSVPAR,ALASQLQDSLK,ALIQCAK,A…
P21796	VDAC1	voltage-dependent anion-selective channel protein 1	203	500	0.67	2.08	0.96842	1.9552	5	11	5	10	21.5	37.8	EHINLGCDMDFDIAGPSIR,YQIDPDACFSAK,LTLSALLDGK,LGLGLEFQA,VTQSNFAVGYK	WTEYGLTFTEK,LTFDSSFSPNTGK,EHINLGCDMDFDIAGPSIR,WNTDNTLGTEITVEDQLAR,YQIDPDACFSAK,YRWTEYGLTFTEK,LTLSALLDGK,LGLGLEFQA,VTQSNFAVGYK,LTFDSSFSPNTGKK
P00338-3	LDHA	L-lactate dehydrogenase A chain isoform 3	373	382.33	1.51	2.0533	1.0423	1.254	18	24	15	20	31	45.7	LVIITAGAR,NRVIGSGCNLDSAR,YLMGER,VTLTSEEEAR,QQEGESRLNLVQR,DYNVTANSK,RVHPVSTMIK,FIIPNVVK,VTLTSEEEARLK,VIGSGCNLDSAR,QVVESAYEVIK,IVSGKDYNVTANSK,SADTLWGIQKELQF,SADTLWGIQK,KSADTLWGIQK	KSADTLWGIQKELQF,LKGEMMDLQHGSLFLR,TLHPDLGTDKDKEQWK,LVIITAGAR,NRVIGSGCNLDSAR,YLMGER,VTLTSEEEAR,EVHKQVVESAYEVIK,QQEGESRLNLVQR,DYNVTANSK,RVHPVSTMIK,FIIPNVVK,VTLTSEEEARLK,VIGSGCNLDSAR,QVVESAYEVIK,IVSGKDYNVTANSK,SADTLWGIQKELQF,DQLIYNLLKEEQTPQNK,SADTLWGIQK,KSADTLWGIQK
Q13268	DHRS2	dehydrogenase/reductase SDR family member 2, mitochondrial isoform 2	327	326	1.3	1.97	1.1544	1.1544	9	10	7	8	21.4	21.4	VFHGNESLWK,VNCVVPGIIK,AEDREQLVAK,TALLGLTR,DGAHVVISSR,TLALELAPK,TLALELAPKDIR	VFHGNESLWK,VNCVVPGIIK,DIRVNCVVPGIIK,AEDREQLVAK,TALLGLTR,DGAHVVISSR,TLALELAPK,TLALELAPKDIR
Q5VTE0	EEF1A1P5	Putative elongation factor 1-alpha-like 3	288.25	385.25	1.17	1.955	1.3347	1.8112	24	25	21	20	37.4	37.2	SGDAAIVDMVPGKPMCVESFSDYPPLGR,QTVAVGVIK,YYVTIIDAPGHR,FEKEAAEMGK,YEEIVKEVSTYIK,EHALLAYTLGVK,MDSTEPPYSQK,TIEKFEK,TIEKFEKEAAEMGK,YEEIVK,EVSTYIK,STTTGHLIYK,RYEEIVK,VETGVLKPGMVVTFAPVNVTTEVK,QLIVGVNK,YEEIVKEVSTYIKK,KLEDGPK,IGGIGTVPVGR,LPLQDVYK,EVSTYIKK,YYVTIIDAPGHRDFIK	SGDAAIVDMVPGKPMCVESFSDYPPLGR,QTVAVGVIK,YYVTIIDAPGHR,FEKEAAEMGK,EHALLAYTLGVK,YEEIVKEVSTYIK,MDSTEPPYSQK,TIEKFEK,YEEIVK,TIEKFEKEAAEMGK,STTTGHLIYK,EVSTYIK,VETGVLKPGMVVTFAPVNVTTEVK,QLIVGVNK,YEEIVKEVSTYIKK,KLEDGPK,IGGIGTVPVGR,LPLQDVYK,EVSTYIKK,YYVTIIDAPGHRDFIK
P25705	ATP5A1	ATP synthase subunit alpha, mitochondrial isoform a precursor	763	1158	1.01	1.92	1.9427	2.9242	15	23	15	22	30.3	41.2	VVDALGNAIDGKGPIGSK,EAYPGDVFYLHSR,TGAIVDVPVGEELLGR,ELIIGDR,ISVREPMQTGIK,VVDALGNAIDGK,TGTAEMSSILEER,ILGADTSVDLEETGR,QVAGTMKLELAQYR,TSIAIDTIINQK,STVAQLVK,VLSIGDGIAR,RLTDADAMK,AVDSLVPIGR,HALIIYDDLSK	QGQYSPMAIEEQVAVIYAGVR,VVDALGNAIDGKGPIGSK,EAYPGDVFYLHSR,QMSLLLR,TGAIVDVPVGEELLGR,ELIIGDR,VGSAAQTR,ISVREPMQTGIK,LTDADAMK,GMSLNLEPDNVGVVVFGNDK,VVDALGNAIDGK,TGTAEMSSILEER,ILGADTSVDLEETGR,QVAGTMKLELAQYR,LELAQYR,DNGKHALIIYDDLSK,STVAQLVK,TSIAIDTIINQK,VLSIGDGIAR,RLTDADAMK,AVDSLVPIGR,HALIIYDDLSK
P05141	SLC25A5	ADP/ATP translocase 2	426	341.5	1.6	1.915	1.5809	1.5099	13	19	12	17	29.5	45.6	KGTDIMYTGTLDCWR,AGAEREFR,TDAAVSFAK,LAADVGKAGAER,GMLPDPK,GAWSNVLR,DFLAGGVAAAISK,EQGVLSFWR,TRLAADVGK,GTDIMYTGTLDCWR,LAADVGKAGAEREFR,LLLQVQHASK	TDAAVSFAK,DEGGKAFFK,LAADVGKAGAER,GAWSNVLR,DFLAGGVAAAISK,TAVAPIER,TRLAADVGK,IPKEQGVLSFWR,LLLQVQHASK,KGTDIMYTGTLDCWR,AAYFGIYDTAK,GTDIMYTGTLDCWRK,QIFLGGVDKR,EQGVLSFWR,GMGGAFVLVLYDEIKK,GTDIMYTGTLDCWR,KGTDIMYTGTLDCWRK
P09493-10	TPM1	tropomyosin alpha-1 chain isoform Tpm1.5cy	110	410	0.21	1.88	0.64965	1.2275	4	11	4	11	14.7	30.6	LATALQKLEEAEKAADESER,IQLVEEELDRAQER,QLEEQLR,RIQLVEEELDRAQER	IQLVEEELDR,LATALQKLEEAEK,LATALQKLEEAEKAADESER,IQLVEEELDRAQER,LEEAEKAADESER,EAETRAEFAER,QLEEQLR,AQKDEEKMEIQEIQLK,KLVIIESDLERAEER,LEEAEKAADESERGMK,RIQLVEEELDRAQER
P19013	KRT4	Keratin, type II cytoskeletal 4	319.5	924	0.48	1.87	0.82484	3.7706	12	21	11	20	22.4	40.2	VDSLNDEINFLK,FASFIDK,EYQELMSVK,LALDIEIATYR,GFSCGSAIVGGGK,GAFSSVSMSGGAGR,SEIAELNR,NLDLDSIIAEVR,IISTTTLNK,AQYEEIAQR,VQQLQISVDQHGDNLK	SLYNLR,WNLLQQQTTTTSSK,FASFIDK,YEEEINKR,LRAEIENIKK,EYQELMSVK,LALDIEIATYR,SISMSVAGSR,SEIAELNR,NLDLDSIIAEVR,TMQDSVEDFK,VDSLNDEINFLK,DVDAAYLNKVELEAK,GENALKDAHSK,GAFSSVSMSGGAGR,RVELEAALQQAK,IISTTTLNK,SKAEAEALYQTK,VQQLQISVDQHGDNLK,AQYEEIAQR
P23284	PPIB	peptidyl-prolyl cis-trans isomerase B precursor	75	338	0.14	1.87	0.3895	2.7276	2	9	2	8	9.7	44.9	VLEGMEVVR,IEVEKPFAIAKE	VLEGMEVVR,VIKDFMIQGGDFTRGDGTGGK,TVDNFVALATGEK,DKPLKDVIIADCGK,DTNGSQFFITTVK,SIYGERFPDENFKLK,IEVEKPFAIAKE,VIKDFMIQGGDFTR
P07195	LDHB	L-lactate dehydrogenase B chain	309	455	1.125	1.865	1.4035	1.5665	14	17	12	13	34.7	35.3	YLMAEK,GLTSVINQK,LIAPVAEEEATVPNNK,MVVESAYEVIK,LKDDEVAQLKK,VIGSGCNLDSAR,LKDDEVAQLK,IVVVTAGVR,SADTLWDIQK,SADTLWDIQKDLKDL,IVADKDYSVTANSK,QQEGESRLNLVQR	GLTSVINQK,FIIPQIVK,MVVESAYEVIK,LIAPVAEEEATVPNNK,LKDDEVAQLKK,VIGSGCNLDSAR,LKDDEVAQLK,IVVVTAGVR,SADTLWDIQK,SADTLWDIQKDLK,SADTLWDIQKDLKDL,IVADKDYSVTANSK,QQEGESRLNLVQR
P18669	LOC643576,PGAM1	Phosphoglycerate mutase 1	125.5	350.5	0.525	1.84	0.68298	2.7008	6	14	5	12	21.2	49.6	KAMEAVAAQGK,HGESAWNLENR,YADLTEDQLPSCESLKDTIAR,AMEAVAAQGK,VLIAAHGNSLR	KAMEAVAAQGK,HGEAQVK,ALPFWNEEIVPQIK,HYGGLTGLNK,HGESAWNLENR,HYGGLTGLNKAETAAK,YADLTEDQLPSCESLKDTIAR,AMEAVAAQGK,FSGWYDADLSPAGHEEAK,VLIAAHGNSLR,FSGWYDADLSPAGHEEAKR,DAGYEFDICFTSVQKR
P62269	RPS18	40S ribosomal protein S18	71	216	0.42	1.84	0.51991	1.3101	2	6	2	5	13.1	25	VITIMQNPR,AGELTEDEVERVITIMQNPR	IPDWFLNR,VITIMQNPR,AGELTEDEVERVITIMQNPR,RAGELTEDEVER,VLNTNIDGR
P51148-2	RAB5C	ras-related protein Rab-5C isoform b	449	275	2.57	1.81	2.8312	1.5214	10	13	9	9	44.9	44.9	NEPQNATGAPGR,AVEFQEAQAYADDNSLLFMETSAK,GVDLQENNPASR,QASPNIVIALAGNK,KLPKNEPQNATGAPGR,LVLLGESAVGK,NRGVDLQENNPASR,GAQAAIVVYDITNTDTFAR,TAMNVNEIFMAIAK	NEPQNATGAPGR,AVEFQEAQAYADDNSLLFMETSAK,GVDLQENNPASR,QASPNIVIALAGNK,KLPKNEPQNATGAPGR,NRGVDLQENNPASR,GAQAAIVVYDITNTDTFAR,LVLLGESAVGK,TAMNVNEIFMAIAK
P30050	RPL12	60S ribosomal protein L12	212	265	0.68	1.81	1.5119	2.1623	4	5	4	5	28.4	38.1	KVGDDIAK,IGPLGLSPK,CTGGEVGATSALAPK,HSGNITFDEIVNIAR	QAQIEVVPSASALIIK,KVGDDIAK,IGPLGLSPK,CTGGEVGATSALAPK,HSGNITFDEIVNIAR
P47756-2	CAPZB	F-actin-capping protein subunit beta isoform 1	191	341	0.36	1.77	0.71907	2.3839	4	12	4	8	19.8	40.8	LVEDMENKIR,SGSGTMNLGGSLTR,QMEKDETVSDCSPHIANIGR,STLNEIYFGK	LVEDMENKIR,GCWDSIHVVEVQEK,SGSGTMNLGGSLTR,SPWSNKYDPPLEDGAMPSAR,QMEKDETVSDCSPHIANIGR,DKVVGKDYLLCDYNR,SVQTFADK,STLNEIYFGK
P45880-1	VDAC2	voltage-dependent anion-selective channel protein 2 isoform 1	199	435	0.405	1.76	0.95565	2.324	6	14	6	13	24.2	51.1	NNFAVGYR,LTFDTTFSPNTGK,VGLALELEA,YQLDPTASISAK,LTLSALVDGK,TGDFQLHTNVNDGTEFGGSIYQK	WCEYGLTFTEK,VTGTLETK,NNFAVGYR,LTFDTTFSPNTGK,GFGFGLVK,SCSGVEFSTSGSSNTDTGKVTGTLETK,VCEDLDTSVNLAWTSGTNCTR,WNTDNTLGTEIAIEDQICQGLK,YQLDPTASISAK,YKWCEYGLTFTEK,LTFDTTFSPNTGKK,LTLSALVDGK,TGDFQLHTNVNDGTEFGGSIYQK
P54652	HSPA2	Heat shock-related 70 kDa protein 2	345	763	0.38	1.73	0.6681	0.89574	9	21	9	15	17.2	19.4	VQVEYKGETK,ARFEELNADLFR,VEIIANDQGNR,IINEPTAAAIAYGLDKK,TTPSYVAFTDTER,KDIGPNK,NQVAMNPTNTIFDAK,LLQDFFNGK,STAGDTHLGGEDFDNR	VQVEYKGETK,ITITNDKGR,ARFEELNADLFR,VEIIANDQGNR,IINEPTAAAIAYGLDKK,RNTTIPTK,TTPSYVAFTDTER,VQVEYK,NQVAMNPTNTIFDAK,LLQDFFNGKELNK,LLQDFFNGK,IINEPTAAAIAYGLDK,NTTIPTK,FEELNADLFR,STAGDTHLGGEDFDNR
Q00765	REEP5	Receptor expression-enhancing protein 5	66	217	0.33	1.73	0.9307	1.6827	2	7	2	7	10	19.5	KATVNLLGEEK,ETADAITK	NCMTDLLAK,ETADAITKEAK,KATVNLLGEEK,AKETADAITK,AKETADAITKEAK,NCMTDLLAKLEAK,ETADAITK
P30101	PDIA3	protein disulfide-isomerase A3 precursor	885	616	1.9	1.705	2.7276	1.9747	21	26	18	23	41.1	53.2	FLQDYFDGNLKR,DGEEAGAYDGPR,TFSHELSDFGLESTAGEIPVVAIR,LSKDPNIVIAK,VDCTANTNTCNK,SEPIPESNDGPVK,IFRDGEEAGAYDGPR,GFPTIYFSPANK,LNFAVASR,FVMQEEFSR,LAPEYEAAATR,EATNPPVIQEEKPK,MDATANDVPSPYEVR,AASNLRDNYR,YGVSGYPTLK,DLLIAYYDVDYEK,TVAYTEQK,ELSDFISYLQR	FLQDYFDGNLKR,FISDKDASIVGFFDDSFSEAHSEFLK,DGEEAGAYDGPR,LSKDPNIVIAK,FEDKTVAYTEQK,TFSHELSDFGLESTAGEIPVVAIR,VDCTANTNTCNK,SEPIPESNDGPVK,IFRDGEEAGAYDGPR,GFPTIYFSPANK,LNFAVASR,FVMQEEFSR,LAPEYEAAATR,MDATANDVPSPYEVR,FAHTNVESLVNEYDDNGEGIILFRPSHLTNK,YGVSGYPTLK,KTFSHELSDFGLESTAGEIPVVAIR,DLLIAYYDVDYEK,QAGPASVPLRTEEEFKK,GSNYWR,TVAYTEQK,ELSDFISYLQR,FLQDYFDGNLK
P32119	PRDX2	Peroxiredoxin-2	205	304	1.69	1.69	2.1623	2.9811	6	8	5	7	22.7	27.7	LSEDYGVLKTDEGIAYR,RLSEDYGVLKTDEGIAYR,IGKPAPDFK,SVDEALR,QITVNDLPVGR	LSEDYGVLKTDEGIAYR,ATAVVDGAFK,LSEDYGVLK,RLSEDYGVLKTDEGIAYR,IGKPAPDFK,QITVNDLPVGR,SVDEALR
P54819-2	AK2	adenylate kinase 2, mitochondrial isoform b	182	325	1.08	1.65	0.9307	1.6827	6	8	5	7	20.6	32.3	APSVPAAEPEYPKGIR,NGFLLDGFPR,APSVPAAEPEYPK,AMVASGSELGK,AVLLGPPGAGK	NGFLLDGFPR,LQAYHTQTTPLIEYYR,APSVPAAEPEYPK,AMVASGSELGK,AVLLGPPGAGK,AMVASGSELGKK,LVSDEMVVELIEK
Q15181	PPA1	Inorganic pyrophosphatase	140	462	0.33	1.6	0.83298	1.9764	4	12	4	10	22.1	45.6	GISCMNTTLSESPFKCDPDAAR,AAPFSLEYR,VIAINVDDPDAANYNDINDVKR,VCARGEIIGVK	HTGCCGDNDPIDVCEIGSK,GISCMNTTLSESPFKCDPDAAR,AAPFSLEYR,VLGILAMIDEGETDWK,VIAINVDDPDAANYNDINDVKR,MEIATKDPLNPIKQDVK,YVANLFPYK,GISCMNTTLSESPFK,VCARGEIIGVK,VFLKNEK
Q9UQ80	PA2G4	proliferation-associated protein 2G4	265	572	0.54	1.56	0.82335	2.3246	6	13	6	13	14.7	34.5	YKMGGDIANR,AAHLCAEAALR,TIIQNPTDQQK,FDAMPFTLR,AFFSEVER,ALLQSSASR	HELLQPFNVLYEKEGEFVAQFK,TIIQNPTDQQK,EGEFVAQFK,ITSGPFEPDLYKSEMEVQDAELK,FDAMPFTLR,SDQDYILKEGDLVK,ALLQSSASR,YKMGGDIANR,AAHLCAEAALR,TIIQNPTDQQKK,TAENATSGETLEENEAGD,MGGDIANR,AFFSEVER
P11177-2	PDHB	pyruvate dehydrogenase (lipoamide) beta, isoform CRA_c	116	358	0.29	1.54	0.58489	1.9286	4	9	3	7	10.5	24.9	DFLIPIGK,VTGADVPMPYAK,IMEGPAFNFLDAPAVR	VFLLGEEVAQYDGAYK,VVSPWNSEDAK,ILEDNSIPQVK,EGVECEVINMR,IMEGPAFNFLDAPAVR,DFLIPIGK,VTGADVPMPYAK
P29401-2	TKT	transketolase isoform 2	590.67	613	1.08	1.48	1.6352	1.7479	29	36	25	30	41.6	54.6	NSTFSEIFKK,SGKPAELLK,IIALDGDTK,AYGQALAK,QAFTDVATGSLGQGLGAACGMAYTGK,AVELAANTK,VLDPFTIKPLDR,KISSDLDGHPVPK,SVPTSTVFYPSDGVATEK,DAIAQAVR,CEAFGWHAIIVDGHSVEELCK,ISSDLDGHPVPK,ILATPPQEDAPSVDIANIR,LQALKDTANR,LDNLVAILDINR,KAYGQALAK,MFGIDRDAIAQAVR,MPSLPSYK,LGQSDPAPLQHQMDIYQKR,TSRPENAIIYNNNEDFQVGQAK,LILDSAR,KLILDSAR,HQPTAIIAK,LGQSDPAPLQHQMDIYQK,GICFIR	SGKPAELLK,NSTFSEIFKK,IIALDGDTK,AYGQALAK,QAFTDVATGSLGQGLGAACGMAYTGK,KISSDLDGHPVPK,VLDPFTIKPLDR,AVELAANTK,SVPTSTVFYPSDGVATEK,DAIAQAVR,NSTFSEIFK,CEAFGWHAIIVDGHSVEELCK,ISSDLDGHPVPK,ILATPPQEDAPSVDIANIR,LQALKDTANR,GITGVEDKESWHGKPLPK,LDNLVAILDINR,KAYGQALAK,MFGIDRDAIAQAVR,MPSLPSYK,LGQSDPAPLQHQMDIYQKR,ILTVEDHYYEGGIGEAVSSAVVGEPGITVTHLAVNR,SKDDQVTVIGAGVTLHEALAAAELLKK,TSRPENAIIYNNNEDFQVGQAK,LILDSAR,KLILDSAR,…
P15880	RPS2	40S ribosomal protein S2	278	327	0.82	1.46	0.99526	1.5119	6	9	6	8	23.2	29.6	SPYQEFTDHLVK,GTGIVSAPVPK,CGSVLVR,GCTATLGNFAK,KLLMMAGIDDCYTSAR,AEDKEWMPVTK	SPYQEFTDHLVK,GTGIVSAPVPK,CGSVLVR,GCTATLGNFAK,KLLMMAGIDDCYTSAR,ATFDAISK,TYSYLTPDLWK,AEDKEWMPVTK
P30044-2	PRDX5	Epididymis secretory protein Li 55	55	187	0.2	1.45	0.29155	1.7826	1	5	1	4	6.7	32	FSMVVQDGIVK	GVLFGVPGAFTPGCSK,FSMVVQDGIVK,THLPGFVEQAEALK,LLADPTGAFGK
P62851	RPS25	40S ribosomal protein S25	139	152	0.94	1.43	2.1623	3.6416	3	4	3	4	24	32	NTKGGDAPAAGEDA,AALQELLSK,AQVIYTR	LITPAVVSER,NTKGGDAPAAGEDA,AALQELLSK,AQVIYTR
P09429	HMGB1	High mobility group protein B1	94	255	0.28	1.4	1.3714	4.6234	4	8	4	8	23.2	38.1	GKFEDMAK,IKGEHPGLSIGDVAK,FKDPNAPK,KLGEMWNNTAADDKQPYEK	HPDASVNFSEFSK,GKFEDMAK,IKGEHPGLSIGDVAK,YEKDIAAYR,LGEMWNNTAADDKQPYEK,HPDASVNFSEFSKK,TYIPPKGETK,FKDPNAPK
P23526	AHCY	adenosylhomocysteinase isoform 1	533	682	1.07	1.36	1.4621	2.3246	10	13	10	12	24	30	ALDIAENEMPGLMR,ATDVMIAGK,GISEETTTGVHNLYK,KALDIAENEMPGLMR,VPAINVNDSVTK,IILLAEGR,VADIGLAAWGR,KLDEAVAEAHLGK,WLNENAVEK,VAVVAGYGDVGK	AGIPVYAWK,ATDVMIAGK,GISEETTTGVHNLYK,VPAINVNDSVTK,KALDIAENEMPGLMR,IILLAEGR,YPQLLPGIR,VADIGLAAWGR,KLDEAVAEAHLGK,WLNENAVEK,MMANGILK,VAVVAGYGDVGK
P49748-2	ACADVL	very long-chain specific acyl-CoA dehydrogenase, mitochondrial isoform 2 precursor	512	943	0.68	1.33	0.99526	1.9854	12	19	12	19	24	40.7	IHNFGLIQEK,TPVTDPATGAVKEK,GGVVTSNPLGF,VAMHILNNGR,ITAFVVER,IFEGTNDILR,GIVNEQFLLQR,IREGMAALQSDPWQQELYR,NPFGNAGLLLGEAGK,GILLFGTK,ALEQFATVVEAK,GQLTTDQVFPYPSVLNEEQTQFLK	LFVALQGCMDK,MQAARMAASLGRQLLR,GGVVTSNPLGF,TPVTDPATGAVKEK,VAMHILNNGR,SLSEGHPTAQHEK,VPSENVLGEVGSGFK,ITAFVVER,GIVNEQFLLQR,LASGETVAAFCLTEPSSGSDAASIR,NPFGNAGLLLGEAGK,GILLFGTK,ALEQFATVVEAK,IHNFGLIQEK,FFEEVNDPAKNDALEMVEETTWQGLK,IFEGTNDILR,TPVTDPATGAVK,IREGMAALQSDPWQQELYR,GQLTTDQVFPYPSVLNEEQTQFLK
P61586	RHOA	Transforming protein RhoA precursor	69	195	0.33	1.33	0.58489	1.5119	2	7	2	5	10.3	21.2	EVFEMATR,IGAFGYMECSAK	EVFEMATR,IGAFGYMECSAK,DGVREVFEMATR,LVIVGDGACGK,WTPEVK
P02545-2	LMNA	lamin isoform C	754	996	0.9	1.31	1.4816	2.7927	15	22	15	22	29	42.8	NSNLVGAAHEELQQSR,LSPSPTSQR,LKDLEALLNSK,LAVYIDR,LLEGEEER,LVEIDNGKQR,LRDLEDSLAR,MQQQLDEYQELLDIK,SGAQASSTPLSPTR,SLETENAGLR,AAYEAELGDAR,AQNTWGCGNSLR,ITESEEVVSR,TALINSTGEEVAMR,LADALQELR	EGDLIAAQAR,NSNLVGAAHEELQQSR,LSPSPTSQR,LKDLEALLNSK,LAVYIDR,LVEIDNGKQR,LLEGEEER,IRIDSLSAQLSQLQK,VAVEEVDEEGKFVR,LRDLEDSLAR,MQQQLDEYQELLDIK,SGAQASSTPLSPTR,EAALSTALSEKR,LQLELSK,SLETENAGLR,AAYEAELGDAR,AQNTWGCGNSLR,LQEKEDLQELNDR,NIYSEELR,ITESEEVVSR,TALINSTGEEVAMR,LADALQELR
P30405	PPIF	peptidyl-prolyl cis-trans isomerase F, mitochondrial precursor	111	242	0.52	1.31	0.21153	0.4678	3	6	3	5	11.1	29.4	KIVITDCGQLS,IVITDCGQLS,VVLELKADVVPK	KIVITDCGQLS,IVITDCGQLS,VVLELKADVVPK,FPDENFTLK,GSGDPSSSSSSGNPLVYLDVDANGKPLGR
P05388	RPLP0	60S acidic ribosomal protein P0	279	458	0.74	1.29	1.1544	1.7826	6	8	6	8	22.7	32.4	AGAIAPCEVTVPAQNTGLGPEK,SNYFLK,IIQLLDDYPK,GKAVVLMGK,GTIEILSDVQLIK,CFIVGADNVGSK	VLALSVETDYTFPLAEK,AGAIAPCEVTVPAQNTGLGPEK,SNYFLK,TSFFQALGITTK,IIQLLDDYPK,GHLENNPALEK,GTIEILSDVQLIK,CFIVGADNVGSK
P50991	CCT4	T-complex protein 1 subunit delta isoform a	596	683	0.93	1.28	1.7384	2.3982	16	19	15	17	32	38.5	GIHPTIISESFQK,TVTIVVR,ALIAGGGAPEIELALR,SIHDALCVIR,MLVELSK,VIDPATATSVDLR,AYILNLVK,GSNKLVIEEAER,LVIEEAER,SILKIDDVVNTR,FSNISAAK,LGGTIDDCELVEGLVLTQK,MIQDGKGDVTITNDGATILK,TLSGMESYCVR,IMVIKDIEREDIEFICK	GIHPTIISESFQK,TVTIVVR,SIHDALCVIR,ALIAGGGAPEIELALR,MLVELSK,VIDPATATSVDLR,QMQVLHPAAR,LTEYSR,AYILNLVK,LVIEEAER,GSNKLVIEEAER,GIEILTDMSRPVELSDRETLLNSATTSLNSK,LGGTIDDCELVEGLVLTQK,FSNISAAK,MIQDGKGDVTITNDGATILK,TLSGMESYCVR,IMVIKDIEREDIEFICK
P48735	IDH2	isocitrate dehydrogenase [NADP], mitochondrial isoform 1 precursor	589	681	1.11	1.25	2.0303	2.5938	13	17	12	14	32.9	35.3	FAQMLEK,YFDLGLPNRDQTDDQVTIDSALATQK,SSGGFVWACK,VCVETVESGAMTK,VAKPVVEMDGDEMTR,GKLDGNQDLIR,CATITPDEAR,TIEAEAAHGTVTR,LIDDMVAQVLK,LNEHFLNTTDFLDTIK,NILGGTVFR,ATDFVADR	FAQMLEK,YFDLGLPNRDQTDDQVTIDSALATQK,SSGGFVWACK,IIWQFIK,VCVETVESGAMTK,GKLDGNQDLIR,CATITPDEAR,VAKPVVEMDGDEMTR,LIDDMVAQVLK,NILGGTVFR,LNEHFLNTTDFLDTIK,FKDIFQEIFDK,NILGGTVFREPIICK,ATDFVADR
P48047	ATP5O	ATP synthase subunit O, mitochondrial precursor	184	230	0.71	1.23	1.0309	1.4245	5	6	5	6	24.8	31.4	SLNDITAKER,VAQILKEPK,VAASVLNPYVK,YATALYSAASK,TDPSILGGMIVR	SLNDITAKER,VAQILKEPK,VAASVLNPYVK,LVRPPVQVYGIEGR,YATALYSAASK,TDPSILGGMIVR
P48643	CCT5	T-complex protein 1 subunit epsilon isoform a	412	703	0.62	1.23	1.2638	2.535	12	19	11	18	21.2	39	IAILTCPFEPPKPK,GVIVDKDFSHPQMPK,AVTIFIR,LMVELSK,MLVIEQCK,DVDFELIKVEGK,FSELTAEK,SLHDALCVIR,HKLDVTSVEDYK,IDDIRKPGESEE,IADGYEQAAR	IAILTCPFEPPKPK,AVTIFIR,EKFEEMIQQIK,ETGANLAICQWGFDDEANHLLLQNNLPAVR,FSELTAEK,SLHDALCVIR,HKLDVTSVEDYK,QQISLATQMVR,IADGYEQAAR,LMGLEALK,VAIEHLDKISDSVLVDIKDTEPLIQTAK,GVIVDKDFSHPQMPK,ALQKYEK,KQQISLATQMVR,LMVELSK,DVDFELIKVEGK,MLVIEQCK,IDDIRKPGESEE
Q8WUM4	PDCD6IP	Programmed cell death 6-interacting protein isoform 1	536	1080	0.49	1.23	0.89058	1.7977	14	24	14	23	17.6	33.1	NIQVSHQEFSK,LALASLGYEK,KADLVNR,STPVNVPISQK,EVFPVLAAK,NREILDESLR,LLDEEEATDNDLRAK,VPDLKDLDPIGK,YYDQICSIEPK,FIQQTYPSGGEEQAQYCR,ELPELLQR,FYNELTEILVR,CSDIVFAR,TMQGSEVVNVLK	NIQVSHQEFSK,LANQAADYFGDAFK,LQHAAELIK,LALASLGYEK,DTIVLLCKPEPELNAAIPSANPAK,FLTALAQDGVINEEALSVTELDR,LLDEEEATDNDLR,STPVNVPISQK,EPSAPSIPTPAYQSSPAGGHAPTPPTPAPR,NREILDESLR,LLDEEEATDNDLRAK,VPDLKDLDPIGK,EVFPVLAAK,MVPVSVQQSLAAYNQR,SLLSNLDEVKK,YYDQICSIEPK,SVNFDMTSK,ELPELLQR,EGLENDLK,FYNELTEILVR,CSDIVFAR,SVIEQGGIQTVDQLIK,TMQGSEVVNVLK
P09972	ALDOC	Fructose-bisphosphate aldolase C	527	651	1.6	1.22	1.1544	1.4484	12	16	10	12	29.1	30.4	GVVPLAGTDGETTTQGLDGLSER,RLSQIGVENTEENRR,DNAGAATEEFIK,CQYVTEK,ALQASALNAWR,VDKGVVPLAGTDGETTTQGLDGLSER,VLAAVYK,YASICQQNGIVPIVEPEILPDGDHDLKR,YASICQQNGIVPIVEPEILPDGDHDLK,LSQIGVENTEENRR	GVVPLAGTDGETTTQGLDGLSER,RLSQIGVENTEENRR,AEVNGLAAQGK,CQYVTEK,VDKGVVPLAGTDGETTTQGLDGLSER,QVLFSADDR,VLAAVYK,LSQIGVENTEENR,YASICQQNGIVPIVEPEILPDGDHDLKR,ELSDIALR,YASICQQNGIVPIVEPEILPDGDHDLK,LSQIGVENTEENRR
P05091	ALDH2	aldehyde dehydrogenase, mitochondrial isoform 1 precursor	587	722	1.08	1.2	2.1623	2.8986	13	14	12	13	27.8	32.6	KTFPTVNPSTGEVICQVAEGDKEDVDK,AAFQLGSPWR,VIQVAAGSSNLKR,ILGYINTGK,TFVQEDIYDEFVER,VVGNPFDSKTEQGPQVDETQFK,ELGEYGLQAYTEVK,VVGNPFDSK,LGPALATGNVVVMK,TEQGPQVDETQFK,TIPIDGDFFSYTR,VTLELGGK	FKTIEEVVGR,ELGEYGLQAYTEVK,VVGNPFDSK,TEQGPQVDETQFK,AAFQLGSPWR,KTFPTVNPSTGEVICQVAEGDKEDVDK,VIQVAAGSSNLKR,ILGYINTGK,TFVQEDIYDEFVER,ANNSTYGLAAAVFTK,LGPALATGNVVVMK,TIPIDGDFFSYTR,VTLELGGK
O75131	CPNE3	Copine-3	388	680	0.52	1.2	1.6102	2.1623	10	15	10	14	23.2	29	FGVYDIDNK,TIELSDDDFLGECECTLGQIVSSK,SSPVEFECINEK,ISLNSLCYGDMDK,NSGVISVK,NCLNPQFSK,VALNVSCANLLDKDIGSK,VVLFEMEAR,GSITISAEEIKDNR,DIVQFVPFR	LKFGVYDIDNK,QTSDGNWLMVHR,SSPVEFECINEK,ISLNSLCYGDMDK,NSGVISVK,LYGPTNFSPIINHVAR,SPLGEVAIR,KLDNKDLFGK,FGVYDIDNK,TIELSDDDFLGECECTLGQIVSSK,NCLNPQFSK,DIVQFVPFR,GSITISAEEIKDNR,VVLFEMEAR
P63244	GNB2L1	Guanine nucleotide-binding protein subunit beta-2-like 1	233	351.5	0.56	1.195	1.0691	1.5335	5	12	5	11	19.5	37.2	IIVDELKQEVISTSSK,VWQVTIGTR,DETNYGIPQR,YTVQDESHSEWVSCVR,LWDLTTGTTTR	FSPNSSNPIIVSCGWDK,IIVDELKQEVISTSSK,VWQVTIGTR,DETNYGIPQR,YTVQDESHSEWVSCVR,LWNTLGVCK,IWDLEGK,LTRDETNYGIPQR,DVLSVAFSSDNR,DKTIIMWK,LWDLTTGTTTR
Q9HAB8-2	PPCS	phosphopantothenate--cysteine ligase isoform b	86	158	0.48	1.19	0.51991	1.848	2	4	2	4	12.3	34	IVDNLQSR,HTAFIGDRN	IQSSGGPLQITMK,HTAFIGDRN,IVDNLQSR,LLLSEEEIEKGVEIEEK
P00491	PNP	purine nucleoside phosphorylase	119	329	0.34	1.19	0.3895	0.9307	3	7	3	6	11.7	29	LVFGFLNGR,FGDRFPAMSDAYDR,ANHEEVLAAGK	LVFGFLNGR,VFGFSLITNK,LGADAVGMSTVPEVIVAR,FGDRFPAMSDAYDR,ELQEGTYVMVAGPSFETVAECR,ANHEEVLAAGK
P12236	SLC25A6	ADP/ATP translocase 3	326	300.5	0.95	1.18	1.3357	0.95546	9	12	9	12	29.1	37.2	DFLAGGIAAAISK,AAYFGVYDTAK,GMLPDPK,GAWSNVLR,EQGVLSFWR,KGADIMYTGTVDCWR,TRLAADVGK,LAADVGKSGTER,LLLQVQHASK	DFLAGGIAAAISK,AAYFGVYDTAK,DEGGKAFFK,GADIMYTGTVDCWR,GAWSNVLR,GMGGAFVLVLYDELKK,EQGVLSFWR,TAVAPIER,KGADIMYTGTVDCWR,TRLAADVGK,IPKEQGVLSFWR,LLLQVQHASK
P14550	AKR1A1	alcohol dehydrogenase [NADP(+)]	226	391	0.41	1.17	1.1544	2.7276	6	11	6	10	24.3	38.4	GDNPFPK,DAGHPLYPFNDPY,HIDCAAIYGNEPEIGEALKEDVGPGK,GLEVTAYSPLGSSDR,MPLIGLGTWK,SPAQILLR	DAGHPLYPFNDPY,GDNPFPK,YIVPMLTVDGK,HIDCAAIYGNEPEIGEALKEDVGPGK,EELFVTSK,ALEALVAK,VFDFTFSPEEMKQLNALNK,GLEVTAYSPLGSSDR,MPLIGLGTWK,SPAQILLR
Q99497	PARK7	protein DJ-1	126	143	0.36	1.17	0.77828	0.77828	3	5	2	3	16.9	16.9	GAEEMETVIPVDVMRR,VTVAGLAGKDPVQCSR	GAEEMETVIPVDVMRR,VTVAGLAGKDPVQCSR,GAEEMETVIPVDVMR
O00299	CLIC1	chloride intracellular channel protein 1	324	289	1.25	1.15	1.1544	0.8389	7	9	7	9	40.2	47.3	YLSNAYAREEFASTCPDDEEIELAYEQVAK,VLDNYLTSPLPEEVDETSAEDEGVSQR,VLDNYLTSPLPEEVDETSAEDEGVSQRK,GVTFNVTTVDTK,IGNCPFSQR,LAALNPESNTAGLDIFAK,YLSNAYAR	VLDNYLTSPLPEEVDETSAEDEGVSQR,YLSNAYAREEFASTCPDDEEIELAYEQVAK,VLDNYLTSPLPEEVDETSAEDEGVSQRK,EEFASTCPDDEEIELAYEQVAK,NSNPALNDNLEK,IGNCPFSQR,LAALNPESNTAGLDIFAK,FLDGNELTLADCNLLPK,YLSNAYAR
P13639	EEF2	Elongation factor 2	456.25	624.5	0.6825	1.1375	0.70385	1.1117	36	48	32	38	34.3	39.6	ARPFPDGLAEDIDKGEVSAR,QFAEMYVAK,YLAEKYEWDVAEAR,IMGPNYTPGKK,TGTITTFEHAHNMR,FAAKGEGQLGPAER,ETVSEESNVLCLSK,YRCELLYEGPPDDEAAMGIK,GPLMMYISK,FYAFGR,RCLYASVLTAQPR,SCDPKGPLMMYISK,VFSGLVSTGLK,CELLYEGPPDDEAAMGIK,EGALCEENMR,GHVFEESQVAGTPMFVVK,ARPFPDGLAEDIDKGEVSARQELK,FSVSPVVR,YFDPANGKFSK,GEGQLGPAER,SDPVVSYRETVSEESNVLCLSK,VNFTVDQIR,VAVEAKNPADLPK,SDPVVSYR,KEDLYLKPIQR,IMGPNYTPGK,GGGQIIPTAR,STLTDSLVCK,TILMMGR,AY…	ARPFPDGLAEDIDKGEVSAR,YLAEKYEWDVAEAR,QFAEMYVAK,IMGPNYTPGKK,TGTITTFEHAHNMR,AIMDKKANIR,EDLYLKPIQR,YEWDVAEAR,ETVSEESNVLCLSK,YRCELLYEGPPDDEAAMGIK,FTDTRKDEQER,GPLMMYISK,FYAFGR,RCLYASVLTAQPR,VFSGLVSTGLK,CELLYEGPPDDEAAMGIK,KVEDMMK,EGALCEENMR,GHVFEESQVAGTPMFVVK,NMSVIAHVDHGK,ARPFPDGLAEDIDKGEVSARQELK,FSVSPVVR,YFDPANGKFSK,GEGQLGPAER,SDPVVSYRETVSEESNVLCLSK,VNFTVDQIR,IMGPNYTPGKKEDLYLKPIQR,VAVEAKNPADLPK,SDPVVSY…
P11586	MTHFD1	C-1-tetrahydrofolate synthase, cytoplasmic	638	1222	0.51	1.13	1.219	2.1623	15	25	15	25	21.4	32.2	KITIGQAPTEK,VLLSALER,KGEPVSAEDLGVSGALTVLMK,AYIQENLELVEK,LDIDPETITWQR,GVPTGFILPIR,VLDTNDR,LGIEKTDPTTLTDEEINR,TPVPSDIDISR,APAEILNGKEISAQIR,GDLNDCFIPCTPK,EIGLLSEEVELYGETK,FSDIQIR,IYGADDIELLPEAQHKAEVYTK,GCLELIKETGVPIAGR	KITIGQAPTEK,IFHELTQTDK,KGEPVSAEDLGVSGALTVLMK,AYIQENLELVEK,GVPTGFILPIR,AAEEIGIK,APAEILNGKEISAQIR,TDTESELDLISR,AAQAPSSFQLLYDLK,EIGLLSEEVELYGETK,FSDIQIR,TDPTTLTDEEINR,IYGADDIELLPEAQHKAEVYTK,GCLELIKETGVPIAGR,VLLSALER,LDIDPETITWQR,VLDTNDR,LGIEKTDPTTLTDEEINR,TPVPSDIDISR,GDLNDCFIPCTPK,VVGDVAYDEAKER,LVGPEGFVVTEAGFGADIGMEK,TTTESEVMK,QPSQGPTFGIK,KVVGDVAYDEAKER
Q9Y365	STARD10	PCTP-like protein	144	348	0.46	1.13	0.9307	1.6827	4	8	4	7	17.1	25	ESVQVPDDQDFR,WDSNVIETFDIAR,LAASTEPQGPRPVLGR,ACLKYPEWK	ESVQVPDDQDFR,WDSNVIETFDIAR,KWDSNVIETFDIAR,LAASTEPQGPRPVLGR,ACLKYPEWK,SSQFLAPK,AGVSVWVQAVEMDR
P25786-2	PSMA1	proteasome subunit alpha type-1 isoform 1	235	191	0.86	1.115	1.5809	1.0501	7	11	7	9	30.1	42	NQYDNDVTVWSPQGR,LVSLIGSK,TQIPTQR,HMSEFMECNLNELVK,AQPAQPADEPAEKADEPMEH,KAQPAQPADEPAEKADEPMEH,ALRETLPAEQDLTTK	NQYDNDVTVWSPQGR,LLCNFMR,LVSLIGSK,TQIPTQR,HMSEFMECNLNELVK,AQPAQPADEPAEKADEPMEH,KAQPAQPADEPAEKADEPMEH,ALRETLPAEQDLTTK,DLEFTIYDDDDVSPFLEGLEERPQRK
Q7L5L3-1	GDPD3	glycerophosphodiester phosphodiesterase domain containing 3, isoform CRA_c	111	302	0.23	1.09	0.35936	1.1544	3	8	3	7	10.1	23.8	DRVVVVSHDENLCR,SDLLELDCQLTR,VVVVSHDENLCR	HYLDNHGPAAR,DVGSLDFEDLPLYKEK,TPMSVEIK,DRVVVVSHDENLCR,SDLLELDCQLTR,DVGSLDFEDLPLYK,VVVVSHDENLCR
P61081	UBE2M	NEDD8-conjugating enzyme Ubc12	38	202	0.16	1.09	0.23285	1.3101	1	5	1	5	6.5	21.3	IQKDINELNLPK	IQKDINELNLPK,LFEQNVQR,KASAAQLR,DINELNLPK,GGYIGSTYFER
P09651-2	HNRNPA1	Heterogeneous nuclear ribonucleoprotein A1 isoform a	92	440	0.1	1.09	0.15478	2.1623	1	10	1	9	5.6	40	NQGGYGGSSSSSSYGSGR	IEVIEIMTDR,GFGFVTYATVEEVDAAMNARPHK,SESPKEPEQLRK,KLFIGGLSFETTDESLR,SSGPYGGGGQYFAKPR,GFAFVTFDDHDSVDKIVIQK,NQGGYGGSSSSSSYGSGR,EDSQRPGAHLTVK,LFIGGLSFETTDESLR
P50897	PPT1	palmitoyl-protein thioesterase 1 isoform 1 precursor	202	350	0.73	1.08	1.3101	1.848	5	7	5	7	19.9	22.5	ETIPLQETSLYTQDR,KTLNAGAYSK,CPGESSHICDFIR,LQQGYNAMGFSQGGQFLR,SGQAKETIPLQETSLYTQDR	TLNAGAYSK,GINESYKK,ETIPLQETSLYTQDR,KTLNAGAYSK,CPGESSHICDFIR,LQQGYNAMGFSQGGQFLR,SGQAKETIPLQETSLYTQDR
Q13228-4	SELENBP1	selenium-binding protein 1 isoform 3	359	676	0.4	1.06	0.74753	1.4771	7	13	7	13	17.7	32.8	IYVVDVGSEPR,EEIVYLPCIYR,GGPVQVLEDEELKSQPEPLVVK,HEIVQTLSLK,LVLPSLISSR,NTGTEAPDYLATVDVDPK,DGLIPLEIR	IYVVDVGSEPR,NEGGTWSVEK,QYDISDPQRPR,EEIVYLPCIYR,GNGKGGFVLLDGETFEVK,NTGTEAPDYLATVDVDPK,LVLPSLISSR,DGLIPLEIR,VAGGPQMIQLSLDGKR,GGPVQVLEDEELKSQPEPLVVK,HEIVQTLSLK,GTWERPGGAAPLGYDFWYQPR,TKLVLPSLISSR
P62826	RAN	GTP-binding nuclear protein Ran isoform 1	81	225.5	0.305	1.06	0.69686	1.848	3	7	3	7	13.4	28.2	NLQYYDISAK,LVLVGDGGTGK,HLTGEFEK	VCENIPIVLCGNKVDIK,FNVWDTAGQEK,NLQYYDISAK,HLTGEFEK,LVLVGDGGTGK,GPIKFNVWDTAGQEK,VCENIPIVLCGNK
P60953	CDC42	cell division control protein 42 homolog isoform 1 precursor	72	182	0.16	1.06	0.77828	3.217	2	5	2	5	10.9	29.3	CVVVGDGAVGK,YVECSALTQK	QKPITPETAEK,CVVVGDGAVGK,YVECSALTQK,TPFLLVGTQIDLRDDPSTIEK,AVKYVECSALTQK
P36957	DLST	dihydrolipoyllysine-residue succinyltransferase component of 2-oxoglutarate dehydrogenase complex, mitochondrial isoform 1 precursor	334	406	0.68	1.05	1.2387	1.2387	8	10	8	8	16.9	16.9	AKPAEAPAAAAPK,TPAFAESVTEGDVRWEK,DDLVTVK,LGFMSAFVK,VEGGTPLFTLR,NVEAMNFADIER,TPAFAESVTEGDVR,GLVVPVIR	TPAFAESVTEGDVRWEK,AKPAEAPAAAAPK,DDLVTVK,LGFMSAFVK,VEGGTPLFTLR,NVEAMNFADIER,TPAFAESVTEGDVR,GLVVPVIR
P38646	HSPA9	Stress-70 protein, mitochondrial precursor	524	657	0.90333	1.04	1.2135	1.5098	29	37	24	29	39.7	42.2	QAASSLQQASLK,KDSETGENIR,QATKDAGQISGLNVLR,RYDDPEVQKDIK,QAVTNPNNTFYATK,VLENAEGAR,RTIAPCQK,VQQTVQDLFGR,ETGVDLTKDNMALQR,DAGQISGLNVLR,MKETAENYLGHTAK,AKCELSSSVQTDINLPYLTMDSSGPK,STNGDTFLGGEDFDQALLR,YDDPEVQKDIK,EQQIVIQSSGGLSKDDIENMVK,AQFEGIVTDLIRR,NAVITVPAYFNDSQR,QAVTNPNNTFYATKR,AQFEGIVTDLIR,AMQDAEVSKSDIGEVILVGGMTR,NAEKYAEEDR,NTTIPTK,RYDDPEVQK,TTPSVVAFTADGER	VINEPTAAALAYGLDK,RYDDPEVQKDIK,VLENAEGAR,RTIAPCQK,LYSPSQIGAFVLMK,ETGVDLTKDNMALQR,ASNGDAWVEAHGK,DSETGENIR,YDDPEVQKDIK,NAVITVPAYFNDSQR,AMQDAEVSK,QAVTNPNNTFYATKR,AQFEGIVTDLIR,AMQDAEVSKSDIGEVILVGGMTR,NAEKYAEEDR,TTPSVVAFTADGER,QAASSLQQASLK,KDSETGENIR,YDDPEVQK,QATKDAGQISGLNVLR,QAVTNPNNTFYATK,VQQTVQDLFGR,DAGQISGLNVLR,MKETAENYLGHTAK,STNGDTFLGGEDFDQALLR,EQQIVIQSSGGLSKDDIENMVK,AQFEGIVTDLIRR,NTTIPTK,RYDDPEVQK
P51858	HDGF	hepatoma-derived growth factor isoform a	175	272	0.6	1.02	0.53993	1.0535	4	7	4	6	14.5	23.7	CGDLVFAK,KGFSEGLWEIENNPTVK,GFSEGLWEIENNPTVK,IDEMPEAAVK	RAGDLLEDSPK,CGDLVFAK,KGFSEGLWEIENNPTVK,GFSEGLWEIENNPTVK,IDEMPEAAVK,NSTPSEPGSGR
P60842	EIF4A1	Eukaryotic initiation factor 4A-I isoform 1	580	450	1.62	1.015	2.3246	1.9198	17	19	12	16	33.9	43.3	AILPCIK,KGVAINMVTEEDKR,MFVLDEADEMLSR,VFDMLNR,VLITTDLLAR,DFTVSAMHGDMDQKER,ELAQQIQK,LQMEAPHIIVGTPGR,KVDWLTEK,GYDVIAQAQSGTGK,KEELTLEGIR,GIYAYGFEKPSAIQQR	MFVLDEADEMLSR,DFTVSAMHGDMDQKER,ELAQQIQK,GYDVIAQAQSGTGK,ENYIHR,GIYAYGFEKPSAIQQR,KGVAINMVTEEDKR,AILPCIK,GIDVQQVSLVINYDLPTNR,VFDMLNR,VLITTDLLAR,RKVDWLTEK,LQMEAPHIIVGTPGR,KVDWLTEK,GFKDQIYDIFQK,KEELTLEGIR
Q07021	C1QBP	Complement component 1 Q subcomponent-binding protein, mitochondrial precursor	129	255	0.22	1.01	0.23285	0.87382	2	7	2	5	14.8	29	ALVLDCHYPEDEVGQEDEAESDIFSIR,MSGGWELELNGTEAK	VEEQEPELTSTPNFVVEVIKNDDGKK,VEEQEPELTSTPNFVVEVIK,ALVLDCHYPEDEVGQEDEAESDIFSIR,MSGGWELELNGTEAK,AFVDFLSDEIKEER
P00966	ASS1	Argininosuccinate synthase	320	422	0.61	0.98	1.1544	1.6827	9	11	9	11	22.3	28.8	TQDPAKAPNTPDILEIEFK,KQVEIAQR,LKEYHR,NQAPPGLYTK,VFIEDVSR,TQDPAKAPNTPDILEIEFKK,GQVYILGR,FELSCYSLAPQIK,FAELVYTGFWHSPECEFVR	KQVEIAQR,LKEYHR,TQDPAKAPNTPDILEIEFK,NQAPPGLYTK,DGTTHQTSLELFMYLNEVAGK,MPEFYNR,IDIVENR,TQDPAKAPNTPDILEIEFKK,GQVYILGR,FELSCYSLAPQIK,FAELVYTGFWHSPECEFVR
Q12904-2	AIMP1	aminoacyl tRNA synthase complex-interacting multifunctional protein 1 isoform b precursor	103	338	0.18	0.97	0.27427	1.0691	2	7	2	7	11.3	27.9	KHPDADSLYVEEVDVGEIAPR,QQSIAGSADSKPIDVSR	IGCIITAR,KHPDADSLYVEEVDVGEIAPR,QQSIAGSADSKPIDVSR,ITFDAFPGEPDKELNPK,TVVSGLVNHVPLEQMQNR,KQQSIAGSADSKPIDVSR,GAEADQIIEYLK
P19338	NCL	Nucleolin	633	765	0.73	0.96	1.8072	2.8566	14	18	14	18	19.2	26.9	IVTDRETGSSK,VTQDELKEVFEDAAEIR,GLSEDTTEETLKESFDGSVR,AIRLELQGPR,LELQGPR,NSTWSGESK,QGTEIDGR,NLPYKVTQDELKEVFEDAAEIR,TGISDVFAKNDLAVVDVR,SISLYYTGEK,GIAYIEFK,GFGFVDFNSEEDAK,NDLAVVDVR,SISLYYTGEKGQNQDYR	IVTDRETGSSK,VTQDELKEVFEDAAEIR,TGISDVFAK,GLSEDTTEETLKESFDGSVR,AIRLELQGPR,ATFIKVPQNQNGK,LELQGPR,ALELTGLK,FGYVDFESAEDLEK,SKGYAFIEFASFEDAK,TGISDVFAKNDLAVVDVR,NLPYKVTQDELKEVFEDAAEIR,QGTEIDGR,GIAYIEFK,GFGFVDFNSEEDAK,NDLAVVDVR,TEADAEKTFEEK,SISLYYTGEKGQNQDYR
P23246	SFPQ	splicing factor, proline- and glutamine-rich	437	627	0.73	0.96	1.395	2.2903	12	17	12	17	18.8	24.8	STGKGIVEFASKPAAR,FGQGGAGPVGGQGPR,LFVGNLPADITEDEFKR,GIVEFASKPAAR,ALAEIAKAELDDTPMRGR,YGEPGEVFINK,FAQHGTFEYEYSQR,GMGPGTPAGYGR,YGEPGEVFINKGK,ANLSLLR,FATHAAALSVR,AVVIVDDRGR	ALAEIAKAELDDTPMR,LFVGNLPADITEDEFKR,LFVGNLPADITEDEFK,YGEPGEVFINK,SLDEMEKQQR,EMEEQMR,ISDSEGFKANLSLLR,FAQHGTFEYEYSQR,ANLSLLR,SEEKISDSEGFK,GFGFIKLESR,FGQGGAGPVGGQGPR,GIVEFASKPAAR,SPPPGMGLNQNR,GMGPGTPAGYGR,FATHAAALSVR,AVVIVDDRGR
P16435	POR	NADPH--cytochrome P450 reductase	303	771	0.28	0.95	0.56475	1.9663	7	18	7	18	13.4	33.3	FAVFGLGNK,TNVLYELAQYASEPSEQELLRK,NPFLAAVTTNR,NIIVFYGSQTGTAEEFANR,TALTYYLDITNPPR,GVATNWLR,LEQLGAQR	VYMGEMGR,EVGETLLYYGCR,YYSIASSSK,NPFLAAVTTNR,TNVLYELAQYASEPSEQELLRK,SYENQKPPFDAK,DGALTQLNVAFSR,LEQLGAQR,FAVFGLGNK,INKGVATNWLR,ESSFVEK,NIIVFYGSQTGTAEEFANR,TALTYYLDITNPPR,GVATNWLR,QYELVVHTDIDAAK,IRYESGDHVAVYPANDSALVNQLGK,GRYSLDVWS,EQFWPAVCEHFGVEATGEESSIR
P20340-2	RAB6A	ras-related protein Rab-6A isoform a	89	186	0.3	0.94	0.3895	0.9307	2	6	2	4	12	23	VAAALPGMESTQDR,LQLWDTAGQER	ELNVMFIETSAK,VAAALPGMESTQDR,LVFLGEQSVGK,LQLWDTAGQER
P31930	UQCRC1	cytochrome b-c1 complex subunit 1, mitochondrial precursor	356	592	0.52	0.93	1.848	2.8986	10	14	10	14	23.3	40.8	MVLAAAGGVEHQQLLDLAQK,NALVSHLDGTTPVCEDIGR,ADLTEYLSTHYK,SGMFWLR,NRPGSALEK,IAEVDASVVR,IPLAEWESR,LCTSATESEVAR,SLLTYGR,FTGSEIR	MVLAAAGGVEHQQLLDLAQK,ADLTEYLSTHYK,SGMFWLR,RIPLAEWESR,LCTSATESEVAR,DVVFNYLHATAFQGTPLAQAVEGPSENVR,HLGGIPWTYAEDAVPTLTPCR,NALVSHLDGTTPVCEDIGR,NRPGSALEK,EMQENDASMR,YIYDQCPAVAGYGPIEQLPDYNR,IAEVDASVVR,SLLTYGR,FTGSEIR
P09622-2	DLD	Dihydrolipoyl dehydrogenase, mitochondrial isoform 2	297	465	0.44	0.92	0.96842	2.3839	6	9	6	9	18.5	29.5	NLGLEELGIELDPR,GRIPVNTR,ADGGTQVIDTK,TNADTDGMVK,LGADVTAVEFLGHVGGVGIDMEISK,GIEMSEVR	NLGLEELGIELDPR,ADGGTQVIDTK,IPNIYAIGDVVAGPMLAHK,GRIPVNTR,SEEQLKEEGIEYK,TNADTDGMVK,GIEMSEVR,LGADVTAVEFLGHVGGVGIDMEISK,VCHAHPTLSEAFR
P04181	OAT	ornithine aminotransferase, mitochondrial isoform 1 precursor	226	541	0.3	0.92	0.58489	1.8184	5	11	5	11	15.2	32.3	HQVLFIADEIQTGLAR,AFYNNVLGEYEEYITK,LPSDVVTAVR,TVQGPPTSDDIFER,SQVDKLTLTSR	NELMKLPSDVVTAVR,HQVLFIADEIQTGLAR,AFYNNVLGEYEEYITK,VAIAALEVLEEENLAENADK,LPSDVVTAVR,GKGIYLWDVEGR,TVQGPPTSDDIFER,IVFAAGNFWGR,GLLNAIVIK,WLAVDYENVRPDIVLLGK,SQVDKLTLTSR
P19623	SRM	spermidine synthase	214	419	0.45	0.9	0.84785	1.9286	5	9	5	9	13.2	34.1	YYNSDVHR,YQDILVFR,KVLIIGGGDGGVLR,AAFVLPEFAR,VLIIGGGDGGVLR	YYNSDVHR,EVVKHPSVESVVQCEIDEDVIQVSK,YQDILVFR,KVLIIGGGDGGVLR,NPSTNFQEPVQPLTQQQVAQMQLK,FLPGMAIGYSSSK,EVVKHPSVESVVQCEIDEDVIQVSKK,AAFVLPEFAR,VLIIGGGDGGVLR
P84103-2	SRSF3	splicing factor, arginine/serine-rich 3, isoform CRA_a	77	117	0.89	0.89	1.7826	2.5938	3	5	3	4	30.6	44.3	DSCPLDCK,AFGYYGPLR,NPPGFAFVEFEDPRDAADAVR	DSCPLDCK,AFGYYGPLR,VYVGNLGNNGNKTELER,NPPGFAFVEFEDPRDAADAVR
Q9Y6U3	SCIN	Adseverin isoform 1	532	751	0.61	0.89	0.83298	1.3357	11	16	11	16	19.4	25.5	SELIVVEEGSEPSELIK,KGGQAPAPPTR,ELQGYESNDFVSYFK,SLGGQAVQIR,TAEEFLQQMNYSK,ANQVATGIR,VLGEKPELPDGGDDDDIIADISNRK,GASQEEEKGAEYVASVLK,NTQIQVLPEGGETPIFK,LKANQVATGIR,GRSELIVVEEGSEPSELIK	VLGEKPELPDGGDDDDIIADISNR,KGGQAPAPPTR,SELIVVEEGSEPSELIK,TPIVIIK,ELQGYESNDFVSYFK,SLGGQAVQIR,KDYQTSPLLETQAEDHPPR,TAEEFLQQMNYSK,ANQVATGIR,VLGEKPELPDGGDDDDIIADISNRK,GASQEEEKGAEYVASVLK,RNLASITR,MYLETDPSGR,LKANQVATGIR,NTQIQVLPEGGETPIFK,GRSELIVVEEGSEPSELIK
P34897-2	SHMT2	serine hydroxymethyltransferase, mitochondrial isoform 2 precursor	271	626	0.41	0.89	0.56152	1.4384	6	13	6	12	16.5	31.3	LIIAGTSAYAR,AALEALGSCLNNK,HADIVTTTTHK,VVDFIDEGVNIGLEVK,ISATSIFFESMPYK,YYGGAEVVDEIELLCQR	VLELVSITANK,LIIAGTSAYAR,GWTGQESLSDSDPEMWELLQR,AFPMPGFDEH,HADIVTTTTHK,AALEALGSCLNNK,AMADALLER,VVDFIDEGVNIGLEVK,ISATSIFFESMPYK,YYGGAEVVDEIELLCQR,GLELIASENFCSR,YSEGYPGKR
P30041	PRDX6	Peroxiredoxin-6	121	207	0.28	0.885	0.35936	1.1544	3	7	3	6	19.6	41.5	PGGLLLGDVAPNFEANTTVGR,GVFTKELPSGK,DFTPVCTTELGR	PGGLLLGDVAPNFEANTTVGR,GVFTKELPSGK,NFDEILR,VATPVDWKDGDSVMVLPTIPEEEAK,DFTPVCTTELGR,ELAILLGMLDPAEKDEK
P02533	KRT14	Keratin, type I cytoskeletal 14	144	381.5	0.2	0.885	0.22528	0.50475	3	15	3	10	6.5	12.9	LAADDFR,VTMQNLNDR,APSTYGGGLSVSSSR	LAADDFR,LEQEIATYR,MSVEADINGLRR,TEELNR,VLDELTLAR,VTMQNLNDR,LASYLDKVR,MSVEADINGLR,RVLDELTLAR,LASYLDK
O75396	SEC22B	Vesicle-trafficking protein SEC22b	147	240	0.46	0.88	1.0309	1.4245	3	5	3	5	23.7	27.9	LNEQSPTR,NLGSINTELQDVQR,VADGLPLAASMQEDEQSGRDLQQYQSQAK	LNEQSPTR,NLGSINTELQDVQR,VADGLPLAASMQEDEQSGRDLQQYQSQAK,DLQQYQSQAK,ANNLSSLSK
P35241-5	RDX	radixin isoform 1	291	502	0.43	0.88	0.51178	0.91448	9	13	8	12	13.2	20.8	ENPLQFK,APDFVFYAPR,SEEERVTETQKNER,RKPDTIEVQQMK,VTTMDAELEFAIQPNTTGK,QLFDQVVK,IGFPWSEIR,KAPDFVFYAPR	ENPLQFK,APDFVFYAPR,RKPDTIEVQQMK,SEEERVTETQKNER,VTTMDAELEFAIQPNTTGK,KTQNDVLHAENVK,LFFLQVK,QLQALSSELAQARDETK,KALELDQER,QLFDQVVK,IGFPWSEIR,KAPDFVFYAPR
P13073	COX4I1	Cytochrome c oxidase subunit 4 isoform 1, mitochondrial precursor	32	124	0.17	0.88	0.19378	1.0309	1	4	1	4	4.1	26	HLSASQK	ASWSSLSMDEKVELYR,DHPLPEVAHVK,HLSASQK,FKESFAEMNR
P26641-2	EEF1G	unnamed protein product	494	415.5	0.97	0.87	1.6827	1.2759	14	16	13	15	27.1	31	QATENAKEEVRR,KLDPGSEETQTLVR,TFLVGER,TPEFLR,ALIAAQYSGAQVR,FAETQPK,QAFPNTNR,EYFSWEGAFQHVGK,KFAETQPK,STFVLDEFKR,MAQFDAK,ILGLLDAYLK,KAAAPAPEEEMDECEQALAAEPK	QATENAKEEVRR,KLDPGSEETQTLVR,TPEFLR,TFLVGER,QVLEPSFR,ALIAAQYSGAQVR,FAETQPK,QAFPNTNR,EYFSWEGAFQHVGK,MAQFDAK,STFVLDEFKR,KAAAPAPEEEMDECEQALAAEPK,ILGLLDAYLK,WFLTCINQPQFR,LDPGSEETQTLVR
P31150	GDI1	Rab GDP dissociation inhibitor alpha	282	382	0.55	0.87	0.77828	0.95734	11	11	8	8	14.3	18.7	GRDWNVDLIPK,MLLYTEVTR,LYSESLAR,FLMANGQLVK,FQLLEGPPESMGR,DWNVDLIPK,KQNDVFGEAEQ,IKLYSESLAR	GRDWNVDLIPK,MLLYTEVTR,LYSESLAR,FLVFVANFDENDPK,FLMANGQLVK,NTNDANSCQIIIPQNQVNR,IKLYSESLAR,KQNDVFGEAEQ
P22314-2	UBA1	Isoform 2 of Ubiquitin-like modifier-activating enzyme 1	984	926.5	0.8	0.865	1.5342	1.3521	23	36	22	32	29.4	40.9	LKSDTAAAAVR,NIILGGVK,AVTLHDQGTAQWADLSSQFYLREEDIGK,LVVADTR,ALPAVQQNNLDEDLIR,QFLFRPWDVTK,DNPGVVTCLDEAR,LAGTQPLEVLEAVQR,NEEDAAELVALAQAVNAR,LQTSSVLVSGLR,ERLDQPMTEIVSR,GLGVEIAK,KPLLESGTLGTK,LDQPMTEIVSR,AENYDIPSADR,IHVSDQELQSANASVDDSRLEELK,ATLPSPDKLPGFK,GNVQVVIPFLTESYSSSQDPPEK,QNRYDGQVAVFGSDLQEK,VGEFCHNR,NRAEVSQPR,ALVLELCCNDESGEDVEVPYVR	GGIVSQVKVPK,YDGQVAVFGSDLQEK,YFLVGAGAIGCELLK,NIILGGVK,AVTLHDQGTAQWADLSSQFYLREEDIGK,LVVADTR,SLVASLAEPDFVVTDFAK,LAGTQPLEVLEAVQR,NEEDAAELVALAQAVNAR,LQTSSVLVSGLR,GLGVEIAK,LDQPMTEIVSR,AENYDIPSADR,QNRYDGQVAVFGSDLQEK,CVYYR,NRAEVSQPR,ALVLELCCNDESGEDVEVPYVR,LKSDTAAAAVR,AAVATFLQSVQVPEFTPK,ALPAVQQNNLDEDLIR,NGSEADIDEGLYSR,DEFEGLFKQPAENVNQYLTDPK,GGIVSQVK,AENYDIPSADRHK,DNPGVVTCLDEAR,ERLDQPMTEIVSR,KPLLESGTLGTK,I…
Q15907-2	RAB11B	unnamed protein product	138	194	0.59	0.86	0.70125	1.0309	3	4	3	4	16.2	23.4	AITSAYYR,AQIWDTAGQER,STIGVEFATR	AITSAYYR,GAVGALLVYDIAK,AQIWDTAGQER,STIGVEFATR
P00505	GOT2	aspartate aminotransferase, mitochondrial isoform 1 precursor	286	448.5	0.46	0.86	0.66762	1.0629	10	14	9	12	21.6	30.6	ASAELALGENSEVLK,TQLVSNLKK,IAAAILNTPDLR,IAAAILNTPDLRK,DAGMQLQGYR,NLDKEYLPIGGLAEFCK,EIATVVK,NMGLYGER,FVTVQTISGTGALR	ASAELALGENSEVLK,TQLVSNLKK,IGASFLQR,IAAAILNTPDLR,IAAAILNTPDLRK,DAGMQLQGYR,NLDKEYLPIGGLAEFCK,EIATVVK,NMGLYGER,FVTVQTISGTGALR,TCGFDFTGAVEDISK,ILIRPMYSNPPLNGAR
P27695	APEX1	DNA-(apurinic or apyrimidinic site) lyase	181	255	0.55	0.85	1.2539	1.5809	6	7	6	7	24.2	27.6	KGAVAEDGDELRTEPEAK,NAGFTPQER,ICSWNVDGLR,GLDWVKEEAPDILCLQETK,KNDKEAAGEGPALYEDPPDQK,GAVAEDGDELRTEPEAK	KGAVAEDGDELRTEPEAK,NAGFTPQER,ICSWNVDGLR,GLDWVKEEAPDILCLQETK,TSPSGKPATLK,KNDKEAAGEGPALYEDPPDQK,GAVAEDGDELRTEPEAK
P62913-2	RPL11	60S ribosomal protein L11 isoform 2	77	264	0.36	0.85	0.6681	2.5938	2	6	2	6	10.7	27.1	YDGIILPGK,GAKAEEILEK	AEEILEK,VREYELR,IAVHCTVR,VLEQLTGQTPVFSK,YDGIILPGK,GAKAEEILEK
Q13011	ECH1	delta(3,5)-Delta(2,4)-dienoyl-CoA isomerase, mitochondrial precursor	143	352	0.09	0.85	0.6681	1.7826	5	9	5	9	16.1	30.7	TVTFSKL,AVVISGAGK,KMMADEALGSGLVSR,SVQATTENKELK,YQETFNVIER	TVTFSKL,AVVISGAGK,EVDVGLAADVGTLQR,KMMADEALGSGLVSR,SVQATTENKELK,YQETFNVIER,SPVAVQSTK,EMVECFNK,VIGNQSLVNELAFTAR
P55072	VCP	Transitional endoplasmic reticulum ATPase	806	732	0.77	0.835	1.4561	1.4535	19	32	19	29	23.8	39	LGDVISIQPCPDVK,GILLYGPPGTGK,GDIFLVR,GVLFYGPPGCGK,QTNPSAMEVEEDDPVPEIRR,MDELQLFR,GGNIGDGGGAADR,MDELQLFRGDTVLLK,LIVDEAINEDNSVVSLSQPK,DVDLEFLAK,VRLGDVISIQPCPDVK,DHFEEAMR,LAGESESNLR,SPVAKDVDLEFLAK,AIANECQANFISIK,WALSQSNPSALR,ESIESEIRR,LAGESESNLRK,RSVSDNDIR	LGDVISIQPCPDVK,GILLYGPPGTGK,GDIFLVR,GVLFYGPPGCGK,LIVDEAINEDNSVVSLSQPKMDELQLFR,LDQLIYIPLPDEK,EAVCIVLSDDTCSDEKIR,MDELQLFR,GGNIGDGGGAADR,LIVDEAINEDNSVVSLSQPK,DVDLEFLAK,VRLGDVISIQPCPDVK,SPVAKDVDLEFLAK,WALSQSNPSALR,LAGESESNLRK,ERQTNPSAMEVEEDDPVPEIR,AIGVKPPR,EVDIGIPDATGR,QTNPSAMEVEEDDPVPEIRR,VINQILTEMDGMSTKK,ELQELVQYPVEHPDKFLK,MDELQLFRGDTVLLK,DHFEEAMR,LAGESESNLR,AIANECQANFISIK,ETVVEVPQVTWEDIGGLEDVKR,MT…
Q13347	EIF3I	Eukaryotic translation initiation factor 3 subunit I	163	284	0.41	0.83	0.89574	1.1544	5	7	5	7	17.5	20.6	SYSSGGEDGYVR,LFDSTTLEHQK,FFHLAFEEEFGR,SGEVLVNVKEHSR,QINDIQLSR	SGEVLVNVK,SYSSGGEDGYVR,LFDSTTLEHQK,FFHLAFEEEFGR,DMTMFVTASK,SGEVLVNVKEHSR,QINDIQLSR
Q14847-2	LASP1	Lasp1 protein	107	236	0.19	0.83	0.63789	1.2758	3	6	3	6	12	17.6	LKQQSELQSQVR,MGPSGGEGMEPERR,GFSVVADTPELQR	TQDQISNIK,MGPSGGEGMEPERR,LKQQSELQSQVR,DSQDGSSYR,GFSVVADTPELQR,QQSELQSQVR
Q7Z4W1	DCXR	L-xylulose reductase isoform 1	175	314	0.62	0.82	0.9307	2.1623	4	7	4	7	22.5	35.6	TQADLDSLVR,RVLVTGAGK,GVPGAIVNVSSQCSQR,ECPGIEPVCVDLGDWEATER	GTVQALHATGAR,RVLVTGAGK,TQADLDSLVR,GALDMLTK,GVPGAIVNVSSQCSQR,ECPGIEPVCVDLGDWEATER,AVTNHSVYCSTK
P61158	ACTR3	actin-related protein 3 isoform 1	206	332	0.49	0.82	0.77828	1.8184	6	10	5	9	15	30.1	DYEEIGPSICR,FMEQVIFK,NIVLSGGSTMFR,EFSIDVGYER,GVDDLDFFIGDEAIEKPTYATK	DYEEIGPSICR,FMEQVIFK,QYTGINAISK,HGIVEDWDLMER,LGYAGNTEPQFIIPSCIAIK,NIVLSGGSTMFR,EFSIDVGYER,GVDDLDFFIGDEAIEKPTYATK,AEPEDHYFLLTEPPLNTPENR
Q9NQG5	RPRD1B	regulation of nuclear pre-mRNA domain-containing protein 1B	141	338	0.29	0.82	0.58489	1.5119	3	7	3	6	11	25.1	SVYGGEFIQQLK,LAAELEDR,ALQDLENAASGDATVR	TVDEACLLLAEYNGR,SVYGGEFIQQLK,IASLPQEVQDVSLLEK,LLNIWQER,ALQDLENAASGDATVR,EFESVLVDAFSHVAR
P09467	FBP1	Fructose-1,6-bisphosphatase 1	132	232	0.29	0.82	0.83298	1.0691	3	7	3	6	15.3	18.9	STDEPSEKDALQPGR,LLYECNPMAYVMEK,AGGMATTGKEAVLDVIPTDIHQR	YVGSMVADVHR,KSTDEPSEKDALQPGR,STDEPSEKDALQPGR,LLYECNPMAYVMEK,EAVLDVIPTDIHQR,AGGMATTGKEAVLDVIPTDIHQR
Q15365	PCBP1	Poly(RC)-binding protein 1	247.67	341.67	0.56333	0.81667	1.1235	1.2166	9	13	9	9	41.8	43.2	IANPVEGSSGR,CSDAAGYPHATHDLEGPPLDAYSIQGQHTISPLDLAK,ESTGAQVQVAGDMLPNSTER,QGANINEIRQMSGAQIK,QGANINEIR,VMTIPYQPMPASSPVICAGGQDR,LVVPATQCGSLIGK,AITIAGVPQSVTECVK,INISEGNCPER	IANPVEGSSGR,CSDAAGYPHATHDLEGPPLDAYSIQGQHTISPLDLAK,ESTGAQVQVAGDMLPNSTER,QGANINEIR,VMTIPYQPMPASSPVICAGGQDR,LVVPATQCGSLIGK,AITIAGVPQSVTECVK,IITLTGPTNAIFK,INISEGNCPER
P62140	PPP1CB	serine/threonine-protein phosphatase PP1-beta catalytic subunit isoform 1	131	261	0.4	0.8	0.50131	0.96842	3	6	3	6	10.3	19.2	IVQMTEAEVR,GNHECASINR,AHQVVEDGYEFFAK	IVQMTEAEVR,IYGFYDECK,IFCCHGGLSPDLQSMEQIR,GNHECASINR,AHQVVEDGYEFFAKR,AHQVVEDGYEFFAK
P56537	EIF6	eukaryotic translation initiation factor 6 isoform a	132	153	0.42	0.79	1.1544	1.1544	3	6	3	3	17.1	17.1	ASFENNCEIGCFAK,HGLLVPNNTTDQELQHIR,NSLPDTVQIR	ASFENNCEIGCFAK,HGLLVPNNTTDQELQHIR,NSLPDTVQIR
O95831-3	AIFM1	apoptosis-inducing factor 1, mitochondrial isoform 2 precursor	379	650	0.34	0.78	1.0962	1.4709	9	13	9	12	17.4	24.3	LNDGSQITYEK,VNAELQAR,TGGLEIDSDFGGFR,SATEQSGTGIR,ELWFSDDPNVTK,VVQLDVR,ISGLGLTPEQK,VLIVSEDPELPYMRPPLSK,ALGTEVIQLFPEK	LNDGSQITYEK,VNAELQAR,TGGLEIDSDFGGFR,KVETDHIVAAVGLEPNVELAK,SATEQSGTGIR,ELWFSDDPNVTK,ALGTEVIQLFPEKGNMGK,VVQLDVR,SNIWVAGDAACFYDIK,ISGLGLTPEQK,ALGTEVIQLFPEK,VLIVSEDPELPYMRPPLSK
Q53H82	LACTB2	Beta-lactamase-like protein 2	78	252	0.21	0.78	0.35936	1.9286	2	7	2	7	7.2	26.3	SINNDTTYCIK,IFSNTDPDKK	SINNDTTYCIK,SFTVMELVK,IFSNTDPDKK,IQQYISHR,ILIDTGEPAIPEYISCLK,EQQILTLFR,DHSGGIGDICK
P49411	TUFM	elongation factor Tu, mitochondrial	343.5	409.33	0.72	0.77667	0.75671	1.0846	14	21	14	20	31.1	47.5	KGDECELLGHSK,DLEKPFLLPVEAVYSVPGR,YEEIDNAPEER,KYEEIDNAPEER,VEAQVYILSK,FNLILR,GITINAAHVEYSTAAR,SLERAEAGDNLGALVR,ILAEGGGAK,GTVVTGTLER,AEAGDNLGALVR,TVVTGIEMFHK,ADAVQDSEMVELVELEIR,FKKYEEIDNAPEER	KGDECELLGHSK,GDECELLGHSK,EHLLLAR,DLEKPFLLPVEAVYSVPGR,YEEIDNAPEER,KYEEIDNAPEER,VEAQVYILSK,FNLILR,TIGTGLVTNTLAMTEEEK,GITINAAHVEYSTAAR,SLERAEAGDNLGALVR,ILAEGGGAK,GTVVTGTLER,AEAGDNLGALVR,TVVTGIEMFHK,QIGVEHVVVYVNK,ADAVQDSEMVELVELEIR,NMITGTAPLDGCILVVAANDGPMPQTR,TTLTAAITK,FKKYEEIDNAPEER
P02786	TFRC	Transferrin receptor protein 1	737	656	0.63	0.775	1.3556	1.6792	16	27	16	26	26.8	41.5	EAGSQKDENLALYVENQFREFK,DSAQNSVIIVDKNGR,ILNIFGVIK,LLNENSYVPR,GFVEPDHYVVVGAQR,VSASPLLYTLIEK,EAGSQKDENLALYVENQFR,SSGLPNIPVQTISR,LAQMFSDMVLKDGFQPSR,VEYHFLSPYVSPK,LAVDEEENADNNTK,LVYLVENPGGYVAYSK,SGVGTALLLK,LTTDFGNAEK,SAFSNLFGGEPLSYTR,DAWGPGAAK	DSAQNSVIIVDKNGR,GFVEPDHYVVVGAQR,LLNENSYVPR,EAGSQKDENLALYVENQFR,LSEKLDSTDFTGTIK,YNSQLLSFVR,QVDGDNSHVEMK,VEYHFLSPYVSPK,LAQMFSDMVLKDGFQPSR,LAVDEEENADNNTK,SGVGTALLLK,LVYLVENPGGYVAYSK,RLYWDDLK,LTVSNVLK,LFGNMEGDCPSDWKTDSTCR,LAGTESPVREEPGEDFPAAR,AFTYINLDK,ILNIFGVIK,VSASPLLYTLIEK,SSGLPNIPVQTISR,DLNQYR,LAVDEEENADNNTKANVTKPK,LAQMFSDMVLK,LTTDFGNAEK,SAFSNLFGGEPLSYTR,DAWGPGAAK
O95292	VAPB	vesicle-associated membrane protein-associated protein B/C isoform 1	87	266	0.26	0.77	0.58489	1.9286	2	7	2	7	11.5	28.3	IISTTASKTETPIVSK,GPFTDVVTTNLK	SLSSSLDDTEVKK,IISTTASKTETPIVSK,VEQVLSLEPQHELK,LQGEVQR,GPFTDVVTTNLK,TETPIVSK,LGNPTDR
Q99426-2	TBCB	tubulin-folding cofactor B isoform 2	98	209	0.53	0.76	1.0309	1.4245	3	4	3	4	24.8	31	YTISQEAYDQRQDTVR,LAEEKAQASSIPVGSR,YNEEERAQQEAEAAQR	YTISQEAYDQRQDTVR,LGEYEDVSRVEK,LAEEKAQASSIPVGSR,YNEEERAQQEAEAAQR
P36873-2	PPP1CC	serine/threonine-protein phosphatase PP1-gamma catalytic subunit isoform 2	100	245	0.38	0.76	0.43845	0.83298	3	6	3	6	10	18.6	NVQLQENEIR,GNHECASINR,AHQVVEDGYEFFAK	IYGFYDECK,IFCCHGGLSPDLQSMEQIR,NVQLQENEIR,GNHECASINR,AHQVVEDGYEFFAKR,AHQVVEDGYEFFAK
P50995-2	ANXA11	annexin A11 isoform 2	245	486	0.36	0.75	0.9307	1.9936	5	8	5	8	13.3	23.3	DAQELYAAGENR,LGTDESKFNAVLCSR,SETDLLDIR,TPVLFDIYEIK,SLYHDISGDTSGDYRK	DAQELYAAGENR,GVGTDEACLIEILASR,LGTDESKFNAVLCSR,QQILLSFK,SETDLLDIR,TPVLFDIYEIK,LLISLSQGNRDESTNVDMSLAQR,SLYHDISGDTSGDYRK
Q01813	PFKP	ATP-dependent 6-phosphofructokinase, platelet type isoform 1	268	496	0.3	0.75	0.51991	1.0092	6	17	6	12	8.6	17	LAIKLPDDQIPK,GGTPSAFDR,AIGVLTSGGDAQGMNAAVR,TFVLEVMGR,EWSGLLEELAR,AMEWITAK	LAIKLPDDQIPK,GGTPSAFDR,MLAIYDGFDGFAK,AACNLLQR,TFVLEVMGR,AIGVLTSGGDAQGMNAAVR,EWSGLLEELAR,NVIFQPVAELK,AMEWITAK,NGQIDKEAVQK,KEWSGLLEELAR,TNCNVAVINVGAPAAGMNAAVR
Q9Y6C9	MTCH2	Mitochondrial carrier homolog 2	73	259	0.2	0.75	0.3895	2.1623	2	6	2	6	7.2	21.4	GLFTGLTPR,LCSGVLGTVVHGK	SMVQFIGR,GLFTGLTPR,LCSGVLGTVVHGK,GNSLFFR,TYCCDLK,VLQHYQESDKGEELGPGNVQK
P38117	ETFB	electron transfer flavoprotein subunit beta isoform 1	53	189		0.75	0.3895	1.2758	2	5	2	5	6.6	21.1	EIDGGLETLR,VIDYAVK	IEVIKPGDLGVDLTSK,TGVVTDGVK,EIDGGLETLR,VIDYAVK,LSVISVEDPPQR
P20073-2	ANXA7	annexin A7 isoform 1	378	360	0.88	0.74	1.3101	1.2656	9	12	8	11	20.3	25.7	QMFAQMYQK,GFGTDEQAIVDVVANR,TLGTMIAGDTSGDYRR,EFSGYVESGLK,SEIDLVQIK,GAGTDDSTLVR,LGTDESCFNMILATR,DLLSSVSR	QMFAQMYQK,ATMEAYSR,GFGTDEQAIVDVVANR,LLLAIVGQ,TLGTMIAGDTSGDYRR,EFSGYVESGLK,VLIEILCTR,GAGTDDSTLVR,SEIDLVQIK,LGTDESCFNMILATR,DLLSSVSR
P50213	IDH3A	isocitrate dehydrogenase [NAD] subunit alpha, mitochondrial precursor	264	393	0.49	0.74	0.83298	1.3357	6	9	6	9	14.4	24.5	IAEFAFEYAR,IFDAAKAPIQWEER,APIQWEER,MSDGLFLQK,CSDFTEEICRR,LITEGASKR	IAEFAFEYAR,IFDAAKAPIQWEER,IEAACFATIKDGK,MSDGLFLQK,APIQWEER,EVAESCKDIK,CSDFTEEICR,CSDFTEEICRR,ENTEGEYSGIEHVIVDGVVQSIK
P08865	RPSA	40S ribosomal protein SA isoform 1	116.33	290	0.42333	0.74	1.0247	1.5782	8	7	5	6	26.4	35.5	YVDIAIPCNNK,FAAATGATPIAGR,LLVVTDPR,EHPWEVMPDLYFYRDPEEIEKEEQAAAEK,AIVAIENPADVSVISSR	YVDIAIPCNNK,FAAATGATPIAGR,ADHQPLTEASYVNLPTIALCNTDSPLR,LLVVTDPR,EHPWEVMPDLYFYRDPEEIEKEEQAAAEK,AIVAIENPADVSVISSR
P35270	SPR	Sepiapterin reductase	53	213	0.25	0.74	0.33352	1.3714	2	5	2	5	8.8	25.2	NDEALRQLEAELGAER,QLEAELGAERSGLRVVR	LLLINNAGSLGDVSK,NDEALRQLEAELGAER,SGAHVDFYDK,DMLFQVLALEEPNVR,AVCLLTGASR
P46782	RPS5	40S ribosomal protein S5	127	136	0.72	0.72	0.6681	1.1544	4	4	4	4	9.3	12.7	QAVDVSPLR,QAVDVSPLRR,AQCPIVER,KAQCPIVER	QAVDVSPLR,AQCPIVER,YLPHSAGR,KAQCPIVER
P35232	PHB	prohibitin isoform 1	229	213	0.53	0.72	0.71907	0.86295	5	7	5	7	19.1	27.9	FDAGELITQR,AAIISAEGDSK,IFTSIGEDYDER,FDAGELITQRELVSR,KLEAAEDIAYQLSR	VLPSITTEILK,AAIISAEGDSK,FDAGELITQR,IFTSIGEDYDER,KLEAAEDIAYQLSR,QVAQQEAER,QVSDDLTER
P09110	ACAA1	3-ketoacyl-CoA thiolase, peroxisomal isoform a	339	300	0.9	0.71	1.5809	1.688	9	12	8	11	25.4	39.8	ARDCLIPMGITSENVAER,EKQDTFALASQQK,GNPGNITSR,SKAEELGLPILGVLR,GCFQAEIVPVTTTVHDDKGTKR,QVITLLNELK,DCLIPMGITSENVAER,SITVTQDEGIRPSTTMEGLAK	EKQDTFALASQQK,KDGSTTAGNSSQVSDGAAAILLAR,GNPGNITSR,SKAEELGLPILGVLR,VNPLGGAVALGHPLGCTGAR,GCFQAEIVPVTTTVHDDKGTKR,IAQFLSDIPETVPLSTVNR,QVITLLNELK,DGSTTAGNSSQVSDGAAAILLAR,DCLIPMGITSENVAER,SITVTQDEGIRPSTTMEGLAK
P28066	PSMA5	proteasome subunit alpha type-5 isoform 1	58	222	0.27	0.71	0.51991	1.3609	2	7	2	7	9.1	30.2	SEYDRGVNTFSPEGR,SSLIILK	ITSPLMEPSSIEK,SEYDRGVNTFSPEGR,TLIDKAR,GVNTFSPEGR,SSLIILK,LFQVEYAIEAIK,AIGSASEGAQSSLQEVYHK
Q04837	SSBP1	single-stranded DNA-binding protein, mitochondrial precursor	39	128	0.2	0.71	0.25893	0.99526	1	3	1	3	5.4	29.7	VGQDPVLR	VGQDPVLR,QATTIIADNIIFLSDQTKEKE,SGDSEVYQLGDVSQK
P08133-2	ANXA6	annexin A6 isoform 2	1090	481.5	2.93	0.7	2.5112	0.93641	32	20	28	20	47.5	35.5	ALLALCGGED,GLGTDEDTIIDIITHR,LVFDEYLK,SELDMLDIREIFR,LIVGLMRPPAYCDAK,GTVRPANDFNPDADAK,STPEYFAER,AMEGAGTDEKALIEILATR,EDAQVAAEILEIADTPSGDKTSLETR,SLHQAIEGDTSGDFLK,GAGTDEKTLTR,LILGLMMPPAHYDAK,SEIDLLNIRR,DAYERDLEADIIGDTSGHFQK,SELDMLDIR,KAMEGAGTDEKALIEILATR,VFQEFIK,SLEDALSSDTSGHFR,DAFVAIVQSVK,SEISGDLAR,VELKGTVRPANDFNPDADAK,FMTILCTR,ALIEILATR,AMKGLGTDEDTIIDIITHR,DLMTDLKSEISGDLAR,EMSGDVRDAFVAIVQSVK,AINEAYK…	STPEYFAER,TNEQMHQLVAAYK,TTGKPIEASIR,SLHQAIEGDTSGDFLK,SEIDLLNIRR,SELDMLDIR,WGTDEAQFIYILGNR,ALLALCGGED,SEIDLLNIR,GLGTDEDTIIDIITHR,VFQEFIK,LVFDEYLK,SLEDALSSDTSGHFR,DAFVAIVQSVK,CLIEILASR,ALIEILATR,DLEADIIGDTSGHFQK,GTVRPANDFNPDADAK,GFGSDKEAILDIITSR,AINEAYKEDYHK
Q9H9B4	SFXN1	Sideroflexin-1	196	307	0.42	0.7	0.71907	0.96842	4	5	4	5	12.4	19.2	QAITQVVVSR,HVSPLIGR,NILLTNEQLESAR,WDQSTFIGR	QAITQVVVSR,QGIVPPGLTENELWR,SSMSVTSLEAELQAK,NILLTNEQLESAR,WDQSTFIGR
P62701	RPS4X	40S ribosomal protein S4, X isoform X isoform	107	197	0.37	0.7	0.27427	0.83298	3	5	3	5	8.7	16.3	KIFVGTK,IGVITNR,LSNIFVIGK	IGVITNR,LSNIFVIGK,LTIAEER,TIRYPDPLIK,DANGNSFATR
P00558-2	PGK1	unnamed protein product	134	320.5	0.22	0.7	0.58156	1.0993	6	13	6	13	19	38.3	ELNYFAK,WNTEDKVSHVSTGGGASLELLEGK,IQLINNMLDK,VLPGVDALSNI,YAEAVTR,LGDVYVNDAFGTAHR	ITLPVDFVTADKFDENAK,IQLINNMLDK,YAEAVTR,ACANPAAGSVILLENLR,GCITIIGGGDTATCCAK,ALESPERPFLAILGGAK,KYAEAVTR,ELNYFAK,VLPGVDALSNI,LGDVYVNDAFGTAHR,FHVEEEGKGK,DCVGPEVEK,AEPAKIEAFR
Q9BR76	CORO1B	Coronin-1B	251	455	0.34	0.69	0.71907	1.5809	6	10	5	9	14.5	27.8	NDQCYEDIR,RGTLVAER,DADPILISLR,KSDLFQDDLYPDTAGPEAALEAEEWVSGR,AGEAGKLEEVMQELR	NDQCYEDIR,VTWDSTFCAVNPK,RGTLVAER,LEEQLGR,NVLSDSRPAMAPGSSHLGAPASTTTAADATPSGSLAR,KSDLFQDDLYPDTAGPEAALEAEEWVSGR,DADPILISLR,AGEAGKLEEVMQELR,AIFLADGK
P62424	RPL7A	60S ribosomal protein L7a	79	188	0.11	0.69	0.4251	1.4245	2	5	2	5	7.8	23.3	NFGIGQDIQPK,HWGGNVLGPK	NFGIGQDIQPK,TCTTVAFTQVNSEDKGALAK,AGVNTVTTLVENK,VVNPLFEK,HWGGNVLGPK
P62241	RPS8	40S ribosomal protein S8	99	160	0.29	0.685	0.99526	1.8371	2	5	2	5	13.9	27.4	ADGYVLEGKELEFYLR,ISSLLEEQFQQGK	ADGYVLEGKELEFYLR,LTPEEEEILNK,LTPEEEEILNKKR,IIDVVYNASNNELVR,ISSLLEEQFQQGK
P61106	RAB14	Ras-related protein Rab-14	127	189	0.48	0.68	0.63789	0.9307	3	5	3	5	16.2	33.9	TGENVEDAFLEAAKK,LQIWDTAGQER,LTSEPQPQR	IIEVSGQK,IYQNIQDGSLDLNAAESGVQHKPSAPQGGR,TGENVEDAFLEAAKK,LQIWDTAGQER,LTSEPQPQR
Q8NBS9-2	TXNDC5	thioredoxin domain-containing protein 5 isoform 3	226	315	0.41	0.68	1.0691	1.3357	6	7	6	7	24.3	24.6	FVLSQAKDEL,EYVESQLQR,VDCTAHSDVCSAQGVR,IAEVDCTAER,TETGATETVTPSEAPVLAAEPEADK,GYPTLLLFR	FVLSQAKDEL,EYVESQLQR,VDCTAHSDVCSAQGVR,ALAPTWEQLALGLEHSETVK,IAEVDCTAER,DLESLREYVESQLQR,GYPTLLLFR
P02545	LMNA	lamin isoform A	568	751	0.41	0.68	0.61921	1.2327	9	16	9	15	15.8	25.7	LLEGEEER,SVGGSGGGSFGDNLVTR,NSNLVGAAHEELQQSR,SGAQASSTPLSPTR,SLETENAGLR,ITESEEVVSR,TALINSTGEEVAMR,LADALQELR,LAVYIDR	LLEGEEER,SVGGSGGGSFGDNLVTR,LRDLEDSLAR,NSNLVGAAHEELQQSR,LSPSPTSQR,SGAQASSTPLSPTR,SLETENAGLR,AAYEAELGDAR,LKDLEALLNSK,LQEKEDLQELNDR,AQNTWGCGNSLR,ITESEEVVSR,TALINSTGEEVAMR,LADALQELR,LAVYIDR
P55884-2	EIF3B	Isoform 2 of Eukaryotic translation initiation factor 3 subunit B	363	706	0.3	0.68	0.72521	1.4816	8	16	8	15	13.2	24.1	GYIFLEYASPAHAVDAVK,FSHQGVQLIDFSPCER,GIALWGGEK,NLFNVVDCK,MTLDTLSIYETPSMGLLDKK,TSIFWNDVKDPVSIEER,GTQGVVTNFEIFR,AQAVSEDAGGNEGR	MAQELYMEQK,ITNDFYPEEDGKTK,GTYLATFHQR,GIALWGGEK,NADGYKLDK,TSIFWNDVKDPVSIEER,NLFNVVDCK,AQAVSEDAGGNEGR,MAQELYMEQKNER,YWLEEAECRDQYSVIFESGDR,GYIFLEYASPAHAVDAVK,FSHQGVQLIDFSPCER,GTQGVVTNFEIFR,MTLDTLSIYETPSMGLLDKK,DRPQEADGIDSVIVVDNVPQVGPDRLEK
P53597	SUCLG1	succinyl-CoA ligase [ADP/GDP-forming] subunit alpha, mitochondrial precursor	83	242	0.19	0.68	0.4251	1.8943	2	6	2	6	7.2	21.9	IICQGFTGK,LIGPNCPGVINPGECK	IICQGFTGK,QGTFHSQQALEYGTK,LVGGTTPGK,GGQTHLGLPVFNTVK,MGHAGAIIAGGK,LIGPNCPGVINPGECK
P83731	RPL24	60S ribosomal protein L24	71	107	0.19	0.68	0.33352	0.77828	1	3	1	2	8.2	13.3	AITGASLADIMAK	CESAFLSK,AITGASLADIMAK
P07339	CTSD	cathepsin D preproprotein	156.5	235	0.455	0.66667	0.72299	1.066	8	13	6	11	20.6	33.7	EGCEAIVDTGTSLMVGPVDEVRELQK,VSTLPAITLK,AIGAVPLIQGEYMIPCEK,GYKLSPEDYTLK,FDGILGMAYPR,VGFAEAAR	QVFGEATK,EGCEAIVDTGTSLMVGPVDEVRELQK,QVFGEATKQPGITFIAAK,VSTLPAITLK,AIGAVPLIQGEYMIPCEK,GYKLSPEDYTLK,DPDAQPGGELMLGGTDSK,FDGILGMAYPR,VGFAEAARL,ISVNNVLPVFDNLMQQK,VGFAEAAR
P25788-2	PSMA3	proteasome subunit alpha type-3 isoform 2	63	188	0.4	0.665	0.63789	1.2759	2	9	2	9	9.2	33.8	VFQVEYAMK,SLADIAREEASNFR	DIVKEVAK,SNFGYNIPLK,LYEEGSNKR,CKDGVVFGVEK,AVENSSTAIGIR,DIREEAEKYAK,DIREEAEK,VFQVEYAMK,SLADIAREEASNFR
Q00839-2	HNRNPU	Heterogeneous nuclear ribonucleoprotein U isoform b	348	521	0.38	0.65	0.74753	1.3101	9	12	8	11	13.6	21.8	SSGPTSLFAVTVAPPGAR,GYFEYIEENKYSR,MCLFAGFQR,EKPYFPIPEEYTFIQNVPLEDR,NGQDLGVAFK,FIEIAAR,KAEVEGKDLPEHAVLK,NFILDQTNVSAAAQR	SSGPTSLFAVTVAPPGAR,GYFEYIEENKYSR,LQAALDDEEAGGRPAMEPGNGSLDLGGDSAGR,MCLFAGFQR,EKPYFPIPEEYTFIQNVPLEDR,HAAENPGKYNILGTNTIMDK,NGQDLGVAFK,KAEVEGKDLPEHAVLK,QMADTGKLNTLLQR,FIEIAAR,NFILDQTNVSAAAQR
P13489	RNH1	Ribonuclease inhibitor	279	464	0.36	0.64	0.53174	0.97832	5	9	5	9	17.5	28.1	ELTVSNNDINEAGVR,VNPALAELNLR,LGDVGMAELCPGLLHPSSR,ELCQGLGQPGSVLR,SNELGDVGVHCVLQGLQTPSCK	ELTVSNNDINEAGVR,LQLEYCSLSAASCEPLASVLR,LGDVGMAELCPGLLHPSSR,LESCGVTSDNCR,ESLKELSLAGNELGDEGAR,ELCQGLGQPGSVLR,SNELGDVGVHCVLQGLQTPSCK,ELALGSNK,ELSLAGNELGDEGAR
P52209-2	PGD	6-phosphogluconate dehydrogenase, decarboxylating isoform 3	276	389	0.44	0.63	0.82335	1.2275	6	8	6	8	17.4	21.4	TVSKVDDFLANEAK,AGQAVDDFIEK,YGPSLMPGGNK,GILFVGSGVSGGEEGAR,LVPLLDTGDIIIDGGNSEYR,TIFQGIAAK	SAVENCQDSWR,TVSKVDDFLANEAK,AGQAVDDFIEK,YGPSLMPGGNK,GILFVGSGVSGGEEGAR,VVGAQSLK,LVPLLDTGDIIIDGGNSEYR,TIFQGIAAK
P11234-2	RALB	unnamed protein product	126	176	0.44	0.62	0.70125	1.0309	3	4	3	4	15.7	21	RQVPVEEAR,VIMVGSGGVGK,SKAEEWGVQYVETSAK	RQVPVEEAR,VIMVGSGGVGK,SKAEEWGVQYVETSAK,ANVDKVFFDLMR
Q92598-2	HSPH1	heat shock protein 105 kDa isoform 2	381	740	0.41	0.62	0.6156	1.0535	10	20	10	20	14.1	22.8	LYQECEK,MFEELGQR,MIMQDKLEK,DISTTLNADEAVAR,FVVQNVSAQK,RGPFELEAFYSDPQGVPYPEAK,AFNDPFIQK,VLGTAFDPFLGGK,NHAAPFSK,SVLDAAQIVGLNCLR	MIMQDKLEK,DKLCGPYEK,FVVQNVSAQK,SLDQDPVVR,VLGTAFDPFLGGK,AFNDPFIQK,DVSGKMNR,KSLDQDPVVR,NHAAPFSK,LYQECEK,MFEELGQR,FQEAEERPK,DISTTLNADEAVAR,RGPFELEAFYSDPQGVPYPEAK,GPFELEAFYSDPQGVPYPEAK,FVVQNVSAQKDGEK,LLTETEDWLYEEGEDQAK,SQFEELCAELLQK,FFGKDISTTLNADEAVAR,CTPSVISFGSK
P13667	PDIA4	protein disulfide-isomerase A4 precursor	280	565	0.24	0.62	0.56475	1.2967	7	16	7	15	11.4	21.7	IDATSASVLASR,TQEEIVAK,QLEPVYNSLAK,MDATANDVPSDR,RSPPIPLAK,VDATAETDLAK,KGQAVDYEGSRTQEEIVAK	KGQAVDYEGSR,SPPIPLAK,FIEEHATK,RFDVSGYPTLK,QLEPVYNSLAK,VDATAETDLAK,IDATSASVLASR,FAMEPEEFDSDTLREFVTAFKK,GQAVDYEGSRTQEEIVAK,FDVSGYPTIK,VSQGQLVVMQPEK,KGQAVDYEGSRTQEEIVAK,RSPPIPLAK,MDATANDVPSDR,MDATANDVPSDRYK
P35606-2	COPB2	Coatomer protein complex, subunit beta 2 (Beta prime), isoform CRA_b	287	580	0.21	0.62	0.50131	0.71907	8	14	8	13	10.7	18.2	DFSMADKVLPTIPK,TFEVCDLPVR,HSEVQQANLK,VWQLGSSSPNFTLEGHEK,LPEAAFLAR,GSNNVALGYDEGSIIVK,VFNYNTLER,RIEIQPK	SVNGLAFYDWDNTELIR,TYLPSQVSR,AAESLADPTEYENLFPGLK,TFEVCDLPVR,KNWVVTGADDMQIR,HSEVQQANLK,EAFVVEEWVK,LGREEPAMSMDANGK,VWQLGSSSPNFTLEGHEK,LPEAAFLAR,TGRLPEAAFLAR,GSNNVALGYDEGSIIVK,VFNYNTLER
P60900	PSMA6	proteasome subunit alpha type-6 isoform a	197	239	0.76	0.61	1.1544	1.9928	5	8	5	8	23.1	41	ATAAGVKQTESTSFLEK,ILTEAEIDAHLVALAERD,AINQGGLTSVAVR,QTESTSFLEK,LYQVEYAFK	YGYEIPVDMLCKR,ILTEAEIDAHLVALAERD,AINQGGLTSVAVR,HITIFSPEGR,QTESTSFLEK,ITENIGCVMTGMTADSR,GKDCAVIVTQK,LYQVEYAFK
P52907	CAPZA1	F-actin-capping protein subunit alpha-1	132	217	0.33	0.61	0.58489	0.84785	3	6	3	4	12.5	17.8	LLLNNDNLLR,FITHAPPGEFNEVFNDVR,ESCDSALR	EASDPQPEEADGGLK,LLLNNDNLLR,FITHAPPGEFNEVFNDVR,ESCDSALR
P21266	GSTM3	glutathione S-transferase Mu 3	199	148	1.01	0.605	1.0691	0.43845	6	6	5	5	26.6	18.6	YTCGEAPDYDRSQWLDVK,MAQWGNKPVC,ITQSNAILR,CLDEFPNLK,LLLEFTDTSYEEKR	MAQWGNKPVC,ITQSNAILR,LCYSSDHEK,LLLEFTDTSYEEK,LLLEFTDTSYEEKR
P25705-2	ATP5A1	ATP synthase subunit alpha, mitochondrial isoform c	136	493	0.12	0.6	0.16591	1.1544	2	10	2	10	4.9	24.2	AVDSLVPIGR,ILGADTSVDLEETGR	STVAQLVK,VVDALGNAIDGKGPIGSK,TSIAIDTIINQK,QMSLLLR,TGAIVDVPVGEELLGR,VLSIGDGIAR,AVDSLVPIGR,NVQAEEMVEFSSGLK,ILGADTSVDLEETGR,HALIIYDDLSK
Q12931-2	TRAP1	heat shock protein 75 kDa, mitochondrial isoform 2	435	459.5	0.61	0.59	0.65772	0.76456	11	14	10	13	16.4	20.8	FFEDYGLFMR,ELISNASDALEK,KLNQLR,GVVDSEDIPLNLSR,ELGSSVALYSR,TDAPLNIR,AQLLQPTLEINPR,AFLDALQNQAEASSK,SDCKEFSSEAR,LLDIVAR	FFEDYGLFMR,ELLQESALIR,YVAQAHDKPR,GVVDSEDIPLNLSR,AQLLQPTLEINPR,LLDIVAR,ELISNASDALEK,ELGSSVALYSR,TDAPLNIR,LNELLVK,AFLDALQNQAEASSK,SDCKEFSSEAR,HEFQAETK
O95994	AGR2	Anterior gradient protein 2 homolog precursor	79	121	0.37	0.59	0.58489	0.99526	3	5	2	3	10.2	20.5	LPQTLSR,IMFVDPSLTVR	LYAYEPADTALLLDNMKK,LPQTLSR,IMFVDPSLTVR
P13010	XRCC5	X-ray repair cross-complementing protein 5	342	527	0.36	0.59	0.60372	1.0309	9	14	8	13	13.6	21.7	IKTLFPLIEAK,KKDQVTAQEIFQDNHEDGPTAK,TLFPLIEAK,YAPTEAQLNAVDALIDSMSLAK,YGSDIVPFSKVDEEQMK,HIEIFTDLSSR,VITMFVQR,CFSVLGFCK	IKTLFPLIEAK,KKDQVTAQEIFQDNHEDGPTAK,YAYDKR,HIEIFTDLSSR,KDEKTDTLEDLFPTTK,VITMFVQR,TLFPLIEAK,ETVYCLNDDDETEVLKEDIIQGFR,EDIQKETVYCLNDDDETEVLKEDIIQGFR,YGSDIVPFSKVDEEQMK,YAPTEAQLNAVDALIDSMSLAK,TWTVVDAK,CFSVLGFCK
P27797	CALR	Calreticulin precursor	158	241	0.3	0.59	0.7302	0.9307	4	7	4	6	16	21.5	IDNSQVESGSLEDDWDFLPPKK,EQFLDGDGWTSR,FYGDEEKDKGLQTSQDAR,IKDPDASKPEDWDER	IDNSQVESGSLEDDWDFLPPKK,FYGDEEKDK,CKDDEFTHLYTLIVRPDNTYEVK,EQFLDGDGWTSR,FYGDEEKDKGLQTSQDAR,IKDPDASKPEDWDER
P22695	UQCRC2	cytochrome b-c1 complex subunit 2, mitochondrial precursor	244	326	0.48	0.58	1.0691	1.3357	6	7	6	7	16.9	18.7	MALIGLGVSHPVLK,GGLGLSGAK,WEVADLQPQLK,YEDFSNLGTTHLLR,NALANPLYCPDYR,TIAQGNLSNTDVQAAK	GGLGLSGAK,MALIGLGVSHPVLK,YEDFSNLGTTHLLR,NALANPLYCPDYR,TIAQGNLSNTDVQAAK,ENMAYTVECLR,LTSSLTTK
P84085	ARF5	ADP-ribosylation factor 5	82	120	0.35	0.57	0.4678	0.4678	2	3	2	2	11.6	11.6	ILMVGLDAAGK,VQESADELQK	ILMVGLDAAGK,VQESADELQK
Q01518-2	CAP1	PREDICTED: adenylyl cyclase-associated protein 1 isoform X2	160	286	0.28	0.57	0.3895	0.77831	5	12	5	11	9.4	26.3	ISKEIGGDVQK,KEPAVLELEGK,NSLDCEIVSAK,LEAVSHTSDMHR,EIGGDVQK	LSDLLAPISEQIK,KEPAVLELEGK,EMNDAAMFYTNR,ALLVTASQCQQPAENK,LEAVSHTSDMHR,NSLDCEIVSAK,VENQENVSNLVIEDTELK,CVNTTLQIK,EIGGDVQK,VPTISINK,QVAYIYK
P18085	ARF4	ADP-ribosylation factor 4	55	93	0.16	0.57	0.4678	0.4678	2	3	2	2	11.6	11.6	ILMVGLDAAGK,IQEVADELQK	ILMVGLDAAGK,IQEVADELQK
P48444	ARCN1	Coatomer subunit delta isoform 1	240	382	0.48	0.56	0.55707	0.85879	7	8	6	8	13.5	17.6	NSNILEDLETLR,FSTETTFLVDKYEIL,VTQVDGNSPVR,IEGLLAAFPK,ISDDKYGR,NTLEWCLPVIDAK	NSNILEDLETLR,FSTETTFLVDKYEIL,ENVNLAQIR,SFPVNSDVGVLK,IEGLLAAFPK,VTQVDGNSPVR,ISDDKYGR,NTLEWCLPVIDAK
Q9Y265	RUVBL1	RuvB-like 1	216	384	0.29	0.56	1.1544	1.6827	7	9	7	9	22.1	27.8	EACGVIVELIK,QAASGLVGQENAR,AQTEGINISEEALNHLGEIGTK,ILADQQDK,GTEDITSPHGIPLDLLDR,VEAGDVIYIEANSGAVKR,LDPSIFESLQK	QAASGLVGQENAR,EACGVIVELIK,AQTEGINISEEALNHLGEIGTK,ALESSIAPIVIFASNR,ILADQQDK,TALALAIAQELGSK,GTEDITSPHGIPLDLLDR,YSVQLLTPANLLAK,LDPSIFESLQK
Q9Y2Q9	MRPS28	28S ribosomal protein S28, mitochondrial	33	169	0.16	0.56	0.17877	0.63789	1	3	1	3	5.3	15.5	AGGFASALER	AGGFASALER,NVESFASMLR,LLDLELTSR
P62906	RPL10A	60S ribosomal protein L10A	89	147.5	0.46	0.555	0.70125	1.0309	3	4	3	4	17	20.7	ILGPGLNK,KYDAFLASESLIK,FSVCVLGDQQHCDEAK	ILGPGLNK,DTLYEAVR,KYDAFLASESLIK,FSVCVLGDQQHCDEAK
P08195-2	SLC3A2	4F2 cell-surface antigen heavy chain isoform f	320	454	0.39	0.55	0.61026	1.0434	6	8	6	8	15.3	21.1	ADLLLSTQPGREEGSPLELER,LKLEPHEGLLLR,IGDLQAFQGHGAGNLAGLK,IKVAEDEAEAAAAAK,VAEDEAEAAAAAK,GQSEDPGSLLSLFR	NQKDDVAQTDLLQIDPNFGSKEDFDSLLQSAK,ADLLLSTQPGREEGSPLELER,LKLEPHEGLLLR,IKVAEDEAEAAAAAK,VAEDEAEAAAAAK,LDYLSSLK,VILDLTPNYR,GQSEDPGSLLSLFR
P21291	CSRP1	cysteine and glycine-rich protein 1 isoform 1	98	200	0.34	0.55	0.51991	1.3101	2	4	2	4	12.9	26.4	GFGFGQGAGALVHSE,CSQAVYAAEK	GFGFGQGAGALVHSE,GLESTTLADKDGEIYCK,IGGSERCPR,CSQAVYAAEK
P17655	CAPN2	Calpain-2 catalytic subunit	368	622	0.27	0.55	0.53993	1.2067	7	14	7	13	17.8	27	GHAYSVTGAEEVESNGSLQK,LEICNLTPDTLTSDTYKK,NFFLTNR,RPTEICADPQFIIGGATR,SDTFINLR,KADYQAVDDEIEANLEEFDISEDDIDDGFRR,GSLLGCSIDITSAADSEAITFQK	WNDNCPSWNTIDPEERER,IYREIDVDR,GHAYSVTGAEEVESNGSLQK,NFFLTNR,GSLLGCSIDITSAADSEAITFQK,ERSDTFINLR,SGTMNSYEMR,LEICNLTPDTLTSDTYKK,IRNPWGEVEWTGR,RPTEICADPQFIIGGATR,MPCQLHQVIVAR,SDTFINLR,KADYQAVDDEIEANLEEFDISEDDIDDGFRR
Q92841-1	DDX17	DEAD (Asp-Glu-Ala-Asp) box polypeptide 17, isoform CRA_f	191.5	494	0.195	0.55	0.37816	1.2122	6	10	6	10	10.9	16.7	VLEEANQAINPK,LIDFLESGK,GVEICIATPGR,SSQSSSQQFSGIGR,APILIATDVASR,GTAYTFFTPGNLK	QLAEDFLR,DMVGIAQTGSGK,VLEEANQAINPK,LIDFLESGK,GVEICIATPGR,APILIATDVASR,SSQSSSQQFSGIGR,STCIYGGAPK,GDGPICLVLAPTR,GLDVEDVK
P05198	EIF2S1	Eukaryotic translation initiation factor 2 subunit 1	150	230	0.19	0.55	0.36887	0.51991	3	5	3	4	10.1	16.8	YVMTTTTLER,VVTDTDETELAR,GVFNVQMEPK	LERENAEVDGDDDAEEMEAKAED,VVTDTDETELAR,GVFNVQMEPK,RLTPQAVK
P0C0S8	HIST1H2AG,HIST1H2AI,HIST1H2AK,HIST1H2AM,HIST1H2AL	histone H2A type 1	86	111	0.54	0.54	0.4678	2.1623	2	3	2	3	9.2	20.7	AGLQFPVGR,SSRAGLQFPVGR	HLQLAIR,AGLQFPVGR,NDEELNKLLGK
O75390	CS	citrate synthase, mitochondrial precursor	238	291	0.36	0.54	1.4484	1.7826	7	9	7	9	17.8	19.5	IVPNVLLEQGK,AYAQGISR,SMSTEGLMK,TKYWELIYEDSMDLIAK,VVPGYGHAVLR,GFSIPECQK,GLVYETSVLDPDEGIRFR	EVGKDVSDEKLR,AYAQGISR,IVPNVLLEQGK,HLPNDPMFK,LVAQLYK,SMSTEGLMK,TKYWELIYEDSMDLIAK,GFSIPECQK,DILADLIPK
P31146	CORO1A	Coronin-1A	204	334	0.36	0.54	0.58489	0.99526	5	8	5	8	12.5	16	LQATVQELQK,RGLEVNKCEIAR,DGGLICTSCR,DAGPLLISLK,AAPEASGTPSSDAVSR	ADQCYEDVR,LQATVQELQK,RGLEVNKCEIAR,KLQATVQELQK,LEETVQAK,ILTTGFSR,DAGPLLISLK,AAPEASGTPSSDAVSR
Q15233-2	NONO	non-POU domain-containing octamer-binding protein isoform 2	116	290	0.34	0.54	0.58489	1.8184	4	9	4	8	14.9	26.1	RMEELHNQEVQK,FGQAATMEGIGAIGGTPPAFNR,FACHSASLTVR,GIVEFSGKPAAR	FAQPGSFEYEYAMR,MGQMAMGGAMGINNR,RMEELHNQEVQK,FACHSASLTVR,TLAEIAKVELDNMPLR,AVVIVDDR,GIVEFSGKPAAR,AAPGAEFAPNKR
Q9Y3A5	SBDS	Ribosome maturation protein SBDS	74	200	0.24	0.54	0.4678	0.89574	2	5	2	5	10.8	21.6	LTNVAVVR,GSLEVLNLKDVEEGDEKFE	GEVQVSDKER,LTNVAVVR,KEDLISAFGTDDQTEICK,QQALEVIK,FILPVNEGKK
P84095	RHOG	Rho-related GTP-binding protein RhoG precursor	63	133	0.15	0.54	0.51991	0.87382	2	3	2	3	15.7	25.6	LKEQGQAPITPQQGQALAK,CVVVGDGAVGK	TVNLNLWDTAGQEEYDRLR,LKEQGQAPITPQQGQALAK,CVVVGDGAVGK
P42126-2	ECI1	enoyl-CoA delta isomerase 1, mitochondrial isoform 2 precursor	117	167.5	0.36	0.535	0.4678	0.68298	3	6	2	5	8	17.1	SLQMYLER,VLVEPDAGAGVAVMK	AVQELWLR,SLQMYLER,DADVQNFVSFISKDSIQK,DADVQNFVSFISK,VLVEPDAGAGVAVMK
P62899	RPL31	60S ribosomal protein L31 isoform 1	91	102	0.53	0.53	0.9307	1.6827	2	3	2	3	15.2	24.8	NLQTVNVDEN,SAINEVVTR	SAINEVVTR,NLQTVNVDEN,FAMKEMGTPDVR
P41250	GARS	Glycine--tRNA ligase precursor	248	514	0.21	0.53	0.55052	0.7302	8	13	8	13	13.1	18.2	TVNVVQFEPSKGAIGK,TSYGWIEIVGCADR,VDDSSGSIGR,ATKVPLVAEKPLKEPK,VGISPDKLR,IYLYLTK,YPLFEGQETGKKETIEE,ELSEALTR	TVNVVQFEPSKGAIGK,TVNVVQFEPSK,YPLFEGQETGKK,TSYGWIEIVGCADR,VDDSSGSIGR,SCYDLSCHAR,ATKVPLVAEKPLKEPK,ELALQPK,IYLYLTK,ELALQPKDDIVDR,ELSEALTR,YPLFEGQETGKKETIEE,QHFIQEEQILEIDCTMLTPEPVLK
P12081-2	HARS	histidine--tRNA ligase, cytoplasmic isoform 2	161	383	0.27	0.52	0.35936	0.99526	4	9	4	9	8.5	21.1	IFSIVEQR,YDLTVPFAR,YDGLVGMFDPK,ASAELIEEEVAK	LEALEEK,IFSIVEQR,AALEELVK,ILDGMFAICGVSDSK,DQGGELLSLR,IGDYVQQHGGVSLVEQLLQDPK,YDGLVGMFDPK,ASAELIEEEVAK,LIYDLK
P55060-3	CSE1L	PREDICTED: exportin-2 isoform X1	349	541	0.27	0.52	0.50131	0.88152	9	15	9	15	11.2	15.7	RAACDLVR,TGNIPALVR,AACDLVR,DLEGSDIDTR,EHDPVGQMVNNPK,AADEEAFEDNSEEYIRR,IVEDEPNKICEADRVAIK,NLFEDQNTLTSICEK,ANIVHLMLSSPEQIQK	RAACDLVR,AACDLVR,SANVNEFPVLK,MFGMVLEK,DLEGSDIDTR,AADEEAFEDNSEEYIRR,IVEDEPNKICEADRVAIK,TLDPDPAIR,LLTECPPMMDTEYTK,TGNIPALVR,NPSVNWK,EHDPVGQMVNNPK,IIIPEIQK,IVEDEPNKICEADR,ANIVHLMLSSPEQIQK
P30043	BLVRB	flavin reductase (NADPH)	70	94	0.15	0.52	0.6681	0.6681	2	2	2	2	14	14	CLTTDEYDGHSTYPSHQYQ,LQAVTDDHIR	CLTTDEYDGHSTYPSHQYQ,LQAVTDDHIR
P45974-2	USP5	ubiquitin carboxyl-terminal hydrolase 5 isoform 2	341	581	0.36	0.51	0.6788	1.2387	10	15	10	15	14.2	20.8	FLVEEK,FTFGLDWVPK,VTSAVEALLSADSASR,DGLGGLPDIVR,IFQNAPTDPTQDFSTQVAK,KQEVQAWDGEVR,SSENPNEVFR,KLDVSIEMPEELDISQLR,SAADSISESVPVGPK,DRVTSAVEALLSADSASR	QLDNPAR,FLVEEK,FTFGLDWVPK,KQEVQAWDGEVR,EVQDGIAPR,SAADSISESVPVGPK,DRVTSAVEALLSADSASR,VTSAVEALLSADSASR,DGLGGLPDIVR,RPKEEDPATGTGDPPR,IFQNAPTDPTQDFSTQVAK,TDKTMTELEIDMNQR,SSENPNEVFR,KLDVSIEMPEELDISQLR,WVIYNDQK
P61026	RAB10	ras-related protein rab-10	77	129	0.32	0.51	0.35936	0.58489	2	3	2	3	9	12.5	LQIWDTAGQER,ANINIEK	LQIWDTAGQER,FFETSAK,ANINIEK
P17858	PFKL	ATP-dependent 6-phosphofructokinase, liver type isoform b	253	376	0.21	0.51	0.50131	0.83953	6	11	6	9	9.8	15.2	IMEVIDAITTTAQSHQR,GGTPSAFDR,VFANAPDSACVIGLK,TFVLEVMGR,AIGVLTSGGDAQGMNAAVR,EQWWLSLR	GGTPSAFDR,VFLIYEGYEGLVEGGENIK,GQVQEVGWHDVAGWLGR,GQLESIVENIR,VFANAPDSACVIGLK,GGSFENNWNIYK,AIGVLTSGGDAQGMNAAVR,EQWWLSLR,TFVLEVMGR
P49327	FASN	Fatty acid synthase	745	1232.8	0.25	0.5075	0.4408	0.73542	46	81	42	67	18.7	31.6	SEGVVAVLLTKK,VVVQVLAEEPEAVLK,AFEVSENGNLVVSGK,AAEQYTPK,VVVQVLAEEPEAVLKGAKPK,AGLYGLPR,AALQEELQLCK,ASGRTPEAVQK,SLYQSAGVAPESFEYIEAHGTGTK,RPTPQDSPIFLPVDDTSFR,QEPLLIGSTK,GLKPSCTIIPLMK,EDGLAQQQTQLNLR,SEGVVAVLLTK,LGMLSPEGTCK,VGDPQELNGITR,QAHTMDPQLR,GMGLSLMR,HGLYLPTR,ALCATRQEPLLIGSTK,LSIPTYGLQCTR,LLEQGLR,DGAWGAFR,AQVADVVVSR,SNMGHPEPASGLAALAK,SDEAVKPFGLK,VLEALLPLKGLEER,VMGLVPAK,LYTLQDKAQVADVVVSR,LFDHPESPTP…	FCFTPHTEEGCLSER,GTPLISPLIK,VLEALLPLK,SEGVVAVLLTKK,FPQLDSTSFANSR,VVVQVLAEEPEAVLKGAKPK,LQVVDQPLPVR,SLYQSAGVAPESFEYIEAHGTGTK,RPTPQDSPIFLPVDDTSFR,RQQEQQVPILEK,GLKPSCTIIPLMK,SFYGSTLFLCR,LYTLQDK,GMGLSLMR,ACLDTAVENMPSLK,LSIPTYGLQCTR,AQVADVVVSR,LLEQGLR,DGAWGAFR,TGGAYGEDLGADYNLSQVCDGK,LYTLQDKAQVADVVVSR,WVCSSLR,AFDTAGNGYCR,WVESLK,GNAGQSNYGFANSAMER,CPPGVVPACHNSK,YSGTLNLDR,HFLLEEDKPEEPTAHAFVSTLTR,QQEQQVPILEK…
O43617-2	TRAPPC3	trafficking protein particle complex subunit 3 isoform 3	42	106	0.23	0.5	0.3895	2.7276	1	3	1	3	5.9	25.3	LIEDFLAR	RIEDNLPAGEE,FVQDTLKGDGVTEIR,LIEDFLAR
P05455	SSB	Lupus La protein	91	139	0.07	0.5	0.29155	0.53174	2	5	2	4	6.8	12	IIEDQQESLNK,YKETDLLILFKDDYFAK	IIEDQQESLNK,GSIFVVFDSIESAKK,YKETDLLILFKDDYFAK,WIDFVR
P11940-2	PABPC1	Isoform 2 of Polyadenylate-binding protein 1	210	328.5	0.325	0.495	0.53287	0.79673	10	13	9	12	19.1	25.9	YQGVNLYVK,ALDTMNFDVIK,QAHLTNQYMQR,SLGYAYVNFQQPADAER,EFSPFGTITSAK,SGVGNIFIK,FGPALSVK,SKVDEAVAVLQAHQAK,NLDDGIDDERLR	GFGFVSFER,ALDTMNFDVIK,YQGVNLYVK,QAHLTNQYMQR,SLGYAYVNFQQPADAER,FSPAGPILSIR,EFSPFGTITSAK,FGPALSVK,SGVGNIFIK,SKVDEAVAVLQAHQAK,SKGFGFVCFSSPEEATK,NLDDGIDDERLR
P69905	HBA2,HBA1	Hemoglobin subunit alpha	52.667	84	0.22	0.49	0.69668	1.1544	3	2	3	2	23.2	16.9	VGAHAGEYGAEALER,MFLSFPTTK,TNVKAAWGK	VGAHAGEYGAEALER,MFLSFPTTK
Q08257-3	CRYZ	quinone oxidoreductase isoform b	67	154	0.22	0.49	0.35936	0.84785	2	4	2	4	7.7	16.6	ILGTAGTEEGQK,VFEFGGPEVLK	ILGTAGTEEGQK,VFEFGGPEVLK,VAEAHENIIHGSGATGK,SDIAVPIPK
P13798	APEH	Acylamino-acid-releasing enzyme	246	475	0.26	0.48	0.61026	1.8072	6	13	6	12	8.8	21	AESFFQTK,TPLLLMLGQEDR,SALYYVDLIGGK,VTSVVVDVVPR,ALDVSASDDEIAR,TVHTEWTQR	AESFFQTK,LSPDQCR,QYLVFHDGDSVVFAGPAGNSVETR,TPLLLMLGQEDR,SALYYVDLIGGK,SFNLSALEK,VTSVVVDVVPR,ALDVSASDDEIAR,TVHTEWTQR,VVFDSAQR,AGGTGPGEEKQFLEVWEK,GSTGFGQDSILSLPGNVGHQDVK
P14868	DARS	aspartate--tRNA ligase, cytoplasmic isoform 1	162	348	0.18	0.48	0.26638	0.60372	4	8	4	8	8.7	18.7	QCFLVLR,TSTSQAVFR,IYVISLAEPR,EAGVEMGDEDDLSTPNEK	VFSIGPVFR,FGAPPHAGGGIGLER,YGISSMIQSQEKPDR,LEYCEALAMLR,IGSCTQQDVELHVQK,TSTSQAVFR,IYVISLAEPR,IHDPQLLTER
Q9P258	RCC2	Protein RCC2	35	332	0.06	0.48	0.082637	0.88739	1	9	1	9	3.2	19.9	AGGAAVVITEPEHTKER	AVQDLCGWR,VFSWGFGGYGR,YGCLAGVR,AAAAAWEEPSSGNGTAR,AGGAAVVITEPEHTKER,IEYDCELVPR,TKDGQILPVPNVVVR,AGGAAVVITEPEHTK,LIEGLSHEVIVSAACGR
P07384	CAPN1	Calpain-1 catalytic subunit	54	508	0.04	0.48	0.13646	0.89574	2	11	2	11	3.2	14.9	YLGQDYEQLR,NYPATFWVNPQFK	YLGQDYEQLR,GQVVSLIR,APSDLYQIILK,LEICNLTPDALK,SGSMSAYEMR,QLAGEDMEISVK,NYPATFWVNPQFK,DFFLANASR,LYELIITR,GHAYSVTGAK,EFTRLEICNLTPDALK
Q15366-2	PCBP2	poly(rC)-binding protein 2 isoform a	195.5	203.67	0.33	0.47667	0.84785	0.86239	4	8	4	6	15.3	21.8	LVVPASQCGSLIGK,ESTGAQVQVAGDMLPNSTER,LSSETGGMGSS,INISEGNCPER	IITLAGPTNAIFK,IANPVEGSTDR,LVVPASQCGSLIGK,ESTGAQVQVAGDMLPNSTER,LSSETGGMGSS,INISEGNCPER
P52292	KPNA2	Importin subunit alpha-1	244	419	0.39	0.47	0.9307	1.4041	6	8	6	8	14.9	19.8	LLGASELPIVTPALR,EATWTMSNITAGR,NVSSFPDDATSPLQENR,TGVVPQLVK,FVSFLGR,GINSSNVENQLQATQAAR	NNQGTVNWSVDDIVK,LLGASELPIVTPALR,EATWTMSNITAGR,NLTWTLSNLCR,NVSSFPDDATSPLQENR,TGVVPQLVK,FVSFLGR,GINSSNVENQLQATQAAR
Q9UGT4	SUSD2	sushi domain-containing protein 2 precursor	272	468	0.23	0.47	0.55707	1.0309	6	11	6	9	12.7	22.8	IPFTVSLDNGHSFPR,GTGLTAVAVQEGNSDVVEVR,MSSPTDASVICR,HDPTFEPLFPSETTLNPSLAQEAAK,SVQASLR,FFTDYGCDMEQGSVCTYHPGAVHCVR	DVQALWTNDHALAWHLSDDFREDPVAWAR,IPFTVSLDNGHSFPR,FKDSIQTLGHVDSSGQVHCVSPLLYESGR,LCGDDHFCNFDVAATGSLSTGTATR,GTGLTAVAVQEGNSDVVEVR,MSSPTDASVICR,HDPTFEPLFPSETTLNPSLAQEAAK,SVQASLR,FFTDYGCDMEQGSVCTYHPGAVHCVR
P29692-2	EEF1D	PREDICTED: elongation factor 1-delta isoform X4	380	342.5	0.31	0.46	0.41747	0.47304	7	15	7	11	12.9	21	QENGASVILRDIAR,LRQYAEK,QENGASVILR,SIQLDGLVWGASK,SLAGSSGPGASSGTSGDHGELVVR,FYEQMNGPVAGASR,IASLEVENQSLR	SSILLDVKPWDDETDMAQLEACVR,QENGASVILRDIAR,RFYEQMNGPVAGASR,QENGASVILR,SIQLDGLVWGASK,SLAGSSGPGASSGTSGDHGELVVR,ATAPQTQHVSPMR,FYEQMNGPVAGASR,GVVQELQQAISK,IASLEVENQSLR,LVPVGYGIR
P07954-2	FH	Isoform Cytoplasmic of Fumarate hydratase, mitochondrial	282	390	0.29	0.46	0.77828	1.1544	6	8	6	8	19.2	24.1	THTQDAVPLTLGQEFSGYVQQVK,MPTPVIK,IYELAAGGTAVGTGLNTR,IANAIMK,AAAEVNQDYGLDPK,SGLGELILPENEPGSSIMPGK	THTQDAVPLTLGQEFSGYVQQVK,MPTPVIK,IYELAAGGTAVGTGLNTR,IANAIMK,AIEMLGGELGSK,IPVHPNDHVNK,AAAEVNQDYGLDPK,SGLGELILPENEPGSSIMPGK
Q13838-2	DDX39B	BAT1 protein	152	212	0.21	0.46	0.40653	0.6681	4	7	4	6	9.9	14.8	VNIAFNYDMPEDSDTYLHR,DVQEIFR,ELAFQISK,ILVATNLFGR	NCPHIVVGTPGR,VNIAFNYDMPEDSDTYLHR,DFLLKPELLR,DVQEIFR,ELAFQISK,ILVATNLFGR
Q9UL25	RAB21	Ras-related protein Rab-21	92	139	0.14	0.46	0.4251	0.4251	2	3	2	2	12	12	MIETAQVDER,HVSIQEAESYAESVGAK	MIETAQVDER,HVSIQEAESYAESVGAK
P53004	BLVRA	biliverdin reductase A precursor	78	193	0.1	0.46	0.15478	0.77828	1	4	1	4	3.3	15.5	FGVVVVGVGR	SPLSWIEEK,ILHCLGLAEEIQK,FGVVVVGVGR,SGSLENVPNVGVNK
P04259	KRT6B	keratin, type II cytoskeletal 6B	450	281	0.7	0.45	0.81161	0.53061	11	14	10	13	13.4	17	YEDEINKR,NLDLDSIIAEVK,FASFIDK,EYQELMNVK,NKYEDEINKR,FASFIDKVR,NMQDLVEDLKNK,FLEQQNK,YEELQITAGR,AQYEEIAQR	YEDEINKR,NLDLDSIIAEVK,FASFIDK,EYQELMNVK,AEAESWYQTK,NKYEDEINKR,FASFIDKVR,NMQDLVEDLKNK,SGFSSISVSR,FLEQQNK,NKYEDEINK,YEELQITAGR,AQYEEIAQR
P28072	PSMB6	proteasome subunit beta type-6 isoform 1 proprotein	156	161	0.45	0.45	0.77828	0.77828	3	3	3	3	12.9	12.9	TTTGSYIANR,LAAIAESGVER,QVLLGDQIPK	TTTGSYIANR,LAAIAESGVER,QVLLGDQIPK
Q8NBJ7	SUMF2	Sulfatase-modifying factor 2	138	209	0.45	0.45	0.77828	0.77828	4	4	4	4	15.9	15.9	CAADAGRPPGEL,QPAGPGSGIR,MGNTPDSASDNLGFR,FLMGTNSPDSR	CAADAGRPPGEL,QPAGPGSGIR,FLMGTNSPDSR,MGNTPDSASDNLGFR
P02768	ALB	serum albumin preproprotein	339	363.5	0.44	0.45	0.62486	0.61642	16	12	13	11	19.7	16.4	CCTESLVNR,LVNEVTEFAK,ETYGEMADCCAK,KVPQVSTPTLVEVSR,VPQVSTPTLVEVSR,AACLLPK,LCTVATLR,CASLQKFGER,LKECCEKPLLEK,LVAASQAALGL,LVTDLTK,YLYEIAR,YICENQDSISSK	CCTESLVNR,ETYGEMADCCAK,VPQVSTPTLVEVSR,KVPQVSTPTLVEVSR,LCTVATLR,LVAASQAALGL,LVNEVTEFAK,QTALVELVK,LVTDLTK,YLYEIAR,YICENQDSISSK
P41091	EIF2S3	eukaryotic translation initiation factor 2 subunit 3	220	235	0.36	0.45	0.7302	0.9307	5	6	5	6	12	14.6	IVLTNPVCTEVGEK,GVTIKPTVDDD,LIGWGQIR,VGQEIEVRPGIVSK,QDLTTLDVTK	IVLTNPVCTEVGEK,GVTIKPTVDDD,LIGWGQIR,VGQEIEVRPGIVSK,YNIEVVCEYIVK,QDLTTLDVTK
Q99798	ACO2	aconitate hydratase, mitochondrial precursor	259	539	0.21	0.45	0.4678	1.0209	6	11	6	11	9.6	19.6	IVYGHLDDPASQEIER,VAGILTVK,WVVIGDENYGEGSSR,SQFTITPGSEQIR,DGYAQILR,NAVTQEFGPVPDTAR	VGLIGSCTNSSYEDMGR,IVYGHLDDPASQEIER,LNRPLTLSEK,WVVIGDENYGEGSSR,SQFTITPGSEQIR,NTIVTSYNR,QGLLPLTFADPADYNK,DGYAQILR,DSSGQHVDVSPTSQR,NAVTQEFGPVPDTAR,VAMSHFEPNEYIHYDLLEK
Q15437	SEC23B	Protein transport protein Sec23B isoform 1	188	370	0.2	0.45	0.31113	0.83953	5	10	5	9	7.8	15.6	LGVFRAESEEGPDVLR,NWADVQSQLR,HLLQAPLDDAQEILQAR,AESEEGPDVLR,HIEAAFDQEAAAVLMAR	NWADVQSQLR,HLLQAPLDDAQEILQAR,AVLNPLCQVDYR,MVQVHELSCEGISK,SWHDIEKDNAR,AESEEGPDVLR,HIEAAFDQEAAAVLMAR,SPFLQVFNNSPDESSYYR,FSWNVWPSSR
P17568	NDUFB7	NADH dehydrogenase [ubiquinone] 1 beta subcomplex subunit 7	58	88	0.2	0.45	0.4678	0.4678	2	2	2	2	9.4	9.4	GQGPGEVDPK,GQGPGEVDPKVAL	GQGPGEVDPK,GQGPGEVDPKVAL
O15144	ARPC2	Actin-related protein 2/3 complex subunit 2	49	201	0.1	0.45	0.11588	0.9307	1	6	1	6	3	18	MILLEVNNR	IIEETLALK,AYIHTR,MILLEVNNR,YFQFQEEGKEGENR,VFMQEFK,NCFASVFEK
P30048-2	PRDX3	Isoform 2 of Thioredoxin-dependent peroxide reductase, mitochondrial	39	218	0.13	0.44	0.25893	2.1623	1	6	1	5	2.9	21.8	SVEETLR	EYFQKVNQ,SVEETLR,DYGVLLEGSGLALR,GLFIIDPNGVIK,HLSVNDLPVGR
Q9UBR2	CTSZ	cathepsin Z preproprotein	56	173	0.1	0.44	0.15478	0.77828	1	4	1	4	3.3	15.8	VGDYGSLSGR	IVTSTYKDGK,NVDGVNYASITR,VGDYGSLSGR,YNLAIEEHCTFGDPIV
P38919	EIF4A3	Eukaryotic initiation factor 4A-III	332	244.5	0.84	0.43	0.95734	0.58443	8	9	8	9	19.4	18.4	DVIAQSQSGTGK,ETQALILAPTR,KVDWLTEK,VLISTDVWAR,EQIYDVYR,MLVLDEADEMLNK,GIYAYGFEKPSAIQQR,GRDVIAQSQSGTGK	DVIAQSQSGTGK,ETQALILAPTR,RKVDWLTEK,ELAVQIQK,KVDWLTEK,EQIYDVYR,VLISTDVWAR,GIYAYGFEKPSAIQQR,GRDVIAQSQSGTGK
Q15084-2	PDIA6	protein disulfide-isomerase A6 isoform a	378	301	0.42	0.43	0.99526	0.81695	7	9	7	9	17	22.5	IFQKGESPVDYDGGR,TGEAIVDAALSALR,LAAVDATVNQVLASR,NRPEDYQGGR,NSYLEVLLK,TRSDIVSR,GSFSEQGINEFLR	GESPVDYDGGR,AATALKDVVK,IFQKGESPVDYDGGR,TGEAIVDAALSALR,LAAVDATVNQVLASR,NRPEDYQGGR,NSYLEVLLK,GSFSEQGINEFLR,VGAVDADKHHSLGGQYGVQGFPTIK
P05026-2	ATP1B1	Na,K-ATPase beta subunit	134	137	0.31	0.43	0.58489	0.58489	3	3	3	3	12.6	12.6	VAPPGLTQIPQIQK,YNPNVLPVQCTGK,SYEAYVLNIVR	VAPPGLTQIPQIQK,YNPNVLPVQCTGK,SYEAYVLNIVR
Q99714-2	HSD17B10	3-hydroxyacyl-CoA dehydrogenase type-2 isoform 2	46	132	0.13	0.43	0.21153	0.77828	1	3	1	3	4.7	20.6	GGIVGMTLPIAR	LVGQGASAVLLDLPNSGGEAQAK,GGIVGMTLPIAR,LVAGEMGQNEPDQGGQR
Q9NR45	NANS	sialic acid synthase	96.5	176	0.17	0.425	0.34735	0.77828	3	5	3	4	13.6	19.7	VKIPEGTILTMDMLTVK,VGSGDTNNFPYLEK,GSDHSASLEPGELAELVR	VKIPEGTILTMDMLTVK,VLVTVEEDDTIMEELVDNHGKK,VGSGDTNNFPYLEK,GSDHSASLEPGELAELVR
Q14103-2	HNRNPD	heterogeneous nuclear ribonucleoprotein D0 isoform b	164	159	0.42	0.42	1.4245	1.0309	4	4	4	4	17.8	11.6	IREYFGGFGEVESIELPMDNK,FGEVVDCTLKLDPITGR,GFGFVLFK,IFVGGLSPDTPEEK	FGEVVDCTLKLDPITGR,FGEVVDCTLK,GFGFVLFK,IFVGGLSPDTPEEK
Q92945	KHSRP	Far upstream element-binding protein 2	248	427	0.19	0.42	0.41747	0.87382	5	11	5	10	9	14.6	AINQQTGAFVEISR,IGGGIDVPVPR,IQNDAGVR,MILIQDGSQNTNVDKPLR,IQFKQDDGTGPEK	AINQQTGAFVEISR,KIQNDAGVR,QLIEEK,MMLDDIVSR,VQISPDSGGLPER,IGGGIDVPVPR,IQNDAGVR,MILIQDGSQNTNVDKPLR,IQFKQDDGTGPEK,QLEDGDQPESK
Q16891-2	IMMT	MICOS complex subunit MIC60 isoform 3	202	387	0.12	0.42	0.25893	0.65959	6	11	6	11	7.3	17.1	YSTSGSSGLTTGK,RAFDSAVAK,SLEDALR,AFDSAVAK,GVYSEETLR,LAQQEKQEQVKIESLAK	YSTSGSSGLTTGK,RAFDSAVAK,VVSQYHELVVQAR,AFDSAVAK,RIDQLNR,GVYSEETLR,VQEQELKSEFEQNLSEK,ELDSITPEVLPGWK,LAQQEKQEQVKIESLAK,ERPPEEVAAR,LSQEQVDNFTLDINTAYAR
O00159-2	MYO1C	unconventional myosin-Ic isoform c	143	568	0.08	0.42	0.16298	0.57297	4	13	4	13	4.5	15.2	LGTDEISPR,LLQFYAETCPAPER,LLQSNPVLEAFGNAK,YLGLLENLR	CPENAFFLDHVR,NFHIFYQLLEGGEEETLR,QLLLTPNAVVIVEDAKVK,LLQFYAETCPAPER,TFTWLVGK,LLQSNPVLEAFGNAK,YLGLLENLR,LGTDEISPR,DGTIDFTPGSELLITK,GEELLSPLNLEQAAYAR,TSFLLNLR,TLFATEDALEVR,NFHIFYQLLEGGEEETLRR
Q08380	LGALS3BP	Galectin-3-binding protein precursor	339	282	0.435	0.4125	0.77828	0.84358	8	16	8	16	14.8	33.1	KSQLVYQSR,LADGGATNQGR,LASAYGAR,AVDTWSWGER,SDLAVPSELALLK,ASHEEVEGLVEK,ELSEALGQIFDSQR,RIDITLSSVK	TIAYENK,LADGGATNQGR,STHTLDLSR,LASAYGAR,AVDTWSWGER,GQWGTVCDNLWDLTDASVVCR,ASHEEVEGLVEK,ELSEALGQIFDSQR,TLQALEFHTVPFQLLAR,RIDITLSSVK,KSQLVYQSR,AAFGQGSGPIMLDEVQCTGTEASLADCK,SDLAVPSELALLK,YSSDYFQAPSDYR,SGGSDRTIAYENK,VEIFYR
P17174	GOT1	Aspartate aminotransferase, cytoplasmic	196	232	0.32	0.41	0.70125	0.55707	6	5	6	5	22.2	17.1	IVASTLSNPELFEEWTGNVK,TDDCHPWVLPVVK,NLDYVATSIHEAVTK,VGGVQSLGGTGALR,APPSVFAEVPQAQPVLVFK,LALGDDSPALK	VNLGVGAYR,IVASTLSNPELFEEWTGNVK,IGADFLAR,NLDYVATSIHEAVTK,APPSVFAEVPQAQPVLVFK
P62979	RPS27A	ubiquitin-40S ribosomal protein S27a precursor	75.333	105.25	0.25333	0.41	0.82772	1.1243	4	5	4	5	23.7	29.4	MQIFVK,TITLEVEPSDTIENVKAK,TITLEVEPSDTIENVK,IQDKEGIPPDQQR	MQIFVK,TITLEVEPSDTIENVKAK,TLSDYNIQK,TITLEVEPSDTIENVK,IQDKEGIPPDQQR
P51665	PSMD7	26S proteasome non-ATPase regulatory subunit 7	119	154	0.19	0.41	0.63789	0.63789	3	3	3	3	18.8	18.8	DLGLPTEAYISVEEVHDDGTPTSK,TFEHVTSEIGAEEAEEVGVEHLLR,DIKDTTVGTLSQR	DLGLPTEAYISVEEVHDDGTPTSK,TFEHVTSEIGAEEAEEVGVEHLLR,DIKDTTVGTLSQR
P52789	HK2	Hexokinase-2	236	413	0.17	0.41	0.34171	0.55414	7	12	6	10	8	11.9	STPDGTEHGEFLALDLGGTNFR,MISGMYLGEIVR,LSDETLLEISK,GAAMVTAVAYR,MLPTFVR,STIGVDGSVYK	STPDGTEHGEFLALDLGGTNFR,SEDGSGKGAAMVTAVAYR,MISGMYLGEIVR,NILIDFTK,GLGATTHPTAAVK,ICQIVSTR,MLPTFVR,GAAMVTAVAYR,STIGVDGSVYK,NVELVEGEEGR
O14745	SLC9A3R1	Na(+)/H(+) exchange regulatory cofactor NHE-RF1	335	224	0.5	0.405	0.90546	0.64578	6	7	6	7	26.5	28.7	LVEPGSPAEK,EALAEAALESPRPALVR,SVDPDSPAEASGLR,LLVVDPETDEQLQK,LLVVDRETDEFFKK,AQEAPGQAEPPAAAEVQGAGNENEPR	EALAEAALESPRPALVR,LVEPGSPAEK,SVDPDSPAEASGLR,LLVVDPETDEQLQK,LLVVDRETDEFFKK,AGLLAGDR,AQEAPGQAEPPAAAEVQGAGNENEPR
P02774-3	GC	Isoform 3 of Vitamin D-binding protein	391	291	0.57	0.4	0.44544	0.44544	10	6	9	6	13.9	12.9	LCMAALK,DYEKNKVCK,GQELCADYSENTFTEYKK,HQPQEFPTYVEPTNDEICEAFRKDPK,LCDNLSTK,HQPQEFPTYVEPTNDEICEAFRK,KLCMAALK,GQELCADYSENTFTEYK,HQPQEFPTYVEPTNDEICEAFR	LCMAALK,DYEKNKVCK,LCDNLSTK,KLCMAALK,GQELCADYSENTFTEYK,HQPQEFPTYVEPTNDEICEAFR
O00231-2	PSMD11	Proteasome 26S non-ATPase subunit 11 variant	147	278	0.22	0.4	0.29155	0.6681	3	6	3	6	7.5	16	LYDNLLEQNLIR,VVDSLYNK,TGQAAELGGLLK	VQIEHISSLIK,YQEALHLGSQLLR,TTANAIYCPPK,EQSILELGSLLAK,LYDNLLEQNLIR,VVDSLYNK
O60664-3	PLIN3	perilipin-3 isoform 2	72	251	0.07	0.4	0.10069	0.6156	1	5	1	5	2.7	15.2	VSGAQEMVSSAK	GLDKLEENLPILQQPTEK,VSGAQEMVSSAK,SVVTGGVQSVMGSR,LGSLSER,DTVATQLSEAVDATR
P67809	YBX1	Nuclease-sensitive element-binding protein 1	118	196	0.19	0.395	0.3895	1.0361	2	7	2	6	16.6	39.1	EDGNEEDKENQGDETQGQQPPQRR,RPQYSNPPVQGEVMEGADNQGAGEQGRPVR	GAEAANVTGPGGVPVQGSK,SVGDGETVEFDVVEGEKGAEAANVTGPGGVPVQGSK,NGYGFINR,EDGNEEDKENQGDETQGQQPPQRR,NYQQNYQNSESGEKNEGSESAPEGQAQQR,RPQYSNPPVQGEVMEGADNQGAGEQGRPVR
Q9UJS0-2	SLC25A13	calcium-binding mitochondrial carrier protein Aralar2 isoform 1	138	321.5	0.19	0.39	0.30495	0.64863	5	10	5	10	10.3	18.9	IAPLEEGTLPFNLAEAQR,ASGDSARPVLLQVAESAYR,LTVNDFVR,YLNIFGESQPNPK,LQVAGEITTGPR	IAPLEEGTLPFNLAEAQR,ILREEGPK,ASGDSARPVLLQVAESAYR,LTVNDFVR,YEGFFGLYR,YLNIFGESQPNPK,DLGFFGIYK,GLLPQLLGVAPEK,WFYIDFGGVKPMGSEPVPK,LQVAGEITTGPR
Q9Y266	NUDC	nuclear migration protein nudC	104	165	0.18	0.39	0.23285	0.51991	2	4	2	4	7.8	13.8	LKPNLGNGADLPNYR,LVSSDPEINTK	LKPNLGNGADLPNYR,SMGLPTSDEQK,LVSSDPEINTK,SETSGPQIK
Q06210-2	GFPT1	glutamine--fructose-6-phosphate aminotransferase [isomerizing] 1 isoform 2	123	399	0.13	0.39	0.16591	0.58489	3	9	3	9	6.6	16.2	ETDCGVHINAGPEIGVASTK,VIFLEDDDVAAVVDGR,GSPLLIGVR	EIFEQPESVVNTMR,ETDCGVHINAGPEIGVASTK,VIFLEDDDVAAVVDGR,GYDVDFPR,GYDFESETDTETIAK,SVHFPGQAVGTR,EILETLIK,GSPLLIGVR,GNFSSFMQK
P28074	PSMB5	proteasome subunit beta type-5 isoform 1	48	99	0.12	0.39	0.35936	0.58489	2	3	2	3	6.8	10.6	AIYQATYR,HGVIVAADSR	AIYQATYR,LLANMVYQYK,HGVIVAADSR
P39687	ANP32A	Acidic leucine-rich nuclear phosphoprotein 32 family member A	53	126	0.12	0.39	0.29155	0.29155	2	3	2	3	5.6	6.4	ELVLDNSR,TPSDVKELVLDNSR	ELVLDNSR,TPSDVKELVLDNSR,NRTPSDVKELVLDNSR
P24539	ATP5F1	ATP synthase F(0) complex subunit B1, mitochondrial precursor	32	122	0.11	0.39	0.15478	0.77828	1	4	1	4	3.1	16	LAQLEEAK	LAQLEEAK,HVVQSISTQQEKETIAK,KAQAQPVM,HYLFDVQR
O60313-2	OPA1	Dynamin-like 120 kDa protein, mitochondrial isoform 7	160	421	0.09	0.39	0.15478	0.48551	4	10	4	10	4	13.3	VIQHNALEDR,VVVVGDQSAGK,IQQIIEGK,ESVEQQADSFK	GNSSESIEAIREYEEEFFQNSK,VIQHNALEDR,QQLTNTEVR,VVVVGDQSAGK,AVEVAWETLQEEFSR,NLSLAVSDCFWK,HFVDSELECNDVVLFWR,IQQIIEGK,ESVEQQADSFK,AKNEILDEVISLSQVTPK
P62191	PSMC1	26S protease regulatory subunit 4	197	253	0.3	0.38	0.4251	0.85879	5	7	5	7	13.4	20.9	VAEEHAPSIVFIDEIDAIGTKR,GVILYGPPGTGK,VAEEHAPSIVFIDEIDAIGTK,IKDYLLMEEEFIR,AICTEAGLMALR	VAEEHAPSIVFIDEIDAIGTKR,VVGSELIQK,IETLDPALIRPGR,GVILYGPPGTGK,KQEGTPEGLYL,AVANQTSATFLR,IKDYLLMEEEFIR
Q9Y678	COPG1	Coatomer subunit gamma-1	286	416	0.22	0.38	0.3895	0.59986	7	10	7	10	9.1	14.4	ALQQYTLEPSEKPFDLK,SVPLATAPMAEQR,AGAVSALAK,ATFYLNVLEQK,ILHLLGQEGPK,TLEEAVGNIVK,SAVLQEAR	ALQQYTLEPSEKPFDLK,SVPLATAPMAEQR,SSPEPVALTESETEYVIR,VFNETPINPR,ILHLLGQEGPK,LFQSNDPTLRR,CVMDDDNEVRDR,QEIFQEQLAAVPEFR,TLEEAVGNIVK,SAVLQEAR
P39656-3	DDOST	Isoform 3 of Dolichyl-diphosphooligosaccharide--protein glycosyltransferase 48 kDa subunit	147	211	0.21	0.38	0.77828	1.0535	4	5	4	5	8.6	10.9	TLVLLDNLNVR,SSLNPILFR,GFELTFK,TADDPSLSLIK	TLVLLDNLNVR,WVFKEEGVLR,SSLNPILFR,GFELTFK,TADDPSLSLIK
Q04760-2	GLO1	Isoform 2 of Lactoylglutathione lyase	66	107	0.17	0.38	0.51991	0.87382	2	3	2	3	8.8	13	RFEELGVK,IAWALSR	RFEELGVK,SLDFYTR,IAWALSR
P55084-2	HADHB	trifunctional enzyme subunit beta, mitochondrial isoform 3	107	197	0.14	0.38	0.2452	0.55052	3	6	3	5	9.5	16.5	LVMAAANR,LAAAFAVSR,FNFLAPELPAVSEFSTSETMGHSADR	LVMAAANR,LAAAFAVSR,KAQDEGLLSDVVPFKVPGK,DQLLLGPTYATPK,FNFLAPELPAVSEFSTSETMGHSADR
P55263-2	ADK	adenosine kinase isoform a	62	168	0.08	0.38	0.12884	0.62378	1	4	1	4	3.7	12.7	SLIANLAAANCYK	TGCTFPEKPDFH,IVIFTQGR,AGHYAASIIIR,SLIANLAAANCYK
Q15691	MAPRE1	Microtubule-associated protein RP/EB family member 1	140	137.5	0.37	0.375	0.9307	0.95687	3	4	3	4	20.8	29.4	NIELICQENEGENDPVLQR,FFDANYDGKDYDPVAAR,QGQETAVAPSLVAPALNKPK	NIELICQENEGENDPVLQR,FFDANYDGKDYDPVAAR,QGQETAVAPSLVAPALNKPK,KNPGVGNGDDEAAELMQQVNVLK
P06396-2	GSN	gelsolin isoform b	359	519	0.32	0.37	1.1544	1.7826	8	11	8	11	16.4	19.4	TPSAAYLWVGTGASEAEKTGAQELLR,TASDFITK,AQPVQVAEGSEPDGFWEALGGK,HVVPNEVVVQR,AGALNSNDAFVLK,EVQGFESATFLGYFK,RTPITVVK,QTQVSVLPEGGETPLFK	TPSAAYLWVGTGASEAEKTGAQELLR,TASDFITK,AQPVQVAEGSEPDGFWEALGGK,LFACSNK,TPSAAYLWVGTGASEAEK,AGALNSNDAFVLK,AGKEPGLQIWR,EVQGFESATFLGYFK,RTPITVVK,DSQEEEKTEALTSAK,QTQVSVLPEGGETPLFK
Q6XQN6-2	NAPRT	Isoform 2 of Nicotinate phosphoribosyltransferase	168	283	0.3	0.37	0.9307	1.4041	5	7	5	7	9.8	14.9	ALAQLSLSR,LVAVGGQPR,LDSGDLLQQAQEIRK,MKLTEDPEKQTLPGSK,LLEMGLR	ALAQLSLSR,AFQGLLDTYSVWR,LVAVGGQPR,AAFVAYALAFPR,MKLTEDPEKQTLPGSK,LDSGDLLQQAQEIR,ARDAAEFELFFR
P25789	PSMA4	proteasome subunit alpha type-4 isoform 1	58	142	0.11	0.37	0.4251	0.70125	2	3	2	3	6.5	10.3	SALALAIK,TTIFSPEGR	SALALAIK,LLDEVFFSEK,TTIFSPEGR
O95573	ACSL3	long-chain-fatty-acid--CoA ligase 3	71	382	0.08	0.37	0.14976	0.74753	2	8	2	8	2.7	15.1	VGAPLVCCEIK,VSEMSSFQR	VGAPLVCCEIK,LSPEPWTPETGLVTDAFK,IGYSSPQTLADQSSK,LLLCGGAPLSATTQR,LKDIVSLVPR,VSEMSSFQR,EVLNEEDEVQPNGK,WLCTGDIGEFEPDGCLK
P61289-2	PSME3	proteasome activator complex subunit 3 isoform 2	89	128	0.23	0.36	0.43845	0.43845	3	3	3	3	14.6	14.6	SNQQLVDIIEK,RLDECEEAFQGTK,TVESEAASYLDQISR	SNQQLVDIIEK,RLDECEEAFQGTK,TVESEAASYLDQISR
P52943-2	CRIP2	cysteine-rich protein 2 isoform 2	95	149.5	0.22	0.36	0.77828	1.0748	2	4	2	4	13.4	15.9	GVNTGAVGSYIYDRDPEGKVQP,ASSVTTFTGEPNTCPR	GVNTGAVGSYIYDRDPEGKVQP,ASSVTTFTGEPNTCPR,GVNTGAVGSYIYDRDPEGK,KVYFAEK
P00390-2	GSR	Chain A, Crystal Structure Analysis Of The Human Glutahione Reductase, Complexed With Gopi	114	233	0.2	0.36	0.43845	0.83298	3	5	3	5	9.3	15.6	LNAIYQNNLTK,LGGTCVNVGCVPK,ADFDNTVAIHPTSSEELVTLR	LNAIYQNNLTK,ALLTPVAIAAGR,LGGTCVNVGCVPK,GHAAFTSDPKPTIEVSGK,ADFDNTVAIHPTSSEELVTLR
Q14697	GANAB	neutral alpha-glucosidase AB isoform 2 precursor	284	465	0.23	0.35	0.56719	1.1951	8	14	8	14	10.5	18.2	NLGLYVK,SLLLSVNAR,LKVTEGGEPYR,SGGMERPFVLAR,YRVPDVLVADPPIAR,VSQGSKDPAEGDGAQPEETPR,LSFQHDPETSVLVLR,SIRPGLSPYR	FGAVWTGDNTAEWDHLK,VVIIGAGKPAAVVLQTK,SLLLSVNAR,FRIDELEPR,LKVTEGGEPYR,TCEESSFCKR,SGGMERPFVLAR,YFTWDPSRFPQPR,YRVPDVLVADPPIAR,VSQGSKDPAEGDGAQPEETPR,LSFQHDPETSVLVLR,QEFLLR,SIRPGLSPYR,LDLLEDR
P07099	EPHX1	epoxide hydrolase 1	60	182	0.06	0.35	0.23285	0.87382	2	6	2	6	3.7	14.7	YLEDGGLER,FLSVLERQ	YLEDGGLER,GGHFAAFEEPELLAQDIR,FLGLTER,EDDSIRPFKVETSDEEIHDLHQR,FLGLTERDVELLYPVK,GGHFAAFEEPELLAQDIRK
P07910-2	HNRNPC	heterogeneous nuclear ribonucleoproteins C1/C2 isoform b	142	101.33	0.34	0.34667	0.23285	0.19652	3	4	2	3	9.2	12.2	MIAGQVLDINLAAEPK,GFAFVQYVNER	LKGDDLQAIKK,VPPPPPIAR,MIAGQVLDINLAAEPK
Q96AE4-2	FUBP1	Fubp1 protein	189	247.5	0.2	0.345	0.43301	0.60415	5	11	5	11	9.6	19.1	CQHAAEIITDLLR,IQIAPDSGGLPER,IQNDAGVR,SCMLTGTPESVQSAKR,IGGNEGIDVPIPR	KIQNDAGVR,CQHAAEIITDLLR,QLIEEK,IQIAPDSGGLPER,IQFKPDDGTTPER,IQNDAGVR,SCMLTGTPESVQSAKR,MVMIQDGPQNTGADKPLR,EMVLELIRDQGGFR,GTPQQIDYAR,IGGNEGIDVPIPR
Q9HB71-3	CACYBP	calcyclin-binding protein isoform 2	168	66	1.08	0.34	0.99526	0.58489	4	2	4	2	17.2	10.2	TINKAWVESR,TDTVLILCR,IYEDGDDDMKR,VKTDTVLILCR	TINKAWVESR,TDTVLILCR
Q02878	RPL6	60S ribosomal protein L6	101	126	0.34	0.34	0.77828	0.77828	3	3	3	3	13.1	13.1	YYPTEDVPR,AVDSQILPK,HQEGEIFDTEKEKYEITEQR	YYPTEDVPR,HQEGEIFDTEKEKYEITEQR,AVDSQILPK
Q9UI12-2	ATP6V1H	V-type proton ATPase subunit H isoform 2	181	188	0.26	0.34	0.44544	0.58489	4	5	4	5	12.9	14.4	GAVDAAVPTNIIAAK,QLQSEQPQTAAAR,VSIFFDYAR,LLEVSDDPQVLAVAAHDVGEYVR	GAVDAAVPTNIIAAK,QLQSEQPQTAAAR,VSIFFDYAR,IILAAFR,LLEVSDDPQVLAVAAHDVGEYVR
Q12905	ILF2	Interleukin enhancer-binding factor 2 isoform 1	160	185	0.25	0.34	0.58489	0.84785	3	4	3	4	12.3	15.3	ILITTVPPNLR,GTMTTGHNVADLVVILK,NQDLAPNSAEQASILSLVTK	VKPAPDETSFSEALLK,ILPTLEAVAALGNK,QPLALNVAYR,NQDLAPNSAEQASILSLVTK
O95373	IPO7	Importin-7	157	440	0.11	0.34	0.25893	0.6788	4	11	4	10	4.1	11.2	GTMDPALR,LLEVIILQCK,AIFQTIQNR,VLTGVAGEDAECHAAK	GTMDPALR,QLQDIATLADQRR,EYNEFAEVFLK,KVLTGVAGEDAECHAAK,LLEVIILQCK,AFAVGVQQVLLK,AIFQTIQNR,NPVWYQALTHGLNEEQR,VLTGVAGEDAECHAAK,FSAPVVPSSFNFGGPAPGMN
P38606-2	ATP6V1A	unnamed protein product	37	257	0.05	0.34	0.06605	0.56475	1	6	1	6	1.5	16.6	GVNVSALSR	TALVANTSNMPVAAR,LAEMPADSGYPAYLGAR,VGHSELVGEIIR,ASLAETDKITLEVAK,VGSHITGGDIYGIVSENSLIK,LIKDDFLQQNGYTPYDR
P12956	XRCC6	X-ray repair cross-complementing protein 6 isoform 1	372	308.5	0.51	0.33	0.83953	0.62126	10	9	9	9	17.7	20	YSGRDSLIFLVDASK,SQIYGSR,DSLIFLVDASK,IMATPEQVGK,SDSFENPVLQQHFR,NIYVLQELDNPGAK,IMLFTNEDNPHGNDSAK,TFNTSTGGLLLPSDTKR,QIILEKEETEELKR	SQIYGSR,IISSDRDLLAVVFYGTEK,IMATPEQVGK,DSLIFLVDASK,SDSFENPVLQQHFR,IMLFTNEDNPHGNDSAK,NIYVLQELDNPGAK,TFNTSTGGLLLPSDTKR,QIILEKEETEELKR
Q16851-2	UGP2	UTP--glucose-1-phosphate uridylyltransferase isoform b	163	189	0.26	0.33	0.3895	0.50859	4	5	4	5	10.6	12.4	GGTLTQYEGK,INKESLLPVAK,NENTFLDLTVQQIEHLNK,IQRPPEDSIQPYEK	GGTLTQYEGK,INKESLLPVAK,IQRPPEDSIQPYEK,NENTFLDLTVQQIEHLNK,LVEIAQVPK
Q16543	CDC37	Hsp90 co-chaperone Cdc37	144	193	0.24	0.33	0.4678	0.4678	4	4	4	4	13.2	13.2	ASEAKEGEEAGPGDPLLEAVPK,AMKEYEEEER,TGDEKDVSV,LQAEAQQLR	ASEAKEGEEAGPGDPLLEAVPK,AMKEYEEEER,TGDEKDVSV,LQAEAQQLR
Q9NTK5	OLA1	obg-like ATPase 1 isoform 1	112	230	0.15	0.33	0.21153	0.6156	2	5	2	5	6	13.6	IGIVGLPNVGK,NYIVEDGDIIFFK	YLEANMTQSALPK,IGIVGLPNVGK,NYIVEDGDIIFFK,LQELSAEER,FNTPQQPK
Q9BUH6	C9orf142	Protein PAXX	54	92	0.15	0.33	0.21153	0.4678	1	2	1	2	5.8	11.7	FGLSAAEDITPR	FGLSAAEDITPR,CPGESLINPGFK
P43304-2	GPD2	PREDICTED: glycerol-3-phosphate dehydrogenase, mitochondrial isoform X3	116	241	0.15	0.33	0.12884	0.35388	2	5	2	5	3.9	10.4	SADTQSISR,LAFLNVQAAEEALPR	LVSEFPYIEAEVK,CVINATGPFTDSVR,SADTQSISR,SMAEDTINAAVK,LAFLNVQAAEEALPR
Q9UJZ1-2	STOML2	stomatin-like protein 2, mitochondrial isoform b	36	166	0.1	0.33	0.19378	0.70125	1	3	1	3	5.4	13.8	NTVVLFVPQQEAWVVER	APVPGTPDSLSSGSSR,NTVVLFVPQQEAWVVER,ATVLESEGTR
P31040-2	SDHA	succinate dehydrogenase [ubiquinone] flavoprotein subunit, mitochondrial isoform 2	153	357	0.1	0.33	0.2798	0.63789	4	7	4	7	7.9	17.3	TEDGKIYQR,NTVVATGGYGR,IDEYDYSKPIQGQQK,GVIALCIEDGSIHR	NTVVATGGYGR,VSDSISAQYPVVDHEFDAVVVGAGGAGLR,AAFGLSEAGFNTACVTK,GEGGILINSQGER,AFGGQSLK,IDEYDYSKPIQGQQK,GVIALCIEDGSIHR
P61221	ABCE1	ATP-binding cassette sub-family E member 1	69	274	0.1	0.33	0.1721	0.61026	2	6	2	6	5.5	12.1	ADIFMFDEPSSYLDVK,EGINIFLDGYVPTENLR	GTVGSILDR,GSELQNYFTK,NVEDLSGGELQR,VAETANEEEVKK,EGINIFLDGYVPTENLR,AIIKPQYVDQIPK
P18124	RPL7	60S ribosomal protein L7	97.5	152	0.245	0.325	0.46653	0.95565	3	5	3	5	14.9	22.1	ASINMLR,TTHFVEGGDAGNREDQINR,IALTDNALIAR	ASINMLR,EANNFLWPFK,SVNELIYK,IALTDNALIAR,TTHFVEGGDAGNREDQINR
P47897-2	QARS	glutamine--tRNA ligase isoform b	240	259.5	0.2	0.325	0.3895	0.40281	7	15	7	12	11.3	18.3	TVTLKEDPGKV,TDFKEEPEPGFKR,LVMEDGKMDPVAYR,TPGYVVTPHTMNLLK,NSALSAQLR,AINFNFGYAK,GFHQVPFAPIVFIER	LNLHYAVVSK,DRPMEESLLLFEAMR,TVTLKEDPGKV,LAWGQPVGLR,LVMEDGKMDPVAYR,NSALSAQLR,TPGYVVTPHTMNLLK,FSEGEATLR,AINFNFGYAK,HTGYVIELQHVVK,ANNGICFLR,GFHQVPFAPIVFIER
Q15019-2	SEPT2	septin-2 isoform b	113	196	0.23	0.32	0.36887	0.51991	3	4	3	4	9.5	13.1	TIISYIDEQFER,ASIPFSVVGSNQLIEAK,VNIVPVIAK	TVQIEASTVEIEER,TIISYIDEQFER,ASIPFSVVGSNQLIEAK,VNIVPVIAK
O14979-2	HNRPDL,HNRNPDL	JKTBP1	36	106	0.1	0.32	0.3895	0.63789	1	3	1	3	5.6	8.3	FGEVVDCTIKTDPVTGR	FGEVVDCTIK,FGEVVDCTIKTDPVTGR,GFGFVLFK
P10515	DLAT	dihydrolipoyllysine-residue acetyltransferase component of pyruvate dehydrogenase complex, mitochondrial precursor	88	205	0.1	0.32	0.1721	0.37382	2	6	2	5	4.4	8.1	DVPLGTPLCIIVEK,GVETIANDVVSLATK	ISVNDFIIK,VPLPSLSPTMQAGTIAR,SKISVNDFIIK,YLEKPITMLL,GVETIANDVVSLATK
Q96I99	SUCLG2	succinyl-CoA ligase [GDP-forming] subunit beta, mitochondrial isoform 2 precursor	132	191	0.23	0.31	0.40653	0.53174	4	5	4	5	9.7	11.3	ETYLAILMDR,LEGTNVQEAQK,SQAADQITK,MAENLGFVGPLK	ETYLAILMDR,LEGTNVQEAQK,SQAADQITK,LYNLFLK,MAENLGFVGPLK
O00487	PSMD14	26S proteasome non-ATPase regulatory subunit 14	85	115	0.2	0.31	0.35936	0.84785	2	3	2	3	6.4	11.6	AVAVVVDPIQSVK,VVIDAFR	AVAVVVDPIQSVK,AVEEEDKMTPEQLAIK,VVIDAFR
O14828-2	SCAMP3	secretory carrier-associated membrane protein 3 isoform 2	44	123	0.19	0.31	0.29155	1.1544	1	3	1	3	5.6	14.6	TAAANAAAGAAENAFRAP	AQQEFAAGVFSNPAVR,ELQHAALGGTATR,TAAANAAAGAAENAFRAP
P49591	SARS	Serine--tRNA ligase, cytoplasmic	143	276	0.18	0.31	0.30432	0.85879	3	7	3	7	6	15.7	LLIDEAILK,ELVSCSNCTDYQAR,VLDLDLFR	LLIDEAILK,ELVSCSNCTDYQAR,TICAILENYQTEK,VLDLDLFR,EVMQEVAQLSQFDEELYK,FKDPGLVDQLVK,DVTLENR
P49588	AARS	Alanine--tRNA ligase, cytoplasmic	202	420	0.13	0.31	0.30432	0.48962	6	9	6	9	6.7	10.6	NSSHAGAFVIVTEEAIAK,LVSVLQNK,IVAVTGAEAQK,IQSLGDSK,SIDTGMGLER,GLEVTDDSPK	VGAEDADGIDMAYR,NSSHAGAFVIVTEEAIAK,AQTAPNKDVQR,AVYTQDCPLAAAK,LVSVLQNK,IVAVTGAEAQK,IQSLGDSK,SIDTGMGLER,GLEVTDDSPK
Q08J23-2	NSUN2	tRNA (cytosine(34)-C(5))-methyltransferase isoform 2	172	311	0.12	0.31	0.23886	0.53478	4	8	4	8	5	12.5	MNLLTR,ILLTQENPFFR,FYALDPSFPR,GAEQLAEGGR	MNLLTR,KLSSETYSQAK,ILLTQENPFFR,DGQWFTDWDAVPHSR,LQQQQRPEDAEDGAEGGGK,IITVSMEDVK,FYALDPSFPR,GAEQLAEGGR
P35998	PSMC2	26S protease regulatory subunit 7 isoform 1	148	287	0.22	0.3	0.25893	0.84785	3	8	3	8	7.6	21.9	FDDGAGGDNEVQR,ALDEGDIALLK,TYGQSTYSR	FDDGAGGDNEVQR,TKEDEKDDKPIR,VIGSELVQK,LCPNSTGAEIR,LREVVETPLLHPER,KIEFSLPDLEGR,TYGQSTYSR,TMLELINQLDGFDPR
Q14974	KPNB1	importin subunit beta-1 isoform 1	266	407	0.22	0.3	0.50131	0.83953	6	10	6	10	6.9	13.3	WLAIDANAR,VLANPGNSQVAR,DTAAWTVGR,TTLVIMER,LAATNALLNSLEFTK,VAAGLQIK	WLAIDANAR,VLANPGNSQVAR,LLETTDRPDGHQNNLR,DTAAWTVGR,TTLVIMER,ANFDKESER,LAATNALLNSLEFTK,VAAGLQIK,TVSPDRLELEAAQK,LQQVLQMESHIQSTSDR
Q13630	TSTA3	GDP-L-fucose synthase	69	163	0.19	0.3	0.35936	0.35936	2	3	2	3	5.9	9.3	ILVTGGSGLVGK,TYLPDFR	VVADGAGLPGEDWVFVSSK,DADLTDTAQTR,VVADGAGLPGEDWVFVSSKDADLTDTAQTR
P00367	GLUD1	glutamate dehydrogenase 1, mitochondrial precursor	96	219	0.17	0.3	0.33352	0.53993	3	5	3	5	6.2	11.6	TAAYVNAIEK,GASIVEDKLVEDLR,YSTDVSVDEVK	IIAEGANGPTTPEADKIFLER,TAAYVNAIEK,NYTDNELEK,GASIVEDKLVEDLR,YSTDVSVDEVK
Q16881-2	TXNRD1	Isoform 2 of Thioredoxin reductase 1, cytoplasmic	50	245	0.05	0.3	0.2798	0.77828	2	5	2	5	4.9	18.9	FLIATGERPR,QFVPIKVEQIEAGTPGR	SYDYDLIIIGGGSGGLAAAK,QFVPIKVEQIEAGTPGR,YLGIPGDKEYCISSDDLFSLPYCPGK,VVAQSTNSEEIIEGEYNTVMLAIGR,VMVLDFVTPTPLGTR
P02765	AHSG	Alpha-2-HS-glycoprotein	222.67	174.25	0.37667	0.2975	0.92103	0.73922	6	5	6	5	8.7	8.7	QYGFCK,CNLLAEK,CNLLAEKQYGFCK,CDSSPDSAEDVRK,CDSSPDSAEDVR,AHYDLR	QYGFCK,CNLLAEK,CDSSPDSAEDVRK,CDSSPDSAEDVR,AHYDLR
Q92520	WNT16,FAM3C	protein FAM3C precursor	49	72.5	0.29	0.295	0.17877	0.28413	2	3	1	2	5.2	11	MASGAANVVGPK	ICLEDNVLMSGVK,MASGAANVVGPK
P13645	KRT10	Keratin, type I cytoskeletal 10	366.5	209.33	0.505	0.29333	0.71964	0.35607	10	8	10	8	17.1	14.8	LAADDFR,DAEAWFNEK,SLLEGEGSSGGGGR,ALEESNYELEGK,GSLGGGFSSGGFSGGSFSR,VLDELTLTK,VTMQNLNDR,SQYEQLAEQNRK,LASYLDKVR,LASYLDK	LAADDFR,NVSTGDVNVEMNAAPGVDLTQLLNNMR,SLLEGEGSSGGGGR,ALEESNYELEGK,VLDELTLTK,VTMQNLNDR,LASYLDKVR,LASYLDK
P52272-2	HNRNPM	heterogeneous nuclear ribonucleoprotein M isoform b	208	295.67	0.22	0.29	0.31129	0.40044	8	15	8	15	13.3	24.6	MGLAMGGGGGASFDR,MGPGIDR,MGPAIER,INEILSNALK,MGPLGLDHMASSIER,MAAPIDR,MGANSLER,QGGGGGGGSVPGIER	LGSTVFVANLDYK,MGPGIDR,GCGVVKFESPEVAER,FGSGMNMGR,LGGAGMER,VGSEIER,AFITNIPFDVK,INEILSNALK,MGPLGLDHMASSIER,MGANSLER,MGLAMGGGGGASFDR,MGPAIER,MGPAMGPALGAGIER,VGQTIER,QGGGGGGGSVPGIER
Q92973-2	TNPO1	Transportin-1 isoform 2	259	450	0.17	0.29	0.53993	1.0535	6	9	6	9	7.1	13.8	QSSFALLGDLTK,FSDQFPLPLKER,ESQSPDTTIQR,ALVMLLEVR,TLLENTAITIGR,SLSGLILK	FLQFFK,FSDQFPLPLKER,QSSFALLGDLTK,ESQSPDTTIQR,ALVMLLEVR,ICEDSAEILDSDVLDRPLNIMIPK,TLLENTAITIGR,YSDIDIILLKGDVEEDETIPDSEQDIRPR,SLSGLILK
P24534	EEF1B2	Elongation factor 1-beta	75	113	0.13	0.29	0.21153	1.1544	1	3	1	3	5.7	20	SIQADGLVWGSSK	LAQYESKK,SSILLDVKPWDDETDMAKLEECVR,SIQADGLVWGSSK
Q9Y4L1-2	HYOU1	unnamed protein product	110	196	0.11	0.29	0.1721	0.37382	3	5	3	5	4.6	10.1	LAGLFNEQR,TLGGLEMELR,MAIKNPK	AVGKEELGK,RAVLQAAR,LAGLFNEQR,TLGGLEMELR,NINADEAAAMGAVYQAAALSK
O00410-3	IPO5	Importin-5	129	429	0.08	0.29	0.15478	0.6156	3	11	3	11	3.1	14.9	VCDIAAELAR,VIAALLQTMEDQGNQR,NTTAAEEAR	STACQMLVCYAK,TASIKPEVALLDTQDMENMSDDDGWEFVNLGDQQSFGIK,VCDIAAELAR,VIAALLQTMEDQGNQR,KQAEETYENIPGQSK,VAAAESMPLLLECAR,LMVPLLK,VQAHAAAALINFTEDCPK,SLVEIADTVPK,EFQQYLPVVMGPLMK,NTTAAEEAR
P35908	KRT2	Keratin, type II cytoskeletal 2 epidermal	590	277	0.63	0.285	0.86325	0.32896	10	8	10	8	22.3	9.8	SLVGLGGTK,NLDLDSIIAEVK,GFSSGSAVVSGGSR,GGSISGGGYGSGGGK,GSSSGGGYSSGSSSYGSGGR,GGSSSGGGYGSGGGGSSSVK,AAFGGSGGRGSSSGGGYSSGSSSYGSGGR,KYEDEINKR,GGSGGGGSISGGGYGSGGGSGGR,FLEQQNQVLQTK	YEDEINKR,NLDLDSIIAEVK,FASFIDK,FASFIDKVR,KYEDEINKR,VDLLNQEIEFLK,FLEQQNQVLQTK,AQYEEIAQR
O15372	EIF3H	Eukaryotic translation initiation factor 3 subunit H	196	155.5	0.27	0.285	0.2452	0.3332	3	6	3	5	9	14.2	KEGTGSTATSSSSTAGAAGK,EGTGSTATSSSSTAGAAGK,LFMAQALQEYNN	KEGTGSTATSSSSTAGAAGK,EGTGSTATSSSSTAGAAGK,EFTAQNLGK,TAQGSLSLK,LFMAQALQEYNN
Q96QK1	VPS35	Vacuolar protein sorting-associated protein 35	282	368	0.19	0.28	0.36887	0.51991	5	7	5	7	8.4	10.6	ILVGTNLVR,SEDPDQQYLILNTAR,LSQLEGVNVER,PTTQQSPQDEQEKLLDEAIQAVK,TQCALAASK	NYLLQCTR,ILVGTNLVR,HASNMLGELR,SEDPDQQYLILNTAR,LSQLEGVNVER,TQCALAASK,PTTQQSPQDEQEKLLDEAIQAVK
P20042	EIF2S2	Eukaryotic translation initiation factor 2 subunit 2	93	109	0.18	0.28	0.36887	0.36887	3	3	3	3	6.9	8.7	VFNIMR,TGFQAVTGK,SPDTILQK	DYTYEELLNR,SPDTILQK,TSFVNFTDICK
Q9NX63	CHCHD3	MICOS complex subunit MIC19	59	114.5	0.13	0.28	0.13646	0.30213	1	3	1	3	3.9	14	AAANEQLTR	YSGAYGASVSDEELK,AAANEQLTR,VTTEQYQK
Q00325-2	SLC25A3	phosphate carrier protein, mitochondrial isoform b precursor	68	98	0.08	0.28	0.19047	0.34033	3	9	3	7	6.9	18.5	IQTQPGYANTLR,IQTQPGYANTLRDAAPK,GVAPLWMR	IQTQPGYANTLR,GVAPLWMR,FACFER,MYKEEGLK,TVEALYK,GSSASLVLKR,GIFNGFSVTLKEDGVR
P14866-2	HNRNPL	heterogeneous nuclear ribonucleoprotein L isoform b	60	149	0.06	0.28	0.31113	0.71907	2	4	2	4	6.3	11.4	ISRPGDSDDSR,SKPGAAMVEMADGYAVDR	LCFSTAQHAS,ISRPGDSDDSR,VFNVFCLYGNVEK,SKPGAAMVEMADGYAVDR
Q3ZCQ8-2	TIMM50	Mitochondrial import inner membrane translocase subunit TIM50	41	142	0.06	0.28	0.11588	0.55052	1	4	1	4	2.6	10.5	RAPDQAAEIGSR	QSRLEQEEQQR,VVVVDCKK,TVLEHYALEDDPLAAFK,RAPDQAAEIGSR
P04264	KRT1	Keratin, type II cytoskeletal 1	619	214	0.835	0.2725	1.1017	0.39183	18	12	18	12	21.1	16.1	YEDEINKR,TNAENEFVTIKK,DVDGAYMTK,AQYEDIAQK,AEAESLYQSKYEELQITAGR,NKYEDEINKR,SISISVAR,GSGGGSSGGSIGGR,SKAEAESLYQSK,YEELQITAGR,TNAENEFVTIK,GSGGGSSGGSIGGRGSSSGGVK,SKAEAESLYQSKYEELQITAGR,LALDLEIATYR,SLVNLGGSK,FLEQQNQVLQTK,AEAESLYQSK,SLDLDSIIAEVK	YEDEINKR,TNAENEFVTIKK,DVDGAYMTK,AQYEDIAQK,NKYEDEINKR,LALDLEIATYR,SLVNLGGSK,FLEQQNQVLQTK,AEAESLYQSK,YEELQITAGR,NKYEDEINK,SLDLDSIIAEVK
P54136-2	RARS	Isoform Monomeric of Arginine--tRNA ligase, cytoplasmic	154	258	0.27	0.27	0.30103	0.3895	5	5	4	5	6.9	9.8	EIAENITK,VIVDFSSPNIAK,LANIDEEMLQK,STIIGESISR	LFEFAGYDVLR,VIVDFSSPNIAK,IVFVPGCSIPLTIVK,LNDYIFSFDK,STIIGESISR
O75083	WDR1	WD repeat-containing protein 1 isoform 1	143	232	0.15	0.27	0.23285	0.51991	3	6	3	6	7.2	15.6	VFASLPQVER,GPVTDVAYSHDGAFLAVCDASK,IKDIAWTEDSKR	LYSILGTTLKDEGK,VFASLPQVER,YAPSGFYIASGDVSGK,FGAVFLWDSGSSVGEITGHNK,GPVTDVAYSHDGAFLAVCDASK,IKDIAWTEDSKR
P08237-3	PFKM	ATP-dependent 6-phosphofructokinase, muscle type isoform 1	149	271	0.15	0.27	0.25893	0.41254	4	7	4	6	5	7.9	GGTPSAFDR,VGIFTGAR,TFVLEVMGR,IMEIVDAITTTAQSHQR	GGTPSAFDR,VGIFTGAR,LPLMECVQVTK,TFVLEVMGR,SGSHTVAVMNVGAPAAGMNAAVR,IGLIQGNR
P25787	PSMA2	Proteasome subunit alpha type-2	45	81	0.13	0.27	0.25893	1.5119	1	4	1	3	5.9	14.1	HIGLVYSGMGPDYR	LTPTEVKDYLAAIA,AANGVVLATEKK,SILYDER
P26368-2	U2AF2	splicing factor U2AF 65 kDa subunit isoform b	76	140	0.13	0.27	0.33352	0.53993	2	4	2	3	7.4	11.2	IFVEFTSVFDCQK,SVDETTQAMAFDGIIFQGQSLK	IFVEFTSVFDCQK,SVDETTQAMAFDGIIFQGQSLK,SIEIPRPVDGVEVPGCGK
Q9NSD9	FARSB	Phenylalanine--tRNA ligase beta subunit	104	235	0.1	0.27	0.30103	0.58489	3	6	3	6	6.6	11	AAGASDVVLYK,DLLFQALGR,LFEISDIVIKDSNTDVGAK	AAGASDVVLYK,DLLFQALGR,LFEISDIVIKDSNTDVGAK,ETPENLAK,IDVPANRYDLLCLEGLVR,LFEISDIVIK
Q9H6S3	EPS8L2	epidermal growth factor receptor kinase substrate 8-like protein 2	127	257	0.08	0.27	0.30103	0.58489	4	7	4	7	6.8	10.9	KAPAEGVLTLR,GYQPTPAMAK,ILYDFTAR,LLDIESQEELEDFPLPTVQR	KAPAEGVLTLR,VCGEEGVR,DAVDFLR,SEWPREPQVPLYVPK,ILYDFTAR,SQTVLNQLR,LLDIESQEELEDFPLPTVQR
P28331-2	NDUFS1	NADH-ubiquinone oxidoreductase 75 kDa subunit, mitochondrial isoform 5	38	324	0.04	0.27	0.060818	0.51178	1	7	1	7	1.3	11.7	SATYVNTEGR	FEAPLFNAR,VLFLLGADGGCITR,GLLTYTSWEDALSR,ALSEIAGMTLPYDTLDQVR,SATYVNTEGR,VAVTPPGLAR,VVAACAMPVMK
Q9P2E9-3	RRBP1	Isoform 2 of Ribosome-binding protein 1	73	455	0.03	0.27	0.085711	0.50859	2	10	2	10	1.8	12.5	LQSSEAEVR,AENSQLTER	SIEALLEAGQAR,NTDVAQSPEAPKQEAPAK,LQQENSILR,TTQEQLAR,LQSSEAEVR,QSDELALVR,TQLEWTEAILEDEQTQR,LLATEQEDAAVAK,TAGPLESSETEEASQLKER,AENSQLTER
Q9Y6E2	BZW2	Basic leucine zipper and W2 domain-containing protein 2	149	141	0.22	0.265	0.2798	0.28413	3	5	3	4	8.5	10.9	FLDSTGSR,DTLVQGLNEAGDDLEAVAK,LLELFPVNR	DTLVQGLNEAGDDLEAVAK,FLDSTGSR,LLELFPVNR,HQKPVLTGQR
P50502	ST13	hsc70-interacting protein isoform 1	208	204	0.26	0.26	0.53993	0.77828	4	4	4	4	10.2	11.9	VMNLISK,RASVFVK,VAAIEALNDGELQK,AIDLFTDAIK	AIEINPDSAQPYK,VMNLISK,VAAIEALNDGELQK,AIDLFTDAIK
P12268	IMPDH2	inosine-5'-monophosphate dehydrogenase 2	141	264	0.19	0.26	0.33352	0.77828	3	6	3	6	6	13.8	VAQGVSGAVQDK,NLIDAGVDALR,EANEILQR	VAQGVSGAVQDK,NLIDAGVDALR,LVGIISSR,REDLVVAPAGITLK,GKLPIVNEDDELVAIIAR,EANEILQR
P26196	DDX6	Probable ATP-dependent RNA helicase DDX6	105	155	0.19	0.26	0.31826	0.44544	3	4	3	4	11.1	13.2	GPVKPTGGPGGGGTQTQQQMNQLK,SGAYLIPLLER,SIEEQLGTEIKPIPSNIDK	GVTQYYAYVTER,GPVKPTGGPGGGGTQTQQQMNQLK,SGAYLIPLLER,SLYVAEYHSEPVEDEKP
O15143	ARPC1B	Actin-related protein 2/3 complex subunit 1B	77	111	0.16	0.26	0.4678	0.4678	2	3	2	3	8.8	8.6	ASSEGGTAAGAGLDSLHK,WAPNENKFAVGSGSR	FQNLDK,VAWVSHDSTVCLADADKK,NAYVWTLK
Q9BVK6	TMED9	Transmembrane emp24 domain-containing protein 9 precursor	46	55	0.12	0.26	0.33352	0.43672	2	3	1	2	7.2	14.4	QLVEQVEQIQKEQNYQR	CFIEEIPDETMVIGNYR,QLVEQVEQIQKEQNYQR
P13995-2	MTHFD2	methylenetetrahydrofolate dehydrogenase (NADP+ dependent) 2, methenyltetrahydrofolate cyclohydrolase, isoform CRA_b	75	128	0.12	0.26	0.3895	0.3895	2	2	2	2	9.2	9.2	LVGDVDFEGVR,EGAAVIDVGINR	LVGDVDFEGVR,EGAAVIDVGINR
P33991	MCM4	DNA replication licensing factor MCM4	185	370	0.10667	0.26	0.17325	0.60157	7	8	7	8	12.5	15.5	TGIVDISILTTGMSATSR,LSEEASQALIEAYVDMRK,GLQVDLQSDGAAAEDIVASEQSLGQK,EALKQSATDPR,LSEEASQALIEAYVDMR,LGEINVIGEPFLNVNCEHIK,LSNKVEAIDVEEAKR	GLQVDLQSDGAAAEDIVASEQSLGQK,LSEEASQALIEAYVDMR,LGEINVIGEPFLNVNCEHIK,AGIICQLNAR,IAEPSVCGR,LSNKVEAIDVEEAKR,ALADDDFLTVTGK,FIDPLAKEEENVGIDITEPLYMQR
P62195-2	PSMC5	26S protease regulatory subunit 8 isoform 2	184	169	0.33	0.25	0.44544	0.39358	4	6	4	6	13.8	19.3	GVLLYGPPGTGK,IEELQLIVNDK,EHAPSIIFMDEIDSIGSSR,LEGGSGGDSEVQR	VSGSELVQK,IDILDSALLRPGR,GVLLYGPPGTGK,IEELQLIVNDK,EHAPSIIFMDEIDSIGSSR,LEGGSGGDSEVQR
P14314-2	PRKCSH	glucosidase 2 subunit beta isoform 2 precursor	231	169.5	0.3	0.25	1.4484	0.86999	7	9	7	7	12.7	12.7	ESLQQMAEVTR,ILIEDWK,NKFEEAER,TVKEEAEKPER,SLEDQVEMLR,LWEEQLAAAK,SLKDMEESIR	ESLQQMAEVTR,ILIEDWK,NKFEEAER,SLEDQVEMLR,TVKEEAEKPER,LWEEQLAAAK,SLKDMEESIR
P26639-2	TARS	threonine--tRNA ligase, cytoplasmic isoform 2	218	276	0.16	0.25	0.29908	0.36887	5	7	5	7	7.5	9.5	FLGDIEVWDQAEK,NELSGALTGLTR,TISETIER,GFQEVVTPNIFNSR,IYGISFPDPK	FLGDIEVWDQAEK,NELSGALTGLTR,TISETIER,GFQEVVTPNIFNSR,QVDAESWK,IYGISFPDPK,MLKEWEK
Q96HS1-2	PGAM5	serine/threonine-protein phosphatase PGAM5, mitochondrial isoform 3	60	122	0.12	0.25	0.15478	0.53993	1	3	1	3	3.9	11.3	AIETTDIISR	AIETTDIISR,NVESGEEELASK,HLPGVCK
Q02218-2	OGDH	2-oxoglutarate dehydrogenase, mitochondrial isoform 3 precursor	239	307	0.12	0.25	0.33352	0.4678	6	9	6	8	6.7	8.7	VYYDLTR,LSGQDVER,STRFEEFLQR,FGLEGCEVLIPALK,SWDIFFR,NITLSLVANPSHLEAADPVVMGK	DMVGQVAITR,VYYDLTR,LSGQDVER,VVNAPIFHVNSDDPEAVMYVCK,STRFEEFLQR,FGLEGCEVLIPALK,SWDIFFR,DPAAAPATGNK
Q16531	DDB1	DNA damage-binding protein 1	143	408	0.08	0.25	0.19378	0.70125	4	13	4	12	6.5	13.5	SVLLLAYKPMEGNFEEIAR,IGRPSETGIIGIIDPECR,MQEVVANLQYDDGSGMKR,SDPNRETDDTLVLSFVGQTR	EATADDLIK,YLLGDMEGR,SVLLLAYKPMEGNFEEIAR,TVPLYESPR,GESKDLLFILTAK,QSGESIDIITR,TYEVSLR,IGRPSETGIIGIIDPECR,TKGDFILVGDLMR,ALYYLQIHPQELR,QGQGQLVTCSGAFK,SDPNRETDDTLVLSFVGQTR
Q9Y2S7	POLDIP2	polymerase delta-interacting protein 2 isoform 1	72	91	0.08	0.25	0.2452	0.3895	2	3	2	3	5.9	10.3	GVVLFPWQAR,VLETVGVFEVPK	SQTEAVTFLANHDDSR,GVVLFPWQAR,VLETVGVFEVPK
Q13409-2	DYNC1I2	PREDICTED: cytoplasmic dynein 1 intermediate chain 2 isoform X4	35	178	0.05	0.25	0.11034	0.51991	1	4	1	4	3.3	10.2	SVSTPSEAGSQDSGDGAVGSR	NDEWAR,SVSTPSEAGSQDSGDGAVGSR,EIAVGDSEGQIVIYDVGEQIAVPR,EAVAPVQEESDLEK
P28070	PSMB4	Proteasome subunit beta type-4	67	95	0.24	0.24	0.21153	0.21153	2	2	2	2	5.6	5.6	EVLEKQPVLSQTEAR,QPVLSQTEAR	EVLEKQPVLSQTEAR,QPVLSQTEAR
O43813	LANCL1	LanC-like protein 1	98	125.5	0.15	0.24	0.31113	0.55673	2	5	2	5	5	11.7	SLAEGYFDAAGR,QAEDCITR	AFPNPYADYNK,SLAEGYFDAAGR,LTPEFSQR,ARFPAFEL,QAEDCITR
Q13148	TARDBP	TAR DNA-binding protein 43	70	116	0.15	0.24	0.35936	0.35936	2	4	2	4	4.8	6.7	QSQDEPLR,KMDETDASSAVK	QLERSGR,QSQDEPLR,RKMDETDASSAVK,KMDETDASSAVK
P53992	SEC24C	Protein transport protein sec24c	202	490	0.11	0.24	0.41254	0.88365	6	11	6	11	6.9	12.1	YASFQVENDQER,GTEPFVTGVR,SPVESTTEPPAVR,GLIDSLR,GQVPPLVTTNFLVK,LPPEEASPYVVDHGESGPLR	GVLNSPVK,EGGAEESAIR,VVGFDAVMR,YASFQVENDQER,GTEPFVTGVR,TLFQPQTGAYQTLAK,SPVESTTEPPAVR,SDVLQPGAEVTTDDR,GLIDSLR,GQVPPLVTTNFLVK,LPPEEASPYVVDHGESGPLR
P26599-2	PTBP1	polypyrimidine tract-binding protein 1 isoform b	88	202	0.11	0.24	0.4678	0.6681	3	4	3	4	5.4	10	EGQEDQGLTKDYGNSPLHR,VLFSSNGGVVK,EGQEDQGLTK	NNQFQALLQYADPVSAQHAK,LSLDGQNIYNACCTLR,VLFSSNGGVVK,VTNLLMLK
P04040	CAT	catalase	78	135	0.11	0.24	0.18597	0.53174	2	4	2	4	5.1	12.5	FSTVAGESGSADTVRDPR,NLSVEDAAR	ADVLTTGAGNPVGDKLNVITVGPR,LGPNYLHIPVNCPYR,FSTVAGESGSADTVRDPR,NLSVEDAAR
Q9H4M9	EHD1	EH domain-containing protein 1 isoform 1	63	251	0.11	0.24	0.26896	0.48735	2	5	2	5	7.8	13.1	KLFEAEEQDLFKDIQSLPR,LADVDKDGLLDDEEFALANHLIK	LFEAEEQDLFKDIQSLPR,EHQISPGDFPSLR,KLFEAEEQDLFKDIQSLPR,LADVDKDGLLDDEEFALANHLIK,LLDTVDDMLANDIAR
Q8NC51-2	SERBP1	plasminogen activator inhibitor 1 RNA-binding protein isoform 2	64	135.5	0.07	0.24	0.12884	0.27427	1	3	1	2	3.9	6.7	SAAQAAAQTNSNAAGK	RPDQQLQGEGK,SAAQAAAQTNSNAAGK
Q99460-2	PSMD1	26S proteasome non-ATPase regulatory subunit 1 isoform 2	85	281	0.03	0.24	0.15832	0.47983	3	8	3	8	2.9	9.9	TPEASPEPK,VLTMPETCR,QFAALVASK	TPEASPEPK,LEGIVNK,NAQAIEDMVGYAQETQHEK,QDVYDLLK,NNNTDLMILK,VLTMPETCR,QFAALVASK,TPEQCPSVVSLLSESYNPHVR
P52597	HNRNPF	Heterogeneous nuclear ribonucleoprotein F	192	139	0.32	0.235	0.50131	0.40622	4	4	4	4	12.5	12.5	QSGEAFVELGSEDDVK,YIEVFK,RYIGIVK,ITGEAFVQFASQELAEK	QSGEAFVELGSEDDVK,YIEVFK,RYIGIVK,ITGEAFVQFASQELAEK
P61160-2	ACTR2	actin-related protein 2 isoform a	71	65	0.15	0.23	0.13646	0.13646	2	3	2	2	4.7	5	RLDIAGR,ILLTEPPMNPTK	ILLTEPPMNPTK,IIKVGGER
Q9Y277-2	VDAC3	Voltage-dependent anion-selective channel protein 3 isoform 2	62	104	0.11	0.23	0.35936	0.35936	2	2	2	2	7.3	7.3	LSQNNFALGYK,LTLSALIDGK	LSQNNFALGYK,LTLSALIDGK
Q93084-2	ATP2A3	sarcoplasmic/endoplasmic reticulum calcium ATPase 3 isoform a	164	370	0.09	0.23	0.2452	0.4678	4	8	4	8	6.2	8.9	KAEIGIAMGSGTAVAK,VGEATETALTCLVEK,EFTLEFSR,ARDIVPGDIVEVAVGDKVPADLR	AEIGIAMGSGTAVAK,MNVFDTDLQALSR,AYTGREFDDLSPEQQR,AGACNTVIK,KAEIGIAMGSGTAVAK,VGEATETALTCLVEK,EFTLEFSR,IRDWGSGSDTLR
O43143	DHX15	Pre-mRNA-splicing factor ATP-dependent RNA helicase DHX15	135	372	0.07	0.23	0.20526	0.75083	3	8	3	8	3.6	12.5	YGVIILDEAHER,YYDILK,SNLGSVVLQLK	HQSFVLVGETGSGK,EAMNDPLLER,THPVEIFYTPEPERDYLEAAIR,YGVIILDEAHER,RGVACTQPR,VAAMSVAQR,SNLGSVVLQLK,EVDDLGPEVGDIK
Q9UGI8-2	TES	testin isoform 2	184	149	0.3	0.22	0.64965	0.22168	4	3	4	3	12.3	6.3	NVMILTNPVAAK,EKQPVAGSEGAQYR,LFEDTKYTTLIAK,STPAAVGAMEDK	EKQPVAGSEGAQYR,QPVAGSEGAQYR,STPAAVGAMEDK
P61353	RPL27	60S ribosomal protein L27	41	47	0.22	0.22	0.4678	0.4678	1	2	1	2	6.6	11	YSVDIPLDK	YSVDIPLDK,VKFEER
P31939-2	ATIC	Isoform 2 of Bifunctional purine biosynthesis protein PURH	157	227	0.22	0.22	0.45265	0.45265	6	6	6	6	11.8	13.5	GVSQMPLR,YTQSNSVCYAK,VVACNLYPFVK,SLFSNVVTK,DVSELTGFPEMLGGR,ALFEEVPELLTEAEKK	YTQSNSVCYAK,TLTPISAAYAR,VVACNLYPFVK,LTEVSISSDAFFPFRDNVDR,SLFSNVVTK,YGMNPHQTPAQLYTLQPK
Q9UHD8-2	SEPT9	septin-9 isoform c	94.5	148.5	0.16	0.22	0.21153	0.29419	4	6	4	6	8.2	14.7	VVNIVPVIAK,YLQEEVNINR,LEPKPQPPVAEATPR,QVENAGAIGPSR	VPEVPTAPATDAAPK,VVNIVPVIAK,YLQEEVNINR,LEPKPQPPVAEATPR,QVENAGAIGPSR,NEKAPVDFGYVGIDSILEQMRR
P09874	PARP1	Poly [ADP-ribose] polymerase 1	205	408	0.12	0.22	0.1823	0.45759	4	8	4	8	4.7	9.6	AEPVEVVAPR,VVDRDSEEAEIIR,VVSEDFLQDVSASTK,GIYFADMVSK	TTNFAGILSQGLR,AEPVEVVAPR,VVDRDSEEAEIIR,GGSDDSSKDPIDVNYEK,KLTVNPGTK,VVSEDFLQDVSASTK,TLGDFAAEYAK,GIYFADMVSK
O43776	NARS	Asparagine--tRNA ligase, cytoplasmic	55	137	0.11	0.22	0.17877	0.3895	2	4	2	4	3.8	9.8	IFDSEEILAGYKR,NLMFLVLR	IFDSEEILAGYKR,SPAGSIVHELNPNFQPPK,EGIDPTPYYWYTDQR,NLMFLVLR
P27105	STOM	erythrocyte band 7 integral membrane protein isoform a	109	89	0.1	0.22	0.35936	0.35936	4	3	3	2	7.6	6.9	VIAAEGEMNASR,AKVIAAEGEMNASR,LLAQTTLR	VIAAEGEMNASR,LLAQTTLR
Q9NSE4	IARS2	isoleucine--tRNA ligase, mitochondrial precursor	174	438	0.09	0.22	0.1514	0.75751	4	11	4	11	4.6	14.3	AVLEEGTDVVIK,EAQNLSAMEIR,TALAEAELEYNPEHVSR,NLLKEEK	EMTADVIELK,QWFINITDIK,VLSELGR,AVLEEGTDVVIK,EAQNLSAMEIR,YTAESSDTLCPR,TALAEAELEYNPEHVSR,FLINLEGGDIREESSYK,SLGNVIHPDVVVNGGQDQSKEPPYGADVLR,QQPDTELEIQQK,NLLKEEK
P18754-2	RCC1	regulator of chromosome condensation isoform a	48	112	0.07	0.22	0.50131	0.71907	2	3	2	3	7.5	10.1	DTSVEGSEMVPGKVELQEK,SMVPVQVQLDVPVVK	DTSVEGSEMVPGKVELQEK,VFLWGSFR,VVQVSAGDSHTAALTDDGR
P11216	PYGB	Glycogen phosphorylase, brain form	95	342	0.07	0.22	0.096478	0.38038	2	7	2	7	2.3	10.2	VIFLENYR,GLAGLGDVAEVR	VEDVEALDR,VLYPNDNFFEGK,LLPLVSDEVFIR,IVNGWQVEEADDWLR,VIFLENYR,LVTSIGDVVNHDPVVGDR,GLAGLGDVAEVR
P40939	HADHA	trifunctional enzyme subunit alpha, mitochondrial precursor	181	229	0.21	0.21667	0.3434	0.44686	5	14	5	14	11.1	25.9	MGLVDQLVEPLGPGLKPPEER,GFYIYQEGVK,HVAEDLGKVFGER,TVLGTPEVLLGALPGAGGTQR,ELHSEFSEVMNEIWASDQIR	ILQEGVDPK,TGIEQGSDAGYLCESQK,MGLVDQLVEPLGPGLKPPEER,SEVSSDEDIQFR,GQQQVFK,DSIFSNLTGQLDYQGFEK,DTSASAVAVGLK,GFYIYQEGVK,TILKDATLTALDR,DGPGFYTTR,TVLGTPEVLLGALPGAGGTQR,FGGGNPELLTQMVSK,ELHSEFSEVMNEIWASDQIR,TLQEVTQLSQEAQR
P31153-2	MAT2A	unnamed protein product	53	91	0.1	0.215	0.17877	0.40833	1	3	1	3	5	13.7	FVIGGPQGDAGLTGR	FVIGGPQGDAGLTGR,YLDEDTIYHLQPSGR,TQVTVQYMQDR
P12532-2	CKMT1A,CKMT1B	unnamed protein product	245.5	141	0.41	0.21	0.68283	0.35031	11	3	11	3	26.1	9.1	SFLIWVNEEDHTR,VVVDALSGLKGDLAGR,TTPTGWTLDQCIQTGVDNPGHPFIK,RGTGGVDTAATGGVFDISNLDR,GTGGVDTAATGGVFDISNLDR,GWEFMWNER,SGYFDER,GLKEVER,VVVDALSGLK,SGYFDERYVLSSR,TMKHTTDLDASK	SFLIWVNEEDHTR,GTGGVDTAATGGVFDISNLDR,SGYFDER
Q15388	TOMM20	Mitochondrial import receptor subunit TOM20 homolog	82	87	0.21	0.21	1.1544	1.1544	2	2	2	2	13.7	13.7	LPTISQR,IVSAQSLAEDDVE	LPTISQR,IVSAQSLAEDDVE
Q9NVA2-2	SEPT11	septin-11 isoform 1	101	117	0.21	0.21	0.35031	0.35031	3	3	3	3	8.6	5.9	VNIIPIIAK,SYELQESNVR,AAAQLLQSQAQQSGAQQTK	VNMEDLR,VNIIPIIAK,SYELQESNVR
P30153	PPP2R1A	serine/threonine-protein phosphatase 2A 65 kDa regulatory subunit A alpha isoform	190	208	0.21	0.21	0.32194	0.32194	4	4	4	4	8.4	8.6	MAGDPVANVR,LTQDQDVDVK,IGPILDNSTLQSEVKPILEK,LAGGDWFTSR	MAGDPVANVR,NLCSDDTPMVR,LTQDQDVDVK,IGPILDNSTLQSEVKPILEK
P54920	NAPA	alpha-soluble nsf attachment protein	64	121	0.21	0.21	0.27427	0.27427	2	2	2	2	6.7	7.7	IEEACEIYAR,TIQGDEEDLR	IEEACEIYAR,VAGYAALLEQYQK
P50895	BCAM	basal cell adhesion molecule isoform 1 precursor	128	214	0.15	0.21	0.26896	0.37382	3	4	3	4	5.7	8.7	SPPYQLDSQGR,AGAAGTAEATAR,VAYLDPLELSEGK	SPPYQLDSQGR,LASAEMQGSELQVTMHDTR,AGAAGTAEATAR,VAYLDPLELSEGK
Q07960	ARHGAP1	rho GTPase-activating protein 1	70	129	0.13	0.21	0.21153	0.33352	2	3	2	3	7.2	10.9	HQIVEVAGDDKYGR,FLLDHQGELFPSPDPSGL	VPATLQVLQTLPEENYQVLR,FLLDHQGELFPSPDPSGL,AINPINTFTK
P21964-2	COMT	catechol O-methyltransferase isoform S-COMT	44.5	64.5	0.13	0.21		0.25893	1	2	1	2	5.4	12.6	AIYKGPGSEAGP	LITIEINPDCAAITQR,AIYKGPGSEAGP
Q14764	MVP	major vault protein isoform 1	207	287	0.1	0.21	0.36887	0.44242	6	7	6	7	7.2	9.9	LLQSLGLK,SLQPLAPR,DAQGLVLFDVTGQVR,IEGEGSVLQAK,LFSVPDFVGDACK,GPLEYVPSAK	DAQGLVLFDVTGQVR,IEGEGSVLQAK,QAIPLDENEGIYVQDVK,LFSVPDFVGDACK,VPHNAAVQVYDYR,GPLEYVPSAK,AQQLAEVEVK
Q8N163-2	CCAR2	Isoform 2 of Cell cycle and apoptosis regulator protein 2	146	244	0.1	0.21	0.16203	0.35031	3	6	3	6	3.5	7.4	VVTQNICQYR,LAEAEETAR,VLLLSSPGLEELYR	FSATEVTNK,VVTQNICQYR,STKPGAAPTEHK,LAEAEETAR,SPAPPLLHVAALGQK,VLLLSSPGLEELYR
P35221-2	CTNNA1	Isoform 2 of Catenin alpha-1	78	295	0.06	0.21	0.092601	0.4251	2	7	2	7	2.3	10.7	IVAECNAVR,NAGNEQDLGIQYK	AIMAQLPQEQK,SKLDAEVSKWDDSGNDIIVLAK,VIHVVTSEMDNYEPGVYTEK,IVAECNAVR,NAGNEQDLGIQYK,IAEQVASFQEEK,QIIVDPLSFSEER
Q9BXP5-2	SRRT	serrate RNA effector molecule homolog isoform d	55	167	0.03	0.21	0.15832	0.27756	2	5	2	5	3	7.5	AGAGLGDGER,AIVEYRDLDAPDDVDFF	AGAGLGDGER,ILEQEEEEEQAGKPGEPSKKEEGR,DLDAPDDVDFF,EVAFFNNFLTDAK,AEIISLCK
O14980	XPO1	Exportin-1	194	322	0.11	0.2	0.19793	0.37169	4	7	4	7	5.6	8.6	LLSEEVFDFSSGQITQVK,ETLVYLTHLDYVDTER,MAKPEEVLVVENDQGEVVR,LISGWVSR	YVVGLIIK,LLSEEVFDFSSGQITQVK,ETLVYLTHLDYVDTER,TSESLCQNNMVILK,MAKPEEVLVVENDQGEVVR,QMLPLNTNIR,LISGWVSR
P0DME0	SETSIP,SETP18	Protein SETSIP	43	93	0.1	0.2	0.25893	0.58489	2	3	2	3	6.6	11.2	EFHLNESGDPSSK,RSELIAK	EFHLNESGDPSSK,RSELIAK,VEVTEFEDIKSGYR
Q9BY42	RTFDC1	protein RTF2 homolog isoform b	54	89	0.1	0.2	0.13646	0.29155	2	2	2	2	6.8	10.1	AAESVSKPDVSEEAPGPSK,AAESVSKPDVSEEAPGPSKVK	AAESVSKPDVSEEAPGPSK,SIADSEESEAYK
P09110-2	ACAA1	3-ketoacyl-CoA thiolase, peroxisomal isoform b	34	86	0.09	0.2	0.21153	0.77828	1	4	1	3	3.9	13.2	EKQDTFALASQQK	EKQDTFALASQQK,QVITLLNELK,SITVTQDEGIRPSTTMEGLAK
Q15029-2	EFTUD2	116 kDa U5 small nuclear ribonucleoprotein component isoform b	82	317	0.06	0.2	0.098541	0.32571	2	6	2	6	2	8.2	GGGQIIPTAR,YDWDLLAAR	IAVEPVNPSELPK,IYADTFGDINYQEFAK,GGGQIIPTAR,VADPVVTFCETVVETSSLK,YDWDLLAAR,LWGDIYFNPK
O43390-2	HNRNPR	Heterogeneous nuclear ribonucleoprotein R isoform 1	124	253.5	0.095	0.195	0.19786	0.33352	3	6	3	6	5.9	10.6	DLYEDELVPLFEK,TGYTLDVTTGQR,NLATTVTEEILEK	AGPIWDLR,VQESTKGPDEAK,GYAFITFCGK,DLYEDELVPLFEK,TGYTLDVTTGQR,NLATTVTEEILEK
Q9H4A4	RNPEP	aminopeptidase B	67	205	0.065	0.195	0.11863	0.36084	2	8	2	8	3.5	19	GLSGTAVLDLR,AFFPCFDTPAVK	LFGPYVWGR,LGDTYPSISNAR,VKIEPGVDPDDTYNETPYEK,VDIIPGFEFDR,GLSGTAVLDLR,AFFPCFDTPAVK,AEFGPPGPGAGSR,ERPGSEEPPAEPVSFYTQPFSHYGQALCVSFPQPCR
Q07020-2	RPL18	60S ribosomal protein L18 isoform 2	103	59	0.41	0.19	1.1544	0.4678	2	1	2	1	15	8.1	GCGTVLLSGPR,TAVVVGTITDDVR	ILTFDQLALDSPK
Q9BQE5	APOL2	apolipoprotein L2	155	83	0.29	0.19	0.6681	0.29155	4	2	4	2	13	6.5	NLDQSGTNVAK,IHEMLQPGQDQ,ISAEGGEQVER,VVEGPAQAMSR	NLDQSGTNVAK,VVEGPAQAMSR
P24752	ACAT1	acetyl-CoA acetyltransferase, mitochondrial precursor	151	118.5	0.23	0.19	0.33352	0.27252	3	4	3	4	7.9	9.8	EVVIVSATR,NEQDAYAINSYTR,LGSIAIQGAIEK	EVVIVSATR,NEQDAYAINSYTR,LGSIAIQGAIEK,LNVTPLAR
P31943	HNRNPH1	Heterogeneous nuclear ribonucleoprotein H	119.67	158	0.19667	0.19	0.27316	0.40721	4	5	4	5	12.2	13.5	IQNGAQGIR,HTGPNSPDTANDGFVR,STGEAFVQFASQEIAEK,GLPWSCSADEVQR	YIEIFK,IQNGAQGIR,HTGPNSPDTANDGFVR,STGEAFVQFASQEIAEK,GLPWSCSADEVQR
P01857	IGHG1	Ig gamma-1 chain C region	67	106	0.19	0.19	0.35936	0.58489	2	3	2	3	8.1	13	TTPPVLDSDGSFFLYSK,NQVSLTCLVK	TTPPVLDSDGSFFLYSK,GPSVFPLAPSSK,FNWYVDGVEVHNAK
Q9UBQ7	GRHPR	Glyoxylate reductase/hydroxypyruvate reductase	159	143	0.19	0.19	0.35936	0.35936	3	2	3	2	11.8	9.7	RIPAEGR,ILDAAGANLK,AADCEVEQWDSDEPIPAKELER	ILDAAGANLK,AADCEVEQWDSDEPIPAKELER
P16615-2	ATP2A2	sarcoplasmic/endoplasmic reticulum calcium ATPase 2 isoform a	230	338	0.12	0.19	0.28439	0.35031	5	7	5	7	6.8	7	AFTGREFDELNPSAQR,KAEIGIAMGSGTAVAK,VGEATETALTCLVEK,IGIFGQDEDVTSK,EFTLEFSR	AEIGIAMGSGTAVAK,GAPEGVIDR,KAEIGIAMGSGTAVAK,VGEATETALTCLVEK,IGIFGQDEDVTSK,EFTLEFSR,ANACNSVIK
O43684-2	BUB3	Mitotic checkpoint protein BUB3 isoform b	32	107	0.09	0.19	0.16591	0.58489	1	3	1	3	2.1	8.8	VLVWDLR	VLVWDLR,VAVEYLDPSPEVQK,NMGYVQQR
P12429	ANXA3	annexin A3	59	97	0.09	0.19	0.1053	0.22168	1	2	1	2	6.1	7.1	GTVRDYPDFSPSVDAEAIQK	LTFDEYR,GAGTNEDALIEILTTR
O60763-2	USO1	general vesicular transport factor p115 isoform 1	96	335	0.06	0.19	0.23886	0.61921	3	8	3	8	4.7	10.9	GVMGGQSAGPQHTEAETIQK,IVAFENAFER,DSEQVAELKQELATLK	GVMGGQSAGPQHTEAETIQK,SSQTSGTNEQSSAIVSAR,VLVSPTNPPGATSSCQK,IVAFENAFER,VASSTLLDDRR,DSEQVAELKQELATLK,LSALLQETK,HELYSR
P04843	RPN1	dolichyl-diphosphooligosaccharide--protein glycosyltransferase subunit 1 precursor	153.5	213.5	0.26	0.185	0.36276	0.53566	7	10	7	10	12.3	18.4	ALTSEIALLQSR,SEDLLDYGPFR,IDHILDAL,NIEIDSPYEISR,HFDETVNR,NVESYTK,FVDHVFDEQVIDSLTVK	ALTSEIALLQSR,SEDLLDYGPFR,NIEIDSPYEISR,IDHILDAL,HFDETVNR,APDELHYTYLDTFGRPVIVAYK,NVESYTK,QPDSGISSIR,FVDHVFDEQVIDSLTVK,YDYQRQPDSGISSIR
P23588	EIF4B	eukaryotic translation initiation factor 4B isoform 2	39	173	0.05	0.185	0.082637	0.28499	1	7	1	7	2.6	15.2	AASIFGGAKPVDTAAR	DDYSRDDYRR,SRTGSESSQTGTSTTSSR,AASIFGGAKPVDTAAR,SQSSDTEQQSPTSGGGK,TGSESSQTGTSTTSSR,VDVADQAQDKDRDDR,STPKEDDSSASTSQSTR
Q13263-2	TRIM28	tripartite motif-containing 28, isoform CRA_b	338	196.67	0.32	0.18333	0.6681	0.36386	7	8	7	8	17.9	19.3	VSLERLDLDLTADSQPPVFK,LSPPYSSPQEFAQDVGR,MNEAFGDTK,VFPGSTTEDYNLIVIER,LTEDKADVQSIIGLQR,IVAERPGTNSTGPAPMAPPR,QGSGSSQPMEVQEGYGFGSGDDPYSSAEPHVSGVKR	VSLERLDLDLTADSQPPVFK,LSPPYSSPQEFAQDVGR,MNEAFGDTK,LTEDKADVQSIIGLQR,VFPGSTTEDYNLIVIER,IVAERPGTNSTGPAPMAPPR,SGEGEVSGLMR,QGSGSSQPMEVQEGYGFGSGDDPYSSAEPHVSGVKR
Q9NX14-2	NDUFB11	NADH dehydrogenase [ubiquinone] 1 beta subcomplex subunit 11, mitochondrial isoform 1	32	72	0.18	0.18	0.25893	0.99526	1	2	1	2	6.7	22.6	TVVAPSAVAGK	TVVAPSAVAGK,YREANGLPIMESNCFDPSKIQLPEDE
P25205-2	MCM3	DNA replication licensing factor MCM3 isoform 1	198	300	0.18	0.18	0.27427	0.43845	6	9	6	9	9.4	14.1	GSSGVGLTAAVTTDQETGER,IIKPVLTQESATYIAEEYSR,SKDIFDQLAK,TVLIACNVK,LRSQDSMSSDTAR,LIVNVNDLR	GSSGVGLTAAVTTDQETGER,TLETLIR,IIKPVLTQESATYIAEEYSR,EAQRDYLDFLDDEEDQGIYQSK,TVLIACNVK,SKDIFDQLAK,LIVNVNDLR,LRSQDSMSSDTAR,EAHAQSIGMNR
O00303	EIF3F	Eukaryotic translation initiation factor 3 subunit F	57	88	0.09	0.18	0.19378	0.4251	1	2	1	2	2.5	6.7	VSADNTVGR	VSADNTVGR,LHPVILASIVDSYER
Q14376	GALE	UDP-glucose 4-epimerase	61	88	0.09	0.18	0.16591	0.35936	2	3	2	3	2.2	7.1	VQELTGR,RVQELTGR	VQELTGR,RVQELTGR,SVEFEEMDILDQGALQR
Q13501-2	SQSTM1	sequestosome-1 isoform 2	33	101	0.08	0.18	0.21153	0.4678	1	2	1	2	3.9	8.1	LTPVSPESSSTEEK	LTPVSPESSSTEEK,NYDIGAALDTIQYSK
Q8N335	GPD1L	Glycerol-3-phosphate dehydrogenase 1-like protein	44	112	0.08	0.18	0.11034	0.36887	1	3	1	3	1.9	9.1	VAEAFAR	NIVAVGAGFCDGLR,ICDEITGR,GIDEGPEGLK
O95747	OXSR1	Serine/threonine-protein kinase OSR1	83	154	0.06	0.18	0.089023	0.29155	1	3	1	3	2.8	6.6	TAQALSSGSGSQETK	TAQALSSGSGSQETK,IPISLVLR,LLSGGSVLDIIK
P14618-2	PKM	pyruvate kinase PKM isoform b	54	121	0.06	0.18	0.068	0.21819	1	3	1	3	2.4	7.9	NTGIICTIGPASR	GADFLVTEVENGGSLGSK,IYVDDGLISLQVK,GDLGIEIPAEK
Q8NF37	LPCAT1	Lysophosphatidylcholine acyltransferase 1	151	179	0.17	0.17	0.36887	0.36887	3	3	3	3	6.5	6.5	LPADTCLLEFAR,TLDTIQLAFK,AAPASSAGASDAR	LPADTCLLEFAR,TLDTIQLAFK,AAPASSAGASDAR
P08754	GNAI3	Guanine nucleotide-binding protein G(k) subunit alpha	99	112	0.17	0.17	0.31113	0.31113	3	3	3	3	7.9	7.9	AAVERSK,LLLLGAGESGK,DGGVQACFSR	AAVERSK,LLLLGAGESGK,DGGVQACFSR
O00571-2	DDX3X	ATP-dependent RNA helicase DDX3X isoform 3	154.5	229	0.14	0.17	0.23681	0.23681	5	4	5	4	9.1	7.8	QSSGASSSSFSSSR,VGNLGLATSFFNER,VGSTSENITQK,DLMACAQTGSGK,GLDISNVK	QSSGASSSSFSSSR,VGNLGLATSFFNER,VGSTSENITQK,DLMACAQTGSGK
Q08945	SSRP1	FACT complex subunit SSRP1	99	176	0.13	0.17	0.21153	0.29155	3	4	3	4	4.9	7.4	FDEISFVNFAR,ADVIQATGDAICIFR,SFDFEIETK	TGKVDNIQAGELTEGIWR,FDEISFVNFAR,ADVIQATGDAICIFR,SFDFEIETK
Q10567-2	AP1B1	Isoform B of AP-1 complex subunit beta-1	162	246	0.1	0.17	0.29908	0.44242	5	7	5	7	5.5	7.4	LSHANSAVVLSAVK,TAAVCVAK,DCPLNAEAASSK,GLEISGTFTR,EAQSICER	LSHANSAVVLSAVK,DCPLNAEAASSK,LLSTDPVAAK,NINLIVQK,GLEISGTFTR,KGEIFELK,EAQSICER
P36776-2	LONP1	lon protease homolog, mitochondrial isoform 2	160	212	0.1	0.17	0.25893	0.33352	4	6	4	6	4.9	6.9	LSSDVLTLLIK,YSNENLDLAR,ILCFYGPPGVGK,ILEFIAVSQLR	LSSDVLTLLIK,TKTENPLILIDEVDKIGR,YSNENLDLAR,ILCFYGPPGVGK,ILEFIAVSQLR,TENPLILIDEVDKIGR
P49736	MCM2	DNA replication licensing factor mcm2	165	261	0.1	0.17	0.16203	0.28439	3	5	3	5	3.9	7.8	EWTLEAGALVLADR,GLALALFGGEPK,AGIVTSLQAR	EWTLEAGALVLADR,GLALALFGGEPK,AGIVTSLQAR,ATEDGEEDEEMIESIENLEDLKGHSVR,FDILCVVR
P14324-2	FDPS	farnesyl pyrophosphate synthase isoform b	33	114	0.08	0.17	0.21153	0.77828	1	4	1	3	5	11.3	VLTEDEMGHPEIGDAIAR	VLTEDEMGHPEIGDAIAR,KQDADSLQR,LKEVLEYNAIGGK
Q96RP9	GFM1	elongation factor G, mitochondrial isoform 2	114	218	0.08	0.17	0.18351	0.40069	3	6	3	6	4.5	7.8	SFTPVFLGSALK,AIYFDGDFGQIVR,YGEIPAELR	QFVPAVEK,SFTPVFLGSALK,AIYFDGDFGQIVR,YGEIPAELR,FGQLTYVR,GIVDLIEER
P13716-2	ALAD	unnamed protein product	56	82	0.08	0.17	0.16591	0.35936	1	2	1	2	2.7	8	LAEVALAYAK	LAEVALAYAK,GSAADSEESPAIEAIHLLR
O60716-10	CTNND1	catenin delta-1 isoform 2AB	88	217	0.07	0.17	0.11588	0.3895	2	6	2	6	2.9	8.3	GYELLFQPEVVR,ALSAIADLLTNEHER	GYELLFQPEVVR,GKKPIEDPANDTVDFPKR,NLAVDAR,ALSAIADLLTNEHER,SDFQVNLNNASR,SLDNNYSTPNER
Q9H3U1-2	UNC45A	protein unc-45 homolog A isoform 3	95	294	0.06	0.17	0.089023	0.29155	2	6	2	6	3.3	7.2	LLVLYSGEDDELLQR,ALIPLALEGTDVGQTK	ALVGLCK,LLVLYSGEDDELLQR,ALIPLALEGTDVGQTK,DNALTLLIK,TESPVLTSSCR,NIGGQIQEK
P48147	PREP	prolyl endopeptidase	95	238	0.04	0.17	0.22713	0.43072	3	6	3	6	5.7	12.5	SDGTETSTNLHQK,VLYVQDSLEGEAR,VINIDFRDPEESKWK	AFVEAQNK,VIEEVSDMFAFIAR,VLYVQDSLEGEAR,LIDNFEGEYDYVTNEGTVFTFK,VFLDPNILSDDGTVALR,VINIDFRDPEESKWK
Q16186	ADRM1	proteasomal ubiquitin receptor ADRM1 isoform 1	74	69.5	0.16	0.165	0.4678	0.4949	2	3	2	3	8.8	8.1	SQSAAVTPSSTTSSTR,TSGNVEDDLIIFPDDCEFKR	VPQCPSGR,LFFWMQEPK,SQSAAVTPSSTTSSTR
P26440-2	IVD	Isoform 2 of Isovaleryl-CoA dehydrogenase, mitochondrial	36	96	0.08	0.165	0.11588	0.39786	1	5	1	5	2.2	11.7	GITAFIVEK	QYVYNVAK,TDLAAVPASR,LYEIGAGTSEVR,AFNADFH,GITAFIVEK
P0DMV8-2	HSPA1A	Isoform 2 of Heat shock 70 kDa protein 1A	540	154	0.82	0.16	1.395	0.26896	12	3	12	3	25	6.9	NQVALNPQNTVFDAK,QTQIFTTYSDNQPGVLIQVYEGER,IINEPTAAAIAYGLDR,VEIIANDQGNR,GGSGSGPTIEEVD,LVNHFVEEFKR,TTPSYVAFTDTER,DAGVIAGLNVLR,NALESYAFNMK,NQVALNPQNTVFDAKR,ARFEELCSDLFR,STLEPVEK	IINEPTAAAIAYGLDR,TTPSYVAFTDTER,DAGVIAGLNVLR
P23919-2	DTYMK	thymidylate kinase isoform 2	42	99	0.16	0.16	0.16591	0.58489	1	3	1	3	5.8	16.4	GALIVLEGVDR	TATEKPLGELWK,VLSEDAIR,GALIVLEGVDR
P52788	SMS	Spermine synthase isoform 1	67	99	0.16	0.16	0.29155	0.4678	2	3	2	3	8.7	10.9	LVEYDIDEVVYDEDSPYQNIK,MKELSQDSTGR	ADGETILK,LVEYDIDEVVYDEDSPYQNIK,MKELSQDSTGR
P13861-2	PRKAR2A	protein kinase, cAMP-dependent, regulatory, type II, alpha, isoform CRA_b	123	102	0.16	0.16	0.33352	0.33352	3	3	3	3	9.1	8.6	AASAYAVGDVK,LQEACKDILLFK,APASVLPAATPR	GTYDILVTK,LQEACKDILLFK,APASVLPAATPR
P55209-2	NAP1L1	Nucleosome assembly protein 1-like 1	93	95	0.16	0.16	0.77828	0.33352	2	1	2	1	9.5	4.6	LDGLVETPTGYIESLPR,NVDLLSDMVQEHDEPILK	LDGLVETPTGYIESLPR
Q9UNM6-2	PSMD13	26S proteasome non-ATPase regulatory subunit 13 isoform 2	73	106	0.16	0.16	0.20226	0.31826	2	3	2	3	4.7	6.8	LNIGDLQVTK,VLDLQQIK	FLGCVDIKDLPVSEQQER,VLDLQQIK,DLPVSEQQER
Q16836-2	HADH	Isoform 2 of Hydroxyacyl-coenzyme A dehydrogenase, mitochondrial	75	69	0.16	0.16	0.27427	0.27427	2	2	2	2	4.3	4.3	TFESLVDFSK,TGEGFYK	TFESLVDFSK,TGEGFYK
O75534-2	CSDE1	cold shock domain-containing protein E1 isoform 2	122	173	0.08	0.16	0.21648	0.21648	4	5	4	5	5.3	7.3	FLGTVEKEATFSNPK,LKNITLDDASAPR,NITLDDASAPR,VPSKNQNDPLPGR	LKNITLDDASAPR,VPSKNQNDPLPGR,GPDNSMGFGAER,NQNDPLPGR,ATNIEVLSNTFQFTNEAR
P78347-2	GTF2I	general transcription factor II-I isoform 4	82	212	0.06	0.16	0.14815	0.38038	5	8	3	7	3.3	9.5	EQVNDLFSRK,IIQVGNR,TPTQTNGSNVPFKPR	SPTWFGIPR,EQVNDLFSRK,IIQVGNR,TPTQTNGSNVPFKPR,TNTPVKEDWNVR,ANELPQPPVPEPANAGKR,FEAHPNDLYVEGLPENIPFR
O95782-2	AP2A1	AP-2 complex subunit alpha-1 isoform 2	74	169	0.06	0.16	0.0945	0.25325	2	5	2	5	2.1	5.5	EMGEAFAADIPR,ALLLSTYIK	EMGEAFAADIPR,ALLLSTYIK,FINLFPETK,ANHPMDAEVTK,ACNQLGQFLQHR
P08559-2	PDHA1	pyruvate dehydrogenase E1 component subunit alpha, somatic form, mitochondrial isoform 3 precursor	55	79	0.07	0.155	0.1053	0.2989	1	5	1	5	2.2	12	EILAELTGR	TREEIQEVR,AAASTDYYK,SGKGPILMELQTYR,GANQWIK,EILAELTGR
P32969	RPL9	60S ribosomal protein L9	56	78	0.33	0.15	0.58489	0.58489	2	2	2	2	9.8	9.8	KFLDGIYVSEKGTVQQADE,FLDGIYVSEK	KFLDGIYVSEKGTVQQADE,FLDGIYVSEKGTVQQADE
Q9HDC9	APMAP	Adipocyte plasma membrane-associated protein	61	105	0.15	0.15	0.27427	0.43845	2	3	2	3	4.3	7.2	GLFEVNPWK,LFSQETVMK	LLLSSETPIEGK,GLFEVNPWK,LFSQETVMK
P51570-2	GALK1	Galactokinase 1	86	136	0.15	0.15	0.27427	0.43845	2	3	2	3	5.2	7.8	EVQLEELEAAR,LAVLITNSNVR	EVQLEELEAAR,SLETSLVPLSDPK,TAQAAAALR
P46781	RPS9	40S ribosomal protein S9	45	79	0.15	0.15	0.17877	0.3895	1	2	1	2	4.6	8.7	LFEGNALLR	LFEGNALLR,SRLDQELK
Q86XP3-2	DDX42	TPA_exp: SF3b125 DEAD-box protein	81	220	0.07	0.15	0.11304	0.37891	2	6	2	6	2.8	8.4	DIPVLVATDVAAR,GVAYTLLTPK	ALQEGAEIVVCTPGR,GLDIPSIK,DIPVLVATDVAAR,ERPGLGSENMDR,TVINYDVAR,KLNIGGGGLGYR
Q99733-2	NAP1L4	Nucleosome assembly protein 1-like 4b	52	97	0.07	0.15	0.16591	0.35936	1	2	1	2	2.8	7.2	AAATAEEPDPK	LDNVPHTPSSYIETLPK,AAATAEEPDPK
O60884	DNAJA2	DnaJ homolog subfamily A member 2	52	105	0.07	0.15	0.12884	0.27427	1	2	1	2	3.1	4.8	NVLCSACSGQGGK	YGEQGLR,NVLCSACSGQGGK
Q15393	SF3B3	Splicing factor 3B subunit 3	138	309	0.05	0.15	0.092601	0.30432	3	6	3	6	2.6	5.9	FLAVGLVDNTVR,KLEDIR,TVLDPVTGDLSDTR	FLAVGLVDNTVR,QQEIVVSR,TVLDPVTGDLSDTR,NFGDQPDIR,VIVSDVQESFIWVR,FSNTGEDWYVLVGVAK
P53621-2	COPA	coatomer subunit alpha isoform 1	81	320	0.05	0.15	0.10218	0.29621	3	8	3	8	2.2	7.8	GFFEGTIASK,VWDISGLR,TLDLPIYVTR	GFFEGTIASK,VWDISGLR,TLDLPIYVTR,LLELGPKPEVAQQTR,VLTIDPTEFK,DADSITLFDVQQKR,DADSQNPDAPEGKR,GITGVDLFGTTDAVVK
Q9P2J5	LARS	Leucine--tRNA ligase, cytoplasmic	93	320	0.02	0.15	0.081181	0.36645	4	9	4	9	2.9	7.9	GIKDLSK,VFEVNASNLEK,IEKEIQQK,EVWDYVFFK	FDDPLLGPR,SFITTDVNPYYDSFVR,VFEVNASNLEK,IEKEIQQK,WQFLTLR,EVWDYVFFK,TGFFEFQAAK,ILDLQLEFDEK,VFASELNAGIIK
Q92688-2	ANP32B	PHAPI2b protein	54	75		0.15	0.77828	0.77828	2	3	2	3	8.2	12.3	KLELSENR,ELVLDNCK	NRTPAAVR,KLELSENR,ELVLDNCK
P49720	PSMB3	proteasome subunit beta type-3	63	63	0.31	0.14	0.6681	0.6681	2	2	2	2	12.6	12.6	FGPYYTEPVIAGLDPK,NCVAIAADRR	FGPYYTEPVIAGLDPK,NCVAIAADRR
P27824-2	CANX	unnamed protein product	168	116	0.24	0.14	0.5082	0.2798	9	3	9	3	16.7	6.5	IVDDWANDGWGLK,GLVLMSR,KIPNPDFFEDLEPFR,RPDADLK,VTYKAPVPTGEVYFADSFDR,CESAPGCGVWQRPVIDNPNYK,LPGDKGLVLMSR,TGIYEEK,GTLSGWILSK	KIPNPDFFEDLEPFR,APVPTGEVYFADSFDR,GTLSGWILSK
P36578	RPL4	60S ribosomal protein L4	68	62	0.22	0.14	0.3895	0.2452	3	2	3	2	12.1	7	FCIWTESAFR,IEEVPELPLVVEDKVEGYKK,QPYAVSELAGHQTSAESWGTGR	FCIWTESAFR,IEEVPELPLVVEDKVEGYKK
Q9UKK9	NUDT5	ADP-sugar pyrophosphatase	44	136	0.14	0.14	0.23285	0.87382	1	4	1	4	5	16.4	TLHYECIVLVK	KEQTADGVAVIPVLQR,TLHYECIVLVK,TTYMDPTGK,EQTADGVAVIPVLQR
P84098	RPL19	60S ribosomal protein L19	53	47	0.14	0.14	0.4678	0.4678	2	1	2	1	5.1	4.5	LLADQAEARR,LLADQAEAR	LLADQAEAR
Q9NP72	RAB18	Ras-related protein Rab-18 isoform 1	40	82	0.14	0.14	0.19378	0.4251	1	2	1	2	5.3	10.6	LAIWDTAGQER	ILIIGESGVGK,LAIWDTAGQER
P78417-2	GSTO1	glutathione S-transferase omega-1 isoform 2	36	38	0.14	0.14	0.21153	0.21153	1	1	1	1	8.6	6.7	SLGKGSAPPGPVPEGSIR	GSAPPGPVPEGSIR
P55010	EIF5	Eukaryotic translation initiation factor 5	60	88	0.14	0.14	0.20226	0.20226	2	2	2	2	4.4	4.4	VNILFDFVK,VLTLSDDLER	VNILFDFVK,VLTLSDDLER
Q9UBT2	UBA2	SUMO-activating enzyme subunit 2	82	147	0.09	0.14	0.15478	0.33352	2	4	2	4	3.9	5.7	VLVVGAGGIGCELLK,ELAEAVAGGR	QFILVMNALDNR,ESVLQFYPK,QFLFQK,ELAEAVAGGR
Q9BQ69	MACROD1	O-acetyl-ADP-ribose deacetylase MACROD1	37.5	81	0.09	0.14	0.16591	0.26264	1	2	1	2	3.3	10.4	AAGPLLTDECR	YVIHTVGPIAYGEPSASQAAELR,AAGPLLTDECR
Q9BS26	ERP44	endoplasmic reticulum resident protein 44 precursor	32	83	0.07	0.14	0.12202	0.41254	1	3	1	3	2.4	6.6	DLAEITTLDR	VDCDQHSDIAQR,ALADYIR,SDPIQEIR
Q15008-4	PSMD6	26S proteasome non-ATPase regulatory subunit 6 isoform 1	97	80	0.2	0.13	0.24961	0.24961	3	3	3	3	8.8	8.3	KGDLLLNR,PLENLEEEGLPKNPDLR,GDAAVRDELMAAVR	AEYLCR,PLENLEEEGLPKNPDLR,GDAAVRDELMAAVR
Q9BVC6	TMEM109	transmembrane protein 109 precursor	68	80	0.13	0.13	0.25893	0.58489	1	2	1	2	4.9	7.4	EAPVDVLTQIGR	QVEELR,EAPVDVLTQIGR
P19823	ITIH2	inter-alpha-trypsin inhibitor heavy chain H2 precursor	197	227	0.13	0.13	0.22168	0.28439	4	5	4	5	4.6	5.4	VQFELHYQEVK,FYNQVSTPLLR,ALYAQAR,IQPSGGTNINEALLR	VQFELHYQEVK,KLGSYEHR,FYNQVSTPLLR,ALYAQAR,IQPSGGTNINEALLR
P28838-2	LAP3	unnamed protein product	88	158	0.06	0.13	0.25893	0.4678	3	5	3	5	7.3	12.2	GITFDSGGISIK,LYGSGDQEAWQK,GVLFASGQNLAR	QLMETPANEMTPTR,LYGSGDQEAWQK,GSPNANEPPLVFVGK,GVLFASGQNLAR,FAEIIEK
Q13283	G3BP1	Ras GTPase-activating protein-binding protein 1	74	108.67	0.06	0.13	0.27427	0.39702	2	6	2	6	4.2	19.7	FYVHNDIFR,EAGEQGDIEPR	FYVHNDIFR,QYYTLLNQAPDMLHR,NSSYVHGGLDSNGKPADAVYGQK,EAGEQGDIEPR,SSSPAPADIAQTVQEDLR,FMQTFVLAPEGSVANK
P53618	COPB1	Coatomer subunit beta	71	154	0.045	0.13	0.099754	0.28727	5	10	4	8	6.4	12.1	LKEAELLEPLMPAIR,EAGELKPEEEITVGPVQK,VTVNTNMVDLNDYLQHILK,LEEEKLSQK	NVTVQPDDPISFMQLTAK,LKEAELLEPLMPAIR,EAGELKPEEEITVGPVQK,EAADPLASK,VTVNTNMVDLNDYLQHILK,VLSTPDLEVR,AAAQCYIDLIIKESDNNVK,TLHSCSVR
Q99873-2	PRMT1	protein arginine N-methyltransferase 1-variant 3	60	56.5	0.08	0.125	0.25893	0.25893	2	3	2	3	8.6	11.5	TGEEIFGTIGMRPNAK,DKWLAPDGLIFPDR	ATLYVTAIEDR,DVAIKEPLVDVVDPK,DKWLAPDGLIFPDR
Q9Y3F4-2	STRAP	unnamed protein product	44	79.5		0.125	0.2452	0.3332	2	4	2	4	6.3	13.7	CVLPEEDSGELAKPK,LWQTVVGK	IYDLNKPEAEPK,QGDTGDWIGTFLGHK,CVLPEEDSGELAKPK,LWQTVVGK
P07477	PRSS1	trypsin-1 preproprotein	125	143	0.21333	0.12	0.83021	1.1544	3	3	3	3	15.3	15.3	TLNNDIMLIK,LGEHNIEVLEGNEQFINAAK,NKPGVYTK	TLNNDIMLIK,LGEHNIEVLEGNEQFINAAK,NKPGVYTK
P25685-2	DNAJB1	dnaJ homolog subfamily B member 1 isoform 2	60	36	0.19	0.12	0.24415	0.15478	3	1	3	1	18.3	4.1	EALCGCTVNVPTLDGR,DGSDVIYPAR,EGDQTSNNIPADIVFVLK	DGSDVIYPAR
Q15392-2	DHCR24	unnamed protein product	66	91	0.12	0.12	0.27427	0.27427	2	2	2	2	3.5	3.5	EGLEYIPLR,LTQGETLR	EGLEYIPLR,LTQGETLR
P48163-2	ME1	unnamed protein product	63	81	0.12	0.12	0.2452	0.2452	2	2	2	2	4.2	4.2	AECSAEQCYK,TATVYPEPQNK	AECSAEQCYK,TATVYPEPQNK
Q9UBF2-2	COPG2	coatomer subunit gamma-2 isoform 2	109	108	0.12	0.12	0.21153	0.21153	3	3	3	3	3.7	3.7	AAAVSALAK,IFNETPINPR,SAVLQEAR	AAAVSALAK,IFNETPINPR,SAVLQEAR
P53041	PPP5C	serine/threonine-protein phosphatase 5 isoform 1	98	99	0.12	0.12	0.18597	0.18597	2	2	2	2	4.8	4.8	AALRDYETVVK,AFLEENNLDYIIR	AALRDYETVVK,AFLEENNLDYIIR
Q1KMD3	HNRNPUL2	heterogeneous nuclear ribonucleoprotein U-like protein 2	98	160	0.08	0.12	0.12884	0.19935	2	3	2	3	2.8	6	LVQIASR,YNVLGAETVLNQMR	VGWSVDFSRPQLGEDEFSYGFDGR,LVQIASR,YNVLGAETVLNQMR
Q9UBM7	DHCR7	7-dehydrocholesterol reductase	54	72	0.06	0.12	0.4251	0.4251	2	2	2	2	3.5	3.5	YTAAVPYR,SLDGVTNDR	YTAAVPYR,SLDGVTNDR
O94874-3	UFL1	KIAA0776, isoform CRA_b	35	135	0.06	0.12	0.079775	0.35936	1	4	1	4	1.7	7.2	AQFAEATQR	GVIFTEAFVAR,LAADFQR,AQFAEATQR,AVFVPDIYSR
Q13547	HDAC1	histone deacetylase 1	48	78	0.06	0.12	0.1053	0.35031	1	3	1	3	2.4	6.2	YGEYFPGTGDLR	LFENLR,SIRPDNMSEYSK,YGEYFPGTGDLR
P21281	ATP6V1B2	V-type proton ATPase subunit B, brain isoform	44	97	0.06	0.12	0.10069	0.21153	1	2	1	2	2.9	4.8	AVVQVFEGTSGIDAK	TPVSEDMLGR,AVVQVFEGTSGIDAK
Q9Y3I0	C22orf28,RTCB	tRNA-splicing ligase RtcB homolog	48	60	0.06	0.12	0.19378	0.19378	2	2	2	2	3.9	5.9	SYNDELQFLEK,LADMGIAIR	GLGHQVATDALVAMEK,QIGNVAALPGIVHR
P11498-2	PC	unnamed protein product	34	74	0.06	0.12	0.077105	0.16016	1	2	1	2	2.2	4.7	TSTAPAASPNVR	TSTAPAASPNVR,ADFAQACQDAGVR
P02788-2	LTF	lactotransferrin isoform 2	223	108	0.24	0.115	0.55052	0.21563	9	6	7	4	14.2	9.1	DLLFKDSAIGFSR,LCAGTGENK,SCHTAVDR,YYGYTGAFR,CLAENAGDVAFVKDVTVLQNTDGNNNEAWAK,CGLVPVLAENYK,GGSFQLNELQGLK	LCAGTGENK,YYGYTGAFR,CGLVPVLAENYK,CLAENAGDVAFVKDVTVLQNTDGNNNEAWAK
Q14247-2	CTTN	src substrate cortactin isoform c	40	77.5	0.05	0.115	0.072267	0.1913	1	3	1	3	1.2	4.7	ANFENLAK	VDKSAVGFEYQGK,HCSQVDSVR,ANFENLAK
O43760-2	SYNGR2	SYNGR2 protein	61	101	0.11	0.11	0.35936	0.35936	2	2	2	2	6.9	6.5	FLTQPQVVAR,AGGSFDLRR	FLTQPQVVAR,AGGSFDLR
O75323-2	GBAS	protein NipSnap homolog 2 isoform 2	62	49	0.11	0.11	0.35936	0.16591	2	1	2	1	8	3.6	IMIPLKTSPLQ,SGPNIYELR	SGPNIYELR
P0C7P4	UQCRFS1P1	Putative cytochrome b-c1 complex subunit Rieske-like protein 1	57	53	0.11	0.11	0.16591	0.16591	2	2	2	2	3.1	3.1	LEVLDSTK,RLEVLDSTK	LEVLDSTK,RLEVLDSTK
Q15459	SF3A1	splicing factor 3A subunit 1	57	234	0.08	0.11	0.12884	0.52831	2	7	2	7	4.5	10	VMQQQQQTTQQQLPQK,TQQAAQANITLQEQIEAIHK	IGEEEIQKPEEK,ILIQER,VQAQVIQETIVPK,LTAQFVAR,VMQQQQQTTQQQLPQK,AQEPSAAIPK,RTDIFGVEETAIGKK
P23921	RRM1	Ribonucleoside-diphosphate reductase large subunit	71	162	0.07	0.11	0.12534	0.19378	2	4	2	4	2.9	6.5	SNQQNLGTIK,SAGGIGVAVSCIR	SAGGIGVAVSCIR,VSKEEEEKER,TRPAANPIQFTLNK,EQGPYETYEGSPVSK
O95757	HSPA4L	Heat shock 70 kDa protein 4L	155	175	0.07	0.11	0.21957	0.1721	5	4	5	4	5.8	6	LYQECEK,MIMQDKLEK,IRLPYELQK,DISTTLNADEAVAR,AVMEQANLQR	LYQECEK,MIMQDKLEK,DISTTLNADEAVAR,EPFELEAFYTNLHEVPYPDAR
Q14498-2	RBM39	RNA-binding protein 39 isoform b	34	79	0.06	0.11	0.10069	0.21153	1	2	1	2	2.8	4.7	VLGVPIIVQASQAEK	NSAQGNVYVK,VLGVPIIVQASQAEK
O15355	PPM1G	Protein phosphatase 1G	58	109.5	0.05	0.11	0.11034	0.23961	1	3	1	3	2.1	6.4	ALEDAFLAIDAK	AYTGFSSNSER,ALEDAFLAIDAK,ETPSQENGPTAK
P51114-2	FXR1	fragile X mental retardation syndrome-related protein 1 isoform b	43	78	0.05	0.11	0.079775	0.16591	1	2	1	2	3.3	4.8	KVPGVTAIELDEDTGTFR	KVPGVTAIELDEDTGTFR,LQIDEQLR
E9PAV3-2	NACA	nascent polypeptide-associated complex subunit alpha isoform a	78	289	0.03	0.11	0.11588	0.2452	1	4	1	4	1.6	3.3	IEDLSQQAQLAAAEK	SPASDTYIVFGEAKIEDLSQQAQLAAAEK,IEDLSQQAQLAAAEK,IEDLSQQAQLAAAEKFK,SPASDTYIVFGEAK
Q04637-3	EIF4G1	Isoform B of Eukaryotic translation initiation factor 4 gamma 1	64	248.5		0.11	0.1086	0.28401	3	11	3	11	3.4	10.2	GSSGGSGAKPSDAASEAARPATSTLNR,GGPPGPPISR,FSALQQAVPTESTDNRR	AASLTEDRDR,EAVGDLLDAFK,LLTTIGKDLDFEK,GLPLVDDGGWNTVPISK,SDQWKPLNLEEK,GSSGGSGAKPSDAASEAARPATSTLNR,VPTTEKPTVTVNFR,ITKPGSIDSNNQLFAPGGR,GGPPGPPISR,FMLQDVLDLR,FSALQQAVPTESTDNRR
Q92499-2	DDX1	unnamed protein product	75	134	0.1	0.1	0.19935	0.27427	2	4	2	4	4.8	9.9	ALIVEPSRELAEQTLNNIK,ELLIIGGVAAR	GIDIHGVPYVINVTLPDEK,TKIDCDNLEQYFIQQGGGPDKK,ELLIIGGVAAR,FLICTDVAAR
Q9NVI7-2	ATAD3A	ATPase family AAA domain-containing protein 3A isoform 2	85	106	0.05	0.1	0.19378	0.26638	3	4	3	4	4.2	9.2	ITVLEALR,AQYQDKLAR,NATLVAGR	ITVLEALR,LLSRPQDALEGVVLSPSLEAR,NATLVAGR,LKEYEAAVEQLKSEQIR
P09960-4	LTA4H	leukotriene A-4 hydrolase isoform 2	33	90	0.05	0.1	0.070069	0.22528	1	3	1	3	1.7	6.6	WEDAIPLALK	DGETPDPEDPSR,TWDHFWLNEGHTVYLER,WEDAIPLALK
O75363-2	BCAS1	Isoform 2 of Breast carcinoma-amplified sequence 1	54	161	0.05	0.1	0.06605	0.21153	1	3	1	3	2.1	6	ANFTSQETQGAGK	TGDQAADSSLGSVK,DSSFFDKFFK,ANFTSQETQGAGK
Q08211	DHX9	Atp-dependent rna helicase a	92	190	0.05	0.1	0.11588	0.20051	3	5	3	5	2.2	3.7	MGGEEAEIR,ILTTEGR,AAECNIVVTQPR	DFVNYLVR,TPLHEIALSIK,LNQYFQK,AAECNIVVTQPR,ISAVSVAER
Q07065	CKAP4	Cytoskeleton-associated protein 4	42	70	0.05	0.1	0.056354	0.11588	1	2	1	2	2.1	5.1	GAHPSGGADDVAK	GAHPSGGADDVAK,SLGETQLVLYGDVEELKR
O75400-2	PRPF40A	pre-mRNA-processing factor 40 homolog A	41	95	0.03	0.1	0.070069	0.22528	1	3	1	3	1.7	3.8	FVKEPAFEDITLESER	TLLEQLDDDQ,STTLDAGNIK,FVKEPAFEDITLESER
P26640	VARS	Valine--tRNA ligase	48	192	0.02	0.1	0.039798	0.26385	1	6	1	6	1.1	6	SSAQDPQAVLGALGR	ITPAHDQNDYEVGQR,IQQQQPPPGEK,SSAQDPQAVLGALGR,DVSGPMPDSYSPR,DINLDVNR,IETMLGDVAVAVHPK
Q13155	AIMP2	aminoacyl tRNA synthase complex-interacting multifunctional protein 2	86	98	0.19	0.09	0.31113	0.31113	2	2	2	2	11.8	10.3	SYGPAPGAGHVQEESNLSLQALESR,SCENLAPFNTALK	SYGPAPGAGHVQEESNLSLQALESR,AAVDGLSK
Q13247-3	SRSF6	Isoform SRP55-3 of Serine/arginine-rich splicing factor 6	59	58	0.09	0.09	0.27427	0.27427	2	2	2	2	6.2	6.2	QAGEVTYADAHKER,LIEDKPR	LLEVDLK,QAGEVTYADAHKER
P02649	APOE	apolipoprotein E isoform b precursor	42.5	64	0.09	0.09	0.1053	0.22168	1	2	1	2	2.8	5.6	LGPLVEQGR	LAVYQAGAR,LGPLVEQGR
P13807-2	GYS1	glycogen [starch] synthase, muscle isoform 2	96	103	0.09	0.09	0.14062	0.14062	2	2	2	2	3.4	3.4	LSDLLDWK,TQVELLEAPTPALKR	LSDLLDWK,TQVELLEAPTPALKR
Q5JWF2-2	GNAS	Isoform XLas-2 of Guanine nucleotide-binding protein G(s) subunit alpha isoforms XLas	99	113	0.06	0.09	0.1721	0.26896	2	3	2	3	2.6	3.6	YTTPEDATPEPGEDPR,LLLLGAGESGK	YTTPEDATPEPGEDPR,LLLLGAGESGK,VLTSGIFETK
Q96EK5	KIAA1279,KIF1BP	KIF1-binding protein	46	86	0.05	0.09	0.079775	0.16591	1	2	1	2	3.3	5.3	ISATEDTPEAEGEVPELYHQR	EVGSPPLDPTER,ISATEDTPEAEGEVPELYHQR
Q9P2T1-2	GMPR2	GMP reductase 2 isoform 1	84	50	0.17	0.08	0.43845	0.12884	3	1	3	1	7.1	2.7	YAGGVAEYR,SEVDLTR,STCTYVGAAK	STCTYVGAAK
P55036	PSMD4	26S proteasome non-ATPase regulatory subunit 4	50	87	0.08	0.08	0.17877	0.3895	1	2	1	2	3.1	5	NAMGSLASQATK	NAMGSLASQATK,VSMEEQR
P48637-2	GSS	glutathione synthetase	59	88	0.08	0.08	0.11588	0.2452	1	2	1	2	2.4	5.2	ALAEGVLLR	ALAEGVLLR,QYSLQNWEAR
P33992	MCM5	DNA replication licensing factor mcm5	59	99	0.08	0.08	0.12202	0.1885	2	3	2	3	3.5	5.3	VLGIQVDTDGSGR,LAALPNVYEVISK	LQELPDAVPHGEMPR,AIACLLFGGSR,LAALPNVYEVISK
Q96TA1-2	FAM129B	niban-like protein 1 isoform 2	95	89.5	0.08	0.08	0.22528	0.14767	3	3	3	3	5	4.6	FSLVPHNYGLVLYENK,FQELIFEDFAR,FDVSSTSVFK	VQQVQPAMQAVIR,FQELIFEDFAR,FDVSSTSVFK
Q9Y5P6-2	GMPPB	GDP-mannose pyrophosphorylase B, isoform CRA_a	38	36	0.08	0.08	0.14505	0.14505	1	1	1	1	5.1	4.6	ISMSHEEEPLGTAGPLALAR	LCSGPGIVGNVLVDPSAR
Q9NYK5-2	MRPL39	PREDICTED: 39S ribosomal protein L39, mitochondrial isoform X2	53	56	0.08	0.08	0.23285	0.11034	2	1	2	1	6.2	4.2	IGDFIDVSEGPLIPR,QLSLTPR	IGDFIDVSEGPLIPR
P01023	A2M	alpha-2-macroglobulin	127.5	214	0.05	0.08	0.11122	0.14736	5	4	5	4	3.3	2.5	ATVLNYLPK,GPTQEFK,LPPNVVEESAR,MVSGFIPLKPTVK,QTVSWAVTPK	ATVLNYLPK,GPTQEFK,LPPNVVEESAR,QTVSWAVTPK
Q9NUQ8-2	ABCF3	ATP-binding cassette, sub-family F (GCN20), member 3, isoform CRA_b	39	66	0.04	0.08	0.064209	0.13254	1	2	1	2	1.4	2.7	LLLGDLAPVR	QHIQVFIDR,LLLGDLAPVR
P42224-2	STAT1	signal transducer and activator of transcription 1-alpha/beta isoform beta	60	122	0.04	0.08	0.059254	0.12202	1	2	1	2	1.6	3.2	ELSAVTFPDIIR	ELSAVTFPDIIR,EGAITFTWVER
Q9NY33-4	DPP3	dipeptidyl peptidase 3 isoform 2	45	132		0.08	0.12534	0.26638	2	4	2	4	3.5	5.5	VVEQLEK,DPFGSRGEFEGFVAVVNK	LLSPTER,VVEQLEK,LASVLGSEPSLDSEVTSK,DTVLLRK
P35527	KRT9	Keratin, type I cytoskeletal 9	522.5	60.333	0.73	0.07	1.1116	0.12134	16	3	15	2	28.8	2.5	FSSSGGGGGGGR,HGVQELEIELQSQLSK,SGGGGGGGLGSGGSIR,IGLGGRGGSGGSYGR,SGGGGGGGLGSGGSIRSSYSR,HGVQELEIELQSQLSKK,MTLDDFR,TLLDIDNTR,LASYLDK,GGSGGSYGRGSR,GGSGGSYGGGGSGGGYGGGSGSR,TLNDMRQEYEQLIAK,FSSSSGYGGGSSR,DIENQYETQITQIEHEVSSSGQEVQSSAK,STMQELNSR	STMQELNSR,LASYLDK
P39023	RPL3	60S ribosomal protein L3 isoform a	124	86	0.15	0.07	0.25893	0.25893	2	2	2	2	9.4	4.7	ERLEQQVPVNQVFGQDEMIDVIGVTK,NNASTDYDLSDK	FQTMEEK,NNASTDYDLSDK
P43686	PSMC4	26S protease regulatory subunit 6B isoform 1	39	58	0.07	0.07	0.11034	0.23285	1	2	1	2	4.7	6.9	LQQELEFLEVQEEYIKDEQK	LIFSTITSK,LQQELEFLEVQEEYIKDEQK
P49321-2	NASP	Nuclear autoantigenic sperm protein isoform 3	39	48.5	0.07	0.07	0.11034	0.17159	1	3	1	3	1.7	5.5	SIEVIENR	SGNVAELALK,SLLELAR,SIEVIENR
Q7Z2K6	ERMP1	Endoplasmic reticulum metallopeptidase 1	101	102	0.07	0.07	0.14976	0.14976	2	2	2	2	2.3	2.3	EGAAAAPPPER,AGDNILAVLK	EGAAAAPPPER,AGDNILAVLK
Q8N1F7	NUP93	nuclear pore complex protein Nup93 isoform 1	78	127	0.07	0.07	0.092601	0.14207	2	3	2	3	2.3	3.6	NLQEIQQAGER,ASVLLGSR	NLQEIQQAGER,ASVLLGSR,LKNMALSIAER
O15397-2	IPO8	importin-8 isoform 2	72	89	0.03	0.07	0.13646	0.13646	2	3	2	2	2.1	2.1	NAVELAKK,LLEVIILQCK	NAVELAKK,LLEVIILQCK
Q9H0D6-2	XRN2	Isoform 2 of 5'-3' exoribonuclease 2	63	113	0.03	0.07	0.05133	0.1053	2	2	2	2	2.1	2.1	NSPGSQVASNPR,MNQQRSR	NSPGSQVASNPR,DCEGLPR
Q13620-1	CUL4B	cullin-4B isoform 2	89	101	0.06	0.065	0.15742	0.13817	3	6	3	6	4.1	6.2	LEEEADRLITYLDQTTQK,TLQSLACGK,QYQIDAAIVR	LEEEADRLITYLDQTTQK,TLQSLACGK,LQEIFK,QMIMIR,FLEETNR,QYQIDAAIVR
Q96P70	IPO9	Importin-9	122	94	0.12	0.06	0.28265	0.20526	4	3	4	3	4.1	3.2	VKGEEIYSMDEGIR,IFTMAEVYGIR,WTNIPLLVK,HLQEAEQTK	VKGEEIYSMDEGIR,IFTMAEVYGIR,WTNIPLLVK
O95202	LETM1	LETM1 and EF-hand domain-containing protein 1, mitochondrial precursor	98	88.5	0.08	0.06	0.11304	0.084025	2	2	2	2	3.2	2.7	FLQDTIEEMALK,VAEVEGEQVDNK	VAEVEGEQVDNK,DFSVFFQK
Q01650	SLC7A5	large neutral amino acids transporter small subunit 1	33	80	0.06	0.06	0.21153	0.4678	1	2	1	2	3.1	6.7	ALAAPAAEEKEEAREK	ALAAPAAEEKEEAREK,SADGSAPAGEGEGVTLQR
Q06265-2	EXOSC9	exosome complex component RRP45 isoform 1	42	77	0.06	0.06	0.14505	0.31113	1	2	1	2	2.1	3.7	VAEITELILK	ALENDQK,VAEITELILK
P11166	SLC2A1	Solute carrier family 2, facilitated glucose transporter member 1	36	33	0.06	0.06	0.25893	0.25893	1	1	1	1	2	3.4	TFDEIASGFR	GTADVTHDLQEMKEESR
P11142-2	HSPA8	heat shock cognate 71 kDa protein isoform 2	37	63	0.06	0.06	0.1053	0.22168	1	2	1	2	2	4.6	VQVEYKGETK	VQVEYKGETK,TTPSYVAFTDTER
Q3LXA3	TKFC,DAK	Bifunctional ATP-dependent dihydroxyacetone kinase/FAD-AMP lyase (Cyclizing)	57	65	0.06	0.06	0.085711	0.17877	1	2	1	2	2	4	SPGADLLQVLTK	LEQPDPGAVAAAAILR,LNFGLAR
P30613-2	PKLR	pyruvate kinase PKLR isoform 2	75	57	0.06	0.06	0.15478	0.15478	2	2	2	2	3.4	3.4	GDLGIEIPAEK,ASDVAAVR	GDLGIEIPAEK,ASDVAAVR
Q8N371-3	KDM8	lysine-specific demethylase 8 isoform 1	54	51	0.06	0.06	0.092601	0.092601	2	2	2	2	3	3	ALLPHSK,LEKTVPR	ALLPHSK,LEKTVPR
Q9UHB6-2	LIMA1	unnamed protein product	34	82	0.05	0.05	0.064209	0.20526	1	3	1	3	1.8	5.6	VGVLAASMEAK	VGVLAASMEAK,ASSLSESSPPK,QSSSTNYTNELK
P17812	CTPS1	CTP synthase 1 isoform a	35	56	0.05	0.05	0.079775	0.16591	1	2	1	2	2	3.3	GLGLSPDLVVCR	IQAIAWAR,GLGLSPDLVVCR
P02771	AFP	alpha-fetoprotein precursor	72	68	0.05	0.05	0.14505	0.14505	2	2	2	2	2.4	2.4	GYQELLEK,SCGLFQK	GYQELLEK,SCGLFQK
Q9BSJ8-2	ESYT1	extended synaptotagmin-1 isoform 1	44	119	0.03	0.05	0.04914	0.10069	1	2	1	2	1	2.4	QLLDDEEQLTAK	QLLDDEEQLTAK,AVYSTNCPVWEEAFR
Q15061	WDR43	WD repeat-containing protein 43	55	63	0.04	0.04	0.077105	0.16016	1	2	1	2	1.6	2.6	SGGNEVSIEER	VETAITK,SGGNEVSIEER
Q14978-2	NOLC1	nucleolar and coiled-body phosphoprotein 1 isoform 1	73	54	0.04	0.04	0.19378	0.12534	3	2	3	2	4.6	3.5	VAGGAAPSKPASAK,AALSLPAK,VREEEIEVDSR	VAGGAAPSKPASAK,VREEEIEVDSR
Q5TZA2-2	CROCC	ciliary rootlet coiled-coil, rootletin, isoform CRA_b	59.5	110	0.03	0.04	0.042072	0.085711	2	4	2	4	1.4	2.4	LALLEEAR,QMKMLDSENTR	LALLEEAR,QMKMLDSENTR,ELQELR,LEQEVAR
Q9C0C2	TNKS1BP1	182 kDa tankyrase-1-binding protein	42	147	0.02	0.04	0.031177	0.096478	1	3	1	3	0.6	2.4	FAATTVEEILAK	ESGVGQTDWSGVEAGEFLK,WSDQGPAQTSR,FAATTVEEILAK
P49747-2	COMP	unnamed protein product	55	38		0.04	0.17877	0.085711	2	1	2	1	2.8	1.4	AVAEPGIQLK,SSTGPGEQLR	SSTGPGEQLR
P53396-2	ACLY	ATP-citrate synthase isoform 2	1242	49	1.35	0.03	2.0392	0.082637	35	2	28	2	30.7	2.2	AIVWGMQTR,TASFSESRADEVAPAKK,QHFPATPLLDYALEVEK,EGDYVLFHHEGGVDVGDVDAK,AFDSGIIPMEFVNK,SGGMSNELNNIISR,SAYDSTMETMNYAQIR,DGVYVLDLAAK,TIAIIAEGIPEALTR,EAYPEEAYIADLDAK,FICTTSAIQNR,RGGPNYQEGLR,IGNTGGMLDNILASK,YQDTPGVK,LLVGVDEK,HPWDDISYVLPEHMSM,STTLFSR,VDATADYICK,WGDIEFPPPFGR,TILSLMTR,LGQEATVGK,LLVGVDEKLNPEDIKK,LTLLNPK,VQILKDYVR,SINNPDMR,GGPNYQEGLR,LYRPGSVAYVSR,TTDGVYEGVAIGGDRYPGSTFMDHVLR	QHFPATPLLDYALEVEK,SINNPDMR
Q9Y4C2-2	FAM115A,TCAF1	unknown	40	53	0.03	0.03		0.060818	1	2	1	2	0.7	1.7	VSKKMPK	LGAEPFPLR,VSKKMPK
P41252	IARS	isoleucine--tRNA ligase, cytoplasmic	55	71	0.02	0.02	0.038469	0.078417	2	3	2	3	1.3	2.3	LYLINSPVVR,SIIRTLK	LYLINSPVVR,NNDLCYWVPELVR,SIIRTLK
P01024	C3	complement C3 precursor	74	49	0.02	0.02	0.035211	0.047129	4	2	4	2	1.7	1.8	GYTQQLAFR,KGYTQQLAFR,GVFVLNK,EVVADSVWVDVK	KGYTQQLAFR,ILLQGTPVAQMTEDAVDAER
Q9P2K8-2	EIF2AK4	Isoform 2 of Eukaryotic translation initiation factor 2-alpha kinase 4	53.333	33	0.02	0.02	0.053341	0.031605	3	1	3	1	2	0.6	QKTGIAQLVK,NAKGLSNESVNLLK,FSDNALPYK	QKTGIAQLVK
Q9P212-2	PLCE1	1-phosphatidylinositol 4,5-bisphosphate phosphodiesterase epsilon-1 isoform 2	58	35	0.01	0.01	0.053725	0.026511	2	1	2	1	1	0.6	ISVGPCLK,LKEQVQASREDK	LKEQVQASREDK
Q8WZ42-10	TTN	titin isoform novex-1	50	116	0	0	0.0027895	0.0071893	6	10	6	10	0.1	0.3	ANDTLVR,RMLILK,LEMKVR,KGQVLSTSAR,NAVGVSLPR,SAANLIVEEEDLR	ANDTLVR,TVLISSEGK,VKGLTNK,AWVSVTNNCNRLSYK,AESCEFTVTGLQKGGVEYLFR,RMLILK,KTPSPIEAERR,LEMKVR,NAVGVSLPR,VNKTPIADLK
Q8TE68-2	EPS8L1	epidermal growth factor receptor kinase substrate 8-like protein 1 isoform b	33	50	0.05		0.072267	0.14976	1	2	1	2	1.6	2.6	AAGEGLLTLR	YAFSLLAR,AVISTVER
Q6DHV7-2	ADAL	adenosine deaminase-like protein isoform 2	44	50			0.17877	0.17877	2	2	2	2	5.9	5.9	YLELRSTPR,YLIAVDR	YLELRSTPR,YLIAVDR
Q92900-2	UPF1	regulator of nonsense transcripts 1 isoform 2	46	64			0.082637	0.12648	2	3	2	3	1.5	3.1	IPSEQEQLR,IAYFTLPK	IPSEQEQLR,AGAKPDQIGIITPYEGQR,IAYFTLPK
Q6BDS2	UHRF1BP1	UHRF1-binding protein 1	45	83			0.072267	0.11034	2	3	2	3	1.3	1.7	SSCMVVR,LMGGAMQLTFRK	SSCMVVR,LLQEIR,LMGGAMQLTFRK
Q8NI35-2	INADL	Isoform 2 of InaD-like protein	54	52			0.065117	0.065117	2	3	2	2	1.4	1.4	LQVLQVLDR,IDTLKNDNIQALEK	LQVLQVLDR,IDTLKNDNIQALEK
Q9Y6V0-2	PCLO	Isoform 2 of Protein piccolo	50	73			0.022607	0.022607	2	3	2	3	0.5	0.7	EQEKQREIEQQQR,SALQDEADKPYSSGSR	SISSQQPEKIK,SALQDEADKPYSSGSR,VDAKVEIIK
Q8WXH0-2	SYNE2	Nesprin-2 isoform 5	60	89			0.016464	0.016464	3	4	3	4	0.4	0.4	GDVDGLVR,AIDLQIK,DFQQQQVLELKPMEQK	GDVDGLVR,AIDLQIK,IQEAKEK,QILSLNQR
Q9UPN3	MACF1	Microtubule-actin cross-linking factor 1, isoforms 1/2/3/5	35	57			0.010545	0.01586	2	3	2	3	0.2	0.4	NPNIDALKVINK,SELNLLVEK	NPNIDALKVINK,LQDELVTLR,LLHFQNAVEIEK
Q9UQ35-2	SRRM2	serine/arginine repetitive matrix 2, isoform CRA_b	52	42					2	2	2	2	0.6	0.6	SRTRSPVR,RGQRGDSR	SRTRSPVR,RGQRGDSR
P63261	ACTG1	Actin, cytoplasmic 2		1799		79.36		6.7426	0	48	0	31	0	78.9		AGFAGDDAPR,LCYVALDFEQEMATAASSSSLEK,CPEALFQPSFLGMESCGIHETTFNSIMK,IWHHTFYNELR,YPIEHGIVTNWDDMEK,SYELPDGQVITIGNERFR,QEYDESGPSIVHR,SYELPDGQVITIGNER,IIAPPER,HQGVMVGMGQKDSYVGDEAQSK,CDVDIR,TTGIVMDSGDGVTHTVPIYEGYALPHAILR,KDLYANTVLSGGTTMYPGIADR,IKIIAPPERK,QEYDESGPSIVHRK,MQKEITALAPSTMK,GYSFTTTAER,LDLAGRDLTDYLMK,DSYVGDEAQSK,DLYANTVLSGGTTMYPGIADR,RGILTLK,CDVDIRK,HQGVMVGMGQK,EITALAPSTMK,IIAPPERK,DSYVGDEAQSKR,E…
P06899	HIST1H2BJ	Histone H2B type 1-J		502		32.68		4.6234	0	13	0	11	0	69.8		AMGIMNSFVNDIFER,STITSREIQTAVR,HAVSEGTKAVTK,ESYSIYVYK,HAVSEGTK,QVHPDTGISSK,VLKQVHPDTGISSK,LLLPGELAK,AVTKYTSAK,PEPAKSAPAPK,EIQTAVR
Q8N257	HIST3H2BB	Histone H2B type 3-B		401		16.42		3.217	0	11	0	9	0	59.5		AMGIMNSFVNDIFER,AVTKYTSSK,HAVSEGTKAVTK,QVHPDTGISSK,PDPSKSAPAPK,ESYSIYVYK,HAVSEGTK,VLKQVHPDTGISSK,LLLPGELAK
P68032	ACTC1	actin, alpha cardiac muscle 1 proprotein		824		6.07		2.1623	0	24	0	17	0	32.3		AGFAGDDAPR,RGILTLK,IWHHTFYNELR,SYELPDGQVITIGNERFR,YPIEHGIITNWDDMEK,SYELPDGQVITIGNER,IIAPPER,HQGVMVGMGQK,HQGVMVGMGQKDSYVGDEAQSK,EITALAPSTMK,IIAPPERK,DSYVGDEAQSKR,IKIIAPPERK,DLTDYLMK,MQKEITALAPSTMK,LDLAGRDLTDYLMK,DSYVGDEAQSK
P22392	NME2,NME1-NME2	nucleoside diphosphate kinase B isoform a		405		6.03		2.8312	0	10	0	9	0	57.8		GDFCIQVGR,VMLGETNPADSKPGTIR,TFIAIKPDGVQR,SAEKEISLWFKPEELVDYK,NIIHGSDSVK,GLVGEIIKR,SCAHDWVYE,TGRVMLGETNPADSKPGTIR,GLVGEIIK
Q9HB71	CACYBP	calcyclin-binding protein isoform 1		421		4.32		2.7276	0	13	0	10	0	47.3		KIYEDGDDDMKR,TINKAWVESR,SKIETEIKNK,SFDLLVK,TDTVLILCR,ISNYGWDQSDKFVK,IYEDGDDDMKR,KAELLDNEKPAAVVAPITTGYTVK,EKPSYDTETDPSEGLMNVLK,VKTDTVLILCR
P08133	ANXA6	annexin A6 isoform 1		1684		4.18		4.7659	0	41	0	39	0	64.7		WGTDEAQFIYILGNR,ALLALCGGED,GLGTDEDTIIDIITHR,LVFDEYLK,SELDMLDIREIFR,LIVGLMRPPAYCDAK,QRQEVCQSYK,ILISLATGHREEGGENLDQAR,CLIEILASR,RVFQEFIK,STPEYFAER,SLEDALSSDTSGHFRR,AMEGAGTDEKALIEILATR,TNEQMHQLVAAYK,GAGTDEKTLTR,EDAQVAAEILEIADTPSGDKTSLETR,SLHQAIEGDTSGDFLK,LILGLMMPPAHYDAK,SEIDLLNIRR,DAYERDLEADIIGDTSGHFQK,SELDMLDIR,SEIDLLNIR,VFQEFIK,SLEDALSSDTSGHFR,DAFVAIVQSVK,NKPLFFADKLYK,SEISGDLAR,VELKGTVRPANDFNPDADA…
P53396	ACLY	ATP-citrate synthase isoform 1		1820		2.57		3.1753	0	44	0	36	0	39.2		AIVWGMQTR,TASFSESRADEVAPAKK,QHFPATPLLDYALEVEK,EGDYVLFHHEGGVDVGDVDAK,AFDSGIIPMEFVNK,AKPAMPQDSVPSPR,AISEQTGKELLYK,SGGMSNELNNIISR,SAYDSTMETMNYAQIR,DGVYVLDLAAK,LKQGLYR,EAYPEEAYIADLDAK,TIAIIAEGIPEALTR,FICTTSAIQNR,RGGPNYQEGLR,IGNTGGMLDNILASK,HPWDDISYVLPEHMSM,LLVGVDEK,YQDTPGVK,STTLFSR,VDATADYICK,WGDIEFPPPFGR,DYQGPLKEHEVTIFVR,TILSLMTR,LGQEATVGK,VTPDTDWAR,NQALKEAGVFVPR,MIVVLGEIGGTEEYKICR,FGGALDAAAK,LTLLNP…
O75223	GGCT	gamma-glutamylcyclotransferase isoform 1		225		2.24		2.1623	0	9	0	7	0	37.7		LQDFKLDFGNSQGK,VSEEIEDIIKKGETQTL,VSEEIEDIIK,VATQEGKEITCR,IICMGAKENGLPLEYQEK,AIEPNDYTGK,ENGLPLEYQEK
P63000-2	RAC1	ras-related C3 botulinum toxin substrate 1 isoform Rac1b		292		1.86		2.5938	0	7	0	7	0	26		GLKTVFDEAIR,LTPITYPQGLAMAK,CVVVGDGAVGK,AKWYPEVR,TVFDEAIR,YLECSALTQR,KLTPITYPQGLAMAK
P12532	CKMT1A,CKMT1B	creatine kinase U-type, mitochondrial precursor		671		1.74		1.565	0	17	0	14	0	41.4		SFLIWVNEEDHTR,VVVDALSGLKGDLAGR,RGTGGVDTAATGGVFDISNLDR,SGYFDER,GLKEVER,LYPPSAEYPDLR,LSEMTEAEQQQLIDDHFLFDKPVSPLLTAAGMAR,HTTDLDASK,TTPTGWTLDQCIQTGVDNPGHPFIK,GTGGVDTAATGGVFDISNLDR,LGYILTCPSNLGTGLR,GWEFMWNER,VVVDALSGLK,TMKHTTDLDASK
Q71DI3	HIST2H3A,HIST2H3C,HIST2H3D	histone H3.2		209		1.7		2.9811	0	6	0	6	0	25		YQKSTELLIR,EIAQDFKTDLR,EIAQDFK,STELLIR,RVTIMPK,VTIMPKDIQLAR
P60981	DSTN	destrin isoform a		207		1.67		1.6102	0	7	0	6	0	31.5		YALYDASFETK,IFYDMK,KCSTPEEIKK,MIYASSKDAIK,AVIFCLSADKK,YALYDASFETKESR
P0CW22	RPS17L,RPS17	40S ribosomal protein S17		151		1.67		1.1544	0	5	0	4	0	28.8		DNYVPEVSALDQEIIEVDPDTKEMLK,VCEEIAIIPSK,RDNYVPEVSALDQEIIEVDPDTKEMLK,VCEEIAIIPSKK
P39019	RPS19	40S ribosomal protein S19		289		1.6		2.5112	0	7	0	7	0	48.2		NGVMPSHFSR,IAGQVAAANK,LKVPEWVDTVK,HKELAPYDENWFYTR,VLQALEGLK,DVNQQEFVR,PGVTVKDVNQQEFVR
P31948	STIP1	stress-induced-phosphoprotein 1 isoform b		699		1.49		2.257	0	20	0	19	0	42.3		TYEEGLKHEANNPQLK,ETKPEPMEEDLPENKK,LMDVGLIAIR,ALSVGNIDDALQCYSEAIK,HDSPEDVKR,IGNSYFKEEK,TPDVLKK,RAMADPEVQQIMSDPAMR,YKDAIHFYNK,MEQVNELK,ELDPTNMTYITNQAAVYFEK,DFDTALK,ALDLDSSCKEAADGYQR,KAAALEAMKDYTK,KAAALEFLNRFEEAK,EGLQNMEAR,ELIEQLR,TVDLKPDWGK,TLLSDPTYRELIEQLR
P60660-2	MYL6	myosin light polypeptide 6 isoform 2		198		1.47		1.7826	0	6	0	5	0	37.7		ILYSQCGDVMR,NKDQGTYEDYVEGLR,VLGNPKSDEMNVK,TGDGKILYSQCGDVMR,ALGQNPTNAEVLK
P05023-4	ATP1A1	sodium/potassium-transporting ATPase subunit alpha-1 isoform c		1549		1.4		2.5112	0	29	0	27	0	30.4		CIELCCGSVK,YGTDLSR,TDKLVNER,NIAFFSTNCVEGTAR,DKYEPAAVSEQGDKK,IAGLCNR,LIIVEGCQR,GVGIISEGNETVEDIAAR,MSINAEEVVVGDLVEVK,DGPNALTPPPTTPEWIK,VIMVTGDHPITAK,KADIGVAMGIAGSDVSK,GIVVYTGDR,LNIPVSQVNPR,AVFQANQENLPILK,VDNSSLTGESEPQTR,AVAGDASESALLK,AAVPDAVGK,ADIGVAMGIAGSDVSK,IVEIPFNSTNK,NSVFQQGMK,QGAIVAVTGDGVNDSPALK,NLEAVETLGSTSTICSDKTGTLTQNR,SPDFTNENPLETR,IISANGCKVDNSSLTGESEPQTR,AVFQANQENLPILKR,QGAIVAVTGDGVNDSPA…
P62829	RPL23	60S ribosomal protein L23		148		1.27		2.1623	0	4	0	4	0	25		IASNAGSIA,NLYIISVK,GSAITGPVAK,ECADLWPR
Q9UM00-2	TMCO1	Isoform 2 of Transmembrane and coiled-coil domain-containing protein 1		203		1.26		2.1623	0	5	0	5	0	20.7		QAGGFLGPPPPSGKFS,ILGLAPSR,QAGGFLGPPPPSGK,KKETITESAGR,ETITESAGR
Q15185-3	PTGES3	prostaglandin E synthase 3 isoform c		124		1.24		2.7276	0	4	0	4	0	36.1		HLNEIDLFHCIDPNDSK,SILCCLR,KGESGQSWPR,LTFSCLGGSDNFK
Q07955	SRSF1	serine/arginine-rich splicing factor 1 isoform 1		216		1.21		3.1246	0	7	0	7	0	38.3		YGAIRDIDLK,TKDIEDVFYK,IYVGNLPPDIR,GGPPFAFVEFEDPRDAEDAVYGR,SHEGETAYIR,EAGDVCYADVYRDGTGVVEFVR,DGYDYDGYR
P55327-4	TPD52	tumor protein D52 isoform 2		325		1.16		1.4685	0	9	0	9	0	59.4		GWQDVTATSAYKK,ASAAFSSVGSVITK,KTSETLSQAGQK,TSETLSQAGQK,VGGTKPAGGDFGEVLNSAANASATTTEPLPEKTQESL,LGINSLQELK,TDPVPEEGEDVAATISATETLSEEEQEELRR,GWQDVTATSAYK,GEQGLLR
Q13938	CAPS	Calcyphosin		265		1.09		2.1623	0	6	0	6	0	31.7		LGLVLDQAEAEGVCR,SGEWTEDEVLRR,SLDADEFRQGLAK,GASGIQGLAR,SGEWTEDEVLR,EAVIAAAFAK
Q16836	HADH	Hydroxyacyl-coenzyme A dehydrogenase, mitochondrial		281		1.09		1.5119	0	7	0	7	0	20		TFESLVDFSK,GIEESLRK,LYERGDASKEDIDTAMK,LVEVIKTPMTSQK,TGEGFYK,GDASKEDIDTAMK,AGDEFVEK
P22234	PAICS	Multifunctional protein ADE2 isoform 2		395		1.08		1.6827	0	10	0	10	0	27.5		EVTPEGLQMVK,EIVLADVIDNDSWR,IKAEYEGDGIPTVFVAVAGR,EVYELLDSPGK,VTSAHKGPDETLR,DQITAGNAAR,VVVLMGSTSDLGHCEK,IATGSFLK,TKEVYELLDSPGK,ACGNFGIPCELR
P40227	CCT6A	t-complex protein 1 subunit zeta isoform a		582		1.04		2.1623	0	14	0	13	0	27.3		QADLYISEGLHPR,NAIDDGCVVPGAGAVEVAMAEALIK,MLVSGAGDIK,FTFIEK,GIDPFSLDALSK,SETDTSLIR,VCGDSDKGFVVINQK,ALQFLEEVK,KFIEDR,KQDEPIDLFMIEIMEMK,GLVLDHGAR,SVTLLIK,GLQDVLR
P10412	HIST1H1E	Histone H1.4		195		1.04		0.6681	0	5	0	5	0	13.2		ALAAAGYDVEKNNSR,ALAAAGYDVEK,ASGPPVSELITK,KALAAAGYDVEKNNSR,KASGPPVSELITK
O14818	PSMA7	Proteasome subunit alpha type-7		295		0.96		1.6827	0	6	0	6	0	35		EFLEKNYTDEAIETDDLTIK,AITVFSPDGHLFQVEYAQEAVK,ALLEVVQSGGK,ARVECQSHR,GRDIVVLGVEK,LTVEDPVTVEYITR
P62280	RPS11	40S ribosomal protein S11		158		0.95		2.1623	0	5	0	5	0	34.1		EAIEGTYIDKK,ILSGVVTK,VLLGETGKEKLPR,AYQKQPTIFQNK,CPFTGNVSIR
P49755	TMED10	Transmembrane emp24 domain-containing protein 10 precursor		163		0.87		1.848	0	5	0	5	0	29.2		LKPLEVELR,ITDSAGHILYSKEDATK,IPDQLVILDMK,RLEDLSESIVNDFAYMK,NYEEIAKVEK
Q9GZZ1-2	NAA50	Hypothetical protein		117		0.87		1.5119	0	3	0	3	0	35.8		RIEPADAHVLQK,IEPADAHVLQK,NLKVPSGQNADVQKTDN
P12814	ACTN1	Alpha-actinin-1 isoform b		865		0.86		1.0962	0	22	0	20	0	26		GYEEWLLNEIR,FAIQDISVEETSAK,ICDQWDNLGALTQK,CQLEINFNTLQTK,RDQALTEEHAR,LDHLAEK,HRPELIDYGK,FAIQDISVEETSAKEGLLLWCQR,ACLISLGYDIGNDPQGEAEFAR,HTNYTMEHIR,TINEVENQILTR,QKDYETATLSEIK,EGLLLWCQR,GYEEWLLNEIRR,GISQEQMNEFR,IDQLEGDHQLIQEALIFDNK,KDDPLTNLNTAFDVAEK,ASIHEAWTDGK,ELPPDQAEYCIAR,LSNRPAFMPSEGR
P62244	RPS15A	40S ribosomal protein S15a		116		0.85		0.51991	0	4	0	3	0	13.8		VRMNVLADALK,MNVLADALK,CGVISPR
O96000	NDUFB10	NADH dehydrogenase [ubiquinone] 1 beta subcomplex subunit 10		196		0.81		3.3288	0	5	0	5	0	45.9		TPVQPNPIVYMMK,EGQNYQQNCIKEVEQFTQVAK,AYQDRYQDLGAYSSAR,PDSWDKDVYPEPPR,DYKVDQEIINIMQDR
P30084	ECHS1	Enoyl-CoA hydratase, mitochondrial		168		0.81		0.6681	0	7	0	4	0	20.3		ESVNAAFEMTLTEGSKLEK,SLAMEMVLTGDR,SLAMEMVLTGDRISAQDAK,AQFAQPEILIGTIPGAGGTQR
Q99714	HSD17B10	3-hydroxyacyl-CoA dehydrogenase type-2 isoform 1		284		0.79		1.4245	0	5	0	5	0	28.7		LVGQGASAVLLDLPNSGGEAQAK,GGIVGMTLPIAR,LVAGEMGQNEPDQGGQR,VDVAVNCAGIAVASK,DLAPIGIR
Q9UBX3-2	SLC25A10	mitochondrial dicarboxylate carrier isoform 1		246		0.79		1.3714	0	7	0	6	0	22.9		NYAHALDGLYR,MQNDVKLPQGQR,VHLQTQQEVK,LGPLAFYK,LFSGATMASSR,GALVTVGQLSCYDQAK
P15559-2	NQO1	NAD(P)H dehydrogenase [quinone] 1 isoform b		184		0.78		2.1623	0	5	0	5	0	24.1		TSFNYAMKEAAAAALK,ALIVLAHSER,FGLSVGHHLGK,IQILEGWK,EGHLSPDIVAEQK
O00264	PGRMC1	membrane-associated progesterone receptor component 1 isoform 1		219		0.77		2.5938	0	6	0	6	0	31.7		IVRGDQPAASGDSDDDEPPPLPR,ILMAINGK,RDFTPAELR,DFTPAELR,FDGVQDPR,FYGPEGPYGVFAGR
Q9UL46	PSME2	proteasome activator complex subunit 2		211		0.77		1.4484	0	7	0	6	0	25.9		GEEKPSMY,ASKETHVMDYR,ALVHERDEAAYGELR,CGFLPGNEK,TKVEAFQTTISK,AMVLDLR
P00568	AK1	Adenylate kinase isoenzyme 1		153		0.77		1.1544	0	4	0	4	0	27.8		EVQQGEEFER,IIFVVGGPGSGK,IGQPTLLLYVDAGPETMTQR,ATEPVIAFYEKR
P47755	CAPZA2	F-actin-capping protein subunit alpha-2		283		0.77		0.9307	0	7	0	5	0	27.9		EATDPRPCEVENAVESWR,IVEAAENEYQTAISENYQTMSDTTFK,LLLNNDNLLR,TSVETALR,FIIHAPPGEFNEVFNDVR
P61204-2	ARF3	unnamed protein product		90		0.77		0.33352	0	4	0	2	0	14.5		ILMVGLDAAGK,VNEAREELMR
O95336	PGLS	6-phosphogluconolactonase		209		0.76		1.6102	0	5	0	5	0	25.1		LCWFLDEAAAR,ILEDQEENPLPAALVQPHTGK,ELPAAVAPAGPASLAR,LLTVPFEK,AACCLAGAR
P27824	CANX	calnexin precursor		496		0.76		1.4245	0	13	0	13	0	20.7		AEEDEILNR,IVDDWANDGWGLK,GLVLMSR,IVDDWANDGWGLKK,CESAPGCGVWQRPVIDNPNYK,QTSGMEYK,TGIYEEK,KIPNPDFFEDLEPFR,TYFTDKK,VTYKAPVPTGEVYFADSFDR,APVPTGEVYFADSFDR,LPGDKGLVLMSR,GTLSGWILSK
Q15126	PMVK	phosphomevalonate kinase		129		0.76		1.1544	0	4	0	4	0	18.7		LVLLFSGK,EAYGAVTQTVR,VVALEQSR,QADPGFFCR
P62136-2	PPP1CA	serine/threonine-protein phosphatase PP1-alpha catalytic subunit isoform 3		257		0.76		0.89574	0	6	0	6	0	18.4		NVQLTENEIR,IYGFYDECK,IFCCHGGLSPDLQSMEQIR,GNHECASINR,AHQVVEDGYEFFAKR,AHQVVEDGYEFFAK
P08134	RHOC	rho-related GTP-binding protein RhoC precursor		185		0.75		1.7826	0	5	0	4	0	19.1		EVFEMATR,LVIVGDGACGK,WTPEVK,ISAFGYLECSAK
P62249	RPS16	40S ribosomal protein S16		140		0.75		0.99526	0	4	0	4	0	26.7		EIKDILIQYDR,VNGRPLEMIEPR,KFGGPGAR,TLLVADPR
P20339-2	RAB5A	ras-related protein rab-5a isoform 2		140		0.75		0.87382	0	4	0	3	0	21.8		TSMNVNEIFMAIAK,GAQAAIVVYDITNEESFAR,LVLLGESAVGK
P06493	CDK1	cyclin-dependent kinase 1 isoform 1		248		0.75		0.7302	0	6	0	5	0	20.5		LESEEEGVPSTAIR,LADFGLAR,IGEGTYGVVYK,DLKPQNLLIDDKGTIK,NLDENGLDLLSK
Q15819	UBE2V2	Ubiquitin-conjugating enzyme E2 variant 2		88		0.75		0.51991	0	3	0	2	0	17.2		VECGPKYPEAPPSVR,WTGMIIGPPR
O14579-3	COPE	coatomer subunit epsilon isoform c		127		0.73		1.6102	0	5	0	4	0	23.4		DVERDVFLYR,ENDFDRLVLQYAPSA,DSIVAELDREMSR,APPAPGPASGGSGEVDELFDVK
P51153	RAB13	Ras-related protein Rab-13 isoform 1		177		0.72		1.0309	0	4	0	4	0	20.1		SSMNVDEAFSSLAR,SIKENASAGVER,TITTAYYR,FFETSAK
Q12792-4	TWF1	PTK9 protein tyrosine kinase 9, isoform CRA_a		223		0.72		0.96842	0	6	0	5	0	25		KIEIDNGDELTADFLYEEVHPK,LLEIVER,EAFQALEK,INEVQTDVGVDTK,LIRGPAETEATTD
Q6IS14	EIF5AL1	Eukaryotic translation initiation factor 5A-1-like		88		0.72		0.3895	0	3	0	2	0	5.1		KNGFVVLK,NGFVVLK
P61088	UBE2N	ubiquitin-conjugating enzyme E2 N		136		0.71		1.7826	0	3	0	3	0	26.9		TNEAQAIETAR,IYHPNVDKLGR,LLAEPVPGIKAEPDESNAR
P36543-2	ATP6V1E1	V-type proton ATPase subunit E 1 isoform b		178		0.7		1.0309	0	5	0	5	0	23		IQMSNLMNQAR,EKQIEQQK,LDLIAQQMMPEVR,ARDDLITDLLNEAK,KEKQIEQQK
P11233	RALA	Ras-related protein Ral-A precursor		157		0.69		1.1544	0	4	0	4	0	26.2		VIMVGSGGVGK,NRAEQWNVNYVETSAK,ANVDKVFFDLMR,VKEDENVPFLLVGNK
P62873	GNB1	guanine nucleotide-binding protein G(I)/G(S)/G(T) subunit beta-1 isoform 1		256		0.65		1.8943	0	6	0	6	0	25.8		AGVLAGHDNR,KACADATLSQITNNIDPVGR,VSCLGVTDDGMAVATGSWDSFLK,ELAGHTGYLSCCR,LLVSASQDGK,LFVSGACDASAK
Q01130	SRSF2	serine/arginine-rich splicing factor 2		233		0.64		2.5938	0	6	0	6	0	22.1		VDNLTYR,RYGGGGYGR,DAEDAMDAMDGAVLDGR,TSPDTLRR,YGGGGYGR,VGDVYIPR
P46783	RPS10	40S ribosomal protein S10		194		0.64		0.77828	0	4	0	4	0	20		AEAGAGSATEFQFR,SAVPPGADKKAEAGAGSATEFQFR,GLEGERPAR,KAEAGAGSATEFQFR
Q9Y2Q3	GSTK1	glutathione S-transferase kappa 1 isoform a		196		0.63		0.84785	0	5	0	4	0	26.9		DSGNKPPGLLPR,FLTAVNLEHPEMLEK,AGMSAEQAQGLLEK,VWSRNEDITEPQSILAAAEK
P20839-3	IMPDH1	inosine-5'-monophosphate dehydrogenase 1 isoform b		416		0.61		1.4621	0	9	0	9	0	21.4		DIDFLAEKDHTTLLSEVMTPR,FEQGFITDPVVLSPSHTVGDVLEAK,GKLPIVNDCDELVAIIAR,HGFSGIPITETGTMGSK,NLIDAGVDGLR,IAQGVSGSIQDK,KFEQGFITDPVVLSPSHTVGDVLEAK,LVGIVTSR,EANEILQR
P13693	TPT1	translationally-controlled tumor protein isoform 2		157		0.61		0.77828	0	4	0	4	0	20.3		VKPFMTGAAEQIK,IREIADGLCLEVEGK,EIADGLCLEVEGK,YIKDYMK
O14950	MYL12B	Myosin regulatory light chain 12B		115		0.6		1.3714	0	3	0	2	0	17.4		ELLTTMGDRFTDEEVDELYR,GNFNYIEFTR
P54136	RARS	arginine--tRNA ligase, cytoplasmic		444		0.59		0.88365	0	11	0	10	0	19.2		LQEVFGHAIK,EIAENITK,SDGGYTYDTSDLAAIK,LFEFAGYDVLR,IYDALDVSLIER,VIVDFSSPNIAK,LANIDEEMLQK,LLQQEEEIKSLTAEIDR,AAYPDLENPPLLVTPSQQAK,STIIGESISR
P49207	RPL34	60S ribosomal protein L34		105		0.57		2.1623	0	3	0	3	0	25.6		LSYNTASNK,SACGVCPGR,AFLIEEQKIVVK
P62316	SNRPD2	Small nuclear ribonucleoprotein Sm D2 isoform 1		114		0.56		0.77828	0	3	0	3	0	17.7		SEMTPEELQKR,SEMTPEELQK,NNTQVLINCR
P32322-3	PYCR1	pyrroline-5-carboxylate reductase 1, mitochondrial isoform 5		250		0.55		1.4245	0	5	0	5	0	21.9		SLLINAVEASCIR,EGATVYATGTHAQVEDGR,ELQSMADQEQVSPAAIKK,LDSPAGTALSPSGHTK,LGAQALLGAAK
P30040	ERP29	endoplasmic reticulum resident protein 29 isoform 1 precursor		194		0.54		1.1544	0	4	0	4	0	19.9		ILDQGEDFPASEMTR,SLNILTAFQK,GALPLDTVTFYK,DGDFENPVPYTGAVK
P59998-3	ARPC4	actin-related protein 2/3 complex subunit 4 isoform c		137		0.54		0.87382	0	4	0	4	0	16		AENFFILR,SSKELLLQPVTISR,IVAEEFLK,ELLLQPVTISR
P62879	GNB2	Guanine nucleotide-binding protein G(I)/G(S)/G(T) subunit beta-2		241		0.52		1.4245	0	6	0	6	0	22		AGVLAGHDNR,KACGDSTLTQITAGLDPVGR,ACGDSTLTQITAGLDPVGR,VSCLGVTDDGMAVATGSWDSFLK,LLVSASQDGK,TFVSGACDASIK
P37108	SRP14	signal recognition particle 14 kDa protein isoform 1		109		0.52		0.9307	0	2	0	2	0	22.7		KGTVEGFEPADNKCLLR,VLLESEQFLTELTR
P68363-2	TUBA1B	TUBA1B protein		208		0.52		0.6681	0	5	0	5	0	18.2		SIQFVDWCPTGFK,VGINYQPPTVVPGGDLAK,DVNAAIATIK,AVFVDLEPTVIDEVRTGTYR,AVFVDLEPTVIDEVR
O75251-2	NDUFS7	unnamed protein product		150		0.52		0.63789	0	3	0	3	0	15.5		QSDVMIVAGTLTNK,LDDLVNWAR,VYDQMPEPR
P35268	RPL22	60S ribosomal protein L22 proprotein		86		0.51		4.6234	0	3	0	3	0	30.4		VVANSKESYELR,ITVTSEVPFSKR,YFQINQDEEEEEDED
P49915	GMPS	GMP synthase [glutamine-hydrolyzing]		378		0.51		0.91448	0	12	0	11	0	19.1		TVGVQGDCR,ELGLPEELVSR,VVYIFGPPVK,GLQKEEVVLLTHGDSVDKVADGFK,TLNMTTSPEEK,HPFPGPGLAIR,VICAEEPYICKDFPETNNILK,SGNIVAGIANESK,LENAGGDLK,ISKTLNMTTSPEEK,QADFEAHNILR
Q9UNL2-2	SSR3	translocon-associated protein subunit gamma isoform 1		105		0.51		0.58489	0	2	0	2	0	9		GSSKQQSEEDLLLQDFSR,QQSEEDLLLQDFSR
O75874	IDH1	Isocitrate dehydrogenase [NADP] cytoplasmic		232		0.5		0.85879	0	6	0	6	0	19.5		KISGGSVVEMQGDEMTR,ATDFVVPGPGKVEITYTPSDGTQK,LIDDMVAQAMK,IIWELIK,TVEAEAAHGTVTR,NILGGTVFR
O75828	CBR3	Carbonyl reductase [NADPH] 3		215		0.5		0.71907	0	4	0	4	0	16.2		GQAAVQQLQAEGLSPR,FHQLDIDDLQSIR,LGVTVLSR,GIGLAIAR
P43487-2	RANBP1	ran-specific GTPase-activating protein isoform 3		127		0.49		1.3714	0	3	0	3	0	16.5		TLEEDEEELFK,FLNAENAQK,FASENDLPEWKER
O00764-2	PDXK	hCG401289, isoform CRA_c		138		0.49		0.63789	0	4	0	3	0	15.4		VLSIQSHVIR,GQVLNSDELQELYEGLR,AQAGEGVRPSPMQLELR
P51149	RAB7A	ras-related protein Rab-7a		178		0.48		0.96842	0	5	0	5	0	21.7		AQAWCYSK,NNIPYFETSAK,FSNQYK,IDLENR,EAINVEQAFQTIAR
P61224-2	RAP1B	ras-related protein Rap-1b isoform 4		90		0.48		0.9307	0	2	0	2	0	17.5		QWNNCAFLESSAK,LVVLGSGGVGK
P61006	RAB8A	Ras-related protein Rab-8A		195		0.48		0.84785	0	5	0	5	0	19.8		TIELDGK,TITTAYYR,KLEGNSPQGSNQGVK,LQIWDTAGQER,LEGNSPQGSNQGVK
P82979	SARNP	SAP domain-containing ribonucleoprotein		130		0.48		0.77828	0	3	0	3	0	13.8		FGISSVPTK,ITSEIPQTER,FGLNVSSISR
Q8WUY1	THEM6	protein THEM6 precursor		118		0.48		0.4251	0	3	0	2	0	10		YLREADFAR,MESGLSDVTKDQ
O75947-2	ATP5H	ATP synthase subunit d, mitochondrial isoform b		108		0.47		1.3714	0	3	0	3	0	20.4		SCAEWVSLSK,SWNETLTSR,AGLVDDFEK
Q14103-3	HNRNPD	Heterogeneous nuclear ribonucleoprotein D0 isoform c		198		0.47		1.1544	0	5	0	5	0	18.6		FGEVVDCTLKLDPITGR,IDASKNEEDEGHSNSSPR,FGEVVDCTLK,GFGFVLFK,IFVGGLSPDTPEEK
Q15056-2	EIF4H	eukaryotic translation initiation factor 4H isoform 2		118		0.45		0.9307	0	4	0	3	0	14		AYSSFGGGR,GSNMDFREPTEEER,EEVVQKEQE
P46776	RPL27A	60S ribosomal protein L27a		75		0.45		0.3895	0	2	0	2	0	8.7		TGAAPIIDVVR,NKTGAAPIIDVVR
O00154-2	ACOT7	Brain acyl-CoA hydrolase		121.5		0.445		0.91084	0	6	0	6	0	29.6		CVAALAR,IMRPDDANVAGNVHGGTILK,LMDEVAGIVAAR,VLEVPPVVYSR,ATLWYVPLSLK,MIEEAGAIISTR
P00403	COX2	Cytochrome c oxidase subunit 2		90		0.44		1.1544	0	3	0	3	0	7.4		LLDVDNRVVLPIEAPIR,VVLPIEAPIR,LLDVDNR
P50416	CPT1A	carnitine O-palmitoyltransferase 1, liver isoform isoform 1		562		0.44		1.0753	0	12	0	12	0	20.5		NKQSLDAVEK,LPVPAVKDTVNR,SCTTESCDFVR,FSCPETDSHR,YLAVESPFLK,TLETANCMSSQTK,ILDNTSEPQPGEAR,IPGEETDTIQHMR,AMVDPAQTVEQR,AAFFVTLDETEEGYRSEDPDTSMDSYAK,AGNAIHAILLYR,LAALTAGDRVPWAR
Q13404-1	TMEM189-UBE2V1	DNA-binding protein		120		0.44		0.70125	0	4	0	3	0	20.3		IECGPKYPEAPPFVR,WTGMIIGPPR,FVTKINMNGVNSSNGVVDPR
Q13162	PRDX4	peroxiredoxin-4 precursor		137.5		0.435		0.86609	0	4	0	4	0	19.1		ISKPAPYWEGTAVIDGEFKELK,QITLNDLPVGR,SVDETLR,GLFIIDDKGILR
Q16629-4	SRSF7	serine/arginine-rich splicing factor 7 isoform 2		133		0.43		1.6102	0	4	0	4	0	24.7		AFSYYGPLR,NPPGFAFVEFEDPRDAEDAVR,VYVGNLGTGAGKGELER,SISRPRSSR
P61254	RPL26	60S ribosomal protein L26		83		0.43		1.3714	0	3	0	3	0	20.6		IMSSPLSK,MKFNPFVTSDR,YKEETIEKMQE
P30038	ALDH4A1	delta-1-pyrroline-5-carboxylate dehydrogenase, mitochondrial isoform a precursor		372		0.43		0.77828	0	9	0	9	0	16.6		SADVESVVSGTLR,VANEPVLAFTQGSPER,VANEPVLAFTQGSPERDALQK,QVAQNLDR,SAFEYGGQK,LLEEHSR,AADMLSGPR,SSPSLTILAGGK,STGSIVGQQPFGGAR
P13804	ETFA	electron transfer flavoprotein subunit alpha, mitochondrial isoform a		196		0.43		0.6681	0	4	0	4	0	17.7		ASSTSPVEISEWLDQK,LGGEVSCLVAGTK,GTSFDAAATSGGSASSEK,TIYAGNALCTVK
Q99729-2	HNRNPAB	Heterogeneous nuclear ribonucleoprotein A/B isoform a		207.5		0.425		1.5782	0	6	0	6	0	22.5		FGEVVDCTIK,GFVFITFKEEEPVKK,EVYQQQQYGSGGR,VLDQKEHR,GFGFILFKDAASVEK,IFVGGLNPEATEEK
Q8NBN7	RDH13	retinol dehydrogenase 13 isoform 1 precursor		175		0.42		0.41254	0	4	0	4	0	9.3		QTALELAR,QKAPAPEAEDEEVAR,APAPEAEDEEVAR,HLDLASLK
Q8WVJ2	NUDCD2	NudC domain-containing protein 2		88		0.41		1.1544	0	2	0	2	0	13.3		AQDIQCGLQSR,GGPDFSNLEK
P40763-3	STAT3	signal transducer and activator of transcription 3 isoform 3		590		0.41		1.1544	0	13	0	13	0	21.8		LLQTAATAAQQGGQANHPTAAVVTEK,TLTDEELADWK,KLEELQQK,FLQESNVLYQHNLR,RVQDLEQK,CLWEESR,TGVQFTTK,TQIQSVEPYTK,KFNILGTNTK,YCRPESQEHPEADPGSAAPYLK,IVELFR,VVENLQDDFDFNYK,GLSIEQLTTLAEK
O15260-2	SURF4	surfeit locus protein 4 isoform 3		57		0.41		1.1544	0	2	0	2	0	17.6		GQNDLMGTAEDFADQFLR,SMFAGVPTMR
Q9UNE7-2	STUB1	E3 ubiquitin-protein ligase CHIP isoform b		124		0.41		0.53993	0	3	0	3	0	13.4		ALELDGQSVK,LNFGDDIPSALR,AQQACIEAK
Q9P0L0	VAPA	vesicle-associated membrane protein-associated protein A isoform 2		137		0.4		0.9307	0	3	0	3	0	18		GPFTDVVTTNLK,HEQILVLDPPTDLK,CVFEMPNENDKLNDMEPSK
P13797-3	PLS3	plastin-3 isoform 4		255		0.4		0.60651	0	8	0	7	0	15.3		IDINMSGFNETDDLKR,MINLSVPDTIDER,AESMLQQADK,ALENDPDCR,SGNLTEDDKHNNAK,YTLNVLEDLGDGQK,VYALPEDLVEVKPK
Q9H910-2	HN1L	hematological and neurological expressed 1-like protein B		93		0.4		0.51991	0	2	0	2	0	16		TSDIFGSPVTATSR,GSGIFDESTPVQTR
Q13526	PIN1	peptidyl-prolyl cis-trans isomerase NIMA-interacting 1		58		0.4		0.51991	0	2	0	2	0	22.6		GQMQKPFEDASFALR,IKSGEEDFESLASQFSDCSSAK
P61966	AP1S1	AP-1 complex subunit sigma-1A		79		0.39		1.1544	0	2	0	2	0	21.5		ELMQVVLAR,AIEQADLLQEEDESPRSVLEEMGLA
P04632	CAPNS1	calpain small subunit 1 isoform 1		165		0.39		1.0309	0	5	0	5	0	16.4		THYSNIEANESEEVRQFR,WQAIYK,THYSNIEANESEEVR,LGFEEFK,SMVAVMDSDTTGK
P46778	RPL21	60S ribosomal protein L21		63		0.39		0.77828	0	2	0	2	0	15.6		TNGKEPELLEPIPYEFMA,GTWVQLK
Q05655	PRKCD	protein kinase C delta type		425		0.39		0.60157	0	10	0	10	0	19		RSDSASSEPVGIYQGFEK,VLLGELK,IAFNSYELGSLQAEDEANQPFCAVK,AAEEPVSEVTVGVSVLAER,LGVTGNIK,AEFWLDLQPQAK,RLEPPFRPK,DYSNFDQEFLNEK,TGVAGEDMQDNSGTYGK,KTGVAGEDMQDNSGTYGK
Q06323-2	PSME1	proteasome activator complex subunit 1 isoform 2		130		0.39		0.4678	0	3	0	3	0	11.2		LMVMEIR,IVVLLQR,IEDGNNFGVAVQEK
O95861-4	BPNT1	3'(2'),5'-bisphosphate nucleotidase 1 isoform 3		191		0.38		0.96842	0	5	0	5	0	16.9		IIQLIEGK,HIITTTR,LAQMSICSSLAR,LVASAYSIAQK,NYDYYASR
P61020-2	RAB5B	ras-related protein Rab-5B isoform 2		95		0.38		0.9307	0	2	0	2	0	13.2		LVLLGESAVGK,SEPQNLGGAAGR
P50552	VASP	Vasodilator-stimulated phosphoprotein		181		0.37		0.89574	0	5	0	5	0	15.2		QEEASGGPTAPK,TPKDESANQEEPEAR,VKEEIIEAFVQELR,KATQVGEKTPK,VPAQSESVR
P16949-2	STMN1	stathmin isoform b		67		0.37		0.77828	0	2	0	2	0	13.2		AIEENNNFSK,ASGQAFELILSPR
P17844-2	DDX5	unnamed protein product		309		0.37		0.74333	0	7	0	7	0	14.3		LIDFLECGK,GVEICIATPGR,APILIATDVASR,GDGPICLVLAPTR,STCIYGGAPK,TGTAYTFFTPNNIK,GLDVEDVK
Q9Y230	RUVBL2	RuvB-like 2		208		0.37		0.6681	0	6	0	6	0	17.4		GTEVQVDDIKR,DYDAMGSQTK,QASQGMVGQLAAR,LLIVSTTPYSEKDTK,AVLIAGQPGTGK,TQGFLALFSGDTGEIKSEVR
O43399-2	TPD52L2	tumor protein D54 isoform f		108		0.37		0.6681	0	2	0	2	0	13.4		TQETLSQAGQK,TSAALSTVGSAISR
O43665-2	RGS10	regulator of G-protein signaling 10 isoform b		72		0.37		0.51991	0	2	0	2	0	17.3		TEEEEEDLPDAQTAAKR,ASSQVNVEGQSR
O75489	NDUFS3	NADH dehydrogenase [ubiquinone] iron-sulfur protein 3, mitochondrial precursor		156		0.37		0.50131	0	3	0	3	0	14		SLVDLTAVDVPTR,VVAEPVELAQEFR,DFPLSGYVELR
Q9Y5M8	SRPRB	signal recognition particle receptor subunit beta		99		0.37		0.4678	0	3	0	3	0	11		LIQQQLEKELNTLR,GNSLTLIDLPGHESLR,LIQQQLEK
Q16181	39326	septin-7 isoform 1		150		0.37		0.44544	0	5	0	4	0	9.3		ILEQQNSSR,SPLAQMEEERR,VNIIPLIAK,SVNSSTMVAQQK
P62633-2	CNBP	cellular nucleic acid-binding protein isoform 6		80		0.37		0.4251	0	2	0	2	0	12.3		CGETGHVAINCSK,TSEVNCYR
Q6P996-4	PDXDC1	pyridoxal-dependent decarboxylase domain-containing protein 1 isoform 3		285		0.36		0.4816	0	7	0	7	0	11.5		FFQELPGSDPVFK,HSCDALNR,TFNLTAGSLESTEPIYVYK,AVPVPNMTPSGVGR,ILVEDELSSPVVVFR,LLEEGVLR,IADPTLAEMGK
Q9NQR4	NIT2	Omega-amidase NIT2		121		0.36		0.4678	0	3	0	3	0	13.4		TLSPGDSFSTFDTPYCR,SDLYAVEMK,FAELAQIYAQR
Q9NRX2	MRPL17	39S ribosomal protein L17, mitochondrial		66		0.36		0.3895	0	2	0	2	0	10.2		LFQVLAPR,YKDQTGGYTR
Q96FW1	OTUB1	Ubiquitin thioesterase otub1		101		0.35		1.1544	0	3	0	3	0	16.2		LELSVLYKEYAEDDNIYQQK,IQQEIAVQNPLVSER,LLTSGYLQR
Q9Y2B0	CNPY2	protein canopy homolog 2 isoform 1 precursor		131		0.35		0.87382	0	3	0	3	0	22.5		SEAHLTELLEEICDR,INPDGSQSVVEVPYAR,SQDLHCGACR
Q13200-3	PSMD2	26S proteasome non-ATPase regulatory subunit 2 isoform 2		350		0.35		0.63789	0	8	0	8	0	12		HLAGEVAK,VGQAVDVVGQAGKPK,MLVTFDEELRPLPVSVR,CALGVFR,SETELKDTYAR,FGGSGSQVDSAR,LNILDTLSK,ELDIMEPKVPDDIYK
Q9H0U6	MRPL18	39S ribosomal protein L18, mitochondrial		71		0.35		0.58489	0	2	0	2	0	10.5		NLELLSVAR,NVVACESIGR
P30626-2	SRI	sorcin isoform B		65		0.35		0.51991	0	2	0	2	0	10.3		SGTVDPQELQK,ALTTMGFR
Q9H7Z7	PTGES2	prostaglandin E synthase 2 isoform 1		161		0.35		0.4678	0	4	0	4	0	11.1		SAAQLSLSSR,AITEASPAH,LQLTLYQYK,TPTEALASFDYIVR
O15145	ARPC3	actin-related protein 2/3 complex subunit 3 isoform 1		80		0.35		0.25893	0	2	0	2	0	12.3		SQFKGPAPR,PAYHSSLMDPDTK
Q14165	MLEC	malectin isoform1 precursor		131		0.34		0.77828	0	3	0	3	0	16.4		FAEVYFAQSQQK,SNPEDQILYQTER,YNEETFGYEVPIKEEGDYVLVLK
P62834	RAP1A	ras-related protein Rap-1A precursor		73		0.34		0.6681	0	2	0	2	0	13		LVVLGSGGVGK,QWCNCAFLESSAK
P01111	NRAS	GTPase NRas		85		0.34		0.58489	0	2	0	2	0	12.1		QGVEDAFYTLVR,LVVVGAGGVGK
O43396	TXNL1	Thioredoxin-like protein 1		146		0.34		0.58489	0	3	0	3	0	15.2		IFINLPR,VGVKPVGSDPDFQPELSGAGSR,IDQYQGADAVGLEEK
Q9UBQ0-2	VPS29	vacuolar protein sorting-associated protein 29 isoform 2		67		0.34		0.58489	0	2	0	2	0	10.7		ESYDYLK,GDFDENLNYPEQK
P04844-2	RPN2	dolichyl-diphosphooligosaccharide--protein glycosyltransferase subunit 2 isoform 2 precursor		297		0.33		0.87382	0	5	0	5	0	14.6		MLAQQAVK,TGQEVVFVAEPDNK,ISTEVGITNVDLSTVDKDQSIAPK,FSSGYYDFLVEVEGDNR,LSKEETVLATVQALQTASHLSQQADLR
P62333	PSMC6	26S protease regulatory subunit 10B		168		0.33		0.64965	0	5	0	5	0	14.1		EVIELPLTNPELFQR,VVSSSIVDKYIGESAR,FSEGTSADR,AVASQLDCNFLK,ELREVIELPLTNPELFQR
Q8WXF1-2	PSPC1	paraspeckle component 1, isoform CRA_b		211		0.32		1.0691	0	5	0	5	0	16.7		TLAEIAKAELDGTILK,LFVGNLPTDITEEDFKR,YGEPSEVFINR,AVVVVDDR,FAQPGTFEFEYASR
P51572-2	BCAP31	B-cell receptor-associated protein 31 isoform a		116		0.32		1.0011	0	6	0	5	0	18.2		AENQVLAMR,GAAVDGGKLDVGNAEVKLEEENR,LQAAVDGPMDKKEE,LDVGNAEVKLEEENR,QAESASEAAKK
Q96IU4	ABHD14B	alpha/beta hydrolase domain-containing protein 14B isoform 1		85		0.32		0.99526	0	3	0	3	0	21.4		TPALIVYGDQDPMGQTSFEHLK,AVAIDLPGLGHSK,EALPGSGQAR
Q99613-2	EIF3C	eukaryotic translation initiation factor 3 subunit C isoform b		496		0.32		0.77828	0	11	0	11	0	12.9		QLTPPEGSSK,ELLGQGLLLR,TEPTAQQNLALQLAEK,AKELLGQGLLLR,QGTYGGYFR,RLDEEEEDNEGGEWER,VWDLFPEADKVR,DAHNALLDIQSSGR,KLNEILQAR,CLEEFELLGK,FEELTNLIR
Q9NR31	SAR1A	GTP-binding protein SAR1a		72		0.32		0.58489	0	2	0	2	0	9.5		QGYGEGFR,LVFLGLDNAGK
Q92841	DDX17	probable ATP-dependent RNA helicase DDX17 isoform 1		315		0.32		0.53993	0	7	0	6	0	10.4		DMVGIAQTGSGK,VLEEANQAINPK,APILIATDVASR,SSQSSSQQFSGIGR,GTAYTFFTPGNLK,APLPDLYPFGTMR
P50225	SULT1A1	sulfotransferase 1A1 isoform a		118		0.32		0.50131	0	3	0	3	0	8.1		TTFTVAQNER,ILEFVGR,VPFLEFK
O15382-2	BCAT2	branched-chain-amino-acid aminotransferase, mitochondrial isoform b		81		0.32		0.4678	0	3	0	2	0	8.6		AWVGGVGNYK,NLHIPTMENGPELILR
P23193	TCEA1	Transcription elongation factor A protein 1 isoform 1		135		0.32		0.4678	0	3	0	3	0	10.9		NCTYTQVQTR,NAAGALDLLK,TGGTQTDLFTCGK
A6NDG6	PGP	Phosphoglycolate phosphatase		69		0.32		0.29155	0	2	0	2	0	7.4		AVEMAAQR,FIFDCVSQEYGINPER
Q15286	RAB35	ras-related protein Rab-35 isoform 1		92		0.31		0.4251	0	2	0	2	0	12.4		QQQQQQNDVVKLTK,LQIWDTAGQER
O75436	VPS26A	vacuolar protein sorting-associated protein 26A isoform 1		163		0.3		0.73228	0	6	0	6	0	24.1		YFLNLVLVDEEDRR,YEIMDGAPVKGESIPIR,LFLAGYDPTPTMR,ELALPGELTQSR,FESPESQASAEQPEM,QQEIILWR
Q9HCC0	MCCC2	Methylcrotonoyl-CoA carboxylase beta chain, mitochondrial		204		0.3		0.63789	0	7	0	6	0	13.6		AATGEEVSAEDLGGADLHCR,EYEAEGIAK,GGAYYPVTVK,AQEIAMQNR,QGTIFLAGPPLVK,QFSSADEAALKEPIIK
P13674-2	P4HA1	prolyl 4-hydroxylase subunit alpha-1 isoform 1 precursor		204		0.3		0.61026	0	5	0	5	0	12.3		KDEPDAFKELGTGNR,FHDIISDAEIEIVK,GVAVDYLPER,LQDTYNLDTDTISK,SFLTAEDCFELGK
O00217	NDUFS8	NADH dehydrogenase [ubiquinone] iron-sulfur protein 8, mitochondrial precursor		79		0.3		0.51991	0	2	0	2	0	12.3		LCEAICPAQAITIEAEPR,RYPSGEER
O43242	PSMD3	26S proteasome non-ATPase regulatory subunit 3		180		0.3		0.48398	0	5	0	5	0	16.1		FNQVLDQFGEK,NYLHYSLYDQAEK,VYEFLDKLDVVR,AKPPPGGGEQEPPPPPAPQDVEMKEEAATGGGSTGEADGK,AIQLEYSEAR
Q9UJU6	DBNL	Drebrin-like protein isoform b		191		0.3		0.4678	0	4	0	4	0	11.6		NRNEQESAVHPR,FVLINWTGEGVNDVR,TWEQQQEVVSR,YQEQGGEASPQR
P33176	KIF5B	Kinesin-1 heavy chain		466		0.3		0.44974	0	10	0	10	0	12.9		NTIQWLENELNR,QLEESVDALSEELVQLR,HVAVTNMNEHSSR,SLTEYLQNVEQK,ILQDSLGGNCR,ISFLENNLEQLTK,SAEIDSDDTGGSAAQK,SATLASIDAELQK,YQQEVDR,LYLVDLAGSEK
P31937	HIBADH	3-hydroxyisobutyrate dehydrogenase, mitochondrial precursor		107		0.3		0.4251	0	2	0	2	0	8.9		TPVGFIGLGNMGNPMAK,DLGLAQDSATSTK
P61313	RPL15	60S ribosomal protein L15 isoform 1		81		0.3		0.4251	0	2	0	2	0	7.8		NTLQLHR,SLQSVAEER
P08574	CYC1	Cytochrome c1, heme protein, mitochondrial		71		0.3		0.35936	0	4	0	2	0	9.8		LFDYFPKPYPNSEAAR,AANNGALPPDLSYIVR
P02538	KRT6A	Keratin, type II cytoskeletal 6A		187		0.3		0.34596	0	5	0	5	0	6		FASFIDK,EYQELMNVK,FASFIDKVR,FLEQQNK,AQYEEIAQR
Q14451-3	GRB7	Isoform 3 of Growth factor receptor-bound protein 7		249		0.29		0.77828	0	7	0	7	0	15.1		GLEDHESVVEVQAAWPVGGDSR,EALSVALEEAQAWR,GILPCLLR,TCWLAAFR,SVEVAAGATAR,SQPLLIPTTGR,IFCSEDEQSR
P49821-2	NDUFV1	NADH dehydrogenase [ubiquinone] flavoprotein 1, mitochondrial isoform 2 precursor		189		0.29		0.64965	0	5	0	5	0	14.2		GDARPAEIDSLWEISK,GGTWFAGFGR,GAGAYICGEETALIESIEGK,EAYEAGLIGK,HFRPELEER
Q86VP6	CAND1	cullin-associated nedd8-dissociated protein 1		484		0.29		0.6469	0	13	0	13	0	12		SVILEAFSSPSEEVK,FCNVDDDELREYCIQAFESFVR,EGPAVVGQFIQDVK,ALTLIAGSPLK,LLEDKNGEVQNLAVK,TLEDPDLNVR,QSYYSIAK,AADIDQEVKER,LKAADIDQEVKER,MLTGPVYSQSTALTHK,SSVVTAVK,IGEYLEK,HEMLPEFYK
Q9UGI8	TES	testin isoform 1		193		0.29		0.6156	0	5	0	5	0	15.4		NHAVVCQGCHNAIDPEVQR,NVMILTNPVAAK,MDLENKVK,EKQPVAGSEGAQYR,STPAAVGAMEDK
O00148	DDX39A	ATP-dependent RNA helicase DDX39A		175		0.29		0.58489	0	5	0	5	0	11		NCPHVVVGTPGR,DFLLKPELLR,DVQEIFR,ELAFQISK,ILVATNLFGR
P31689-2	DNAJA1	DnaJ (Hsp40) homolog, subfamily A, member 1, isoform CRA_b		89		0.29		0.58489	0	3	0	3	0	8.1		ILEVHIDK,TIVITSHPGQIVK,LIIEFK
P26373	RPL13	60S ribosomal protein L13 isoform 1		128		0.29		0.51991	0	3	0	3	0	10.4		STESLQANVQR,NKSTESLQANVQR,TIGISVDPR
O75746-2	SLC25A12	unnamed protein product		238		0.29		0.50859	0	5	0	5	0	8.9		DLGIFGLYK,LTVNDFVR,YEGFFGLYR,LQVAGEITTGPR,GLIPQLIGVAPEK
Q96C86	DCPS	M7GpppX diphosphatase		133		0.28		0.62378	0	4	0	4	0	13.6		TTVVYPATEK,AHLLAEVIENLECDPR,ADDPLLK,NILHQGQEAILQR
P25685	DNAJB1	dnaJ homolog subfamily B member 1 isoform 1		220		0.28		0.58489	0	4	0	4	0	17.9		FKEIAEAYDVLSDPR,EALCGCTVNVPTLDGR,VSLEEIYSGCTK,EGDQTSNNIPADIVFVLK
O43633	CHMP2A	charged multivesicular body protein 2a		88		0.28		0.51991	0	3	0	3	0	15.3		KIIADIK,AEAAASALADADADLEERLK,IMMEFER
Q00688	FKBP3	peptidyl-prolyl cis-trans isomerase FKBP3		63		0.28		0.4678	0	2	0	2	0	10.2		ARLEIEPEWAYGKK,FKGTESISK
P08779	KRT16	Keratin, type I cytoskeletal 16		257		0.28		0.3895	0	5	0	5	0	13.1		VLDELTLAR,EVFTSSSSSSSR,ISSVLAGGSCR,VLQGLEIELQSQLSMK,APSTYGGGLSVSSR
Q12907	LMAN2	vesicular integral-membrane protein VIP36 precursor		176		0.27		0.6681	0	4	0	4	0	16		DNVDDPTGNFR,WTELAGCTADFR,NLHGDGIALWYTR,DNFHGLAIFLDTYPNDETTER
Q9BVG4	CXorf26,PBDC1	protein PBDC1 isoform 1		73		0.27		0.3895	0	2	0	2	0	9		IQFFAIEIAR,LISSVDPQFLK
P62258-2	YWHAE	14-3-3 protein epsilon isoform transcript variant 1		102		0.27		0.33352	0	2	0	2	0	10.3		EAAENSLVAYK,VAGMDVELTVEER
P15170-2	GSPT1	Isoform 2 of Eukaryotic peptide chain release factor GTP-binding subunit ERF3A		152		0.26		0.55707	0	5	0	5	0	7.8		KGEFETGFEK,TFDAQIVIIEHK,FVKQDQVCIAR,HLIVLINK,ENLSAAFSR
P28482	MAPK1	mitogen-activated protein kinase 1		101		0.26		0.3895	0	3	0	3	0	7.5		LKELIFEETAR,GQVFDVGPR,ALDLLDK
O95571	ETHE1	Persulfide dioxygenase ETHE1, mitochondrial		108		0.255		0.72801	0	4	0	4	0	17.7		TDFQQGCAK,EAVLIDPVLETAPR,GGSGAPILLR,SLLPGCQSVISR
Q92597	NDRG1	Protein NDRG1 isoform 1		181		0.25		1.3101	0	4	0	4	0	17.7		MADCGGLPQISQPAK,EMQDVDLAEVKPLVEK,TASGSSVTSLDGTR,SHTSEGAHLDITPNSGAAGNSAGPK
Q8NFV4-6	ABHD11	alpha/beta hydrolase domain-containing protein 11 isoform 8		84		0.25		0.77828	0	3	0	3	0	10.8		GGAEPRPLPLSYR,TNFNSIAK,VLTVDAR
P62917	RPL8	60S ribosomal protein L8		106		0.25		0.77828	0	2	0	2	0	7		AVVGVVAGGGR,AVDFAER
Q5SRD1	LINC00843,LOC100652748,TIMM23B	Putative mitochondrial import inner membrane translocase subunit Tim23B		71		0.25		0.4678	0	2	0	2	0	10.5		YLVQDTDEFILPTGANK,NVQILNMVTR
Q9UJ70-2	NAGK	N-acetyl-D-glucosamine kinase		158		0.25		0.2452	0	3	0	3	0	8.7		IVFDSIDNLEAAPHDIGYVK,KIAEGAQQGDPLSR,IAEGAQQGDPLSR
P68400	CSNK2A1	casein kinase II subunit alpha isoform a		171		0.24		0.89574	0	4	0	4	0	19.9		LIDWGLAEFYHPGQEYNVR,GGPNIITLADIVKDPVSR,VLGTEDLYDYIDKYNIELDPR,FVHSENQHLVSPEALDFLDK
Q9Y4W6	AFG3L2	AFG3-like protein 2		247		0.24		0.4678	0	8	0	8	0	11.5		QGDMVLEKPYSEATAR,VGQISFDLPR,KNAPCILFIDEIDAVGR,KTQVLQPEEK,GMGGLFSVGETTAK,DLFALAR,QIFIGPPDIK,HFEQAIER
Q9NZL4-3	HSPBP1	Isoform 3 of Hsp70-binding protein 1		130		0.24		0.4678	0	3	0	3	0	8.1		LDGFSVLMR,ECREPELGLEELLR,YLEAGAAGLR
P36871	PGM1	Phosphoglucomutase-1 isoform 1		212		0.23		0.69267	0	7	0	7	0	14.5		SIFDFSALK,SGEHDFGAAFDGDGDRNMILGK,QQFDLENK,DLEALMFDR,IAAANGIGR,QFSANDKVYTVEK,QEATLVVGGDGR
P33993-3	MCM7	DNA replication licensing factor MCM7 isoform 2		142		0.23		0.43301	0	4	0	4	0	9.3		QVVQGLLSETYLEAHR,TLLAILR,MVDVVEKEDVNEAIR,TQRPADVIFATVR
P22102-2	GART	trifunctional purine biosynthetic protein adenosine-3 isoform 2		87		0.23		0.36887	0	3	0	3	0	11.3		SAGVQCFGPTAEAAQLESSKR,ISNTAISISDHTALAQFCK,AVQEIMQEK
P09012	SNRPA	U1 SMALL NUCLEAR RIBONUCLEOPROTEIN A		102		0.22		0.77828	0	3	0	3	0	10.9		TDSDIIAK,SMQGFPFYDKPMR,EVSSATNALR
O75817	POP7	Ribonuclease P protein subunit p20		92		0.22		0.58489	0	2	0	2	0	11.4		GAVEAELDPVEYTLR,GAVEAELDPVEYTLRK
P50914	RPL14	60S ribosomal protein L14		114.5		0.22		0.47983	0	4	0	4	0	14.4		IIKNEVK,LVAIVDVIDQNR,ALVDGPCTQVR,ALVDGPCTQVRR
Q9Y316-2	MEMO1	protein MEMO1 isoform 2		105		0.22		0.31113	0	2	0	2	0	7.2		TPLYDLR,YSYYDESQGEIYR
O94760	DDAH1	N(G),N(G)-dimethylarginine dimethylaminohydrolase 1 isoform 1		88		0.22		0.29155	0	2	0	2	0	7.3		SAKGEEVDVAR,TPEEYPESAK
P43034	PAFAH1B1	Platelet-activating factor acetylhydrolase IB subunit alpha		117		0.22		0.29155	0	3	0	3	0	8		AIADYLR,LWDFQGFECIR,TAPYVVTGSVDQTVK
Q9BSH4	TACO1	Translational activator of cytochrome c oxidase 1		96		0.21		0.77828	0	3	0	3	0	19.5		ALEMAIEAGAEDVKETEDEEERNVFK,FICDASSLHQVR,EGGPNPEHNSNLANILEVCR
P36542-2	ATP5C1	ATP synthase subunit gamma, mitochondrial isoform H (heart) precursor		114		0.21		0.70125	0	2	0	2	0	9		NASEMIDKLTLTFNR,IYGLGSLALYEK
P30519-2	HMOX2	heme oxygenase 2 isoform c		58		0.21		0.33352	0	2	0	2	0	7.6		YMGDLSGGQVLKK,MADLSELLK
Q9Y314	NOSIP	nitric oxide synthase-interacting protein		56		0.21		0.33352	0	2	0	2	0	9.6		GGTGFAGSGVK,MSDLTPVHFTPLDSSVDR
Q6FI81-3	CIAPIN1	anamorsin isoform 2		61		0.21		0.27427	0	2	0	2	0	9		ELQREPLTPEEVQSVR,VLLSDSNLHDA
Q9BVA1	TUBB2B	Tubulin beta-2B chain		124		0.21		0.25893	0	3	0	2	0	5.6		ISEQFTAMFR,AILVDLEPGTMDSVR
P67936-2	TPM4	tropomyosin alpha-4 chain isoform Tpm4.1cy		58		0.21		0.1053	0	2	0	2	0	7.3		LLSDKLK,IQLVEEELDRAQER
P55735-2	SEC13	protein SEC13 homolog isoform 2		105		0.2		0.77828	0	3	0	3	0	14.6		FASGGCDNLIK,DVAWAPSIGLPTSTIASCSQDGR,NGGQILIADLR
P62158	CALM3,CALM2,CALM1	Calmodulin		74		0.2		0.6681	0	2	0	2	0	15.4		ELGTVMR,VFDKDGNGYISAAELR
Q14232	EIF2B1	Translation initiation factor eIF-2B subunit alpha		102		0.2		0.50131	0	3	0	3	0	14.4		SQMKEDPDMASAVAAIR,IGTNQMAVCAK,FSVYVTESQPDLSGKK
Q8N2F6-2	ARMC10	Armadillo repeat-containing protein 10 isoform b		53		0.2		0.4678	0	2	0	2	0	7.4		VVTIIPK,LLYLLESTEDPVIIER
Q96C36	PYCR2	pyrroline-5-carboxylate reductase 2 isoform 1		112		0.2		0.4678	0	2	0	2	0	7.1		SLLINAVEASCIR,ELQSMADQEK
P31942-2	HNRNPH3	heterogeneous nuclear ribonucleoprotein H3 isoform b		132		0.2		0.43845	0	3	0	3	0	10.5		EIAENALGK,DGMDNQGGYGSVGR,STGEAFVQFASK
Q9Y6I9	TEX264	testis-expressed sequence 264 protein isoform 1 precursor		73		0.2		0.4251	0	2	0	2	0	7.9		ETSAATLSPGASSR,LFTESCSISPK
Q15102	PAFAH1B3	Platelet-activating factor acetylhydrolase IB subunit gamma		70		0.2		0.3895	0	3	0	3	0	14.7		LGYTPVCR,VVVLGLLPR,LLAQDQGQGAPLLEPAP
P30085-2	CMPK1	Isoform 2 of UMP-CMP kinase		72		0.2		0.3895	0	2	0	2	0	6.8		FLIDGFPR,NKFLIDGFPR
O00232	PSMD12	26S proteasome non-ATPase regulatory subunit 12 isoform 1		135		0.2		0.37382	0	4	0	4	0	8.5		WSTLVEDYGMELR,IYVEIER,TASDMVSTSR,FFQEENTEK
Q99456	KRT12	Keratin, type I cytoskeletal 12		145		0.2		0.18597	0	5	0	5	0	4.8		DPTKTRK,SEVTDLR,SEVTDLRR,LASYLDKVR,LASYLDK
P62750	RPL23A	60S ribosomal protein L23a		58		0.19		0.77828	0	2	0	2	0	15.3		EAPAPPKAEAK,LAPDYDALDVANK
P47914	RPL29	60S ribosomal protein L29		72		0.19		0.77828	0	2	0	2	0	10		AQAAAPASVPAQAPKR,AQAAAPASVPAQAPK
P49419-2	ALDH7A1	alpha-aminoadipic semialdehyde dehydrogenase isoform 2		173		0.19		0.58489	0	5	0	5	0	9.5		QGLSSSIFTK,GAPTTSLISVAVTK,QIGDALR,IWADIPAPK,DLPLAQGIK
P43490	NAMPT	nicotinamide phosphoribosyltransferase precursor		143		0.19		0.50859	0	5	0	5	0	11.4		YDGHLPIEIK,AVPEGFVIPR,GWNYILEK,STQAPLIIRPDSGNPLDTVLK,VLEILGK
O00757	FBP2	fructose-1,6-bisphosphatase isozyme 2		71		0.19		0.4251	0	2	0	2	0	6.1		YVGSMVADVHR,IYSLNEGYAK
Q14166	TTLL12	Tubulin--tyrosine ligase-like protein 12		145		0.19		0.34596	0	4	0	4	0	9.4		YIESPVLFLR,DFAYGETDPLIR,SSPGQTPEEGAQALAEFAALHGPALR,TELPQFVSYFQQR
Q9NRN7	AASDHPPT	L-aminoadipate-semialdehyde dehydrogenase-phosphopantetheinyl transferase		115		0.19		0.33352	0	2	0	2	0	7.4		HQDVPSQDDSKPTQR,IGQFVFAR
O00151	PDLIM1	PDZ and LIM domain protein 1		67		0.19		0.31113	0	2	0	2	0	9.4		LVGGKDFEQPLAISR,SAMPFTASPASSTTAR
Q15257-2	PPP2R4	serine/threonine-protein phosphatase 2A activator isoform b		85		0.19		0.29155	0	2	0	2	0	5.2		VNQGLIR,VDDQIAIVFK
Q9NT62-2	ATG3	ubiquitin-like-conjugating enzyme ATG3 isoform 2		72		0.19		0.16591	0	2	0	2	0	5.1		ALEVAEYLTPVLKESK,ALEVAEYLTPVLK
O43175	PHGDH	D-3-phosphoglycerate dehydrogenase		160		0.18		0.55052	0	4	0	4	0	7.8		AGTGVDNVDLEAATR,MAFANLR,GGIVDEGALLR,TLGILGLGR
Q92890-1	UFD1	Isoform Long of Ubiquitin fusion degradation protein 1 homolog		101		0.18		0.50131	0	3	0	3	0	12.8		AVLENALR,FVAFSGEGQSLR,QVQHEESTEGEADHSGYAGELGFR
P43243	MATR3	Matrin-3 isoform a		254		0.18		0.45476	0	6	0	6	0	11		IGPYQPNVPVGIDYVIPK,DSFDDRGPSLNPVLDYDHGSR,VVHIMDFQR,GNLGAGNGNLQGPR,VIHLSNLPHSGYSDSAVLK,LCSLFYTNEEVAK
O95433	AHSA1	activator of 90 kDa heat shock protein ATPase homolog 1		76		0.18		0.36887	0	3	0	3	0	7.6		QTFGYGAR,EAMGIYISTLK,WGEGDPR
Q3KQV9	UAP1L1	UDP-N-acetylhexosamine pyrophosphorylase-like protein 1		118		0.18		0.35936	0	3	0	3	0	6.5		FVFDVFR,RVEQLAGER,NFAALEVLREEEFSPLK
Q9UJU6-4	DBNL	drebrin-like protein isoform e		114		0.18		0.33352	0	2	0	2	0	8		TWEQQQEVVSR,FQDVGPQAPVGSVYQK
Q5T440	IBA57	putative transferase CAF17, mitochondrial isoform 1 precursor		57		0.18		0.33352	0	2	0	2	0	7.5		LLTQDEGPALVPGGR,AGAAAILIRDPR
P27361-2	MAPK3	mitogen-activated protein kinase 3 isoform 3		70		0.18		0.25893	0	2	0	2	0	5.6		ICDFGLAR,LKELIFQETAR
P54577	YARS	Tyrosine--tRNA ligase, cytoplasmic		145		0.18		0.17427	0	3	0	3	0	7.9		NSEPEEVIPSR,QVEPLDPPAGSAPGEHVFVK,VDAQFGGIDQR
Q13126-2	MTAP	Methylthioadenosine phosphorylase		82		0.18		0.11034	0	2	0	2	0	6		IGIIGGTGLDDPEILEGRTEK,IGIIGGTGLDDPEILEGR
P56192	MARS	Methionine--tRNA ligase, cytoplasmic		295		0.17		0.58489	0	8	0	8	0	10.5		IKGSEADRQR,GFVLQDTVEQLR,LINAVELK,LRQWNTLYLCGTDEYGTATETK,QPQPSPAEGR,TLPGSDWTPNAQFITR,SILTISR,LENDQIESLR
P55786	NPEPPS	puromycin-sensitive aminopeptidase		271		0.17		0.56911	0	9	0	9	0	12.1		FALEVAAK,DAESIHQYLLQR,SKYTTPSGEVR,QMGFPLIYVEAEQVEDDRLLR,VLGATLLPDLIQK,AFFESHPAPSAER,QILSADLR,YAAVTQFEATDARR,LGLQNDLFSLAR
O14787-2	TNPO2	Transportin-2 isoform 2		303		0.17		0.56152	0	6	0	6	0	6.5		FLQFFK,QSSFALLGDLTK,ALVMLLEVR,TLLENTAITIGR,DSQSPNTATQR,SLSGLILK
Q8NBF2-2	NHLRC2	NHLRC2 protein		50		0.17		0.4251	0	2	0	2	0	6.2		MVSVLPIFR,SENAVVDGPFLVEK
P17812-2	CTPS1	unnamed protein product		109		0.17		0.41254	0	3	0	3	0	7.7		FSDSYASVIK,IQAIAWAR,FVGQDVEGER
P46459	NSF	Vesicle-fusing ATPase		183		0.17		0.35936	0	5	0	5	0	8.1		YVGESEANIR,IAEESNFPFIK,GILLYGPPGCGK,NFSGAELEGLVR,FLALLREEGASPLDFD
Q9Y295	DRG1	developmentally-regulated GTP-binding protein 1		116		0.17		0.33352	0	3	0	3	0	8.9		IIENELEGFGIR,IGFVGFPSVGK,IAEIEAEMAR
O00442-2	RTCA	RNA 3'-terminal phosphate cyclase isoform a		74		0.17		0.29155	0	2	0	2	0	4.7		AFVAGVLPFK,GGGEVIVR
Q8TEX9-2	IPO4	Isoform 2 of Importin-4		187		0.17		0.27106	0	5	0	5	0	5.2		LAELCGVLK,LLPVLLSTAQEADPEVR,VVPSYMQAVNR,EVMPLLLAYLK,SLILTALQR
P82650	MRPS22	28S ribosomal protein S22, mitochondrial		65		0.17		0.21153	0	2	0	2	0	5.2		MIQVYFPK,DQAAEGINLIK
Q9H2U2-2	PPA2	Isoform 2 of Inorganic pyrophosphatase 2, mitochondrial		56		0.17		0.21153	0	2	0	2	0	5.1		GQPCSQNYR,YVANIFPYK
O75663-2	TIPRL	TIP41-like protein isoform 2		94		0.16		0.51991	0	2	0	2	0	16.2		VACAEEWQESR,IQHGSGFGIEFNATDALR
P51553-2	IDH3G	isocitrate dehydrogenase [NAD] subunit gamma, mitochondrial isoform b precursor		108		0.16		0.29155	0	2	0	2	0	8.9		ENTEGEYSSLEHESVAGVVESLK,LGDGLFLQCCR
O60506-2	SYNCRIP	heterogeneous nuclear ribonucleoprotein Q isoform 4		133		0.16		0.29155	0	3	0	3	0	5.1		AGPIWDLR,DSDLSHVQNK,TGYTLDVTTGQR
Q9NR30	DDX21	nucleolar RNA helicase 2 isoform 1		161		0.16		0.26638	0	4	0	4	0	6		IGVPSATEIIK,GVTFLFPIQAK,APQVLVLAPTR,KKAEPSEVDMNSPK
P04899-4	GNAI2	Galphai2 protein		72		0.16		0.25893	0	2	0	2	0	7.1		LLLLGAGESGK,IAQSDYIPTQQDVLR
P49721	PSMB2	proteasome subunit beta type-2 isoform 1		53		0.15		0.51991	0	2	0	2	0	12.4		IIDKNGIHDLDNISFPK,RNLADCLR
Q13363-2	CTBP1	C-terminal-binding protein 1 isoform 2		99		0.15		0.50131	0	3	0	3	0	6		ALAQALKEGR,VQSVEQIR,VGQAVALR
P61160	ACTR2	Actin-related protein 2 isoform b		113		0.15		0.4678	0	3	0	3	0	7.8		ILLTEPPMNPTK,VGNIEIK,VGNIEIKDLMVGDEASELR
P27694	RPA1	Replication protein A 70 kDa DNA-binding subunit		90		0.15		0.44974	0	4	0	4	0	9.5		VVILMELEVLK,AAGPSLSHTSGGTQSK,VVPIASLTPYQSK,ATAFNEQVDKFFPLIEVNK
P48735-2	IDH2	isocitrate dehydrogenase [NADP], mitochondrial isoform 2		154		0.15		0.44544	0	4	0	4	0	10		FAQMLEK,VCVETVESGAMTK,LIDDMVAQVLK,NILGGTVFR
P04626-4	ERBB2	receptor tyrosine-protein kinase erbB-2 isoform c		226		0.15		0.37891	0	6	0	6	0	5.7		VLGSGAFGTVYK,WMALESILR,VCYGLGMEHLR,GMSYLEDVR,FVVIQNEDLGPASPLDSTFYR,GQECVEECR
P62495-2	ETF1	eukaryotic peptide chain release factor subunit 1 isoform 2		85		0.15		0.36887	0	2	0	2	0	7.4		GFGGIGGILR,FGATLEIVTDKSQEGSQFVK
Q9Y383-2	LUC7L2	Putative RNA-binding protein Luc7-like 2 isoform 4		108		0.15		0.29155	0	3	0	3	0	6.6		NSMPASSFQQQK,ADYEIASK,NQERLK
P52566	ARHGDIB	Rho GDP-dissociation inhibitor 2		45		0.15		0.28413	0	2	0	2	0	10.4		TLLGDGPVVTDPKAPNVVVTR,TLLGDGPVVTDPK
Q9Y508-2	RNF114	unnamed protein product		55		0.15		0.28413	0	3	0	2	0	9.9		ATIKDASLQPR,SALAPGVR
P07476	IVL	Involucrin		121		0.15		0.22528	0	3	0	3	0	5.8		HLVQQEGQLEQQER,HLEEQEGQLK,HLEQQEGQPK
Q14344	GNA13	guanine nucleotide-binding protein subunit alpha-13 isoform 1		98		0.15		0.22168	0	2	0	2	0	6.1		APMAAQGMVETR,ILLLGAGESGK
Q99447-3	PCYT2	ethanolamine-phosphate cytidylyltransferase isoform 1		98		0.15		0.22168	0	2	0	2	0	5.6		ELAFLEAAR,GAAGGAEQPGPGGR
O95716	RAB3D	ras-related protein Rab-3D		106		0.14		0.84785	0	3	0	3	0	18.2		LADDLGFEFFEASAKENINVK,TITTAYYR,LQIWDTAGQER
Q7Z7H5-2	TMED4	unnamed protein product		60.5		0.14		0.51369	0	2	0	2	0	16.1		CFIEEIPDETMVIGNYR,QLLDQVEQIQKEQDYQR
P19388	POLR2E	DNA-directed RNA polymerases I, II, and III subunit RPABC1		97		0.14		0.4678	0	2	0	2	0	10.4		ALIVVQQGMTPSAK,MQEENITR
P40429	RPL13A	60S ribosomal protein L13a isoform 1		48		0.14		0.4678	0	2	0	2	0	8.3		MVVPAALK,GQAALDRLK
Q9HCN8	SDF2L1	stromal cell-derived factor 2-like protein 1 precursor		66		0.14		0.4678	0	2	0	2	0	14		IRGGSEGGCPR,AMEGIFIKPSVEPSAGHDEL
P57735	RAB25	ras-related protein Rab-25		64		0.14		0.3895	0	2	0	2	0	8.9		AQIWDTAGLER,AITSAYYR
Q9Y6E0-2	STK24	serine/threonine-protein kinase 24 isoform b precursor		72		0.14		0.3895	0	3	0	3	0	8.1		LADFGVAGQLTDTQIKR,YSLSGGGTSSH,VLFLIPK
Q07812-2	BAX	apoptosis regulator BAX isoform beta		70		0.14		0.35936	0	2	0	2	0	13.3		MIAAVDTDSPREVFFR,IGDELDSNMELQR
Q9UNN5	FAF1	fas-associated factor 1		125		0.14		0.30432	0	3	0	3	0	5.3		NVYDLTSIPVR,TGDVEDSTVLK,LFPQETLFLEAKE
Q15067-2	ACOX1	peroxisomal acyl-coenzyme A oxidase 1 isoform a		129		0.14		0.25893	0	3	0	3	0	9.2		INEGIGQGDLSELPELHALTAGLK,DSASFNPELLTHILDGSPEK,YAQVKPDGTYVKPLSNK
P34932	HSPA4	Heat shock 70 kDa protein 4		168.5		0.14		0.25319	0	9	0	9	0	11		MIMQDKLEK,SVLEQTK,LKKEDIYAVEIVGGATR,MDQPPQAK,VLATAFDTTLGGR,ELSTTLNADEAVTR,NHAAPFSK,LFEELGK,QSLTMDPVVK
P14136-2	GFAP	glial fibrillary acidic protein isoform 3		128		0.14		0.24094	0	3	0	3	0	6.3		LALDIEIATYR,KIESLEEEIR,FLEQQNK
Q6ZU15	SEPT14	Septin-14		60		0.14		0.12884	0	2	0	2	0	3.9		QRFMQRVK,VNIIPLIAK
P27635	RPL10	60S ribosomal protein L10		73		0.13		0.87382	0	3	0	3	0	27.1		MLSCAGADRLQTGMR,FNADEFEDMVAEKR,AKVDEFPLCGHMVSDEYEQLSSEALEAAR
P30042-2	LOC102724023	Isoform Short of ES1 protein homolog, mitochondrial		51		0.13		0.77828	0	2	0	2	0	10.1		GQPSEGESRNVLTESAR,VLELTGK
P54578-2	USP14	ubiquitin carboxyl-terminal hydrolase 14 isoform b		135		0.13		0.4251	0	3	0	3	0	9.1		RVEIMEEESEQ,YLFTGLK,LEAIEDDSVKETDSSSASAATPSK
P12955-2	PEPD	xaa-Pro dipeptidase isoform 2		61		0.13		0.33352	0	2	0	2	0	4.6		GVNTDSGSVCR,VPLALFALNR
Q16576-2	RBBP7	histone-binding protein RBBP7 isoform 1		108		0.13		0.31113	0	3	0	3	0	9.1		IGEEQSAEDAEDGPPELLFIHGGHTAK,LNVWDLSK,TVALWDLR
P30520	ADSS	adenylosuccinate synthetase isozyme 2		54		0.13		0.21153	0	2	0	2	0	7		FIEDELQIPVK,VGIGAFPTEQDNEIGELLQTR
Q96RQ3	MCCC1	methylcrotonoyl-CoA carboxylase subunit alpha, mitochondrial isoform 1 precursor		107		0.13		0.20526	0	3	0	3	0	4.2		EGSIEIDIPVPK,LVVWAADR,IIEEAPAPGIK
P52888	THOP1	thimet oligopeptidase		132		0.13		0.20526	0	3	0	3	0	5.3		QANTGLFNLR,FYLDLYPR,VDQALHTQTDADPAEEYAR
Q99615-2	DNAJC7	dnaJ homolog subfamily C member 7 isoform 2		84		0.13		0.1721	0	2	0	2	0	4.5		EALGDAQQSVR,NAQAQQEFK
P60228	EIF3E	Eukaryotic translation initiation factor 3 subunit E		61		0.13		0.16591	0	2	0	2	0	4		LFIFETFCR,NALSSLWGK
Q8TC12-3	RDH11	retinol dehydrogenase 11 isoform 2 precursor		61		0.12		0.51991	0	2	0	2	0	12.5		VVVVTGANTGIGKETAK,EIQTTTGNQQVLVR
Q96EY8	MMAB	cob(I)yrinic acid a,c-diamide adenosyltransferase, mitochondrial precursor		68		0.12		0.4678	0	2	0	2	0	9.6		LSDYLFTLAR,TGDKGFSSTFTGER
P55036-2	PSMD4	proteasome (prosome, macropain) 26S subunit, non-ATPase, 4, isoform CRA_c		70		0.12		0.4678	0	2	0	2	0	10.8		IIAFVGSPVEDNEKDLVK,LTAFVNTLNGK
Q7L2H7-2	EIF3M	eukaryotic translation initiation factor 3 subunit M isoform 2		63		0.12		0.4251	0	2	0	2	0	7.8		LLYEALVDCK,NSLLSLSDT
Q9Y224	C14orf166	UPF0568 protein C14orf166		64		0.12		0.29155	0	2	0	2	0	7.3		LTQDAVAK,NFIVWLEDQK
P49589-2	CARS	cysteine--tRNA ligase, cytoplasmic isoform a		108		0.12		0.26638	0	4	0	4	0	6.4		LVPEAVGDQK,VSEYVPEIVNFVQK,IQHAVQLATEPLEK,SPNDFALWK
Q13098-5	GPS1	PREDICTED: COP9 signalosome complex subunit 1 isoform X17		80		0.12		0.25893	0	2	0	2	0	4.3		DSQTQAILTK,AESTPEIAEQR
P62753	RPS6	40S RIBOSOMAL PROTEIN S6		36		0.12		0.23285	0	2	0	2	0	7.2		NKEEAAEYAK,LIEVDDER
Q15436	SEC23A	protein transport protein Sec23A		124		0.12		0.21819	0	3	0	3	0	4.4		AVLNPLCQVDYR,GPQVQQPPPSNR,FSWNVWPSSR
P30566	ADSL	Adenylosuccinate lyase isoform A		60		0.12		0.21153	0	2	0	2	0	4.1		NALDLLLPK,QEGGDNDLIER
P15313	ATP6V1B1	V-type proton ATPase subunit B, kidney isoform		82		0.12		0.20226	0	2	0	2	0	4.8		TPVSEDMLGR,AIVQVFEGTSGIDAR
P49368-2	CCT3	T-complex protein 1 subunit gamma isoform c		95		0.12		0.16016	0	2	0	2	0	4.3		AVAQALEVIPR,IVLLDSSLEYK
Q15274	QPRT	nicotinate-nucleotide pyrophosphorylase [carboxylating]		78		0.11		0.51991	0	2	0	2	0	9		GPAHCLLLGER,CSGIASAAAAAVEAAR
Q99829	CPNE1	copine-1 isoform a		85		0.11		0.29155	0	2	0	2	0	4.2		GTITVSAQELKDNR,VVTMEVEAR
Q86UE4	MTDH	protein LYRIC		80		0.11		0.21153	0	2	0	2	0	3.2		TVEVAEGEAVR,TVEVAEGEAVRTPQSVTAK
Q93009-3	USP7	unnamed protein product		176		0.11		0.20051	0	5	0	5	0	6		LLEIVSYK,AGFIQDTSLILYEEVKPNLTER,FDDDVVSR,IIGVHQEDELLECLSPATSR,KAVELGEK
Q6IN85-2	SMEK1	serine/threonine-protein phosphatase 4 regulatory subunit 3A isoform 1		129		0.11		0.1885	0	3	0	3	0	3.9		AESDGSLLLESK,NTSQTAAITTK,SFLFEPVVK
O95394-3	PGM3	phosphoacetylglucosamine mutase isoform 4		77		0.11		0.18597	0	2	0	2	0	3		MGLLAVLR,VISTTDAER
Q8IUC4-2	RHPN2	unnamed protein product		58		0.11		0.16016	0	2	0	2	0	3.1		LTVTDFFQK,VLCAAQER
O43819	SCO2	protein SCO2 homolog, mitochondrial precursor		62		0.11		0.13646	0	2	0	2	0	4.1		SAEQISDSVRR,SAEQISDSVR
O00429-2	DNM1L	dynamin-1-like protein isoform 4		110.5		0.105		0.18691	0	6	0	5	0	8		SVTDSIRDEYAFLQK,LGIIGVVNR,YIETSELCGGAR,TSKAEELLAEEK,SSVLESLVGR
Q8NCW5	APOA1BP	NAD(P)H-hydrate epimerase precursor		99		0.1		0.58489	0	3	0	3	0	14.2		KSATQFTGR,AYPPTSMSR,SPPTVLVICGPGNNGGDGLVCAR
O00743-2	PPP6C	serine/threonine-protein phosphatase 6 catalytic subunit isoform c		68		0.1		0.50131	0	2	0	2	0	7.7		GAGWLFGAK,APLDLDKYVEIAR
Q96DB5-2	FAM82B,RMDN1	regulator of microtubule dynamics protein 1 isoform 3		99		0.1		0.4678	0	4	0	3	0	11.9		AEQVDPNFYSK,MLFATPPSSTYEK,ASRDVAQLSR
P00387-2	CYB5R3	NADH-cytochrome b5 reductase 3 isoform 2		98		0.1		0.4251	0	2	0	2	0	8.2		LIDREIISHDTR,GPSGLLVYQGK
Q01844-3	EWSR1	RNA-binding protein EWS isoform 3		110.5		0.1		0.35936	0	2	0	2	0	5.8		GDATVSYEDPPTAK,QDHPSSMGVYGQESGGFSGPGENR
Q9Y262	EIF3L	eukaryotic translation initiation factor 3 subunit L isoform 1		178		0.1		0.33352	0	4	0	4	0	8.5		VFSDEVQQQAQLSTIR,VSGGPSLEQR,LAGFLDLTEQEFR,TVSDLIDQK
O94826	TOMM70A	Mitochondrial import receptor subunit TOM70		74		0.1		0.29778	0	5	0	5	0	11		QAYTGNNSSQIQAAMKGFEEVIK,SYFSSFTDDIISQPMLK,LRPESALAQAQK,AVELNPK,GLLQLQWK
P21912	SDHB	succinate dehydrogenase [ubiquinone] iron-sulfur subunit, mitochondrial precursor		71		0.1		0.27427	0	2	0	2	0	6		LQDPFSLYR,RIDTNLNK
O94906-2	PRPF6	chromosome 20 open reading frame 14, isoform CRA_c		206		0.1		0.26896	0	6	0	6	0	6.3		AAVELEEPEDAR,AAELETDIR,AEVLWLMGAK,IQQQFSDLK,NPGLWLESVR,LEEVTGK
P36915	GNL1	Guanine nucleotide-binding protein-like 1		70		0.1		0.25893	0	3	0	3	0	4.9		ALGPEQLLR,LNQQPSQGLGPR,ACEAITVGK
A0FGR8-2	ESYT2	Extended synaptotagmin-2		185		0.1		0.23886	0	4	0	4	0	5.8		LLDEWFTLDEVPKGK,GEGPEAGAGGAGGR,FQLSNSGPNSTIK,ALALLEDEER
Q00169	PITPNA	Phosphatidylinositol transfer protein alpha isoform		46		0.1		0.22168	0	2	0	2	0	8.1		AWNAYPYCR,MLAPEGALNIHEK
Q86V21-2	AACS	PREDICTED: acetoacetyl-CoA synthetase isoform X2		67		0.1		0.1721	0	2	0	2	0	3.1		GIADVPEWFK,LNYAENLLR
Q06787-2	FMR1	fragile X mental retardation 1 isoform C, partial		74		0.1		0.14505	0	2	0	2	0	3.5		ENSTHFSQPNSTK,LQIDEQLR
O76031	CLPX	ATP-dependent Clp protease ATP-binding subunit clpX-like, mitochondrial precursor		96		0.1		0.12884	0	2	0	2	0	3.9		SGESNTHQDIEEKDR,TLVQILTEPR
Q9BXJ9	NAA15	N-alpha-acetyltransferase 15, NatA auxiliary subunit		139		0.1		0.12648	0	3	0	3	0	3.9		AIELATTLDESLTNR,LFNTAVCESK,LEDAADVYR
P10619-2	CTSA	Isoform 2 of Lysosomal protective protein		58.5		0.095		0.21401	0	3	0	3	0	7.5		CNFYDNKDLECVTNLQEVAR,SMNSQYLK,FLNKQPY
O75208	COQ9	Ubiquinone biosynthesis protein COQ9, mitochondrial precursor		89		0.09		0.51991	0	2	0	2	0	9.4		LVQLGQAEK,YTDQGGEEEEDYESEEQLQHR
Q00577	PURA	Transcriptional activator protein Pur-alpha		41		0.09		0.3895	0	2	0	2	0	9.6		RVDIQNKR,GPGLGSTQGQTIALPAQGLIEFR
Q15758-2	SLC1A5	neutral amino acid transporter B(0) isoform 3		35		0.09		0.33352	0	2	0	2	0	5.8		STEPELIQVK,CVEENNGVAK
Q96AG4	LRRC59	Leucine-rich repeat-containing protein 59		52		0.09		0.31113	0	2	0	2	0	8.1		LQQLPADFGR,WLDLKDNPLDPVLAK
P39748-2	FEN1	Isoform FENMIT of Flap endonuclease 1		80		0.09		0.29155	0	2	0	2	0	8.8		EAHQLFLEPEVLDPESVELK,RAVDLIQK
Q9H9J2	MRPL44	39S ribosomal protein L44, mitochondrial		63		0.09		0.27427	0	2	0	2	0	9		LQENFSLDLLK,LIAEGPGETVLVAEEEAAR
Q08379-2	GOLGA2	golgin-95		102		0.09		0.22528	0	3	0	3	0	4.8		LLELQELVLR,GESAMWRQR,SQEAQSLQQQR
P42166	TMPO	Thymopoietin isoform alpha		129		0.09		0.20526	0	3	0	3	0	6.9		PEFLEDPSVLTK,QEDKDDLDVTELTNEDLLDQLVK,YGVNPGPIVGTTR
O94776	MTA2	Metastasis-associated protein MTA2		55		0.09		0.16999	0	2	0	2	0	3.8		EFEEESKQPGVSEQQR,QIDQFLVVAR
Q969N2-3	PIGT	Hypothetical protein		77		0.08		0.50131	0	3	0	3	0	6.2		VSIQFER,KLLPCSSK,AGLSVLLK
O96019-2	ACTL6A	actin-like protein 6A isoform 2		54		0.08		0.35936	0	2	0	2	0	5.9		LIANNTTVER,SPLAGDFITMQCR
P61421	ATP6V0D1	V-type proton ATPase subunit d 1		79		0.08		0.33352	0	2	0	2	0	6.8		LLFEGAGSNPGDK,LYPEGLAQLAR
O43488	AKR7A2	aflatoxin B1 aldehyde reductase member 2		102		0.08		0.31113	0	3	0	3	0	6.6		MDAPASAAAVR,VASVLGTMEMGR,RMDAPASAAAVR
P78406	RAE1	mRNA export factor		58.5		0.08		0.22809	0	3	0	3	0	11.9		NAAEELKPR,GLIVYQLENQPSEFR,MWDLSSNQAIQIAQHDAPVK
Q8IZ83-3	ALDH16A1	aldehyde dehydrogenase family 16 member A1 isoform 2		56		0.08		0.21153	0	2	0	2	0	2.7		GLDGAVDMGAR,GAAACDLVQR
Q9H6S3-3	EPS8L2	Eps8l2 protein		66		0.08		0.21153	0	3	0	3	0	4.2		KAPAEGVLTLR,DAVDFLR,VGPQVPLSEPGFR
Q15738	NSDHL	sterol-4-alpha-carboxylate 3-dehydrogenase, decarboxylating		53		0.08		0.21153	0	2	0	2	0	4.5		VNQNQAKR,FFLGDLCSR
Q70J99-3	UNC13D	Isoform 3 of Protein unc-13 homolog D		102		0.08		0.15478	0	3	0	3	0	2.8		TYNEALAR,AVQMDELVPLGELTK,HTIPEEETHR
Q9NQX3-2	GPHN	gephyrin isoform 1		91		0.08		0.12884	0	2	0	2	0	3.3		DTASLSTTPSESPR,VGVLTVSDSCFR
Q32MZ4-2	LRRFIP1	leucine-rich repeat flightless-interacting protein 1 isoform 4		119		0.08		0.12884	0	2	0	2	0	3.4		SAVEAQNEVTENPK,IDGATQSSPAEPK
O60568	PLOD3	procollagen-lysine,2-oxoglutarate 5-dioxygenase 3 precursor		65		0.08		0.12534	0	2	0	2	0	2.7		GLDYEGGGCR,SEDYVELVQR
P42285	SKIV2L2	Superkiller viralicidic activity 2-like 2		82		0.08		0.090777	0	3	0	2	0	2.5		IEESITEDLSLADLMPR,GIVILMVDEK
P50395-2	GDI2	rab GDP dissociation inhibitor beta isoform 2		113		0.07		0.4678	0	4	0	4	0	10.2		GRDWNVDLIPK,TFEGIDPK,DLGTESQIFISR,IKLYSESLAR
O60701-3	UGDH	UDP-glucose 6-dehydrogenase isoform 3		68		0.07		0.25893	0	2	0	2	0	5		YIEACAR,ILTTNTWSSELSK
Q9NR50-2	EIF2B3	translation initiation factor eIF-2B subunit gamma isoform 2		56		0.07		0.2452	0	2	0	2	0	7.2		SLDIYSFIK,LLSALCPEEPPVHSSAQIVSK
Q9NR46-2	SH3GLB2	endophilin-B2 isoform a		60		0.07		0.2452	0	2	0	2	0	3.9		AVQFTEEK,VAQTEFDR
P22059	OSBP	Oxysterol-binding protein 1		116		0.07		0.23285	0	3	0	3	0	5.3		VQPVIGENGGDAR,TSKPFNPLLGETFELDRLEENGYR,ALWFER
Q9UNH7	SNX6	Sorting nexin-6		47		0.07		0.22168	0	2	0	2	0	5.4		VSADEDLKLSDLLK,QNEFSVVR
Q99523	SORT1	sortilin isoform 1 preproprotein		87		0.07		0.16016	0	2	0	2	0	2.6		VVLTAEVSGGSR,ADLGALELWR
O43286	B4GALT5	Beta-1,4-galactosyltransferase 5		45		0.07		0.14505	0	2	0	2	0	4.1		VAILIPFR,RGLLRLPR
Q658Y4	FAM91A1	Protein FAM91A1		78		0.07		0.14062	0	2	0	2	0	2.2		QVVLYSIR,VQSTGEGEAQR
Q8IV36-2	HID1	PREDICTED: protein HID1 isoform X1		70		0.07		0.14062	0	2	0	2	0	2.1		TPEPLSR,SQVSEDGTLR
Q8NE71-2	ABCF1	ATP-binding cassette sub-family F member 1 isoform b		56		0.07		0.13254	0	2	0	2	0	3.4		LQGQLEQGDDTAAERLEK,GFNLPYQDAR
Q15155	NOMO1	nodal modulator 1 precursor		92		0.07		0.1199	0	3	0	3	0	3.7		ALGQAASDNSGPEDAKR,IQSTVTQPGGK,VIEVGNNDIDDVNIIVFR
O75582	RPS6KA5	ribosomal protein S6 kinase alpha-5 isoform a		61		0.07		0.11887	0	2	0	2	0	3.3		DLKPENLLFTDENDNLEIK,IIDFGFAR
Q9ULA0	DNPEP	Aspartyl aminopeptidase		76		0.06		0.3895	0	3	0	3	0	6.7		VKVPLQDLMVR,QVAMNGKAR,SPSPFHAVAECR
Q6P1M3-2	LLGL2	lethal(2) giant larvae protein homolog 2 isoform a		110		0.06		0.25188	0	4	0	4	0	4		ALLSDER,FWDASGVCLR,AERPGLQNMELAPVQR,LTALEGSR
P47895	ALDH1A3	aldehyde dehydrogenase family 1 member A3 isoform 1		111		0.06		0.23285	0	2	0	2	0	4.1		VFVEEQVYSEFVR,VTLELGGK
P49189	ALDH9A1	4-trimethylaminobutyraldehyde dehydrogenase		54		0.06		0.21153	0	2	0	2	0	3.8		VEPADASGTEK,AFEPATGR
O75439	PMPCB	mitochondrial-processing peptidase subunit beta precursor		53		0.06		0.19378	0	2	0	2	0	5.3		IVLAAAGGVSHDELLDLAK,FTGSEIR
Q6KB66-3	KRT80	Hypothetical protein		97		0.06		0.17877	0	3	0	2	0	4.7		QLRKYQELMNVK,LALDIEIATYR
P22102	GART	Trifunctional purine biosynthetic protein adenosine-3 isoform 1		104		0.06		0.15832	0	3	0	3	0	2.5		EQTEQILR,AIAFLQQPR,AVQEIMQEK
O43615	TIMM44	Mitochondrial import inner membrane translocase subunit TIM44		50		0.06		0.15478	0	2	0	2	0	5		IKEGVEEAAK,LLDISASSTEQIL
Q96HY7	DHTKD1	Probable 2-oxoglutarate dehydrogenase E1 component DHKTD1, mitochondrial		86		0.06		0.14976	0	2	0	2	0	2.1		SSLYCSDIGK,DVIIDLLCYR
Q7L014	DDX46	probable ATP-dependent RNA helicase DDX46 isoform 2		81		0.06		0.13646	0	3	0	3	0	3.6		GAEIIVCTPGR,LQNSYQPTNK,AGNKGYAYTFITEDQAR
O60825-2	PFKFB2	6-phosphofructo-2-kinase/fructose-2,6-bisphosphatase 2 isoform b		49		0.06		0.13646	0	2	0	2	0	4		VFNLGVYR,NRENVMEDFLK
Q9UQB8-2	BAIAP2	brain-specific angiogenesis inhibitor 1-associated protein 2 isoform 4		58		0.06		0.13254	0	2	0	2	0	4.3		TIMEQFNPSLR,MGELASESQGSK
O75369-2	FLNB	filamin-B isoform 4		251		0.06		0.12681	0	7	0	7	0	3.8		VLQSFTVDSSK,SPFTVGVAAPLDLSK,TFEMSDFIVDTR,VKVDPSHDASK,LVSPGSANETSSILVESVTR,AGPGTLSVTIEGPSK,FADEHVPGSPFTVK
Q92974-2	ARHGEF2	rho guanine nucleotide exchange factor 2 isoform 2		91		0.06		0.12202	0	3	0	3	0	2.3		ALVELLR,SPQEEALQR,LLQDAIR
O60231	DHX16	putative pre-mRNA-splicing factor ATP-dependent RNA helicase DHX16 isoform 1		94		0.06		0.0945	0	2	0	2	0	2.3		VLVASATMDTAR,FSTFFDDAPVFR
O94979-10	SEC31A	protein transport protein Sec31A isoform 7		69		0.055		0.1273	0	4	0	4	0	3.9		SCATFSSSHR,TTFEDLIQR,QVQHILASASPSGR,NPAVLSAASFDGR
Q9NRG9	AAAS	Aladin isoform 1		57		0.05		0.20226	0	2	0	2	0	3.2		FAVALLDDSVR,FSPVLGR
P42566-2	EPS15	Epidermal growth factor receptor substrate 15 isoform B		47		0.05		0.20226	0	2	0	2	0	3.4		ENTNLQK,TSEVQDLQDEVQRENTNLQK
Q8TAT6-2	NPLOC4	nuclear protein localization 4 homolog (S. cerevisiae), isoform CRA_b, partial		54		0.05		0.1721	0	2	0	2	0	2.9		FLDFWR,NKTGEITASSNK
Q969Z0	TBRG4	Protein TBRG4 isoform 1		51		0.05		0.1721	0	2	0	2	0	4.7		DVLLDVAYAYGK,LNFHPDQEDQFFSLVHEK
P08240-2	SRPR	signal recognition particle receptor subunit alpha isoform 2		48		0.05		0.16016	0	2	0	2	0	4.9		KEGSDGPLATSKPVPAEK,ALADHSMAQTPR
P08243-2	ASNS	asparagine synthetase [glutamine-hydrolyzing] isoform b		64		0.05		0.15478	0	2	0	2	0	4.4		EAFSDGITSVK,APSPEKAEEESER
Q8NBJ5	GLT25D1,COLGALT1	procollagen galactosyltransferase 1 precursor		47		0.05		0.13646	0	2	0	2	0	5.1		TPDKMGFDEVFMINLR,DVEREGLDWDLIYVGR
Q9Y2A7-2	NCKAP1	Nck-associated protein 1 isoform 2		98		0.05		0.13128	0	3	0	3	0	2.7		LQAYTSVSK,IGQETDKTTTR,NNNQQLAQLQK
Q9BTW9-4	TBCD	Isoform 4 of Tubulin-specific chaperone D		103		0.05		0.13128	0	3	0	3	0	2.4		ICQTVGVK,AASAAFQENVGR,LREVHGGGAER
O60264	SMARCA5	SWI/SNF-related matrix-associated actin-dependent regulator of chromatin subfamily A member 5		82		0.05		0.11397	0	3	0	3	0	3.1		ESEITDEDIDGILER,LVDQNLNK,FITDNTVEER
Q12768	KIAA0196	WASH complex subunit strumpellin		84		0.05		0.10218	0	3	0	3	0	2.7		FTPVDESVTFIGR,STGYSSQPGAK,VGQMQILR
P28340	POLD1	DNA polymerase delta catalytic subunit 1		80		0.05		0.074608	0	2	0	2	0	1.4		LLEQGIR,VAGLCSNIR
Q7L2E3-2	DHX30	Isoform 2 of Putative ATP-dependent RNA helicase DHX30		64		0.05		0.063327	0	2	0	2	0	1.3		ISAVSVAQR,IPQLLLER
Q9Y3T9	NOC2L	Nucleolar complex protein 2 homolog		59		0.04		0.17877	0	2	0	2	0	2.6		VQENSAYICSR,LSNVNLQEK
Q7Z4Q2	HEATR3	HEAT repeat-containing protein 3		59		0.04		0.16591	0	2	0	2	0	3		ETAAGALR,LGPLLLDPSLAVR
O43747-2	AP1G1	AP-1 complex subunit gamma-1 isoform a		50		0.04		0.13254	0	2	0	2	0	2.6		TVQTDHNAVQR,SSFREEDNTYR
Q8TE76-2	MORC4	MORC family CW-type zinc finger protein 4		47		0.04		0.11304	0	2	0	2	0	5.8		KMPMENENHQVFSNPPKILTVQEMAGLNNK,RTTEKLER
O15381-2	NVL	nuclear valosin-containing protein-like isoform 2		72		0.04		0.11304	0	2	0	2	0	4.1		EDLQEVDGEIEAVLQK,LGTEPTSETQDELQR
P35579	MYH9	Myosin-9		129		0.04		0.083384	0	4	0	4	0	2.9		VSHLLGINVTDFTR,EQADFAIEALAK,LQQELDDLLVDLDHQR,NTDQASMPDNTAAQK
Q14152-2	EIF3A	Isoform 2 of Eukaryotic translation initiation factor 3 subunit A		100.5		0.04		0.071837	0	6	0	6	0	4.7		LESLNIQR,LLLTPWVK,ASWRAEK,AFKDIDIEDLEELDPDFIMAK,NLTQDEMQR,LLDMDGIIVEK
Q5ST30-3	VARS2	valine--tRNA ligase, mitochondrial isoform 3		90		0.03		0.19935	0	3	0	3	0	4.2		TPSEGEAGTQR,SGDVIEYLLK,SGNLDPAELAIVAAAQKK
O43592	XPOT	Exportin-T		56		0.03		0.12202	0	2	0	2	0	2.3		QALMRNLLTPLMEK,ASALQDMMR
Q7L576-2	CYFIP1	cytoplasmic FMR1-interacting protein 1 isoform b		64		0.03		0.11588	0	2	0	2	0	2.6		LGTPQQIAIAR,TVLPFSQEFQR
Q05193-3	DNM1	dynamin-1 isoform 2		50		0.03		0.098541	0	2	0	2	0	1.9		KLQQYPR,GISPVPINLR
P78344-2	EIF4G2	eukaryotic translation initiation factor 4 gamma 2 isoform 2		62		0.03		0.098541	0	2	0	2	0	2.1		LQDEFENR,FSASSGGGGSR
Q9HD20-2	ATP13A1	ATPase type 13A1, isoform CRA_f		51		0.03		0.090777	0	2	0	2	0	1.6		VLALGYK,CTLVTTLQMFK
P49756	RBM25	RNA-binding protein 25		65		0.03		0.082637	0	2	0	2	0	2		GAIEVLIR,ERQEIEKER
Q9H2P0	ADNP	Activity-dependent neuroprotector homeobox protein		55		0.03		0.077105	0	2	0	2	0	1.7		KATMQGDR,SPSLSQSQASR
P46940	IQGAP1	Ras GTPase-activating-like protein IQGAP1		106		0.03		0.059254	0	3	0	3	0	3		FQPGETLTEILETPATSEQEAEHQR,LQQTYAALNSK,GVLLEIEDLQVNQFK
P07814	EPRS	Bifunctional glutamate/proline--tRNA ligase		73		0.02		0.092601	0	3	0	3	0	1.7		LNLNNTVLSK,VAVQGDVVR,IISLDAK
Q9HAV4	XPO5	exportin-5		53		0.02		0.084146	0	2	0	2	0	2		VLSDVDAFIAYVGTDQK,HACSSIIK
Q9UFD9	RIMBP3	RIMS-binding protein 3A		46		0.02		0.068	0	2	0	2	0	1.6		CRLQEVLAQLR,QRARDLSEQASAPLAK
Q92608	DOCK2	Dedicator of cytokinesis protein 2		55		0.02		0.050764	0	2	0	2	0	0.9		ELLEQK,MEECFKNLKMK
Q09666	AHNAK	Neuroblast differentiation-associated protein AHNAK isoform 1		96		0.02		0.02768	0	3	0	3	0	0.9		IKGDVPSVGLEGPDVDLQGPEAK,LKSEDGVEGDLGETQSR,ISAPNVDFNLEGPK
Q7Z406-2	MYH14	myosin-14 isoform 3		84		0.01		0.060818	0	3	0	3	0	1.6		EQADFALEALAK,KMQAQMK,NTDQATMPDNTAAQK
Q12802-2	AKAP13	A-kinase anchor protein 13 isoform 1		40		0.01		0.059254	0	2	0	2	0	1.2		DGSVFLK,NEETGTKSSGMPTDQESLSSGDAVLQR
P20930	FLG	Filaggrin		53		0.01		0.033934	0	2	0	2	0	0.5		AGHGHSADR,HSLVGQGQSSGPR
Q63HN8-4	RNF213	Isoform 2 of E3 ubiquitin-protein ligase RNF213		86		0.01		0.017075	0	3	0	3	0	0.4		LQNFSR,SSSALRTR,SIVEELCAWVEK
Q9C0D2-3	CEP295,KIAA1731	Isoform 3 of Centrosomal protein of 295 kDa		52		0.01			0	2	0	2	0	0.5		DPLRVSISR,QRKLNK
P05023-3	ATP1A1	sodium/potassium-transporting ATPase subunit alpha-1 isoform d	1111		1.01		2.1623		23	0	22	0	26.8	0	KADIGVAMGIAGSDVSK,GIVVYTGDR,LNIPVSQVNPR,YGTDLSR,AVFQANQENLPILK,VDNSSLTGESEPQTR,AVAGDASESALLK,NIAFFSTNCVEGTAR,ADIGVAMGIAGSDVSK,IMESFKNMVPQQALVIR,QGAIVAVTGDGVNDSPALK,IAGLCNR,NLEAVETLGSTSTICSDKTGTLTQNR,LIIVEGCQR,SPDFTNENPLETR,GVGIISEGNETVEDIAAR,IISANGCKVDNSSLTGESEPQTR,MSINAEEVVVGDLVEVK,DGPNALTPPPTTPEWIK,AVFQANQENLPILKR,VIMVTGDHPITAK,QGAIVAVTGDGVNDSPALKK
P31946	YWHAB	14-3-3 protein beta/alpha	229		0.95		1.5119		9	0	7	0	26.8	0	VISSIEQK,TMDKSELVQK,LAEQAERYDDMAAAMK,NVVGARR,VISSIEQKTER,AVTEQGHELSNEER,NLLSVAYK
P15531-2	NME1	nucleoside diphosphate kinase A isoform a	126		0.87		1.1544		4	0	3	0	21.4	0	GDFCIQVGR,VMLGETNPADSKPGTIR,TFIAIKPDGVQR
P16402	HIST1H1D	Histone H1.3	148		0.75		1.7826		4	0	4	0	20.8	0	KVAGAATPK,ALAAAGYDVEKNNSR,ASGPPVSELITK,SGVSLAALKK
P40227-2	CCT6A	T-complex protein 1 subunit zeta isoform b	380		0.71		1.6102		10	0	10	0	24	0	NAIDDGCVVPGAGAVEVAMAEALIK,GIDPFSLDALSK,SETDTSLIR,KVCGDSDKGFVVINQK,ALQFLEEVK,KFIEDR,KQDEPIDLFMIEIMEMK,GLVLDHGAR,GLQDVLR,SVTLLIK
P22234-2	PAICS	multifunctional protein ADE2 isoform 1	270		0.58		0.7302		6	0	6	0	17.3	0	EIVLADVIDNDSWR,VLLQSKDQITAGNAAR,IKAEYEGDGIPTVFVAVAGR,DQITAGNAAR,ACGNFGIPCELR,TKEVYELLDSPGK
Q6NXT2	H3F3C	Histone H3.3C	109		0.49		1.5119		3	0	3	0	18.5	0	STELLIR,KLPFQR,VTIMPKDIQLAR
Q14CN4-2	KRT72	Keratin protein K6irs	244		0.49		0.15478		6	0	5	0	4.3	0	RTAAENEFVVLKK,TAAENEFVVLK,FASFIDK,FASFIDKVR,TAAENEFVVLKK
Q16629-2	SRSF7	Isoform 2 of Serine/arginine-rich splicing factor 7	56		0.48		0.99526		2	0	2	0	28.1	0	NPPGFAFVEFEDPRDAEDAVR,VYVGNLGTGAGKGELER
O00264-2	PGRMC1	membrane-associated progesterone receptor component 1 isoform 2	127		0.47		2.1623		4	0	4	0	32.8	0	IVRGDQPAASGDSDDDEPPPLPR,ILMAINGK,DFTPAELR,FDGVQDPR
P60981-2	DSTN	destrin isoform b	59		0.44		0.25893		2	0	2	0	9.4	0	YALYDASFETK,YALYDASFETKESR
Q5JXB2	UBE2NL	Putative ubiquitin-conjugating enzyme E2 N-like	85		0.43		0.87382		2	0	2	0	19.6	0	TNEAQAIETAR,LLAEPVPGIKAEPDESNAR
P49915-2	GMPS	Isoform 2 of GMP synthase [glutamine-hydrolyzing]	249		0.4		0.77828		8	0	8	0	20	0	TVGVQGDCR,ELGLPEELVSR,ALNQEQVIAVHIDNGFMR,VINAAHSFYNGTTTLPISDEDRTPR,TLNMTTSPEEK,VICAEEPYICKDFPETNNILK,SGNIVAGIANESK,QADFEAHNILR
P47755-2	CAPZA2	unnamed protein product	94		0.37		0.6681		2	0	2	0	10.4	0	LLLNNDNLLR,TSVETALR
P55327-2	TPD52	tumor protein D52 isoform 3	116		0.37		0.9307		2	0	2	0	13.5	0	ASAAFSSVGSVITK,TSETLSQAGQK
O43242-2	PSMD3	unnamed protein product	166		0.36		0.44544		4	0	4	0	12.6	0	LQLDSPEDAEFIVAK,VYEFLDKLDVVR,ISDDLMQK,AIQLEYSEAR
O95433-2	AHSA1	unnamed protein product	104		0.34		0.4678		3	0	3	0	12.8	0	LDGEASINNR,EAMGIYISTLK,ITLKETFLTSPEELYR
P15153	RAC2	Ras-related C3 botulinum toxin substrate 2	105		0.33		1.6827		3	0	3	0	16.6	0	GLKTVFDEAIR,CVVVGDGAVGK,YLECSALTQR
P33993	MCM7	DNA replication licensing factor MCM7 isoform 1	248		0.32		0.40069		7	0	5	0	9.8	0	QVVQGLLSETYLEAHR,MVDVVEKEDVNEAIR,EVVNKDVLDVYIEHR,SITVLVEGENTR,TQRPADVIFATVR
P28482-2	MAPK1	extracellular signal-regulated kinase-2 splice variant	105		0.3		0.43845		3	0	3	0	8.8	0	ICDFGLAR,LKELIFEETAR,GQVFDVGPR
Q8TAA3-2	PSMA8	proteasome subunit alpha type-7-like isoform 3	112		0.3		0.4678		2	0	2	0	11.7	0	ALLEVVQSGGK,LTVEDPVTVEYITR
Q01130-2	SRSF2	splicing factor, arginine/serine-rich 2, isoform CRA_g	90		0.3		0.33352		2	0	2	0	4.7	0	VGDVYIPRDR,VGDVYIPR
P31948-3	STIP1	stress-induced-phosphoprotein 1 isoform c	260		0.3		0.54593		8	0	8	0	14.4	0	MEQVNELK,DFDTALK,LMDVGLIAIR,ILKEQER,ALDLDSSCKEAADGYQR,IGNSYFKEEK,TPDVLKK,EGLQNMEAR
P20839-2	IMPDH1	inosine-5'-monophosphate dehydrogenase 1 isoform g	203		0.27		0.51991		5	0	5	0	12.4	0	FEQGFITDPVVLSPSHTVGDVLEAK,NLIDAGVDGLR,IAQGVSGSIQDK,IAQGVSGSIQDKGSIQK,EANEILQR
B5ME19	EIF3CL	eukaryotic translation initiation factor 3 subunit C-like protein	281		0.24		0.33352		7	0	7	0	7	0	ELLGQGLLLR,AKELLGQGLLLR,DAHNALLDIQSSGR,KLNEILQAR,SIVDKEGVPR,CLEEFELLGK,FEELTNLIR
P13647	KRT5	keratin, type II cytoskeletal 5	203.5		0.235		0.2939		7	0	7	0	8.3	0	YEDEINKR,NLDLDSIIAEVK,FASFIDK,NKYEDEINKR,FASFIDKVR,FLEQQNK,ISISTSGGSFR
Q9Y230-2	RUVBL2	RuvB-like 2 (E. coli), isoform CRA_a	77		0.23		0.33352		3	0	3	0	10	0	DYDAMGSQTK,AVLIAGQPGTGK,TQGFLALFSGDTGEIKSEVR
Q13268-2	DHRS2	dehydrogenase/reductase SDR family member 2, mitochondrial isoform 1	71		0.22		0.29155		2	0	2	0	6.3	0	VNCVVPGIIK,TLALELAPK
P12814-2	ACTN1	Alpha-actinin-1 isoform c	327		0.21		0.33352		7	0	7	0	9.4	0	FAIQDISVEETSAK,CQLEINFNTLQTK,EGLLLWCQR,HRPELIDYGK,TINEVENQILTR,ELPPDQAEYCIAR,LSNRPAFMPSEGR
P32322-2	PYCR1	Pyrroline-5-carboxylate reductase 1, mitochondrial isoform 2	139		0.21		0.63789		3	0	3	0	13.2	0	SLLINAVEASCIR,ELQSMADQEQVSPAAIKK,LGAQALLGAAK
P50416-2	CPT1A	carnitine O-palmitoyltransferase 1, liver isoform isoform 2	226		0.2		0.33352		5	0	5	0	8.3	0	SCTTESCDFVR,ILDNTSEPQPGEAR,AMVDPAQTVEQR,AGNAIHAILLYR,LAALTAGDRVPWAR
Q99447-2	PCYT2	ethanolamine-phosphate cytidylyltransferase isoform 4	71		0.2		0.25893		2	0	2	0	6.7	0	ELAFLEAAR,TQGVSTTDLVGR
O00154-4	ACOT7	Brain acyl-CoA hydrolase	71		0.18		0.29155		2	0	2	0	6.5	0	KGCVITISGR,LMDEVAGIVAAR
Q8WVQ1-3	CANT1	unnamed protein product	62		0.18		0.22168		2	0	2	0	6.5	0	IGSVKYEGIEFI,TGVVYQIEGSK
Q9Y5K3-2	PCYT1B	choline-phosphate cytidylyltransferase B isoform 3	56		0.18		0.25893		2	0	2	0	6.6	0	TEGISTSDIITR,ELNVSFINEK
P43243-2	MATR3	matrin-3 isoform b	153		0.17		0.31826		3	0	3	0	7.3	0	IGPYQPNVPVGIDYVIPK,VVHIMDFQR,GNLGAGNGNLQGPR
P28066-2	PSMA5	proteasome subunit alpha type-5 isoform 2	63		0.17		0.77828		2	0	2	0	14.2	0	SSLIILK,AIGSASEGAQSSLQEVYHK
P39748	FEN1	Flap endonuclease 1	70		0.16		0.2452		2	0	2	0	8.1	0	EAHQLFLEPEVLDPESVELK,LIADVAPSAIR
P40763-2	STAT3	signal transducer and activator of transcription 3 isoform 2	234		0.16		0.3434		5	0	5	0	8.7	0	KLEELQQK,LLQTAATAAQQGGQANHPTAAVVTEK,TGVQFTTK,TQIQSVEPYTK,VVENLQDDFDFNYK
Q9UJU6-2	DBNL	Drebrin-like protein isoform a	111		0.14		0.21153		2	0	2	0	5.3	0	NRNEQESAVHPR,TWEQQQEVVSR
Q14451-2	GRB7	growth factor receptor-bound protein 7, isoform CRA_b	69		0.14		0.23285		2	0	2	0	8	0	GLEDHESVVEVQAAWPVGGDSR,EALSVALEEAQAWR
Q6P996-2	LOC101060433,PDXDC1	pyridoxal-dependent decarboxylase domain-containing protein 1 isoform 7	108		0.14		0.43845		3	0	3	0	9.7	0	FFQELPGSDPVFK,AVPVPNMTPSGVGR,ILVEDELSSPVVVFR
P61006-2	RAB8A	unnamed protein product	88		0.14		0.70125		3	0	3	0	12.5	0	TIELDGK,TITTAYYR,LQIWDTAGQER
Q09028-2	RBBP4	histone-binding protein RBBP4 isoform b	79		0.14		0.3895		2	0	2	0	3.7	0	TVALWDLR,LNVWDLSK
P30038-2	ALDH4A1	delta-1-pyrroline-5-carboxylate dehydrogenase, mitochondrial isoform b	123		0.12		0.1721		3	0	3	0	6.9	0	SADVESVVSGTLR,RAEILAK,STGSIVGQQPFGGAR
P07478	PRSS2	trypsin-2 isoform 2 preproprotein	111		0.12		0.9307		2	0	2	0	11.3	0	NRPGVYTK,LGEHNIEVLEGNEQFINAAK
Q13200-2	PSMD2	26S proteasome non-ATPase regulatory subunit 2 isoform 3	184		0.12		0.1885		3	0	3	0	5.8	0	VGQAVDVVGQAGKPK,MLVTFDEELRPLPVSVR,FGGSGSQVDSAR
Q05655-2	PRKCD	Isoform 2 of Protein kinase C delta type	213		0.12		0.34171		6	0	6	0	9.4	0	VLLGELK,AAEEPVSEVTVGVSVLAER,LLAEALNQVTQR,LGVTGNIK,VIQIVLMR,DYSNFDQEFLNEK
Q9Y2Q3-2	GSTK1	glutathione S-transferase kappa 1 isoform b	107		0.11		0.29155		2	0	2	0	10.2	0	FLTAVNLEHPEMLEK,AGMSAEQAQGLLEK
Q15560-2	TCEA2	transcription elongation factor A protein 2 isoform b	88		0.11		0.33352		2	0	2	0	8.4	0	NCTYTQVQTR,TGGTQTDLFTCGK
Q86VP6-2	CAND1	Isoform 2 of Cullin-associated NEDD8-dissociated protein 1	167		0.11		0.17877		4	0	4	0	4.9	0	EGPAVVGQFIQDVK,LLEDKNGEVQNLAVK,QSYYSIAK,MLTGPVYSQSTALTHK
Q8NFV4	ABHD11	alpha/beta hydrolase domain-containing protein 11 isoform 1	62		0.1		0.35936		2	0	2	0	7.3	0	GGAEPRPLPLSYR,AINIADELPR
Q8IYD1	GSPT2	eukaryotic peptide chain release factor GTP-binding subunit ERF3B	56		0.1		0.18597		2	0	2	0	3.3	0	KGEFETGFEK,FVKQDQVCIAR
Q06033-2	ITIH3	Isoform 2 of Inter-alpha-trypsin inhibitor heavy chain H3	88		0.1		0.22528		3	0	3	0	4.2	0	EVSFDVELPK,VTFELTYEELLKR,ALQERDYIFGNYIER
O43852-2	CALU	calumenin isoform b precursor	52		0.09		0.35936		2	0	2	0	8.2	0	HLVYESDQNKDGK,TFDQLTPEESKER
P13796	LCP1	Plastin-2	66		0.09		0.12534		2	0	2	0	3.5	0	MINLSVPDTIDER,ALENDPDCR
O75746	SLC25A12	Calcium-binding mitochondrial carrier protein Aralar1	92		0.09		0.22528		3	0	3	0	4.1	0	RGDPHELR,LTVNDFVR,LQVAGEITTGPR
Q15599-2	SLC9A3R2	Na(+)/H(+) exchange regulatory cofactor NHE-RF2 isoform b	54		0.09		0.29155		2	0	2	0	5.8	0	IKAVEGQTR,SVDPGSPAAR
P04626-2	ERBB2	Isoform 2 of Receptor tyrosine-protein kinase erbB-2	73		0.09		0.23285		2	0	2	0	5.1	0	VLGSGAFGTVYK,FVVIQNEDLGPASPLDSTFYR
Q9BZJ0-2	CRNKL1	crooked neck-like protein 1 isoform d	50		0.08		0.11588		2	0	2	0	2.9	0	AIYELAISQPR,GIEDIIVSK
Q9NR30-2	DDX21	nucleolar RNA helicase 2 isoform 2	97		0.08		0.21153		3	0	3	0	4.7	0	IGVPSATEIIK,APQVLVLAPTR,EAQELSQNSAIK
Q3KQV9-2	UAP1L1	UDP-N-acteylglucosamine pyrophosphorylase 1-like 1, isoform CRA_c	61		0.08		0.41254		2	0	2	0	6.2	0	FVFDVFR,NFAALEVLREEEFSPLK
P50570-2	DNM2	dynamin-2 isoform 3	55		0.07		0.098541		2	0	2	0	2.5	0	NLVDSYVAIINK,GISPVPINLR
P19827	ITIH1	inter-alpha-trypsin inhibitor heavy chain H1 isoform a precursor	50.5		0.07		0.082637		3	0	3	0	2.3	0	KAAISGENAGLVR,AAISGENAGLVR,SQILKNVR
Q86TI2-2	DPP9	Dipeptidyl peptidase 9	85		0.06		0.11588		2	0	2	0	3.9	0	ILYEEVDESEVEVIHVPSPALEER,LAEFQTDSQGK
Q12840	KIF5A	Kinesin heavy chain isoform 5A	69		0.06		0.075836		2	0	2	0	2.3	0	ILQDSLGGNCR,ISFLENNLEQLTK
Q08170	SRSF4	Serine/arginine-rich splicing factor 4	58		0.06		0.14505		2	0	2	0	3.4	0	SPSRSRSR,LIVENLSSR
Q9UNN5-2	FAF1	Isoform Short of FAS-associated factor 1	56		0.06		0.23285		2	0	2	0	4.8	0	TGDVEDSTVLK,LFPQETLFLEAKE
P20700	LMNB1	lamin-B1 isoform 1	64		0.05		0.13646		2	0	2	0	3.2	0	LLEGEEER,KESDLNGAQIK
P56192-2	MARS	unnamed protein product	72		0.05		0.35031		3	0	3	0	5.3	0	RLEEWLGR,KGEDVLGSVRR,QPQPSPAEGR
P46459-2	NSF	unnamed protein product	48		0.05		0.12884		2	0	2	0	3.5	0	IAEESNFPFIK,GILLYGPPGCGK
Q96PN6-2	ADCY10	adenylate cyclase type 10 isoform 3	53		0.04		0.027136		2	0	2	0	0.9	0	AKNLLPR,FCNPMMQK
O15550	KDM6A	lysine-specific demethylase 6A isoform 3	64		0.04		0.084146		2	0	2	0	1.2	0	ALSAYQR,SCSNTSALAAR
P31327-2	CPS1	carbamoyl-phosphate synthase [ammonia], mitochondrial isoform c	45		0.03		0.084146		2	0	2	0	1.8	0	IALGIPLPEIK,LFAEAVQK
Q8NB25-2	FAM184A	Isoform 2 of Protein FAM184A	54		0.03		0.067011		2	0	2	0	2	0	EIQELLKSQQDHSASVNKGQEK,EIQELLK
P10721-2	KIT	mast/stem cell growth factor receptor Kit isoform 2 precursor	60		0.03		0.089023		2	0	2	0	1.8	0	QATLTISSAR,ICDFGLAR
Q12852-2	MAP3K12	mitogen-activated protein kinase kinase kinase 12 isoform 1	49		0.03		0.13646		2	0	2	0	3.3	0	FHGEEVAVKK,ANNLYMELNALMLQLELKER
P0C0L4-2	C4A	complement C4-A isoform 2 preproprotein	82		0.02		0.09515		3	0	3	0	1.5	0	YVLPNFEVK,ANSFLGEK,YRVFALDQK
Q86YZ3	HRNR	Hornerin	76		0.02		0.092601		2	0	2	0	1.8	0	GSGSGQSPSYGR,SSSRGPYESR
Q9BY89	KIAA1671	Uncharacterized protein KIAA1671	55		0.02		0.043154		2	0	2	0	1.3	0	EGDPGPAQVPQPAVR,SGPFVDQLK
Q00341-2	HDLBP	Isoform 2 of Vigilin	43		0.02		0.033441		2	0	2	0	1.7	0	TIIGQKGER,IEGDPQGVQQAK
P30049	ATP5D	ATP synthase subunit delta, mitochondrial precursor		55				0.77828	0	2	0	2	0	7.1		IEANEALVK,IEANEALVKALE
P62277	RPS13	40S ribosomal protein S13		53				0.6681	0	2	0	2	0	10.5		DSHGVAQVR,LILIESR
P02686	MBP	Golli-Mbp isoform 1		44				0.53993	0	2	0	2	0	9.2		TAHYGSLPQKSHGR,MGNHAGKRELNAEK
Q9P0J0-2	NDUFA13	unnamed protein product		44				0.4678	0	2	0	2	0	12.1		LQIEDFEAR,VKQDMPPPGGYGPIDYKR
Q9BRF8	CPPED1	serine/threonine-protein phosphatase CPPED1 isoform a		49				0.3895	0	2	0	2	0	5.4		TEQTEDLKR,VVVVTAEK
Q96A49	SYAP1	Synapse-associated protein 1		45				0.35936	0	2	0	2	0	5.3		EMEQLVLDKK,KFVEEQHTK
P17900	GM2A	ganglioside GM2 activator isoform 1 precursor		49				0.33352	0	2	0	2	0	9.8		IESVLSSSGKR,IAASLKGI
Q86X76-2	NIT1	nitrilase homolog 1 isoform 4		45				0.33352	0	2	0	2	0	4.8		IDLNYLR,TCAELVR
P42025	ACTR1B	Beta-centractin		59				0.31113	0	2	0	2	0	4.5		ISAPQER,AGFAGDQIPK
P20783-2	NTF3	Neurotrophin-3 isoform 1 preproprotein		47				0.31113	0	2	0	2	0	5.5		LIQADILK,SSAIDIR
Q9NUQ9	FAM49B	protein FAM49B		47				0.27427	0	2	0	2	0	10.1		INNVPAEGENEVNNELANR,EAIQHPADEKLQEK
Q14108	SCARB2	lysosome membrane protein 2 isoform 1 precursor		42				0.25893	0	2	0	2	0	5.2		VFQKAVDQSIEK,DQSVGDPKIDLIR
Q9Y2Z0-2	SUGT1	suppressor of G2 allele of SKP1 homolog isoform SGT1A		42				0.2452	0	2	0	2	0	7.8		NLYPSSSPYTR,LFQQIYSDGSDEVKR
P23246-2	SFPQ	splicing factor proline/glutamine-rich (polypyrimidine tract binding protein associated), isoform CRA_d		55				0.19378	0	2	0	2	0	3.7		LFVGNLPADITEDEFKR,AVVIVDDR
Q9Y2W2	WBP11	WW domain-binding protein 11		50				0.19378	0	2	0	2	0	2.9		RENKGATAAPQR,ENPDIYK
Q02779	MAP3K10	mitogen-activated protein kinase kinase kinase 10		44				0.1885	0	2	0	2	0	2.4		SREEELLRAAQEQR,WLDGLFFPR
Q8NEF3-2	CCDC112	coiled-coil domain-containing protein 112 isoform 1 precursor		40				0.1721	0	2	0	2	0	3.4		NQVINMEK,KQKLAVEAWK
Q96A05	ATP6V1E2	V-type proton ATPase subunit E 2		57				0.13646	0	2	0	2	0	3.9		EKQIEQQK,KEKQIEQQK
Q9BUJ2-2	HNRNPUL1	heterogeneous nuclear ribonucleoprotein U-like 1, isoform CRA_d		52				0.13254	0	2	0	2	0	2.6		HLPSTEPDPHVVR,INEEISVK
Q5SQ80	ANKRD20A2	Ankyrin repeat domain-containing protein 20A2		75				0.13128	0	3	0	3	0	4		TEGVVSIK,LNAELLK,LEADIESYQSRLAAAISK
Q13435	SF3B2	Splicing factor 3b subunit 2		41				0.13063	0	4	0	4	0	4.8		AAVLLEQERQQEIAK,LENSAAPKKK,FTVAELK,AQPQDSRGGSK
Q6ZVF9	GPRIN3	G protein-regulated inducer of neurite outgrowth 3		42				0.12884	0	2	0	2	0	1.9		LAGMTPVR,TLLLNPK
Q96G03	PGM2	Phosphoglucomutase-2		45				0.12534	0	2	0	2	0	1.9		LFENLR,YNLQPK
Q14118	DAG1	Dystroglycan		45				0.12202	0	2	0	2	0	2.1		GGEPNQRPELK,EQIAGLSR
Q96GQ7	DDX27	Probable ATP-dependent RNA helicase DDX27		46				0.11887	0	2	0	2	0	2.5		ALQEFDLALR,KKGEMTAEER
P22894	MMP8	neutrophil collagenase isoform 1 preproprotein		44				0.11588	0	2	0	2	0	3.4		KNGTNVIVEK,LKEMQR
Q5ST30-4	VARS2	valine--tRNA ligase, mitochondrial isoform 1		48				0.10776	0	2	0	2	0	1.7		QATLEAEIAGESK,IWNALR
Q14CX7-2	NAA25	chromosome 12 open reading frame 30, isoform CRA_a		41				0.1053	0	2	0	2	0	1.7		LYEAAVK,LTSEIQSR
Q8IV76-2	PASD1	PAS domain containing protein 1		47				0.1053	0	2	0	2	0	1.7		EQLQQLR,EQLQQLREQRK
P55060-4	CSE1L	exportin-2 isoform 2		51				0.10294	0	2	0	2	0	2.5		DLEGSDIDTR,EHDPVGQMVNNPK
P0C6S8	LINGO3	leucine-rich repeat and immunoglobulin-like domain-containing nogo receptor-interacting protein 3 precursor		52				0.10069	0	2	0	2	0	3.8		LRGNQLK,LRHLAIASLEDQNFRR
Q9UII4	HERC5	E3 ISG15--protein ligase HERC5		42				0.098541	0	2	0	2	0	2.4		DGQLGNGGTRDQLMPLPVK,DNLLKR
O00192	ARVCF	armadillo repeat protein deleted in velo-cardio-facial syndrome		42				0.096478	0	2	0	2	0	3.5		GGGPVATLSR,EDCNVHSAASILASVKEQEARFER
Q9UHB6-4	LIMA1	LIM domain and actin-binding protein 1 isoform 1		52				0.096478	0	2	0	2	0	2.2		RNLELPR,ADQEEQIHPR
O60870-2	KIN	unnamed protein product		57				0.089023	0	2	0	2	0	4		LGEKYHK,NDFLELLR
Q86UP2-2	KTN1	kinectin isoform c		74				0.089023	0	3	0	3	0	2.1		LMQLMESEQK,VQELQNLLK,QSAELNKLR
O60284	ST18	suppression of tumorigenicity 18 protein		48				0.079775	0	2	0	2	0	1.2		VIDMGGR,QIFNNK
Q8WWZ4-2	ABCA10	Isoform 2 of ATP-binding cassette sub-family A member 10		46				0.079775	0	2	0	2	0	1.6		IIMELDMQSIQDIIAK,EDAALSISR
P11047	LAMC1	laminin subunit gamma-1 precursor		51				0.068	0	2	0	2	0	1.3		EVMDLLR,LSAEDLVLEGAGLR
Q96AX1	VPS33A	Vacuolar protein sorting-associated protein 33A		45				0.06605	0	2	0	2	0	2.8		EAVRRELR,DFHILFVPR
Q09161	NCBP1	Nuclear cap-binding protein subunit 1		39				0.064209	0	2	0	2	0	2.7		KMNKHVLK,RRHSDENDGGQPHK
O95197-2	RTN3	reticulon-3 isoform b		51				0.059254	0	2	0	2	0	1.9		SIVEKIQAK,TQIDHYVGIAR
Q6YHU6-2	THADA	Isoform 2 of Thyroid adenoma-associated protein		45				0.057768	0	2	0	2	0	1		EPENELTK,QQICSLLKK
Q9C0G0-3	ZNF407	zinc finger protein 407 isoform 3		39				0.053725	0	2	0	2	0	1.1		IGTLPGIQNNR,DCAQGVKK
Q9H0M0-3	WWP1	Isoform 3 of NEDD4-like E3 ubiquitin-protein ligase WWP1		44				0.0525	0	2	0	2	0	2		YFVDHNTRTTTFKDPR,TTTFKDPR
A2RUR9-2	CCDC144A	Isoform 2 of Coiled-coil domain-containing protein 144A		47				0.04914	0	2	0	2	0	2.6		QQLKWNLR,KKMNSEISHR
Q8N961	ABTB2	Ankyrin repeat and BTB/POZ domain-containing protein 2		41				0.047129	0	2	0	2	0	1.6		VAREAQR,WMVDTRISVR
Q8TF72	SHROOM3	protein Shroom3		48				0.043979	0	2	0	2	0	0.8		SSPATADKR,LTPEQKK
Q8NAT2-1	TDRD5	tudor domain-containing protein 5 isoform 1		44				0.042754	0	2	0	2	0	1.3		KQKEPQQK,IQECLR
H7BZ55	CROCC2	Putative ciliary rootlet coiled-coil protein-like 3 protein		44				0.042754	0	2	0	2	0	1.2		LETTEAQLR,QTRSGGLGQPR
P28290-2	SSFA2	Isoform 2 of Sperm-specific antigen 2		49				0.042754	0	2	0	2	0	0.9		VNTALQRAQMK,VNTALQR
O75376	NCOR1	nuclear receptor corepressor 1 isoform 1		52				0.042361	0	2	0	2	0	0.8		LEENLR,QQESAKSATLPYIK
Q86VF7-2	NRAP	Isoform 2 of Nebulin-related-anchoring protein		47				0.037837	0	2	0	2	0	1.2		TKGKAMGTADSR,KAGQLVSEK
Q8N4C6-10	NIN	Isoform 3 of Ninein		42				0.037225	0	2	0	2	0	1		LQTMVQNTK,NEIAELQGQAAVLK
Q6P2Q9	PRPF8	Pre-mRNA-processing-splicing factor 8		48				0.036344	0	2	0	2	0	0.6		VQMLLSDR,QQIAEIEK
Q15643	TRIP11	Thyroid receptor-interacting protein 11		44				0.035779	0	2	0	2	0	1.1		QEMLDDVQKK,ARQIALQDQLLK
Q7Z6E9-2	RBBP6	e3 ubiquitin-protein ligase RBBP6 isoform 2		40				0.026511	0	2	0	2	0	1.2		GYAAGAQPRPSANR,KAKEETPK
Q5JPF3	ANKRD36C	Ankyrin repeat domain-containing protein 36C		48				0.024798	0	2	0	2	0	1.1		KKANINAVDYLGR,ASVLQKR
P15924	DSP	Desmoplakin isoform I		56				0.024404	0	3	0	3	0	0.9		RVEEDIQQQK,NKFLDQNLQK,KNLIDR
Q3V6T2-2	CCDC88A	Girdin isoform 2		50				0.020961	0	3	0	2	0	0.8		NNATLQAEK,RLIDER
Q5VUA4	ZNF318	Zinc finger protein 318		50				0.020586	0	2	0	2	0	0.7		GTMVETALK,LQLKEEVK
Q9NYC9-2	DNAH9	Isoform 2 of Dynein heavy chain 9, axonemal		52				0.019455	0	2	0	2	0	0.2		YYNLIK,MNILTR
Q15149-2	PLEC	Plectin isoform 1c		53				0.019381	0	5	0	5	0	1		LRDVGAYSK,LLLWSQR,QAQEEAERLRR,ELEQLGRQLR,QAEAAERSR
Q9UQ35	SRRM2	serine/arginine repetitive matrix protein 2		43				0.019212	0	2	0	2	0	0.7		TPAAAAAMNLASPR,RGQRGDSR
P15924-2	DSP	desmoplakin isoform II		46				0.016348	0	2	0	2	0	0.9		ENDKQETWMLMELQK,KNLIDR
P46013-2	MKI67	antigen KI-67 isoform 2		43				0.015163	0	2	0	2	0	0.6		CLRSAR,NIYAFMGTPVQK
Q8WZ42-2	TTN	Isoform 2 of Titin		95				0.00511	0	5	0	5	0	0.1		VNSRPIKDLK,QVTQEAMRK,KGQVLSTSAR,KGDQILK,NAVGVSLPR
Q9NP61-2	ARFGAP3	ADP-ribosylation factor GTPase-activating protein 3 isoform 2		43					0	2	0	2	0	3.8		DEKMNISGKK,KGSLGAQK
P35612	ADD2	beta-adducin isoform a	43				0.12884		2	0	2	0	2.7	0	ETAPEEPGSPAK,SPLVSPSK
Q9UPS8-3	ANKRD26	Ankyrin repeat domain-containing protein 26 isoform 1	48				0.02306		2	0	2	0	0.9	0	KTSNEKNK,QQMVEFLIK
Q9HBG4	ATP6V0A4	V-type proton ATPase 116 kDa subunit a isoform 4	46				0.24094		2	0	2	0	4.7	0	RALEQGMELSGSSMAPIMTTVQSKTAPPTFNR,FYVGDGYK
P20290-2	BTF3	transcription factor BTF3 isoform B	58				0.33352		2	0	2	0	11.1	0	IGGKGTAR,MKETIMNQEK
Q14204	DYNC1H1	Cytoplasmic dynein 1 heavy chain 1	44				0.0087601		2	0	2	0	0.3	0	EYQTQLIQR,EVKMGAK
Q96I24	FUBP3	Far upstream element-binding protein 3	47				0.16591		2	0	2	0	3.1	0	LLGQIVDR,AAQVMGPPDR
Q96RW7-2	HMCN1	PREDICTED: hemicentin-1 isoform X2	49				0.018819		2	0	2	0	0.2	0	ILETSLK,KQVNEVLK
A4D0S4-3	LAMB4	PREDICTED: laminin subunit beta-4 isoform X5	44				0.062468		2	0	2	0	0.9	0	QIMQLNEQLK,AVQGLMR
Q8WWI1-3	LMO7	LIM domain only protein 7 isoform 1	42				0.083637		2	0	2	0	3.2	0	KSYTSDLQKK,AYMRNPSSSVPPPSAGSVKTSTTGVATTQSPTPR
Q9NU22	MDN1	Midasin	46				0.016643		2	0	2	0	0.3	0	QFPLHEK,QEEIDVIQEVLEK
Q8TDZ2-2	MICAL1	protein-methionine sulfoxide oxidase MICAL1 isoform 2	43				0.053725		2	0	2	0	3	0	NSLVAEEAELMITVQELNLEEK,LSSPERQR
O15344-2	MID1	midline 1 (Opitz/BBB syndrome), isoform CRA_b	52				0.1721		2	0	2	0	3.8	0	QNLESNLTNLIKR,AINQAGSR
P00540	MOS	Proto-oncogene serine/threonine-protein kinase mos	44				0.33352		2	0	2	0	4.6	0	LLLGATLPR,LGDVIQR
P58872-2	RHBDL3	RHBDL3 protein	48				0.3895		2	0	2	0	5.2	0	NSLVYHPQLR,RSNSFR
P21817-2	RYR1	Ryanodine receptor 1 isoform 2	60				0.028835		3	0	3	0	0.9	0	IIVNNLGIDEASWMK,ISRQNQR,GAAEMVLQMISACKGETGAMVSSTLK
Q12792-3	TWF1	Twinfilin-1 isoform 1	73				0.3895		3	0	3	0	10.3	0	KIEIDNGDELTADFLYEEVHPK,LLEIVER,EAFQALEK
P04628	WNT1	proto-oncogene Wnt-1 precursor	44				0.25893		2	0	2	0	6.4	0	NCTHTR,QNPGILHSVSGGLQSAVR
Q96NJ6	ZFP3	zinc finger protein 3 homolog	42				0.072267		2	0	2	0	3.1	0	KSPSSEK,DRENNESER
Q5T5S1-2	CCDC183	Isoform 2 of Coiled-coil domain-containing protein 183	43						2	0	2	0	2.5	0	ENRLNQQKK,RARENR
Q6V0I7-3	FAT4	Isoform 3 of Protocadherin Fat 4	48				0.027459		2	0	2	0	0.7	0	LDITLNPSGEGAFLHLVSK,FQVNAQSGVISTRMALDR
Q86WG5-3	SBF2	Isoform 3 of Myotubularin-related protein 13	48				0.089023		2	0	2	0	1.5	0	STMEQLVEK,LFSLGAGDR
Q96RT1-3	ERBIN	Isoform 3 of Protein LAP2	47				0.061632		2	0	2	0	2.1	0	MPLSNGQMGQPLRPQASVAR,YPNLESVNK
